# Supplementary material for: Chemoselective and diastereodivergent synthesis of new spirooxindolo-pyrrolizidines and pyrrolidines stemming from unsymmetrical 1,3-bis(arylidene)tetral-2-ones: a combined experimental and theoretical study
Source: Royal Society of Chemistry journal article supplement (doi:10.1039/d2nj03887k), 2022-01-01
Supplement: d2nj03887k1.pdf [file d2nj03887k1.pdf]

# Chemoselective and diastereodivergent synthesis of new spirooxindolo-pyrrolizidines and pyrrolidines stemming from unsymmetrical 1,3-bis(arylidene)tetral-2-ones: A combined experimental and theoretical study.

Houda Gazzeh,<sup>a</sup> Fadwa Rouatbi,<sup>a</sup> Sami Chniti,<sup>a</sup> Moheddine Askri,<sup>a</sup> Michael Knorr,<sup>b</sup> Carsten Strohmann,<sup>c</sup> Christopher Golz,<sup>d</sup> Al Mokhtar Lamsabhi,<sup>e,f,\*</sup>

<sup>a</sup>Laboratory of Heterocyclic chemistry Natural Product and Reactivity/CHPNR, Department of Chemistry, Faculty of Science of Monastir, 5000 Monastir, Tunisia.

<sup>b</sup> Institute UTINAM-UMR CNRS 6213, Université de Franche-Comté, 16 Route de Gray, 25030 Besançon, France.

<sup>c</sup> Technische Universität Dortmund, Anorganische Chemie Ott-Hahn-Strasse 6, 44221 Dortmund, Germany.

<sup>d</sup> Georg-August-University Göttingen, Institute of Organic and Biomolecular Chemistry, Tammannstraße 2, D-37077, Göttingen

<sup>e</sup> Department of Chemistry, Universidad Autónoma de Madrid, Cantoblanco, 28049 Madrid (Spain), [mokhtar.lamsabhi@uam.es](mailto:mokhtar.lamsabhi@uam.es)

<sup>f</sup> Institute for Advanced Research in Chemical Sciences (IAdChem), Universidad Autónoma de Madrid, 28049 Madrid, Spain.

## Electronic Supporting Information

| CONTENTS                                                                                                                                | Page  |
|-----------------------------------------------------------------------------------------------------------------------------------------|-------|
| 1-1. Spectroscopic data of compounds <b>4/5 a-k</b> and <b>16-17a-c</b>                                                                 | 2-12  |
| 1-2. <sup>1</sup> H and <sup>13</sup> C{ <sup>1</sup> H} NMR spectra of compounds <b>4/4 a-k</b> and <b>16-17a-c</b> (Fig. 1S to 40S)   | 12-33 |
| 1-3. Structure of compound <b>5k</b> and the associated <sup>1</sup> H and <sup>13</sup> C{ <sup>1</sup> H} chemical shifts (Fig.41S)   | 34    |
| 1-3. Structure of compound <b>17a</b> and the associated <sup>1</sup> H and <sup>13</sup> C{ <sup>1</sup> H} chemical shifts (Fig.42S)  | 34    |
| 2. Crystallographic supplementary information                                                                                           | 34    |
| 2-1. Plot of an alternative view of the molecular structure of <b>4k</b> (Fig 43S)                                                      | 34    |
| 2-2. View of a layer of <b>4k</b> due to intermolecular hydrogen bridging generating a two-dimensional supramolecular lattice (Fig 44S) | 34    |
| 2-2. Table 1: Selected bond lengths (Å) and angles (°) of <b>4k</b>                                                                     | 35    |
| 2-3. Table 2: Hydrogen bonds occurring in <b>4k</b>                                                                                     | 35    |
| 2-4. Table 3: Crystal data collection and structure refinement of <b>4k</b>                                                             | 36    |
| 4- The different possible approaches of the dipolarophile across the azomethine ylides on the double bond at the 1-position. (Fig 45)   | 37    |
| 5- Cartesian coordinates of the optimized structures                                                                                    | 38    |

**2.1.1. (2R, 3S, 4S, 5R) Spiro[2,3']-oxindole-spiro[3,3']-1''(naphtylidene)tetral-2''-one-4-naphtylpyrrolizidine (4a)**

Yellow oil, (0.24 g; 39%); <sup>1</sup>H NMR (CDCl<sub>3</sub>, 400 MHz) δ:1.75-2.01 (2m, 2H, H-6<sub>a</sub>/H-7<sub>a</sub>); 2.08-2.13 (2m, 2H, H-6<sub>b</sub>/H-7<sub>b</sub>), 2.17 (d, *J*= 15 Hz, 1H, H-4''); 2.49-2.61 (m, 1H, H-8<sub>a</sub>); 3.31-3.40 (m, 1H, H-8<sub>b</sub>); 3.52 (d, *J*= 15 Hz, 1H, H-4''); 4.84 (d, *J*= 9 Hz, H-4) 4.95-5.04 (m, 1H, H-5); 6.22-7.97 (m, 22H, H<sub>arom</sub>); 7.99 (s, 1H, H<sub>ethylenic</sub>); 8.03 (s.l, 1H, H<sub>amide</sub>); <sup>13</sup>C NMR (CDCl<sub>3</sub>, 100 MHz) δ: 24.3, 27.6, 34.8, 47.0, 54.2, 63.9, 65.7, 73.5, 108.4, 120.9, 125.0, 125.2, 125.4, 125.6, 125.7, 126.2, 126.4, 126.9, 127.0, 127.1, 127.3, 127.7, 127.8, 128.1, 128.9, 129.4, 129.7, 132.1, 132.2, 132.6, 132.7, 133.2, 134.0, 135.3, 135.4, 136.9, 140.5, 176.5, 200.8, **IR (ν<sub>max</sub>, cm<sup>-1</sup>)** : 1498; 1581; 1684; 1727; 3110 cm<sup>-1</sup>; Anal. Calcd. for C<sub>44</sub>H<sub>39</sub>N<sub>2</sub>O<sub>2</sub>: C, 84.18; H, 6.26; N, 4.46; found: C, 84.14; H, 6.27; N, 4.43.

**2.1.2. (2R, 3S, 4S, 5R) Spiro[2,3']-oxindole-spiro[3,3']-1''(p-tolylidene)tetral-2''-one-4-(p-tolyl)pyrrolizidine (4b)**

Yellow oil, (0.22 g; 41%); <sup>1</sup>H NMR (CDCl<sub>3</sub>, 400 MHz) δ:1.77-1.94 (2m, 2H, H-6<sub>a</sub>/H-7<sub>a</sub>); 2.01-2.21 (2m, 2H, H-6<sub>b</sub>/H-7<sub>b</sub>), 2.22 (s, 3H, CH<sub>3</sub>); 2.26 (d, *J*= 15 Hz, 1H, H-4''); 2.27 (s, 3H, CH<sub>3</sub>); 2.53-2.61 (m, 1H, H-8<sub>a</sub>); 3.35-3.40 (m, 1H, H-8<sub>b</sub>); 3.38 (d, *J*= 15 Hz, 1H, H-4''); 4.61 (d, *J*= 12 Hz, 1H, H-4); 4.85-4.94 (m, 1H, H-5); 6.30-7.42 (m, 17H, 16H<sub>arom</sub> + 1H<sub>amide</sub>); 7.71 (s, 1H, 1H<sub>ethylenic</sub>) <sup>13</sup>C NMR (CDCl<sub>3</sub>, 100 MHz) δ: 20.6; 20.8; 24.2; 27.7; 34.7; 47.4; 54.0; 63.1; 65.7; 73.8; 108.7; 120.8; 125.2; 125.4, 125.6; 126.0; 126.9; 128.0; 128.2; 128.4; 128.5, 128.6; 128.7, 129.1; 129.3; 129.9; 131.9; 132.2; 132.5; 133.8; 134.7; 135.9; 136.9; 138.7; 140.8; 177.1; 201.3; **IR (ν<sub>max</sub>, cm<sup>-1</sup>)**: 1510; 1581; 1679; 1732; 2975 cm<sup>-1</sup>; Anal. Calcd. for C<sub>38</sub>H<sub>39</sub>N<sub>2</sub>O<sub>2</sub>: C. 82.13; H. 7.07; N. 5.04; found: C. 82.09; H. 7.05; N. 5.03.

**2.1.3. (2R, 3S, 4 S, 5R) Spiro [2,3']-oxindole-spiro [3,3']-1''(p-fluorobenzylidene)tetral-2''-one-4-(p-fluorobenzyl)pyrrolizidine (4c)**

Yellow oil, (0.22 g; 40%); <sup>1</sup>H NMR (CDCl<sub>3</sub>, 400 MHz) δ :1.75-1.95 (2m, 2H, H-6<sub>a</sub>/H-7<sub>a</sub>); 2.06-2.17 (2m, 2H, H-6<sub>b</sub>/H-7<sub>b</sub>); 2.21 (d, *J*= 15 Hz, 1H, H-4''); 2.53-2.65 (m, 1H, H-8<sub>a</sub>); 3.35 (d, *J*= 15 Hz, 1H, H-4''); 3.28-3.48 (m, 1H, H-8<sub>b</sub>); 4.59 (d, *J*= 9 Hz, H-4); 4.78-4.89 (m, 1H, H-5); 6.30-7.50 (m, 16H, H<sub>arom</sub>); 7.66 (s, 1H, H<sub>ethylenic</sub>); 8.00 (s.l, 1H, H<sub>amide</sub>); <sup>13</sup>C NMR

(CDCl<sub>3</sub>, 100 MHz)  $\delta$  : 24.2; 27.6; 34.7; 47.3; 53.5; 63.0; 66.0; 73.6; 108.7; 114.6; 114.9; 115.0; 120.9; 124.8; 125.6; 125.9; 126.8; 127.1; 128.2; 129.4; 130.7; 130.9; 131.0; 131.7; 133.2; 133.3; 135.7; 140.6; 163.0; 164.0; 176.7; 200.9; **IR** ( $\nu_{\max}$ , cm<sup>-1</sup>): 1519; 1590; 1694; 1718; 2988 cm<sup>-1</sup>; Anal.Calcd. for C<sub>36</sub>H<sub>33</sub>N<sub>2</sub>O<sub>2</sub>: C, 76.71; H, 5.90; F, 6.74; N, 4.97; found: C, 76.65; H, 5.92; F, 6.72; N, 4.95.

**2.1.4. (2R, 3S, 4S, 5R) Spiro [2,3']-oxindole-spiro [3,3']-1''-(p-cyanobenzylidene)tetral-2''-one-4-(p-cyanobenzyl)pyrrolizidine (4d)**

Yellow powder, (0.18 g; 32%); <sup>1</sup>H NMR (CDCl<sub>3</sub>, 400 MHz)  $\delta$  : 1.71-1.80 (2m, 2H, H-6<sub>a</sub>/H-7<sub>a</sub>); 1.82-1.94 (2m, 2H, H-6<sub>b</sub>/H-7<sub>b</sub>); 2.12 (d, *J*= 15 Hz, 1H, H-4''); 2.56-2.61 (m, 1H, H-8<sub>a</sub>); 3.28 (d, *J*= 9 Hz, 1H, H-4''); 3.31-3.36 (m, 1H, H-8<sub>b</sub>); 4.63 (d, *J*= 9 Hz, H-4); 4.85-4.89 (m, 1H, H-5); 6.24-7.65 (m, 12H, H<sub>arom</sub>); 7.68 (s, 1H, H<sub>ethylenic</sub>); <sup>13</sup>C NMR (CDCl<sub>3</sub>, 100 MHz)  $\delta$  : 24.6; 28.1; 35.1; 47.6; 54.4; 63.6, 66.2; 73.7; 109.3; 111.0; 112.0; 118.4; 118.8; 120.4, 121.6; 125.3, 126.0, 126.2, 126.6; 127.1; 128.4; 129.1; 129.8; 130.2; 130.6; 131.4; 131.6; 132.0; 132.2; 135.0; 135.3; 140.1; 179.4, 201.0; **IR** ( $\nu_{\max}$ , cm<sup>-1</sup>): 1478; 1596; 1688; 1714; 2225; 2923 cm<sup>-1</sup>; Anal. Calcd. for C<sub>38</sub>H<sub>33</sub>N<sub>4</sub>O<sub>2</sub>: C, 79.00; H, 5.76; N, 9.70; found: C, 78.94; H, 5.72; N, 9.72.

**2.1.5. (2R, 3S, 4S, 5R) Spiro [2,3'] N-methyloxindole-spiro[3,3']-1''(naphtylidene)tetral-2''-one-4-(naphtyl)pyrrolizidine (4e)**

Yellow oil, (0.33g; 52%); <sup>1</sup>H NMR (CDCl<sub>3</sub>, 400 MHz)  $\delta$  : 1.81-1.93 (2m, 2H, H-6<sub>a</sub>/H-7<sub>a</sub>); 2.04-2.15 (2m, 2H, H-6<sub>b</sub>/H-7<sub>b</sub>); 2.21 (d, *J*= 15 Hz, 1H, H-4''); 2.58-2.68 (m, 1H, H-8<sub>a</sub>); 2.78 (s, 3H, CH<sub>3</sub>); 3.41 (d, *J*= 15 Hz, 1H, H-4''); 3.44-3.54 (m, 1H, H-8<sub>b</sub>); 4.85 (d, *J*= 9 Hz, H-4); 5.11-5.19 (m, 1H, H-5); 6.14-7.92 (m, 22H, H<sub>arom</sub>); 7.97 (s, 1H, H<sub>ethylenic</sub>); <sup>13</sup>C NMR (CDCl<sub>3</sub>, 100 MHz)  $\delta$  : 23.9; 25.3; 27.6; 35.0; 47.8; 54.5; 65.9; 73.7; 107.0; 121.0; 125.1; 125.4; 125.5; 125.6; 126.3; 126.4; 126.6; 126.9; 127.0; 127.1; 127.4; 127.7; 128.2; 128.3; 129.9; 131.7; 132.1; 132.4; 132.6; 132.9; 133.0; 133.0; 134.1; 136.9; 143.2; 174.5; 201.7; **IR** ( $\nu_{\max}$ , cm<sup>-1</sup>): 1514; 1569; 1683; 1739; 3127 cm<sup>-1</sup>; Anal.Calcd. for C<sub>45</sub>H<sub>41</sub>N<sub>2</sub>O<sub>2</sub>: C, 84.21; H, 6.44; N, 4.36; found: C, 84.17; H, 6.39; N, 4.31.

**2.1.6. (2R, 3S, 4S, 5R) Spiro [2,3']-N-methyloxindole-spiro [3,3']-1''(p-tolyldiene)tetral-2''-one-4-(p-tolyl)pyrrolizidine (4f)**

Yellow oil, (0.30 g; 54%);  $^1\text{H NMR}$  ( $\text{CDCl}_3$ , 400 MHz)  $\delta$  :1.78-1.85 (2m, 2H, H-6<sub>a</sub>/H-7<sub>a</sub>); 2.04-2.18 (2m, 2H, H-6<sub>b</sub>/H-7<sub>b</sub>); 2.13 (d,  $J$ = 15 Hz, 1H, H-4''); 2.25 (s, 3H,  $\text{CH}_3$ ); 2.32 (s, 3H,  $\text{CH}_3$ ); 2.47-2.58 (m, 1H, H-8<sub>a</sub>); 2.75 (s, 3H,  $\text{NCH}_3$ ); 3.27 (d,  $J$ = 15 Hz, 1H, H-4''); 3.30-3.41 (m, 1H, H-8<sub>b</sub>); 4.57 (d,  $J$ = 9 Hz, 1H, H-4); 4.88-4.96 (m, 1H, H-5); 6.12-7.50 (m, 12H,  $\text{H}_{\text{arom}}$ ); 7.69 (s, 1H,  $\text{H}_{\text{ethylenic}}$ );  $^{13}\text{C NMR}$  ( $\text{CDCl}_3$ , 100 MHz)  $\delta$  : 20.5; 20.6; 23.9; 25.2; 27.5; 34.9; 47.7; 54.1; 66.0; 73.6; 106.8; 120.9; 125.3; 126.0; 126.1; 126.5; 128.0; 128.2; 128.4; 128.5; 129.0; 129.3; 129.3; 129.7; 131.8; 131.8; 132.4; 134.1; 134.6; 135.9; 136.9; 138.7; 143.1; 174.7; 201.4; **IR** ( $\nu_{\text{max}}$ ,  $\text{cm}^{-1}$ ): 1493; 1563; 1689; 1715; 2940  $\text{cm}^{-1}$ ; Anal.Calcd. for  $\text{C}_{39}\text{H}_{41}\text{N}_2\text{O}_2$ : C, 82.21; H, 7.25; N, 4.92; found: C, 82.18; H, 7.26; N, 4.94.

**2.1.7. (2*R*, 3*S*, 4*S*, 5*R*) Spiro [2,3']- *N*-methyloxindole-spiro[3,3'']-1''-(*p*-fluorobenzylidene)tétral-2''-one-4-(*p*-fluorobenzyl)pyrrolizidine (4g)**

Yellow oil, (0.32 g; 57%);  $^1\text{H NMR}$  ( $\text{CDCl}_3$ , 400 MHz)  $\delta$  :1.76-1.85 (2m, 2H, H-6<sub>a</sub>/H-7<sub>a</sub>); 2.04-2.12 (2m, 2H, H-6<sub>b</sub>/H-7<sub>b</sub>); 2.13 (d,  $J$ = 15 Hz, 1H, H-4''); 2.48-2.53 (m, 1H, H-8<sub>a</sub>); 2.70 (s, 3H,  $\text{NCH}_3$ ); 3.27 (d,  $J$ = 15 Hz, 1H, H-4''); 3.30-3.39 (m, 1H, H-8<sub>b</sub>); 4.59 (d,  $J$ = 9 Hz, H-4); 4.81-4.89 (m, 1H, H-5); 6.15-7.51 (m, 16H,  $\text{H}_{\text{arom}}$ ); 7.69 (s, 1H,  $\text{H}_{\text{ethylenic}}$ );  $^{13}\text{C NMR}$  ( $\text{CDCl}_3$ , 100 MHz)  $\delta$  : 24.0; 25.1; 27.5; 34.9; 47.2; 53.7; 62.8; 66.2; 73.4; 106.9; 114.5; 114.6; 114.8; 114.9; 120.9; 124.3; 125.5; 126.0; 126.3; 126.4; 128.1; 128.4; 130.8; 130.9; 131.4; 133.0; 133.5; 135.5; 143.2; 163.1; 164.0; 174.6; 201.3; **IR** ( $\nu_{\text{max}}$ ,  $\text{cm}^{-1}$ ): 1495; 1563; 1670; 1729; 2935  $\text{cm}^{-1}$ ; Anal. Calcd. for  $\text{C}_{37}\text{H}_{35}\text{N}_2\text{O}$ : C, 76.93; H, 6.11; F, 6.58; N, 4.85; found: C, 76.89; H, 6.03; F, 6.54; N, 4.81.

**2.1.8. (2*R*, 3*S*, 4*S*, 5*R*) Spiro [2,3'] *N*-methyloxindole-spiro [3,3'']-1''-(*p*-cyanobenzylidene)tétral-2''-one-4-(*p*-cyanobenzyl)pyrrolizidine (4h)**

Yellow powder, (0.20 g; 34%);  $^1\text{H NMR}$  ( $\text{CDCl}_3$ , 400 MHz)  $\delta$  :1.69-1.92 (2m, 2H, H-6<sub>a</sub>/H-7<sub>a</sub>); 1.95-2.08 (2m, 2H, H-6<sub>b</sub>/H-7<sub>b</sub>); 2.18 (d,  $J$ = 15 Hz, 1H, H-4''); 2.48-2.59 (m, 1H, H-8<sub>a</sub>); 2.75 (s, 3H,  $\text{NCH}_3$ ); 3.24-3.37 (m, 1H, H-8<sub>b</sub>); 3.39 (d,  $J$ = 9 Hz, 1H, H-4''); 4.59 (d,  $J$ = 9 Hz, H-4); 4.81-4.92 (m, 1H, H-5); 6.21-7.61 (m, 12H,  $\text{H}_{\text{arom}}$ ); 7.69 (s, 1H,  $\text{H}_{\text{ethylenic}}$ );  $^{13}\text{C NMR}$  ( $\text{CDCl}_3$ , 100 MHz)  $\delta$ : 24.3; 25.6; 28.0; 35.3; 47.5; 54.4; 62.9; 66.5; 73.8; 109.5; 111.1; 112.1; 114.3; 114.8; 118.5; 121.5; 124.7; 126.0; 126.2; 126.4; 127.1; 128.3; 129.2; 129.8; 130.1; 131.3; 131.6; 132.0; 132.2; 135.1; 135.4; 140.2; 175.6; 200.7; **IR** ( $\nu_{\text{max}}$ ,  $\text{cm}^{-1}$ ): 1470; 1592; 1694; 1717; 2219; 2927  $\text{cm}^{-1}$ ; Anal.Calcd. for  $\text{C}_{39}\text{H}_{35}\text{N}_4\text{O}_2$ : C, 79.16; H, 5.96; N, 9.47; found: C, 78.91; H, 5.70; N, 9.35.



**2.1.9. (2*R*, 3*S*, 4*S*, 5*R*) Spiro [2,3'] 5-nitrooxindole-spiro [3,3'']-1''(naphtylidene)tétral-2''-one-4-(naphtyl)pyrrolizidine (4i)**

Yellow powder, (0.34g; 51%); <sup>1</sup>H NMR (CDCl<sub>3</sub>, 400 MHz) δ :1.94-2.08 (2m, 2H, H-6<sub>a</sub>/H-7<sub>a</sub>); 2.10-2.19 (2m, 2H, H-6<sub>b</sub>/H-7<sub>b</sub>); 2.33 (d, *J*= 15 Hz, 1H, H-4''); 2.90-3.16 (m, 1H, H-8<sub>a</sub>); 3.38 (d, *J*= 15 Hz, 1H, H-4''); 3.61-3.78 (m, 1H, H-8<sub>b</sub>); 4.96 (d, *J*= 9 Hz, H-4); 5.30-5.40 (m, 1H, H-5); 6.40-8.11 (m, 12H, H<sub>arom</sub>); 8.16 (s, 1H, H<sub>ethylenic</sub>); <sup>13</sup>C NMR (CDCl<sub>3</sub>, 100 MHz) δ : 24.2; 27.8; 35.2; 48.3; 53.8; 63.5; 66.5; 73.0; 109.3; 123.1; 125.8; 126.0; 126.2; 126.4; 126.5; 126.8; 127.1; 127.3; 127.6; 127.6; 127.9; 128.1; 128.3; 130.1; 130.8; 132.3; 132.4; 132.8; 133.2; 133.4; 133.5; 133.7; 134.3; 139.9; 142.6; 147.1; 176.3; 200.1; **IR** (ν<sub>max</sub>, cm<sup>-1</sup>): 1523; 1588; 1682; 1728; 3125 cm<sup>-1</sup>; Anal. Calcd. for C<sub>44</sub>H<sub>38</sub>N<sub>3</sub>O<sub>4</sub>: C, 78.55; H, 5.69; N, 6.25; found: C, 78.51; H, 5.63; N, 6.22.

**2.1.10. (2*R*, 3*S*, 4*S*, 5*R*) Spiro [2,3'] 5-nitrooxindole-spiro [3,3'']-1''(tolylidene)tétral-2''-one-4-(tolyl)pyrrolizidine (4j)**

Yellow cristal, (0.07 g; 12%); <sup>1</sup>H NMR (CDCl<sub>3</sub>, 400 MHz) δ :1.87-2.08 (2m, 2H, H-6<sub>a</sub>/H-7<sub>a</sub>); 2.14-2.21 (2m, 2H, H-6<sub>b</sub>/H-7<sub>b</sub>); 2.27 (d, *J*= 15 Hz, 1H, H-4''); 2.32 (s, 3H, CH<sub>3</sub>); 2.35 (s, 3H, CH<sub>3</sub>); 2.57-2.75 (m, 1H, H-8<sub>a</sub>); 3.23 (d, *J*= 15 Hz, 1H, H-4''); 3.33-3.38 (m, 1H, H-8<sub>b</sub>); 4.64 (d, *J*= 9 Hz, H-4); 4.85-4.95 (m, 1H, H-5); 6.40-7.92 (m, 16H, H<sub>arom</sub>); 8.05 (s, 1H, H<sub>ethylenic</sub>); 8,17 (s.l, 1H, H<sub>amide</sub>); <sup>13</sup>C NMR (CDCl<sub>3</sub>, 100 MHz) δ : 21.1; 21.4; 24.5; 27.8; 35.1; 47.9; 53.6; 63.8; 66.4; 73.2; 108.9; 123.2; 125.4; 125.7; 126.3; 126.6; 127.6; 127.9; 128.5; 129.1; 129.3; 129.6; 129.7; 130.0; 130.2; 130.6; 131.7; 131.9; 132.7; 134.0; 136.9; 139.8; 142.5; 147.0; 177.2; 200.2; **IR** (ν<sub>max</sub>, cm<sup>-1</sup>): 1522; 1590; 1682; 1724; 2923 cm<sup>-1</sup>; Anal. Calcd. for C<sub>38</sub>H<sub>38</sub>N<sub>3</sub>O<sub>4</sub>: C, 75.98; H, 6.38; N, 6.99; found: C, 75.93; H, 6.32; N, 6.94.

**2.1.11. (2*R*, 3*S*, 4*S*, 5*R*) Spiro [2,3'] 5-nitrooxindole-spiro [3,3'']-1''(*p*-fluorobenzylidene)tétral-2''-one-4-(*p*-fluorobenzyl)pyrrolizidine (4k)**

Yellow cristal, (0.06 g; 11%); <sup>1</sup>H NMR (CDCl<sub>3</sub>, 400 MHz) δ :1.72-1.97 (2m, 2H, H-6<sub>a</sub>/H-7<sub>a</sub>); 2.00-2.16 (2m, 2H, H-6<sub>b</sub>/H-7<sub>b</sub>); 2.20 (d, *J*= 15 Hz, 1H, H-4''); 2.45-2.58 (m, 1H, H-8<sub>a</sub>); 3.20 (d, *J*= 15 Hz, 1H, H-4''); 3.17-3.22 (m, 1H, H-8<sub>b</sub>); 4.61 (d, *J*= 9 Hz, H-4); 4.68-4.79 (m, 1H, H-5); 6.41-7.93 (m, 15H, H<sub>arom</sub>); 8.03 (s, 1H, H<sub>ethylenic</sub>) 8.34 (s, 1H, H<sub>amide</sub>); <sup>13</sup>C NMR (CDCl<sub>3</sub>, 100 MHz) δ : 24.0; 27.7; 35.1; 48.1; 53.1; 60.3; 66.8; 72.8; 115.5; 115.8; 122.8; 126.2; 126.7; 128.3; 128.4; 130.2; 130.7; 131.3; 131.5; 131.6; 132.1; 138.7; 142.7; 161.5; 164.8; 171.0;

199.8; **IR** ( $\nu_{\max}$ ,  $\text{cm}^{-1}$ ): 1510; 1589; 1670; 1738; 2925 ; Anal. Calcd. for  $\text{C}_{36}\text{H}_{32}\text{F}_2\text{N}_3\text{O}_4$ : C, 71.04; H, 5.30; F, 6.24; N, 6.90; found: C, 71.00; H, 5.28; F, 6.20; N, 6.85.

**2.1.12. (2R, 3S, 4R, 5S) Spiro [2,3'] oxindole-spiro [3,3'']-1''-(naphtylidene)tetral-2''-one-4-(naphthyl)pyrrolizidine (5a)**

Yellow oil, (0.06 g; 11%);  **$^1\text{H}$  NMR** ( $\text{CDCl}_3$ , 400 MHz)  $\delta$  :1.79-1.89 (2m, 2H, H-6<sub>a</sub>/H-7<sub>a</sub>); 1.91-2.19 (2m, 2H, H-6<sub>b</sub>/H-7<sub>b</sub>); 2.26 (d,  $J$ = 15 Hz, 1H, H-4''); 2.50-2.65 (m, 1H, H-8<sub>a</sub>); 3.34-3.45 (m, 1H, H-8<sub>b</sub>), 3.51 (d,  $J$ = 15 Hz, 1H, H-4''); 4.85 (d,  $J$ = 9 Hz, H-4); 4.96-5.11 (m, 1H, H-5); 6.19-7.98 (m, 22H, H<sub>arom</sub>); 8.01 (s, 1H, H<sub>ethylenic</sub>);  **$^{13}\text{C}$  NMR** ( $\text{CDCl}_3$ , 100 MHz)  $\delta$  : 24.3; 27.6; 34.8; 47.0; 54.2; 63.9; 65.7; 73.5; 108.4; 110.9; 111.9; 117.7; 118.0; 122.3; 125.4; 126.1; 126.4; 128.2; 128.3; 129.2; 129.9; 130.1; 130.7; 131.7; 131.9; 133.3; 133.8; 136.3; 139.2; 142.2; 142.6; 146.4; 176.2; 199.9; **IR** ( $\nu_{\max}$ ,  $\text{cm}^{-1}$ ): 1482; 1590; 1691; 1725; 2229; 2929 ; Anal. Calcd. for  $\text{C}_{44}\text{H}_{39}\text{N}_2\text{O}_2$ : C, 84.18; H, 6.26; N, 4.46; found: C, 84.12; H, 6.28; N, 4.44.

**2.1.13. (2R, 3S, 4R, 5S) Spiro [2,3'] oxindole-spiro [3,3'']-1''-(tolylidene)tetral-2''-one-4-(tolyl)pyrrolizidine (5b)**

Yellow oil, (0.05 g; 9%);  **$^1\text{H}$  NMR** ( $\text{CDCl}_3$ , 400 MHz)  $\delta$  :1.74-1.96 (2m, 2H, H-6<sub>a</sub>/H-7<sub>a</sub>); 2.06-2.18 (2m, 2H, H-6<sub>b</sub>/H-7<sub>b</sub>); 2.24 (s, 3H,  $\text{CH}_3$ ); 2.25 (d,  $J$ = 15 Hz, 1H, H-4''); 2.29 (s, 3H,  $\text{CH}_3$ ); 2.52-2.61 (m, 1H, H-8<sub>a</sub>); 3.37 (d,  $J$ = 15 Hz, 1H, H-4''); 3.35-3.42 (m, 1H, H-8<sub>b</sub>); 4.62 (d,  $J$ = 9 Hz, 1H, H-4); 4.83-4.94 (m, 1H, H-5); 6.29-7.43 (m, 16H, H<sub>arom</sub>); 7.72 (s, 1H, H<sub>ethylenic</sub>);  **$^{13}\text{C}$  NMR** ( $\text{CDCl}_3$ , 100 MHz)  $\delta$  : 20.3; 20.6; 24.2; 27.7; 34.8; 47.6; 54.0; 63.3; 66.0; 73.9; 108.9; 121.1; 125.5; 125.6; 126.1; 126.7; 128.0; 128.1; 128.4; 128.6; 129.0; 129.3; 129.9; 131.9; 132.0; 132.2; 132.5; 133.6; 134.5; 135.9; 136.7; 138.6; 141.1; 177.5; 201.5; **IR** ( $\nu_{\max}$ ,  $\text{cm}^{-1}$ ): 1513; 1579; 1684; 1730; 2973  $\text{cm}^{-1}$ ; Anal. Calcd. for  $\text{C}_{38}\text{H}_{39}\text{N}_2\text{O}_2$ : C, 82.13; H, 7.07; N, 5.04; found: C, 82.10; H, 7.03; N, 5.06.

**2.1.14. (2R, 3S, 4R, 5S) Spiro [2,3'] oxindole-spiro [3,3'']-1''-(*p*-fluorobenzylidene)tetral-2''-one-4-(*p*-fluorobenzyl)pyrrolizidine (5c)**

Yellow powder, (0.05g; 9%);  **$^1\text{H}$  NMR** ( $\text{CDCl}_3$ , 400 MHz)  $\delta$  :1.76-1.94 (2m, 2H, H-6<sub>a</sub>/H-7<sub>a</sub>); 2.09-2.18 (2m, 2H, H-6<sub>b</sub>/H-7<sub>b</sub>); 2.23 (d,  $J$ = 15 Hz, 1H, H-4''); 2.54-2.66 (m, 1H, H-8<sub>a</sub>); 3.34 (d,  $J$ = 15 Hz, 1H, H-4''); 3.30-3.49 (m, 1H, H-8<sub>b</sub>); 4.56 (d,  $J$ = 12 Hz, H-4); 4.78-4.89 (m, 1H, H-5); 6.29-7.55 (m, 16H, H<sub>arom</sub>); 7.66 (s, 1H, H<sub>ethylenic</sub>); 7.95 (s.l, 1H, H<sub>amide</sub>);  **$^{13}\text{C}$  NMR**

(CDCl<sub>3</sub>, 100 MHz)  $\delta$  : 24.5; 27.8; 34.7; 47.2; 53.6; 63.1; 66.3; 73.8; 108.9; 114.6; 114.7; 114.9; 120.9; 124.7; 125.4; 125.8; 126.8; 127.2; 128.1; 129.5; 130.8; 131.0; 131.7; 132.8; 133.1; 133.3; 135.7; 140.7; 163.2; 164.3; 176.8; 200.9; **IR** ( $\nu_{\max}$ , cm<sup>-1</sup>): 1518; 1594; 1697; 1711; 2991cm<sup>-1</sup>; Anal. Calcd. for C<sub>36</sub>H<sub>33</sub>F<sub>2</sub>N<sub>2</sub>O<sub>2</sub>: C, 76.71 ; H, 5.90; F, 6.74; N, 4.97; found: C, 76.70; H, 5.94; F, 6.70; N, 4.93.

**2.1.15. (2*R*, 3*S*, 4*R*, 5*S*) Spiro [2,3'] oxindole-spiro [3,3'']-1''-(*p*-cyanobenzylidene)tetral-2''-one-4-(*p*-cyanobenzyl)pyrrolizidine (5d)**

Yellow powder, (0.05 g; 9%); <sup>1</sup>H NMR (CDCl<sub>3</sub>, 400 MHz)  $\delta$  :1.75-1.93 (2m, 2H, H-6<sub>a</sub>/H-7<sub>a</sub>); 1.84-1.98 (2m, 2H, H-6<sub>b</sub>/H-7<sub>b</sub>); 2.14 (d, *J*= 15 Hz, 1H, H-4''); 2.55-2.60 (m, 1H, H-8<sub>a</sub>); 3.27 (d, *J*= 9 Hz, 1H, H-4''); 3.32-3.35 (m, 1H, H-8<sub>b</sub>); 4.61 (d, *J*= 9 Hz, H-4); 4.83-4.87 (m, 1H, H-5); 6.22-7.69 (m, 16H, H<sub>arom</sub>); 7.67 (s, 1H, H<sub>ethylenic</sub>); <sup>13</sup>C NMR (CDCl<sub>3</sub>, 100 MHz)  $\delta$  : 24.8; 28.0; 35.2 ; 47.8; 54.4; 62.8; 66.2; 73.8; 108.9; 111.2; 112.1; 118.2; 121.4; 125.8; 127.2; 128.6; 129.2; 129.6; 130.1; 130.4; 131.5; 131.6; 132.1; 132.2; 135.2; 135.3; 140.2; 140.8; 144.0; 179.2; 200.7; **IR** ( $\nu_{\max}$ , cm<sup>-1</sup>): 1496; 1587; 1694; 1718; 2224; 2928 cm<sup>-1</sup>; Anal. Calcd. for C<sub>38</sub>H<sub>33</sub>N<sub>4</sub>O<sub>2</sub>: C, 79.00; H, 5.76; N, 9.70; found: C, 78.96; H, 5.71; N, 9.74.

**2.1.16. (2*R*, 3*S*, 4*R*, 5*S*) Spiro [2,3'] *N*-methyloxindole-spiro [3,3'']-1''-(naphtylidene)tetral-2''-one-4-(naphtyl)pyrrolizidine (5e)**

Yellow powder, (0.07 g; 12%); <sup>1</sup>H NMR (CDCl<sub>3</sub>, 400 MHz)  $\delta$  :1.80-1.92 (2m, 2H, H-6<sub>a</sub>/H-7<sub>a</sub>); 2.05-2.16 (2m, 2H, H-6<sub>b</sub>/H-7<sub>b</sub>); 2.20 (d, *J*= 15 Hz, 1H, H-4''); 2.56-2.66 (m, 1H, H-8<sub>a</sub>); 2.79 (s, 3H, CH<sub>3</sub>); 3.40 (d, *J*= 15 Hz, 1H, H-4''); 3.43-3.56 (m, 1H, H-8<sub>b</sub>); 4.86 (d, *J*= 9 Hz, H-4); 5.12-5.18 (m, 1H, H-5); 6.15-7.91 (m, 22H, H<sub>arom</sub>); 7.98 (s, 1H, H<sub>ethylenic</sub>); <sup>13</sup>C NMR (CDCl<sub>3</sub>, 100 MHz)  $\delta$  : 23.8; 25.4; 27.7; 34.9; 47.8; 54.3; 65.8; 73.6; 106.9; 121.1; 125.2; 125.5; 125.6; 125.8; 126.2; 126.3; 126.5; 126.7; 126.9; 127.3; 127.4; 127.7; 128.1; 128.2; 130.0; 131.6; 132.2; 132.4; 132.6; 132.9; 133.1; 133.2; 134.1; 136.8; 143.4; 175.6; 201.8; **IR** ( $\nu_{\max}$ , cm<sup>-1</sup>): 1521; 1579; 1680; 1742; 3134 cm<sup>-1</sup>; Anal. Calcd. for C<sub>45</sub>H<sub>41</sub>N<sub>2</sub>O<sub>2</sub>: C, 84.21; H, 6.44; N, 4.36; found: C, 84.16; H, 6.40; N, 4.32.

**2.1.17. (2*R*, 3*S*, 4*R*, 5*S*) Spiro [2,3'] *N*-methyloxindole-spiro [3,3'']-1''-(Tolyldiene)tetral-2''-one-4-(*p*-tolyl)pyrrolizidine (5f)**

Yellow powder, (0.07 g; 13%);  $^1\text{H NMR}$  ( $\text{CDCl}_3$ , 400 MHz)  $\delta$  :1.69-1.86 (2m, 2H, H-6<sub>a</sub>/H-7<sub>a</sub>); 2.08-2.17 (2m, 2H, H-6<sub>b</sub>/H-7<sub>b</sub>); 2.14 (d,  $J=15$  Hz, 1H, H-4''); 2.27 (s, 3H,  $\text{CH}_3$ ); 2.34 (s, 3H,  $\text{CH}_3$ ); 2.51-2.58 (m, 1H, H-8<sub>a</sub>); 2.76 (s, 3H,  $\text{NCH}_3$ ); 3.27 (d,  $J=15$  Hz, 1H, H-4''); 3.28-3.30 (m, 1H, H-8<sub>b</sub>); 4.61 (d,  $J=9$  Hz, 1H, H-4); 4.90-4.98 (m, 1H, H-5); 6.15-7.40 (m, 16H,  $\text{H}_{\text{arom}}$ ); 7.72 (s, 1H,  $\text{H}_{\text{olefinic}}$ );  $^{13}\text{C NMR}$  ( $\text{CDCl}_3$ , 100 MHz)  $\delta$  :20.8; 20.9; 24.2; 25.4; 27.6; 34.8; 47.9; 54.2; 66.1; 73.5; 107.0, 121.0; 125.4; 126.0; 126.1; 126.3; 127.9; 128.3; 128.5; 128.7; 129.1; 129.3; 129.5; 129.7; 130.9; 131.5; 132.4; 134.1; 134.5; 135.4; 136.7; 138.9; 143.2; 179.9; 201.5; **IR** ( $\nu_{\text{max}}$ ,  $\text{cm}^{-1}$ ): 1509;1563; 1691; 1699; 2945  $\text{cm}^{-1}$ ; Anal. Calcd. for  $\text{C}_{39}\text{H}_{41}\text{N}_2\text{O}_2$ : C, 82.21; H, 7.25; N, 4.92; found: C, 82.18; H, 7.27; N, 4.97.

**2.1.18. (2R, 3S, 4R, 5S) Spiro [2,3'] N-methyloxindole-spiro [3,3'']-1''-(p-fluorobenzylidene)tetral-2''-one-4-(p-fluorobenzyl)pyrrolizidine (5g)**

Yellow oil, (0.06 g; 12%);  $^1\text{H NMR}$  ( $\text{CDCl}_3$ , 400 MHz)  $\delta$  :1.77-1.82 (2m, 2H, H-6<sub>a</sub>/H-7<sub>a</sub>); 2.09-2.13 (2m, 2H, H-6<sub>b</sub>/H-7<sub>b</sub>); 2.15 (d,  $J=15$  Hz, 1H, H-4''); 2.49-2.59 (m, 1H, H-8<sub>a</sub>); 2.77 (s, 3H,  $\text{NCH}_3$ ); 3.30 (d,  $J=15$  Hz, 1H, H-4''); 3.29-3.39 (m, 1H, H-8<sub>b</sub>); 4.60 (d,  $J=9$  Hz, H-4); 4.82-4.88 (m, 1H, H-5); 6.18-7.60 (m, 12H,  $\text{H}_{\text{arom}}$ ); 7.70 (s, 1H,  $\text{H}_{\text{ethylenic}}$ );  $^{13}\text{C NMR}$  ( $\text{CDCl}_3$ , 100 MHz)  $\delta$  : 24.2; 25.4; 27.8; 34.9; 47.2; 54.1; 63.1; 66.3; 73.2; 107.5; 114.2; 114.6; 114.8; 118.0; 120.9; 121.9; 124.5; 125.7; 126.1; 126.8; 127.9; 128.6; 129.8; 130.4;130.8; 131.5; 132.8; 133.3;133.4; 134.1; 135.4; 143.2; 160.0; 161.2; 163.3; 164.0;174.8; 200.7; **IR** ( $\nu_{\text{max}}$ ,  $\text{cm}^{-1}$ ): 1502; 1583; 1675; 1722; 2937; Anal. Calcd. for  $\text{C}_{37}\text{H}_{35}\text{F}_2\text{N}_2\text{O}$ : C, 76.93; H, 6.11; F, 6.58; N, 4.85; found: C, 76.88; H, 6.10; F, 6.55; N, 4.87.

**2.1.19. (2R, 3S, 4R, 5S) Spiro [2,3'] N-methyloxindole-spiro [3,3'']-1''-(p-cyanobenzylidene)tetral-2''-one-4-(p-cyanobenzyl)pyrrolizidine (5h)**

Yellow powder, (0.05 g; 9%);  $^1\text{H NMR}$  ( $\text{CDCl}_3$ , 400 MHz)  $\delta$  :1.76-1.92 (2m, 2H, H-6<sub>a</sub>/H-7<sub>a</sub>); 1.93-2.10 (2m, 2H, H-6<sub>b</sub>/H-7<sub>b</sub>); 2.18 (d,  $J=15$  Hz, 1H, H-4''); 2.54-2.64 (m, 1H, H-8<sub>a</sub>); 2.76 (s, 3H,  $\text{NCH}_3$ ); 3.25-3.38 (m, 1H, H-8<sub>b</sub>); 3.41 (d,  $J=15$  Hz, 1H, H-4''); 4.60 (d,  $J=9$  Hz, H-4); 4.80-4.94 (m, 1H, H-5); 6.23-7.64 (m, 12H,  $\text{H}_{\text{arom}}$ ); 7.67 (s, 1H,  $\text{H}_{\text{ethylenic}}$ );  $^{13}\text{C NMR}$  ( $\text{CDCl}_3$ , 100 MHz)  $\delta$  : 24.2; 25.5; 28.1; 35.4; 47.6; 54.3; 62.9; 66.5; 73.8; 109.8; 111.5; 112.3; 114.5; 114.8; 117.9; 118.6; 120.9; 124.8; 126.0; 126.3; 126.7; 127.2; 128.4; 129.3; 129.6; 129.9; 130.5; 131.2; 131.7; 132.3; 135.3; 135.6; 140.5; 175.9; 200.6; **IR** ( $\nu_{\text{max}}$ ,  $\text{cm}^{-1}$ ): 1510; 1587; 1689; 1693; 2219; 2967 $\text{cm}^{-1}$ ; Anal. Calcd. for  $\text{C}_{39}\text{H}_{35}\text{N}_4\text{O}_2$ : C, 79.16; H, 5.96; N, 9.47; found: C, 79.09; H, 5.90; N,9.41.

**2.1.20. (2*R*, 3*S*, 4*R*, 5*S*) Spiro [2,3'] 5-nitrooxindole-spiro [3,3'']-1''-(naphthylidene)tetral-2''-one-4-(naphthyl)pyrrolizidine (5i)**

Yellow powder, (0.07 g; 11%); <sup>1</sup>H NMR (CDCl<sub>3</sub>, 400 MHz) δ :1.94-2.04 (2m, 2H, H-6<sub>a</sub>/H-7<sub>a</sub>); 2.12-2.17 (2m, 2H, H-6<sub>b</sub>/H-7<sub>b</sub>); 2.36 (d, *J*= 15 Hz, 1H, H-4''); 2.72-3.17 (m, 1H, H-8<sub>a</sub>); 3.38 (d, *J*= 15 Hz, 1H, H-4''); 3.64-3.74 (m, 1H, H-8<sub>b</sub>); 4.99 (d, *J*= 9 Hz, H-4); 5.31-5.42 (m, 1H, H-5); 6.41-8.05 (m, 12H, H<sub>arom</sub>); 8.20 (s, 1H, H<sub>ethylenic</sub>); <sup>13</sup>C NMR (CDCl<sub>3</sub>, 100 MHz) δ : 24.4; 27.8; 35.3; 48.2; 53.9; 63.4; 66.2; 73.2; 108.9; 123.7; 125.8; 126.1; 126.4; 126.7; 126.8; 127.0; 127.2; 127.4; 127.6; 127.8; 128.0; 128.5; 129.2; 130.3; 131.2; 132.2; 132.4; 132.6; 133.1; 133.4; 133.7; 133.9; 134.2; 139.8; 142.4; 147.0; 176.4; 200.3; **IR (ν<sub>max</sub>, cm<sup>-1</sup>):** 1516; 1580; 1664; 1738; 3299 ; Anal.Calcd.for C<sub>44</sub>H<sub>38</sub>N<sub>3</sub>O<sub>4</sub>: C, 78.55; H, 5.69; N, 6.25; found: C, 78.52; H, 5.65; N, 6.21.

**2.1.21. (2*R*, 3*S*, 4*R*, 5*S*) Spiro [2,3'] 5-nitrooxindole-spiro [3,3'']-1''-(tolylidene)tetral-2''-one-4-(tolyl)pyrrolizidine (5j)**

Yellow powder, (0.33 g; 55%); <sup>1</sup>H NMR (CDCl<sub>3</sub>, 400 MHz) δ :1.88-2.05 (2m, 2H, H-6<sub>a</sub>/H-7<sub>a</sub>); 2.14-2.21 (2m, 2H, H-6<sub>b</sub>/H-7<sub>b</sub>); 2.28 (d, *J*= 15 Hz, 1H, H-4''); 2.31 (s, 3H, CH<sub>3</sub>); 2.35 (s, 3H, CH<sub>3</sub>); 2.51-2.72 (m, 1H, H-8<sub>a</sub>); 3.24 (d, *J*= 15 Hz, 1H, H-4''); 3.30-3.46 (m, 1H, H-8<sub>b</sub>); 4.66 (d, *J*= 9 Hz, H-4); 4.87-4.95 (m, 1H, H-5); 6.41-7.91 (m, 16H, H<sub>arom</sub>); 8.07 (s, 1H, H<sub>ethylenic</sub>); <sup>13</sup>C NMR (CDCl<sub>3</sub>, 100 MHz) δ : 20.6; 20.8; 24.1; 27.3; 34.7; 47.1; 53.2; 63.5; 66.8; 72.2; 108.5; 122.7; 125.1; 125.5; 125.7; 126.2; 127.5; 128.6; 128.7; 129.2; 129.3; 129.5; 130.1; 131.2; 131.5; 132.0; 133.5; 136.3; 139.1; 142.3; 146.7; 175.9; 200.0; **IR (ν<sub>max</sub>, cm<sup>-1</sup>):** 1524; 1591; 1683; 1728; 2975; Anal. Calcd.for C<sub>38</sub>H<sub>38</sub>N<sub>3</sub>O<sub>4</sub>: C, 75.98; H, 6.38; N, 6.99; found: C, 75.96; H, 6.39; N, 6.89.

**2.1.22. (2*R*, 3*S*, 4*R*, 5*S*) Spiro [2,3'] 5-nitrooxindole-spiro [3,3'']-1''-(*p*-fluorobenzylidene)tetral-2''-one-4-(*p*-fluorobenzyl)pyrrolizidine (5k)**

Yellow powder, (0.35 g; 58%); <sup>1</sup>H NMR (CDCl<sub>3</sub>, 400 MHz) δ :1.72-1.93 (2m, 2H, H-6<sub>a</sub>/H-7<sub>a</sub>); 2.02-2.11 (2m, 2H, H-6<sub>b</sub>/H-7<sub>b</sub>); 2.21 (d, *J*= 15 Hz, 1H, H-4''); 2.42-2.50 (m, 1H, H-8<sub>a</sub>); 3.20 (d, *J*= 15 Hz, 1H, H-4''); 3.22-3.39 (m, 1H, H-8<sub>b</sub>); 4.60 (d, *J*= 9 Hz, H-4); 4.68-4.79 (m, 1H, H-5); 6.49-7.94 (m, 16H, H<sub>arom</sub>); 8.06 (s, 1H, H<sub>ethylenic</sub>); 8.36 (s.l, 1H, H<sub>amide</sub>); <sup>13</sup>C NMR (CDCl<sub>3</sub>, 100 MHz) δ : 24.4; 27.5; 34.4; 47.9; 52.8; 61.7; 66.1; 72.6; 115.0; 115.8; 122.6; 125.1; 126.0; 127.3; 129.6; 130.4; 130.6; 131.1; 131.8; 131.9; 132.2; 132.5; 138.6; 142.1; 161.8; 164.2; 173.4; 200.1; **IR (ν<sub>max</sub>, cm<sup>-1</sup>):** 1505; 1579; 1677; 1733; 2938 cm<sup>-1</sup>;

Anal.Calcd.for C<sub>36</sub>H<sub>32</sub>F<sub>2</sub>N<sub>3</sub>O<sub>4</sub>: C, 71.04; H, 5.30; F, 6.24; N, 6.90; found: C, 71.08; H, 5.25; F, 6.21; N, 6.94.

**2.2.1. (2*R*, 3*S*, 4*S*, 5*R*) Spiro [2,3'] oxindole-spiro [3,3'']-1''-(*p*-fluorobenzylidene)tétral-2''-one-4-(*p*-fluorobenzyl)-5-isopropylpyrrole (16a)**

Yellow oil, (0.29g; 52%); <sup>1</sup>H NMR (CDCl<sub>3</sub>, 400 MHz) δ :1.09 (d, *J*= 3 Hz, CH(CH<sub>3</sub>)<sub>2</sub>); 1.25 (d, *J*= 3 Hz, CH(CH<sub>3</sub>)<sub>2</sub>); 1.88 (sept, 1H, CH(CH<sub>3</sub>)<sub>2</sub>); 2.27 (d, *J*= 15 Hz, 1H, H-4''); 2.38-2.85 (s.l, 1H, NH); 2.93 (d, *J*= 15 Hz, 1H, H-4''); 4.23 (t, 1H, H-5); 4.32 (d, *J*= 9 Hz, H-4); 6.20-7.49 (m, 16H, H<sub>arom</sub>); 7.59 (s, 1H, H<sub>ethylenic</sub>); 7.81 (s, 1H, H<sub>amide</sub>); <sup>13</sup>C NMR (CDCl<sub>3</sub>, 100 MHz) δ : 19.4; 20.8; 26.9; 32.3; 35.2; 55.6; 60.2; 68.2; 72.9; 109.2; 114.7; 114.9; 115.2; 121.9; 123.1; 126.1; 126.3; 127.4; 128.7; 128.8; 129.2; 130.0; 131.0; 131.5; 131.6; 132.0; 132.1; 134.0; 135.5; 140.3; 163.1; 163.3; 163.5; 163.9; 177.9; 211.9; IR (ν<sub>max</sub>, cm<sup>-1</sup>): 1521; 1594; 1690; 1719; 2990 ; Anal.Calcd.for C<sub>36</sub>H<sub>35</sub>F<sub>2</sub>N<sub>2</sub>O<sub>2</sub>: C, 76.44; H, 6.24; F, 6.72; N, 4.95; found: C, 76.39; H, 5.94; F, 6.68; N, 4.90.

**2.2.2. (2*R*, 3*S*, 4*S*, 5*R*) Spiro [2,3'] *N*-methyloxindole-spiro [3,3'']-1''-(*p*-fluorobenzylidene) tétral-2''-one-4-(*p*-fluorobenzyl)-5-isopropylpyrrole (16b)**

Yellow oil, (0.31 g; 54%); <sup>1</sup>H NMR (CDCl<sub>3</sub>, 400 MHz) δ :1.10 (d, *J*= 3 Hz, CH(CH<sub>3</sub>)<sub>2</sub>); 1.28 (d, *J*= 3 Hz, CH(CH<sub>3</sub>)<sub>2</sub>); 1.92 (sept, 1H, CH(CH<sub>3</sub>)<sub>2</sub>); 2.30 (d, *J*= 15 Hz, 1H, H-4''); 2.39-2.76 (s.l, 1H, NH); 2.75 (s, 3H, NCH<sub>3</sub>); 2.97 (d, *J*= 15 Hz, 1H, H-4''); 4.20 (t, 1H, H-5); 4.35 (d, *J*= 9 Hz, H-4); 6.18-7.51 (m, 16H, H<sub>arom</sub>); 7.61 (s, 1H, H<sub>ethylenic</sub>); 7.80 (s, 1H, H<sub>amide</sub>); <sup>13</sup>C NMR (CDCl<sub>3</sub>, 100 MHz) δ : 19.2; 20.6; 24.9; 26.7; 32.5; 35.4; 55.4; 60.4; 68.5; 72.8; 108.8; 114.5; 114.8; 115.1; 121.7; 122.8; 126.3; 126.5; 127.6; 128.9; 130.1; 129.4; 130.2; 131.3; 131.4; 131.8; 132.2; 132.0; 133.9; 135.2; 140.4; 163.0; 163.2; 163.4; 163.6; 177.5; 210.6; IR (ν<sub>max</sub>, cm<sup>-1</sup>): 1492; 1562; 1669; 1722; 2930; Anal. Calcd. for C<sub>37</sub>H<sub>38</sub>F<sub>2</sub>N<sub>2</sub>O<sub>2</sub>: C, 76.53; H, 6.60; F, 6.54; N, 4.82; found: C, 76.51; H, 6.57; F, 6.52; N, 4.80.

**2.2.3. (2*R*, 3*S*, 4*S*, 5*R*) Spiro [2,3'] 5-nitroxindole-spiro [3,3'']-1''-(*p*-fluorobenzylidene)tétral-2''-one-4-(*p*-fluorobenzyl)-5-isopropylpyrrole (16c)**

Yellow oil, (0.05g; 9%); <sup>1</sup>H NMR (CDCl<sub>3</sub>, 400 MHz) δ : 1.11 (d, *J*= 3 Hz, CH(CH<sub>3</sub>)<sub>2</sub>); 1.29 (d, *J*= 3 Hz, CH(CH<sub>3</sub>)<sub>2</sub>); 1.94 (sept, 1H, CH(CH<sub>3</sub>)<sub>2</sub>); 2.29 (d, *J*= 15 Hz, 1H, H-4''); 2.39-2.89 (s.l, 1H, NH); 2.95 (d, *J*= 15 Hz, 1H, H-4''); 4.25 (t, 1H, H-5); 4.33 (d, *J*= 9 Hz, H-4); 6.21-7.51 (m, 16H, H<sub>arom</sub>); 7.60 (s, 1H, H<sub>ethylenic</sub>); 7.80 (s, 1H, H<sub>amide</sub>); <sup>13</sup>C NMR (CDCl<sub>3</sub>, 100

MHz)  $\delta$ : 20.1; 20.9; 27.1; 33.4; 35.7; 55.8; 60.2; 69.1; 73.4; 109.8; 115.2; 115.2; 115.5; 122.3; 123.8; 126.5; 126.8; 127.9; 128.5; 128.8; 129.7; 130.2; 131.4; 131.8; 131.9; 132.3; 132.6; 134.3; 135.7; 141.5; 163.3; 163.5; 163.7; 163.9; 177.6; 212.3; **IR** ( $\nu_{\max}$ ,  $\text{cm}^{-1}$ ): 1510; 1579; 1681; 1739; 2931; Anal. Calcd. for  $\text{C}_{36}\text{H}_{34}\text{F}_2\text{N}_3\text{O}_4$ : C, 70.81; H, 5.61; F, 6.22; N, 6.88; found: C, 70.78; H, 5.59; F, 6.20; N, 6.84.

#### **2.2.4. (2R, 3S, 4R, 5S) Spiro [2,3'] oxindole-spiro [3,3'']-1''-(p-fluorobenzylidene)tetral-2''-one-4-(p-fluorobenzyl)-5-isopropylpyrrole (17a)**

Yellow oil, (0.05g; 10%);  $^1\text{H NMR}$  ( $\text{CDCl}_3$ , 400 MHz)  $\delta$ : 1.08 (d,  $J=3$  Hz,  $\text{CH}(\underline{\text{CH}_3})_2$ ); 1.24 (d,  $J=3$  Hz,  $\text{CH}(\underline{\text{CH}_3})_2$ ); 1.90 (sept, 1H,  $\text{CH}(\underline{\text{CH}_3})_2$ ); 2.27 (d,  $J=15$  Hz, 1H, H-4''); 2.39-2.75 (s.l, 1H, NH); 2.92 (d,  $J=15$  Hz, 1H, H-4''); 4.23 (t, 1H, H-5); 4.33 (d,  $J=9$  Hz, H-4); 6.19-7.72 (m, 16H,  $\text{H}_{\text{arom}}$ ); 7.57 (s, 1H,  $\text{H}_{\text{ethylenic}}$ ); 7.75 (s, 1H,  $\text{H}_{\text{amide}}$ );  $^{13}\text{C NMR}$  ( $\text{CDCl}_3$ , 100 MHz)  $\delta$ : 20.1; 21.3; 27.0; 32.3; 35.5; 55.1; 60.0; 67.8; 72.9; 109.3; 114.7; 115.1; 115.5; 120.8; 122.6; 123.4; 125.0; 126.2; 127.3; 128.5; 128.7; 128.9; 129.1; 130.2; 131.0; 131.4; 131.5; 131.9; 132.2; 132.5; 132.7; 132.9; 133.6; 133.9; 134.3; 135.8; 140.6; 163.0; 163.2; 163.4; 163.8; 176.5; 209.7; **IR** ( $\nu_{\max}$ ,  $\text{cm}^{-1}$ ): 1517; 1596; 1692; 1723; 2987; Anal. Calcd. for  $\text{C}_{36}\text{H}_{35}\text{F}_2\text{N}_2\text{O}_2$ : C, 76.44; H, 6.24; F, 6.72; N, 4.95; found: C, 76.40; H, 6.22; F, 6.69; N, 4.93.

#### **2.2.5. (2R, 3S, 4R, 5S) Spiro [2,3'] N-methyloxindole-spiro [3,3'']-1''-(p-fluorobenzylidene)tetral-2''-one-4-(p-fluorobenzyl)-5-isopropylpyrrole (17b)**

Yellow oil, (0.07 g; 12%);  $^1\text{H NMR}$  ( $\text{CDCl}_3$ , 400 MHz)  $\delta$ : 1.08 (d,  $J=3$  Hz,  $\text{CH}(\underline{\text{CH}_3})_2$ ); 1.26 (d,  $J=3$  Hz,  $\text{CH}(\underline{\text{CH}_3})_2$ ); 1.91 (sept, 1H,  $\text{CH}(\underline{\text{CH}_3})_2$ ); 2.28 (d,  $J=15$  Hz, 1H, H-4''); 2.40-2.73 (s.l, 1H, NH); 2.76 (s, 3H,  $\text{NCH}_3$ ); 2.95 (d,  $J=15$  Hz, 1H, H-4''); 4.19 (t, 1H, H-5); 4.36 (d,  $J=9$  Hz, H-4); 6.19-7.53 (m, 16H,  $\text{H}_{\text{arom}}$ ); 7.60 (s, 1H,  $\text{H}_{\text{ethylenic}}$ ); 7.79 (s, 1H,  $\text{H}_{\text{amide}}$ );  $^{13}\text{C NMR}$  ( $\text{CDCl}_3$ , 100 MHz)  $\delta$ : 19.9; 20.8; 24.5; 26.3; 32.8; 35.6; 55.7; 60.8; 68.7; 72.6; 109.8; 114.2; 114.6; 115.2; 121.5; 122.9; 126.4; 126.3; 127.5; 128.8; 130.2; 129.2; 130.4; 131.6; 131.2; 131.5; 132.0; 132.2; 133.6; 135.0; 140.3; 163.1; 163.3; 163.5; 163.7; 176.8; 210.2; **IR** ( $\nu_{\max}$ ,  $\text{cm}^{-1}$ ): 1492; 1562; 1669; 1722; 2930; Anal. Calcd. for  $\text{C}_{37}\text{H}_{38}\text{F}_2\text{N}_2\text{O}_2$ : C, 76.53; H, 6.60; F, 6.54; N, 4.82; found: C, 76.50; H, 6.54; F, 6.50; N, 4.77.

#### **2.2.6. (2R, 3S, 4R, 5S) Spiro [2,3'] 5-nitroxindole-spiro [3,3'']-1''-(p-fluorobenzylidene)tetral-2''-one-4-(p-fluorobenzyl)-5-isopropylpyrrole (17c)**

Yellow oil, (0.29 g; 49%);  $^1\text{H NMR}$  ( $\text{CDCl}_3$ , 400 MHz)  $\delta$ : 1.12 (d,  $J = 3$  Hz,  $\text{CH}(\text{CH}_3)_2$ ); 1.28 (d,  $J = 3$  Hz,  $\text{CH}(\text{CH}_3)_2$ ); 1.93 (sept, 1H,  $\text{CH}(\text{CH}_3)_2$ ); 2.30 (d,  $J = 15$  Hz, 1H, H-4''); 2.38-2.90 (s.l, 1H, NH); 2.94 (d,  $J = 15$  Hz, 1H, H-4''); 4.26 (t, 1H, H-5); 4.32 (d,  $J = 9$  Hz, H-4); 6.20-7.53 (m, 16H,  $\text{H}_{\text{arom}}$ ); 7.61 (s, 1H,  $\text{H}_{\text{ethylenic}}$ ); 7.81 (s, 1H,  $\text{H}_{\text{amide}}$ );  $^{13}\text{C NMR}$  ( $\text{CDCl}_3$ , 100 MHz)  $\delta$ : 20.2; 20.9; 27.4; 33.2; 35.7; 55.7; 60.4; 69.3; 73.7; 110.5; 115.5; 115.9; 116.3; 122.7; 124.1; 126.4; 126.8; 128.0; 128.5; 128.9; 129.5; 131.2; 131.4; 131.7; 132.0; 132.4; 132.6; 135.0; 135.7; 142.2; 163.2; 163.4; 163.6; 163.8; 176.9; 211.0; **IR** ( $\nu_{\text{max}}$ ,  $\text{cm}^{-1}$ ): 1512; 1573; 1680; 1727; 2938 ; Anal.Calcd.for  $\text{C}_{36}\text{H}_{34}\text{F}_2\text{N}_3\text{O}_4$ : C, 70.81; H, 5.61; F, 6.22; N, 6.88; found: C, 70.78; H, 5.59; F, 6.18; N, 6.85.

### $^1\text{H}$ AND $^{13}\text{C}$ NMR SPECTRA

**Fig S1.**  $^1\text{H NMR}$  spectrum of **4a** in  $\text{CDCl}_3$

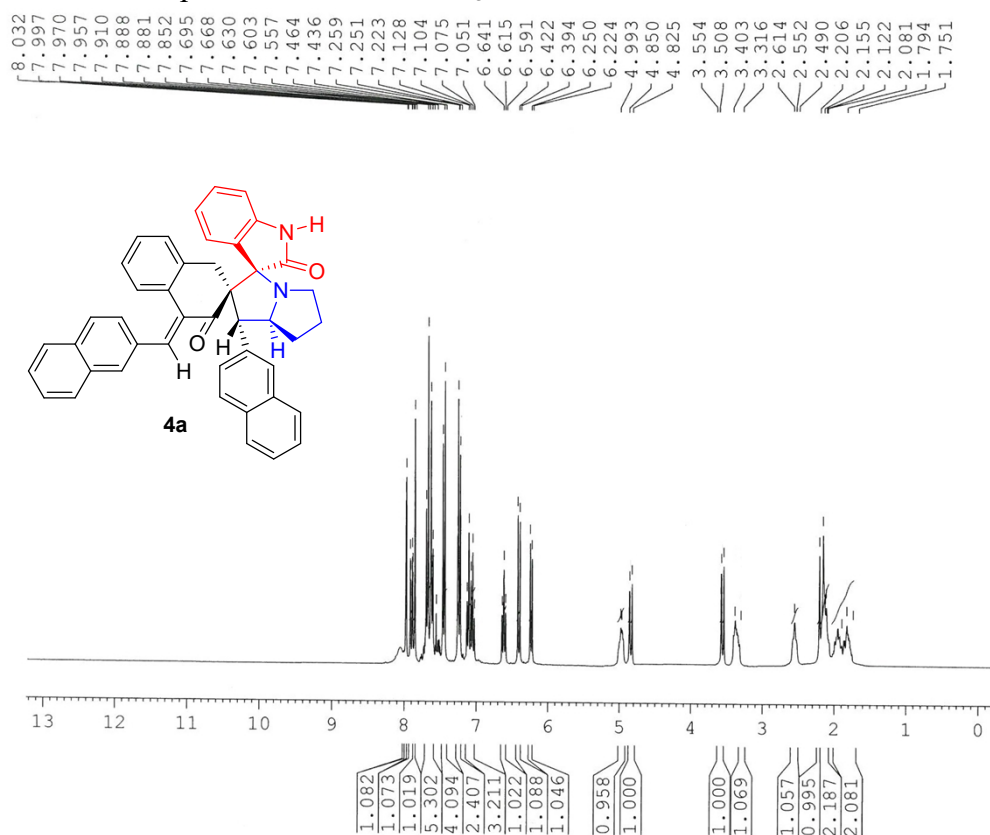

**Fig S2.**  $^{13}\text{C}$   $\{^1\text{H}\}$  NMR spectrum of **4a** in  $\text{CDCl}_3$



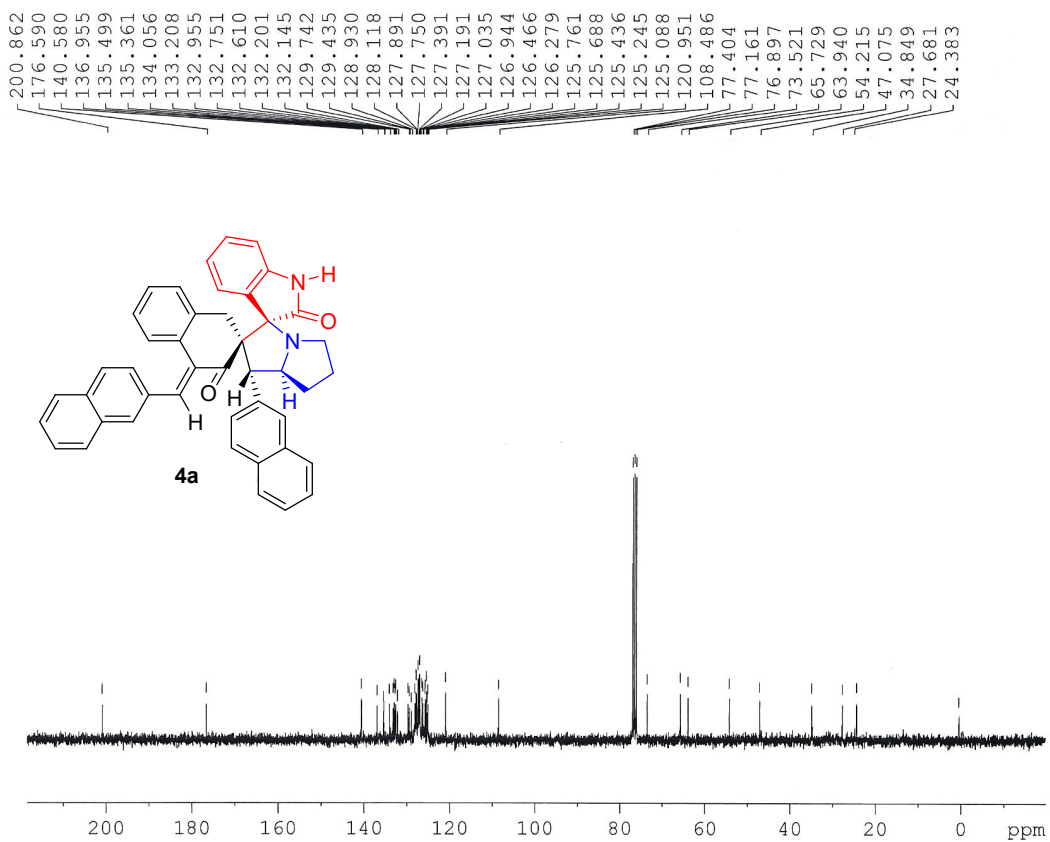

Fig S3.  $^1\text{H}$  NMR Spectrum of **4b** in  $\text{CDCl}_3$

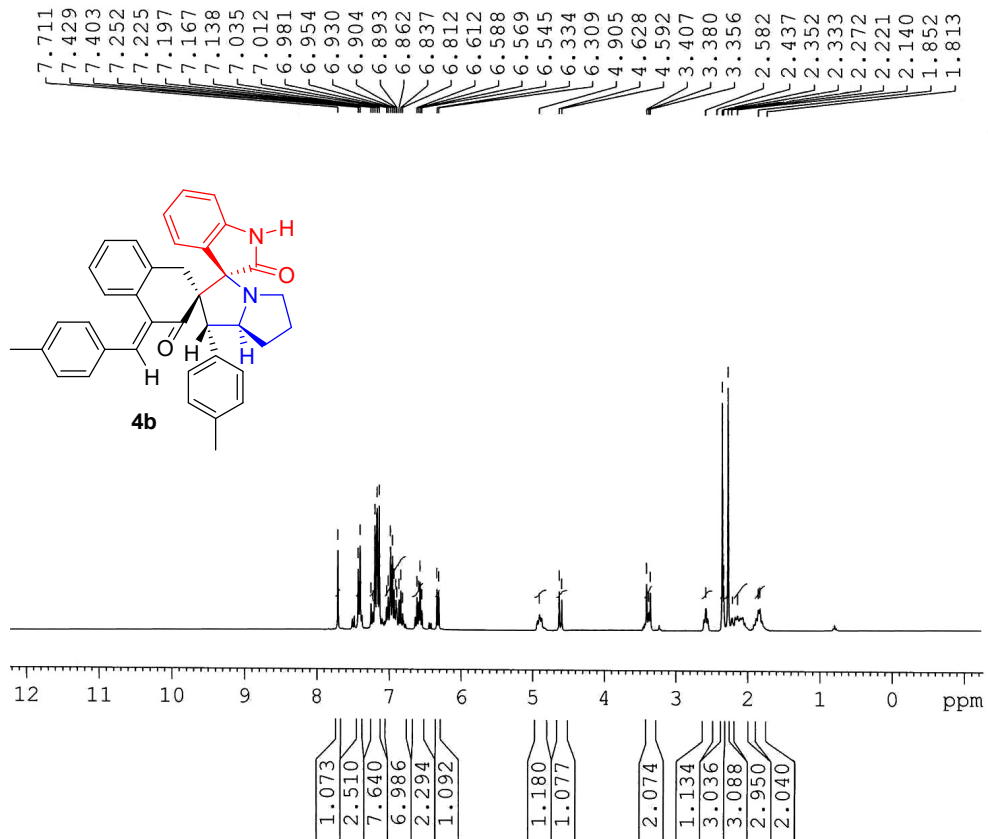

Fig S4.  $^{13}\text{C}$   $\{^1\text{H}\}$  NMR spectrum of **4b** in  $\text{CDCl}_3$

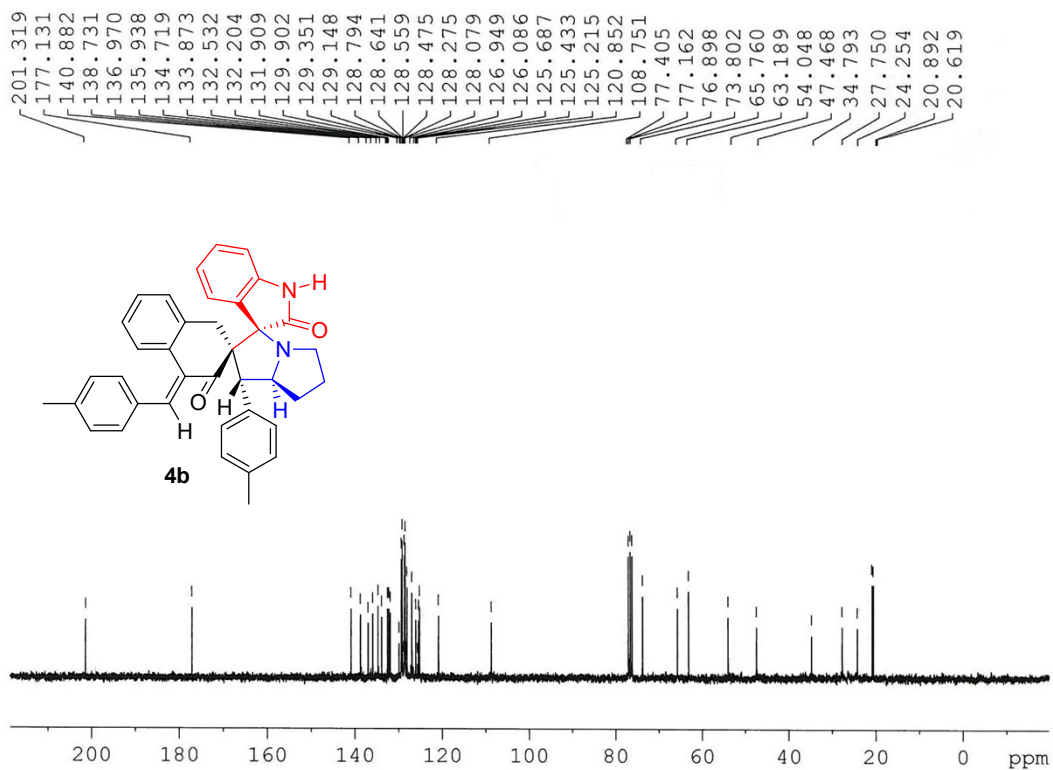

Fig S5.  $^1\text{H}$  NMR Spectrum of **4c** in  $\text{CDCl}_3$

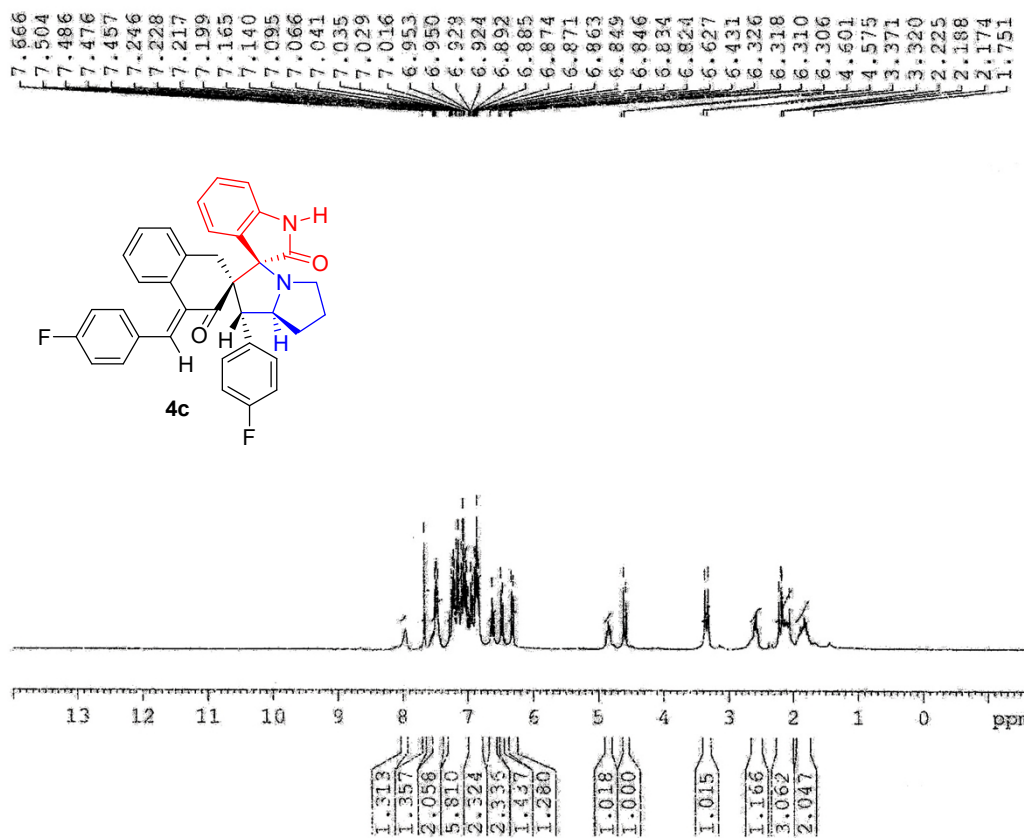

Fig S6.  $^{13}\text{C}$   $\{^1\text{H}\}$  NMR Spectrum of **4c** in  $\text{CDCl}_3$

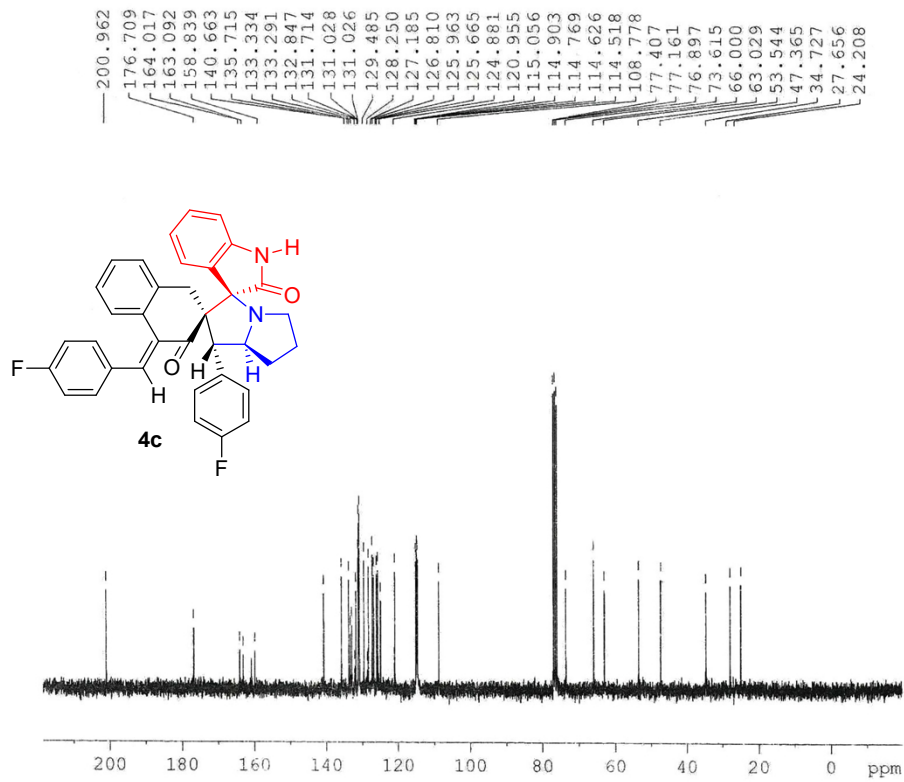

**Fig S7.**  $^1\text{H}$  NMR Spectrum of **4d** in  $\text{CDCl}_3$

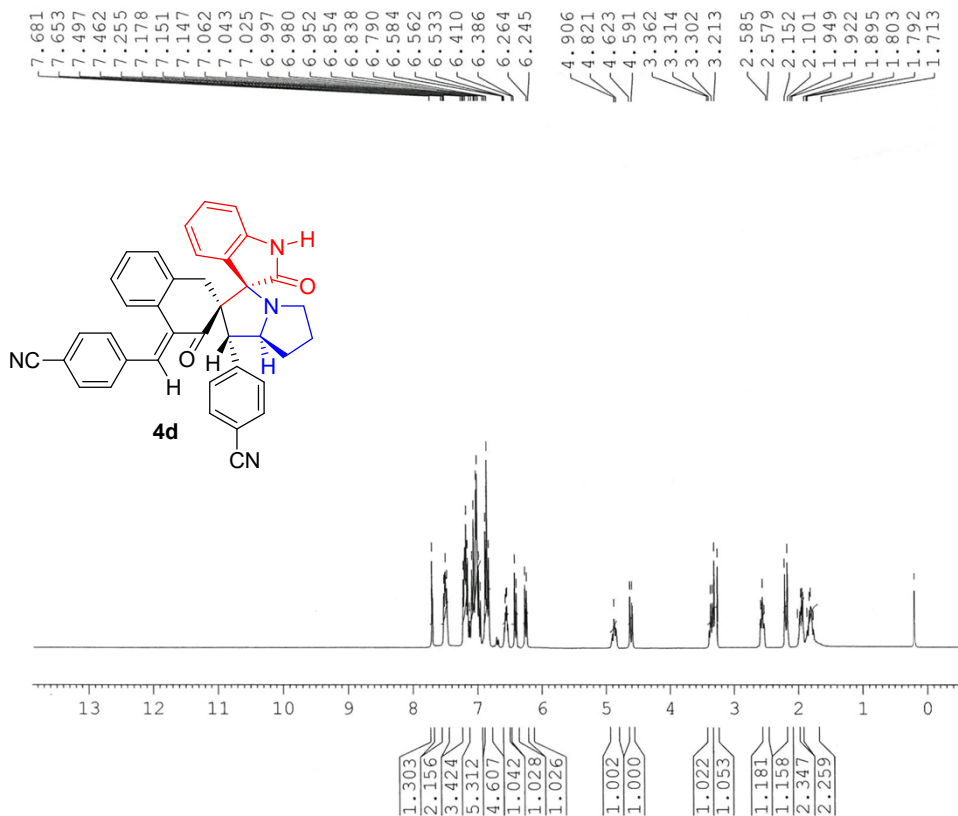

**Fig S8.**  $^{13}\text{C}$   $\{^1\text{H}\}$  NMR Spectrum of **4d** in  $\text{CDCl}_3$

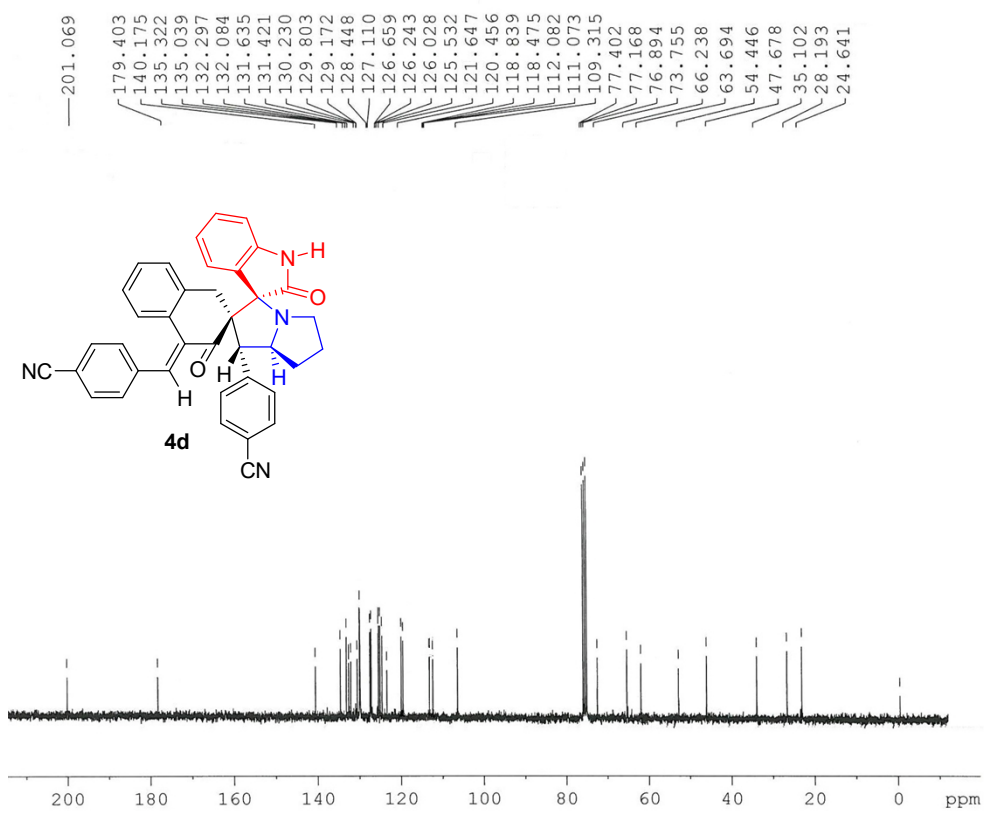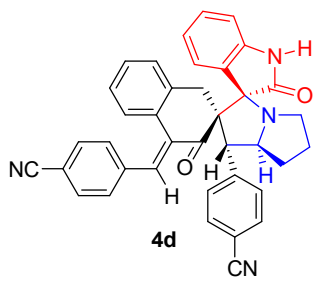

**Fig S9.** <sup>1</sup>H NMR Spectrum of **4e** in CDCl<sub>3</sub>

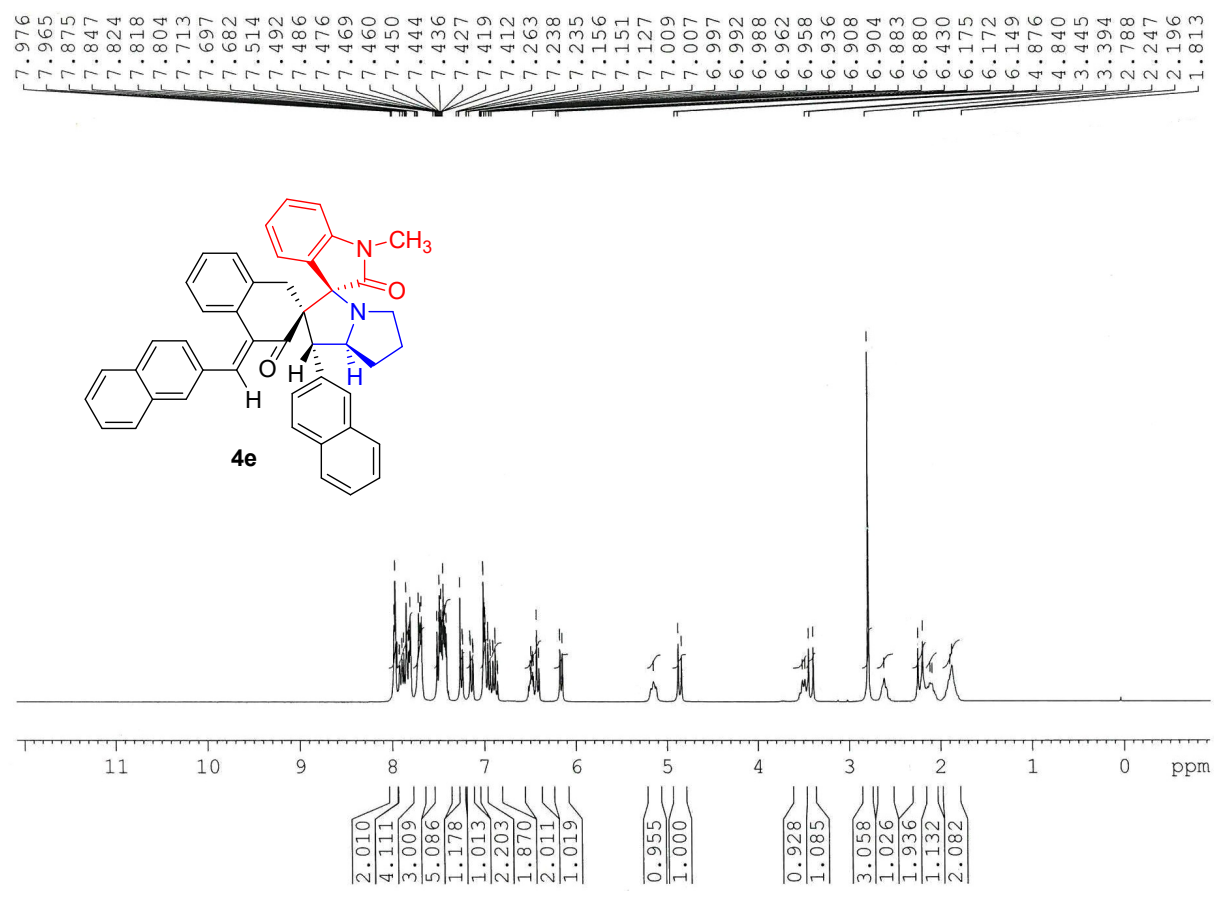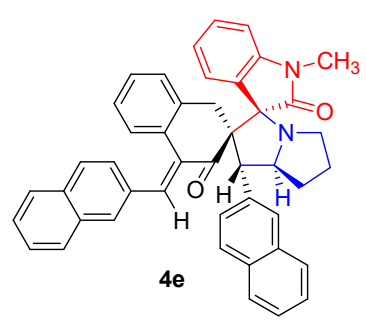

**Fig S10.**  $^{13}\text{C}$   $\{^1\text{H}\}$  NMR Spectrum of **4e** in  $\text{CDCl}_3$

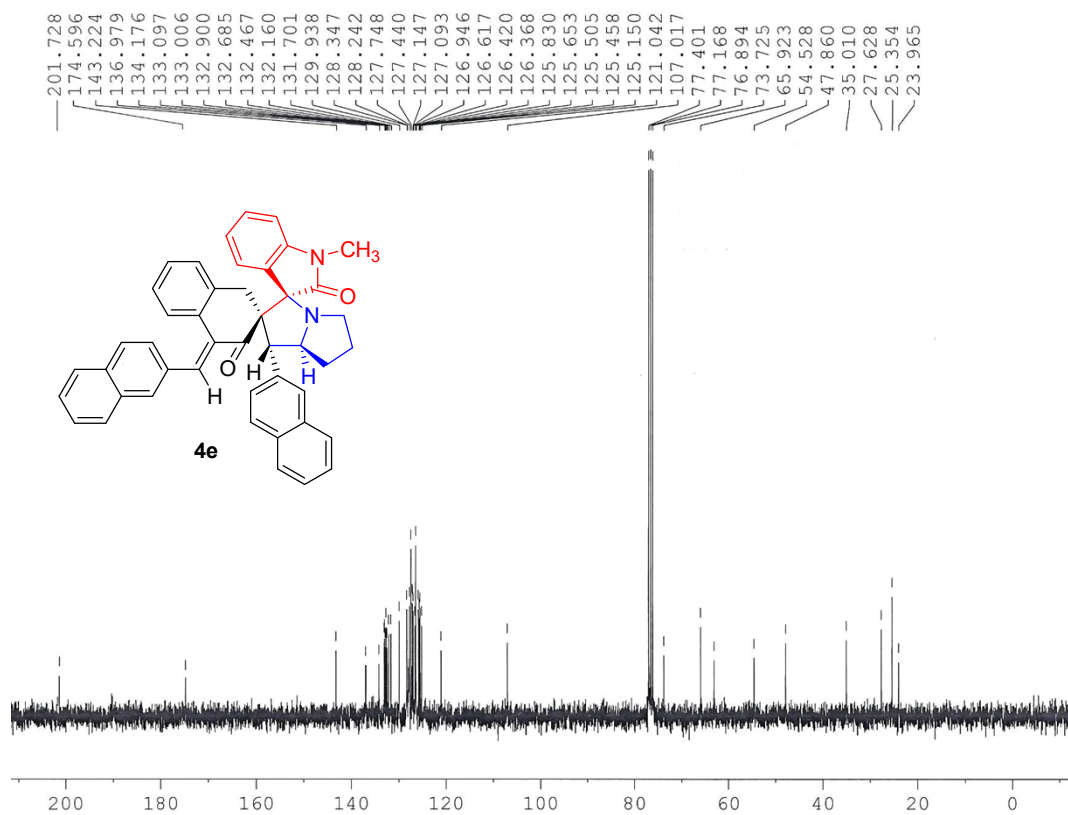

**Fig S11.**  $^1\text{H}$  NMR Spectrum of **4f** in  $\text{CDCl}_3$

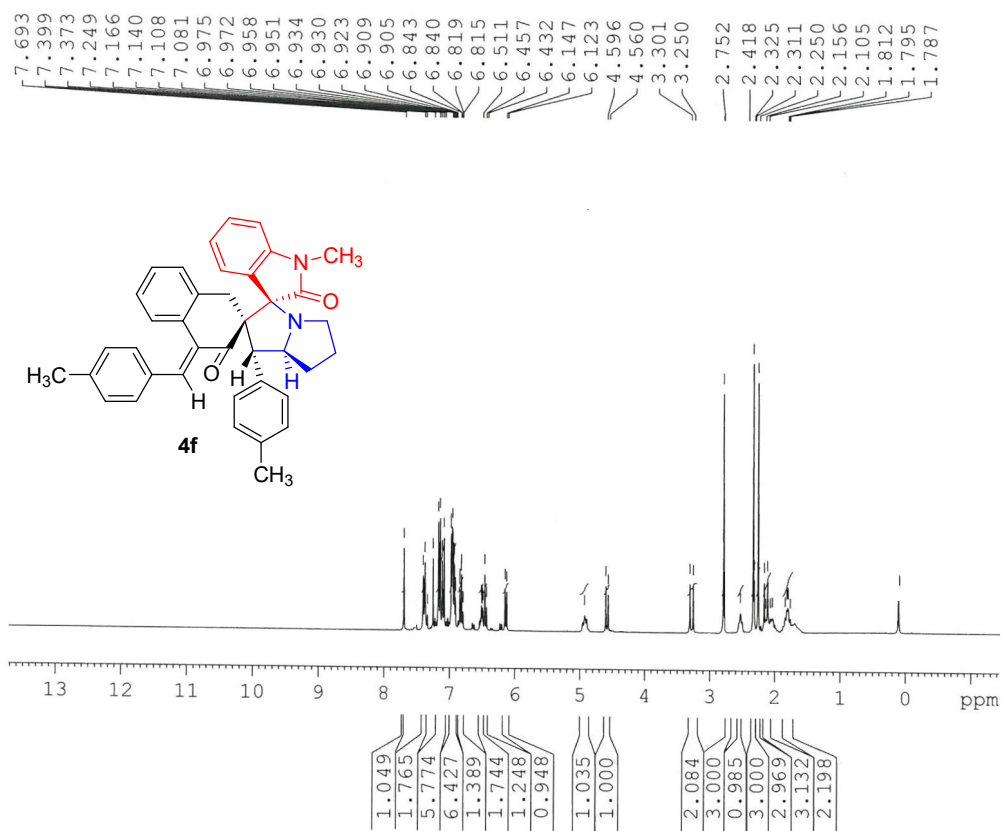

**Fig S12.**  $^{13}\text{C}$   $\{^1\text{H}\}$  NMR Spectrum of **4f** in  $\text{CDCl}_3$

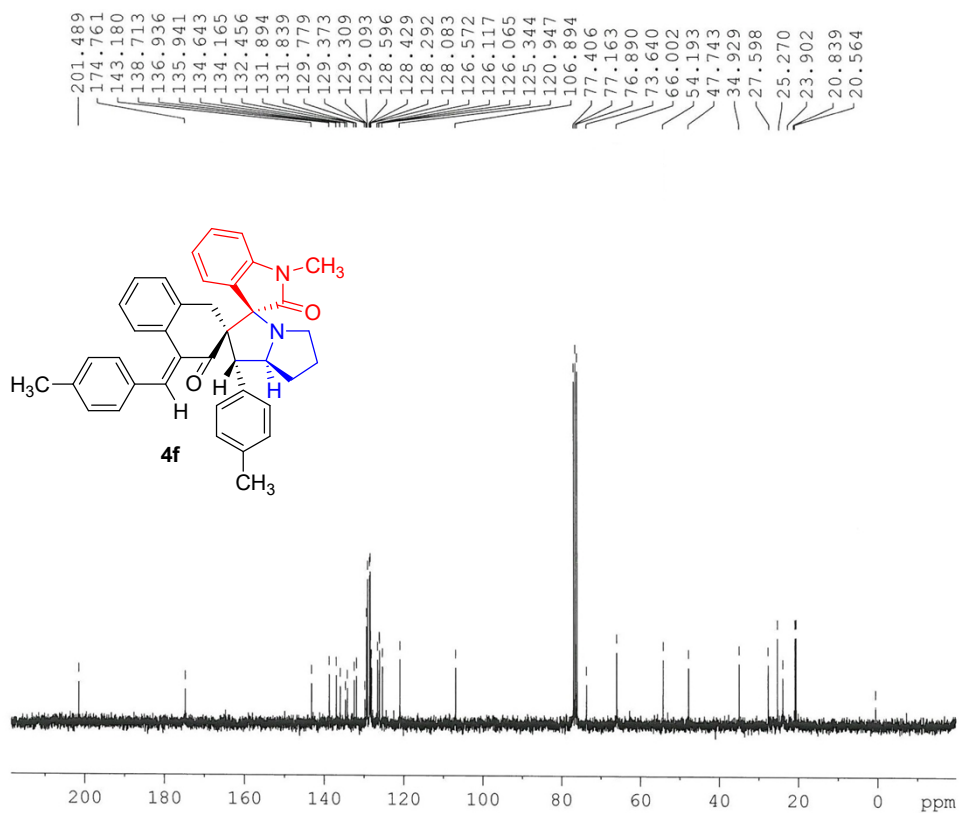

**Fig S13.**  $^1\text{H}$  NMR Spectrum of **4g** in  $\text{CDCl}_3$

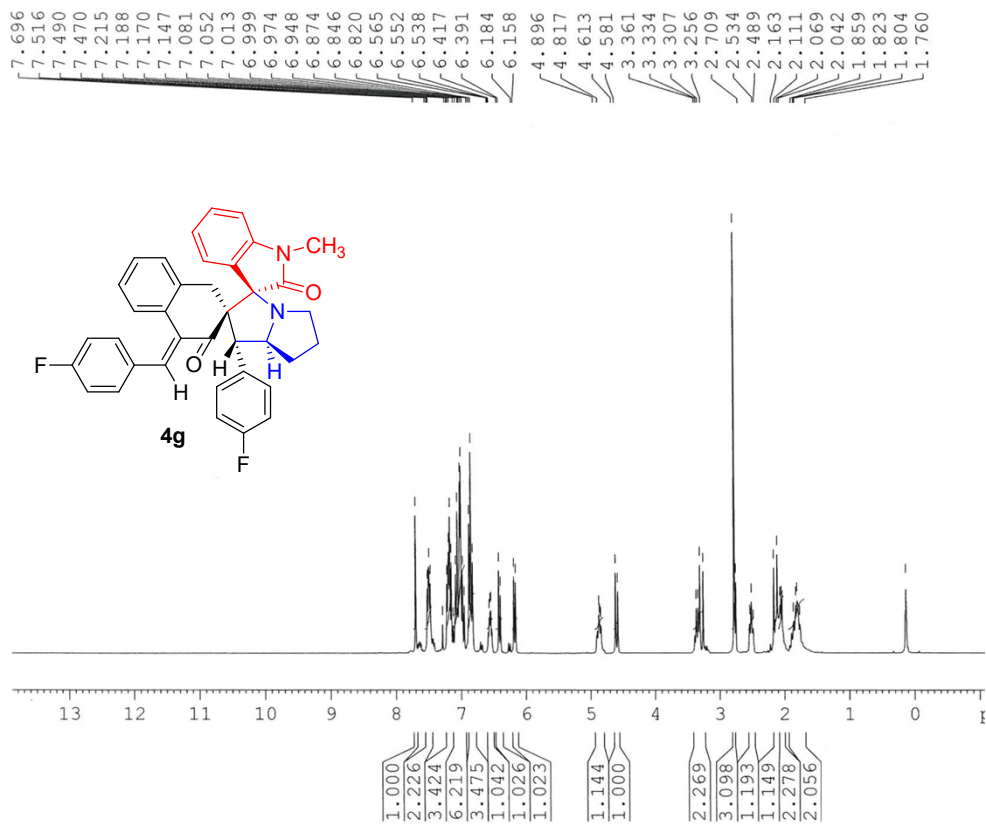

**Fig S14.** <sup>13</sup>C {<sup>1</sup>H} NMR Spectrum of **4g** in CDCl<sub>3</sub>

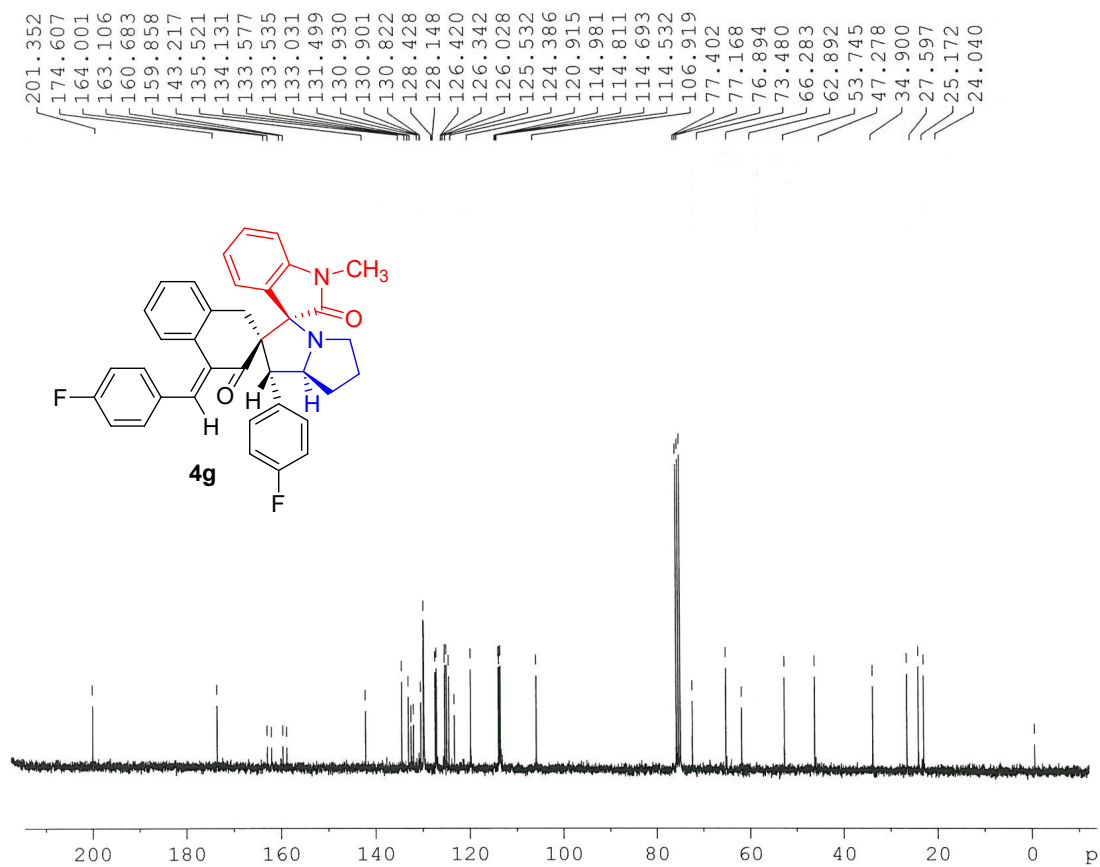



**Fig S15.**  $^1\text{H}$  NMR Spectrum of **4h** in  $\text{CDCl}_3$

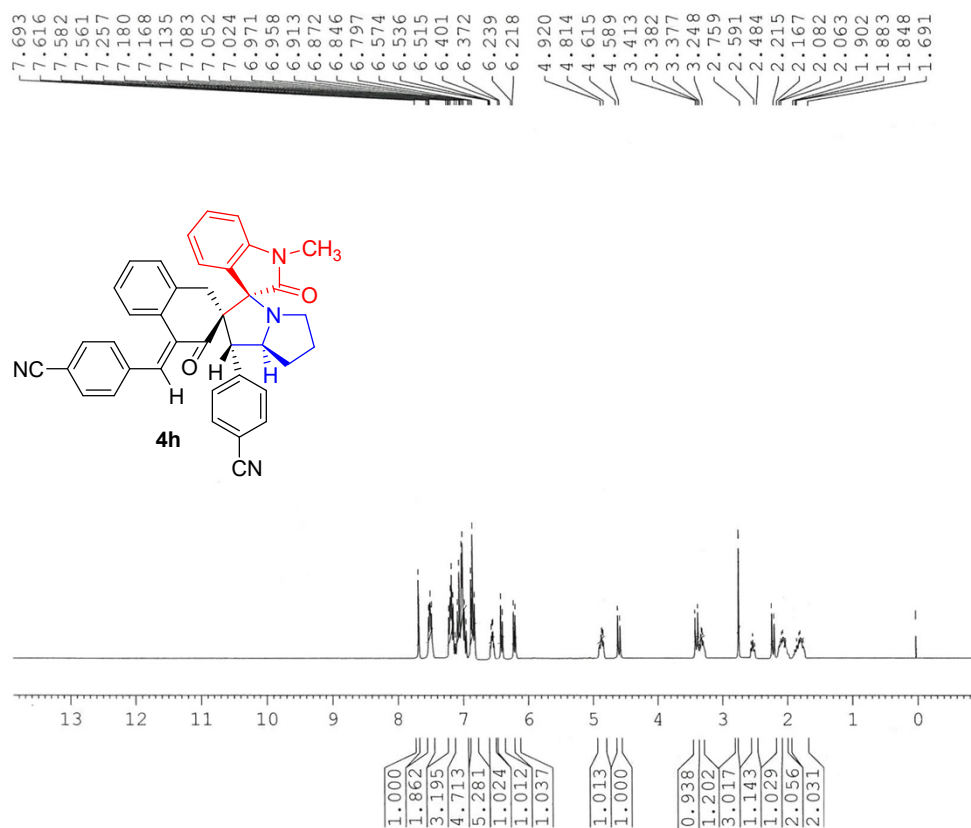

**Fig S16.**  $^{13}\text{C}$   $\{^1\text{H}\}$  NMR Spectrum of **4h** in  $\text{CDCl}_3$



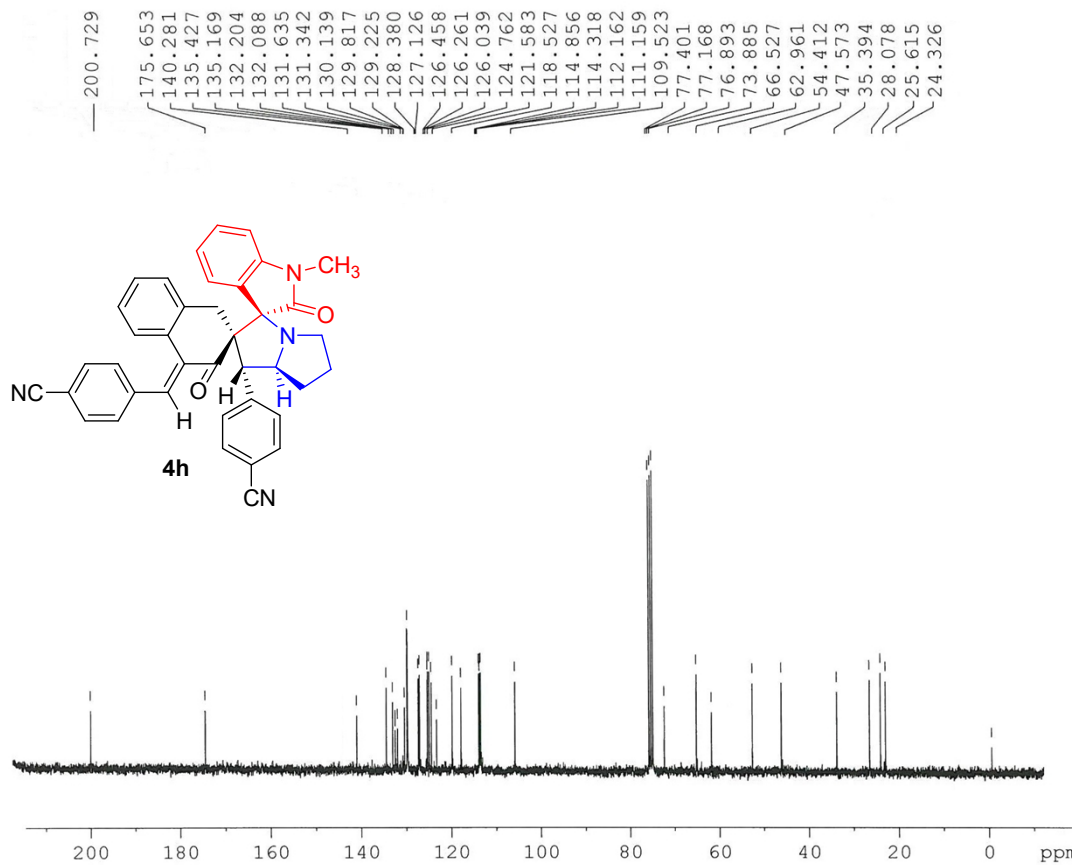

**Fig S17.**  $^1\text{H}$  NMR Spectrum of **4i** in  $\text{CDCl}_3$

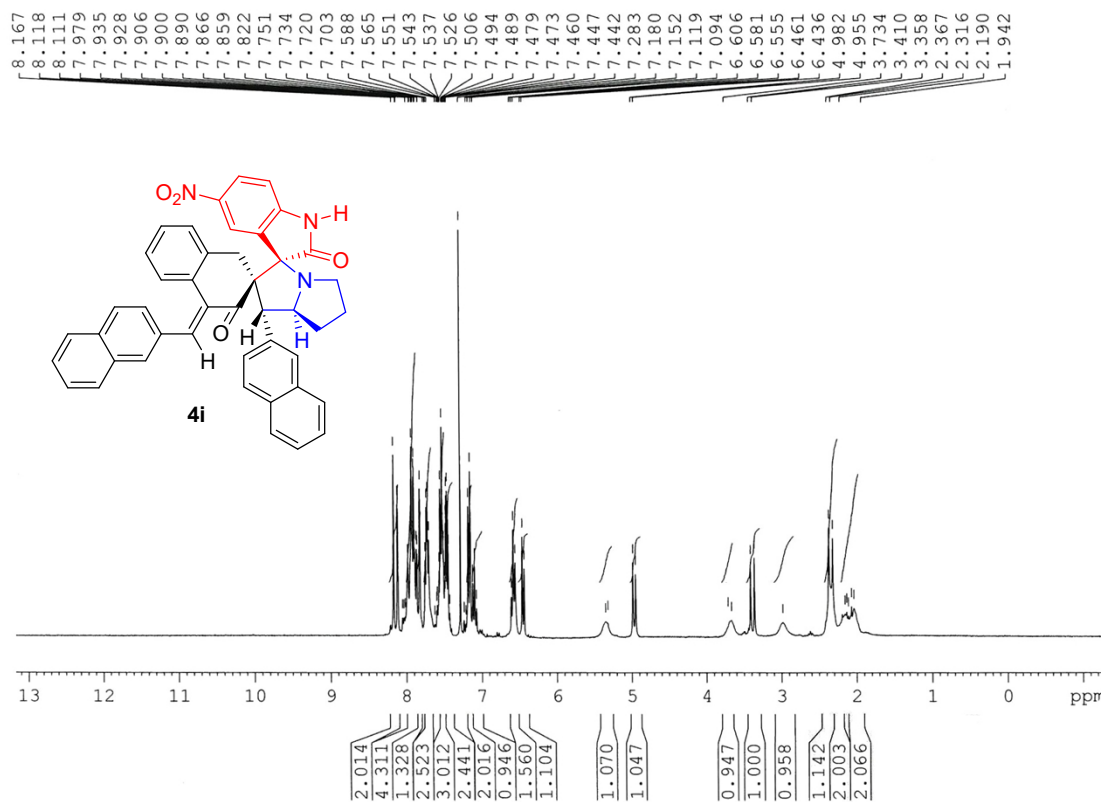

**Fig S18.**  $^{13}\text{C}$   $\{^1\text{H}\}$  NMR Spectrum of **4i** in  $\text{CDCl}_3$

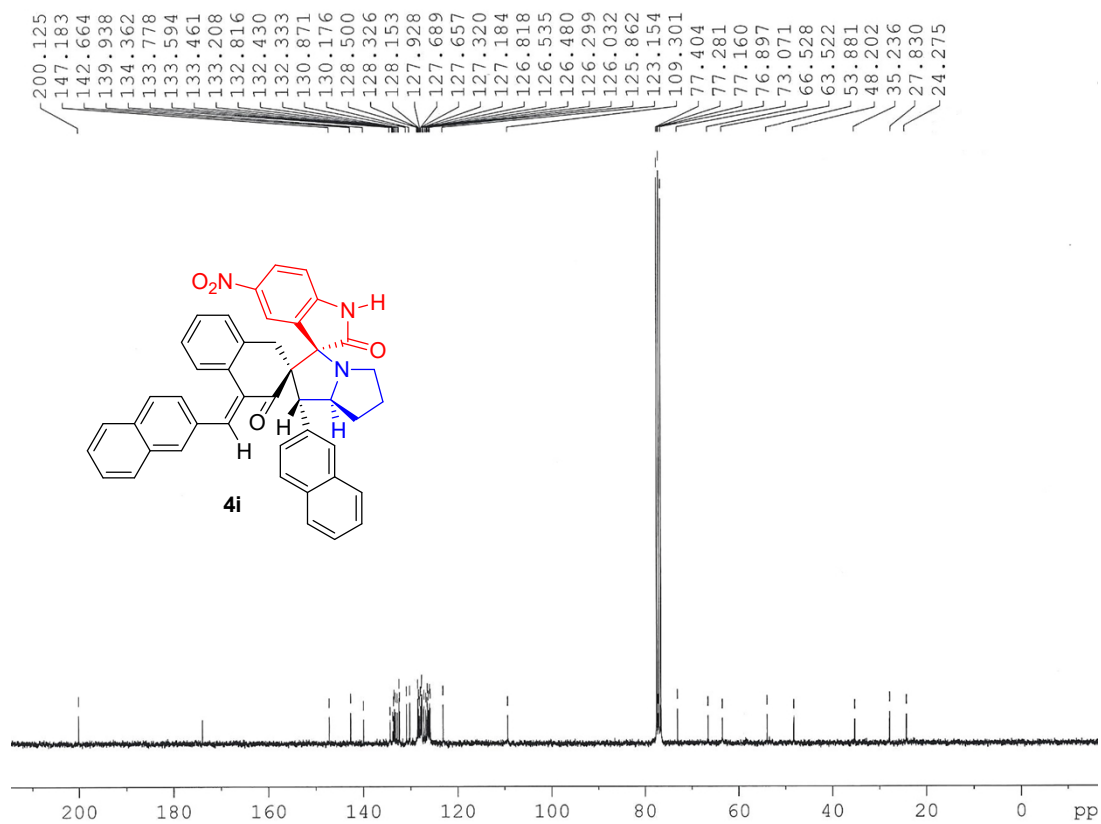

**Fig S19.**  $^1\text{H}$  NMR Spectrum of **4j** in  $\text{CDCl}_3$

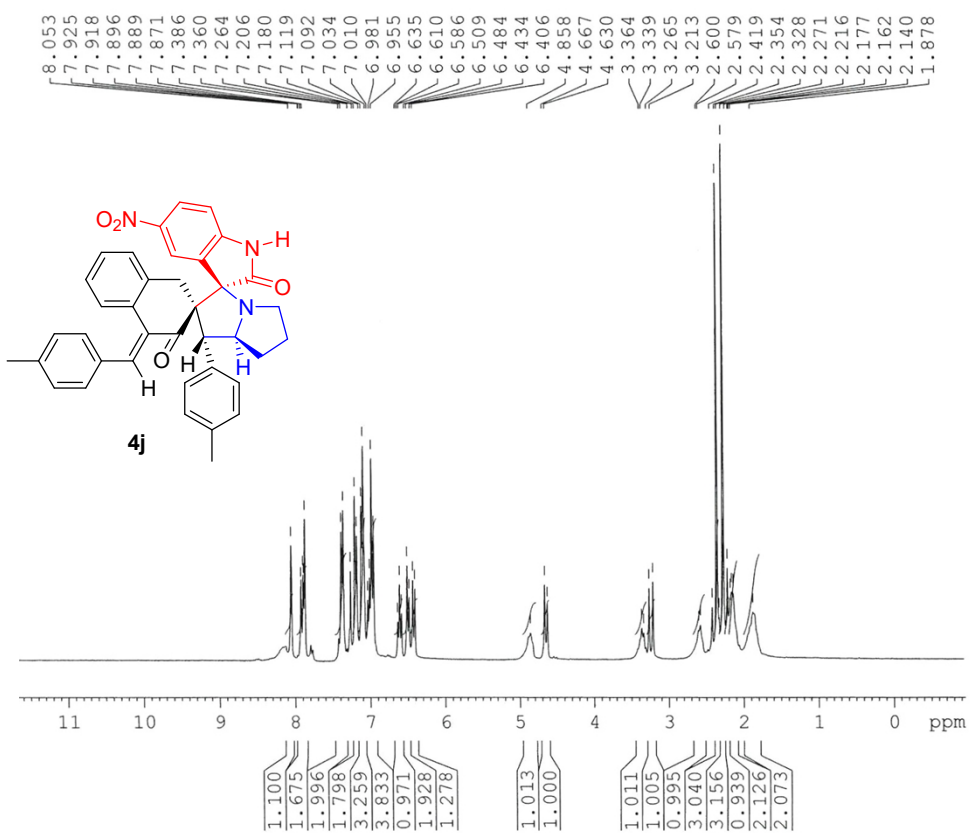

**Fig S20.**  $^{13}\text{C}$   $\{^1\text{H}\}$  NMR Spectrum of **4j** in  $\text{CDCl}_3$

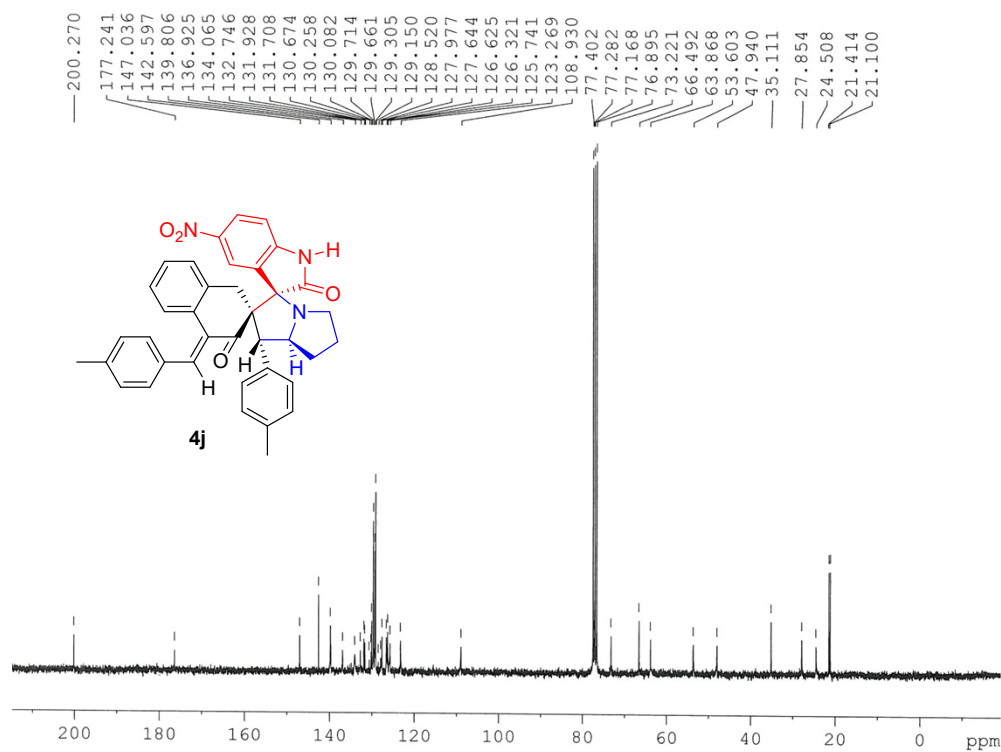

**Fig S21.**  $^1\text{H}$  NMR Spectrum of **4k** in  $\text{CDCl}_3$

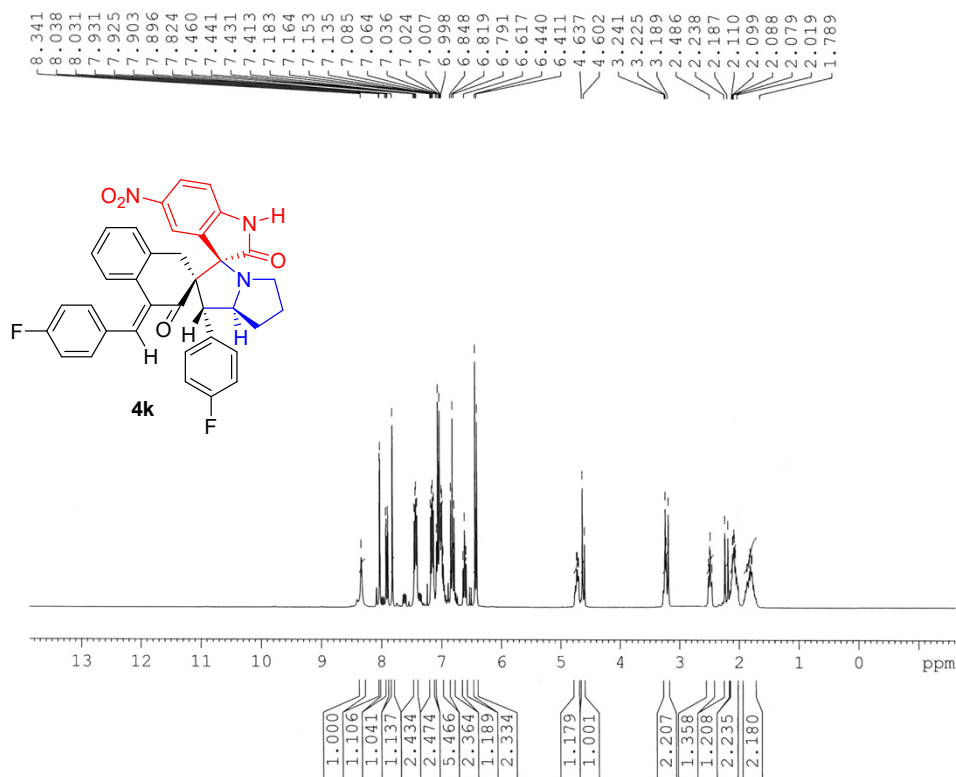

**Fig S22.**  $^{13}\text{C}$   $\{^1\text{H}\}$  NMR Spectrum of **4k** in  $\text{CDCl}_3$

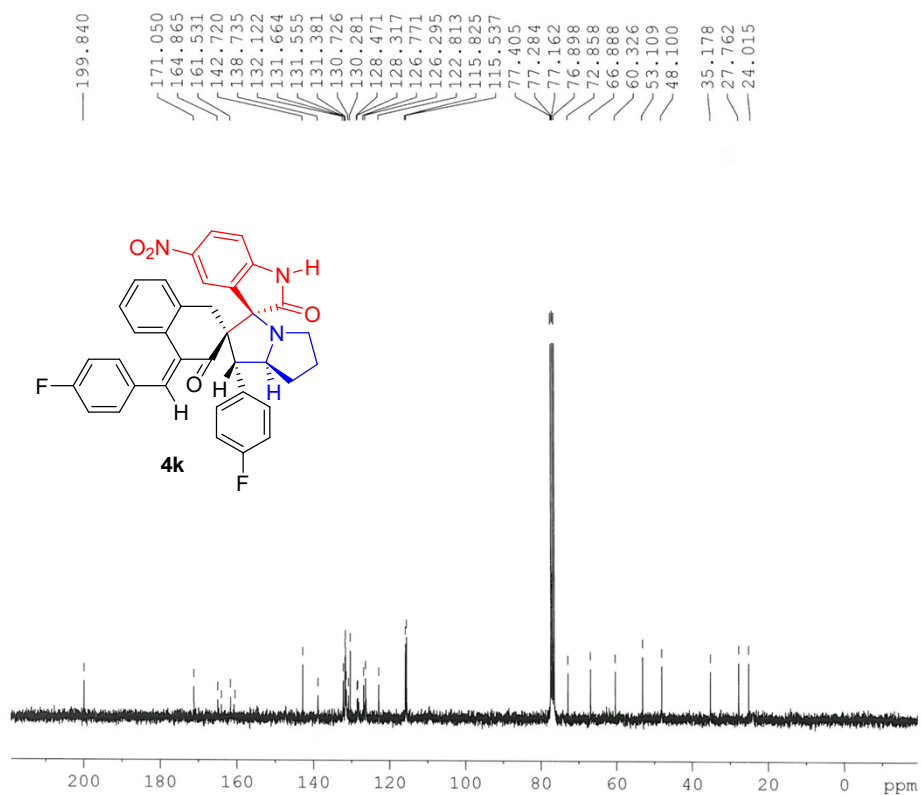

**Fig S23.**  $^1\text{H}$  NMR Spectrum of **5a** in  $\text{CDCl}_3$

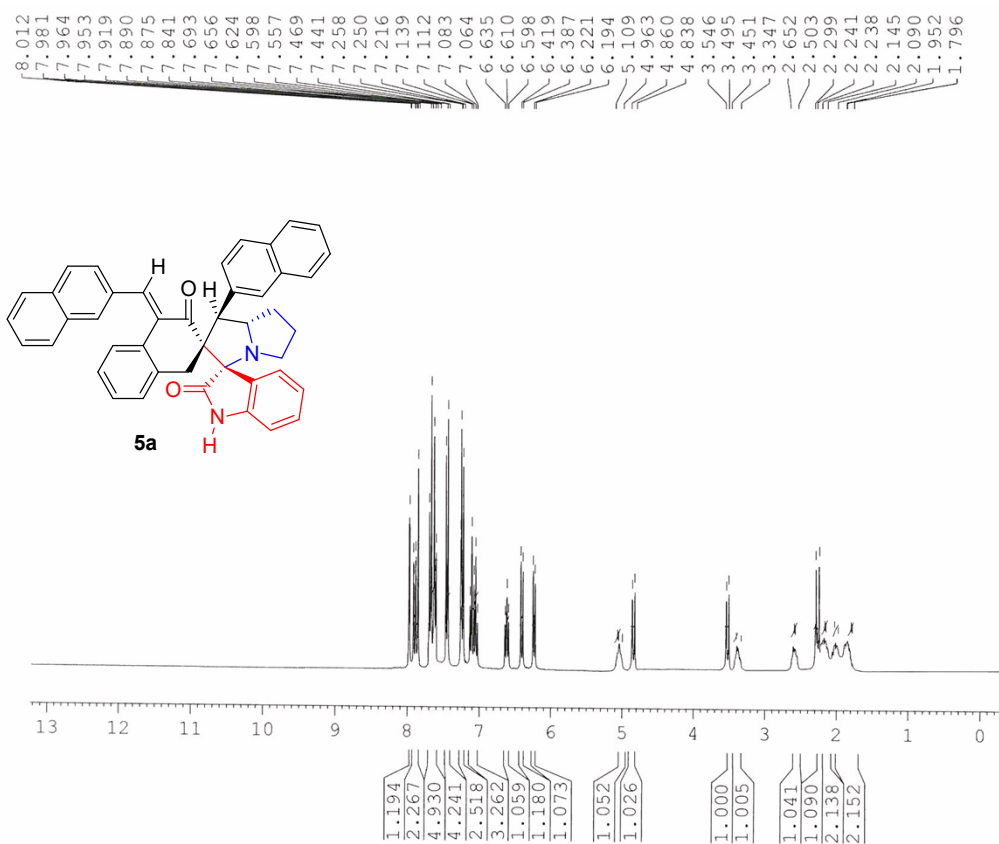

**Fig S24.**  $^{13}\text{C}$   $\{^1\text{H}\}$  NMR Spectrum of **5a** in  $\text{CDCl}_3$

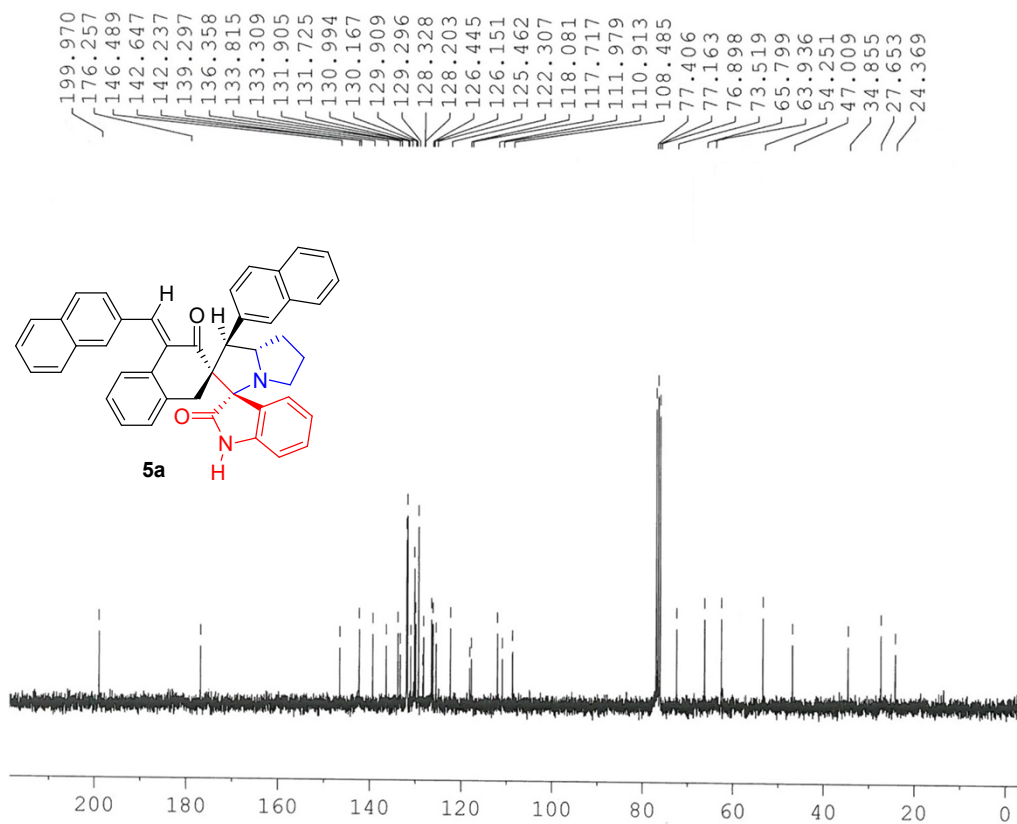

Fig S25. <sup>1</sup>H NMR Spectrum of **5b** in CDCl<sub>3</sub>

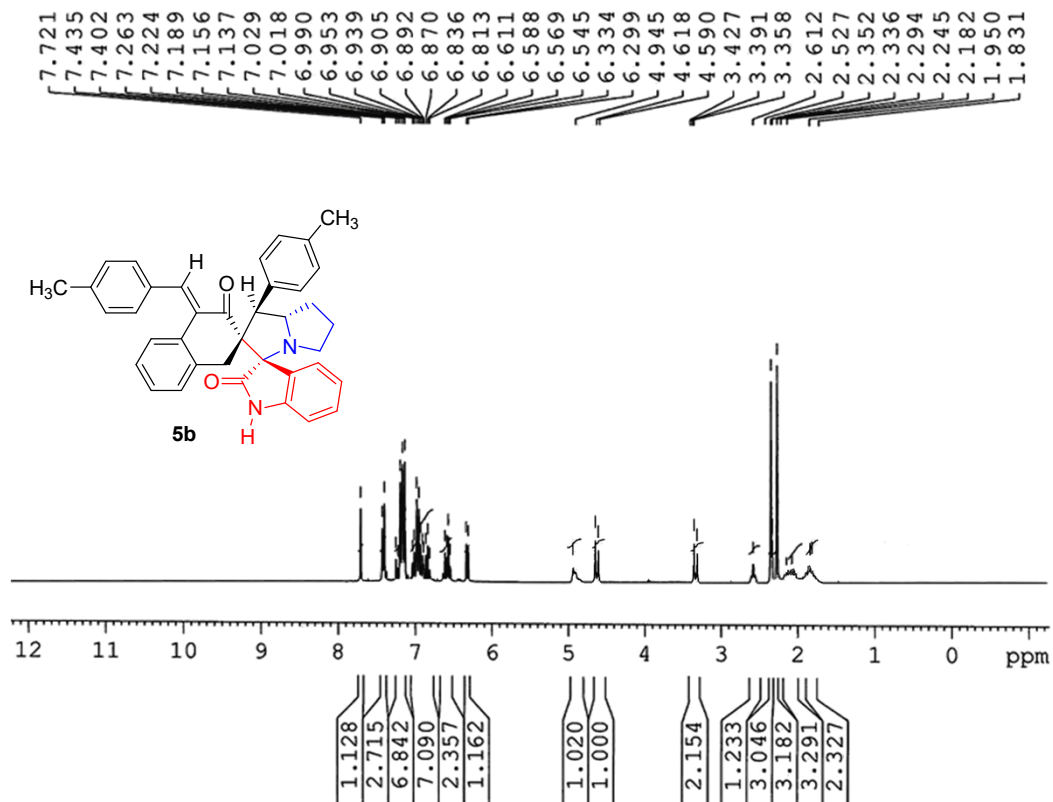

Fig S26. <sup>13</sup>C {<sup>1</sup>H} NMR Spectrum of **5b** in CDCl<sub>3</sub>

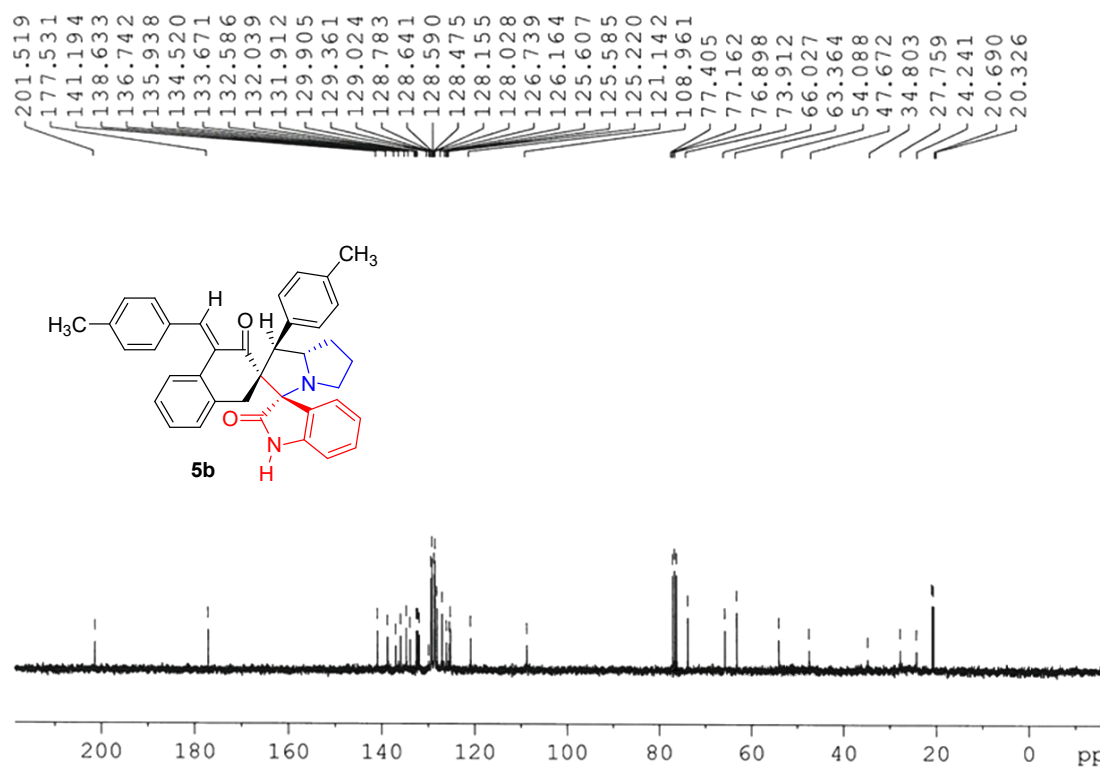

**Fig S27.**  $^1\text{H}$  NMR Spectrum of **5f** in  $\text{CDCl}_3$

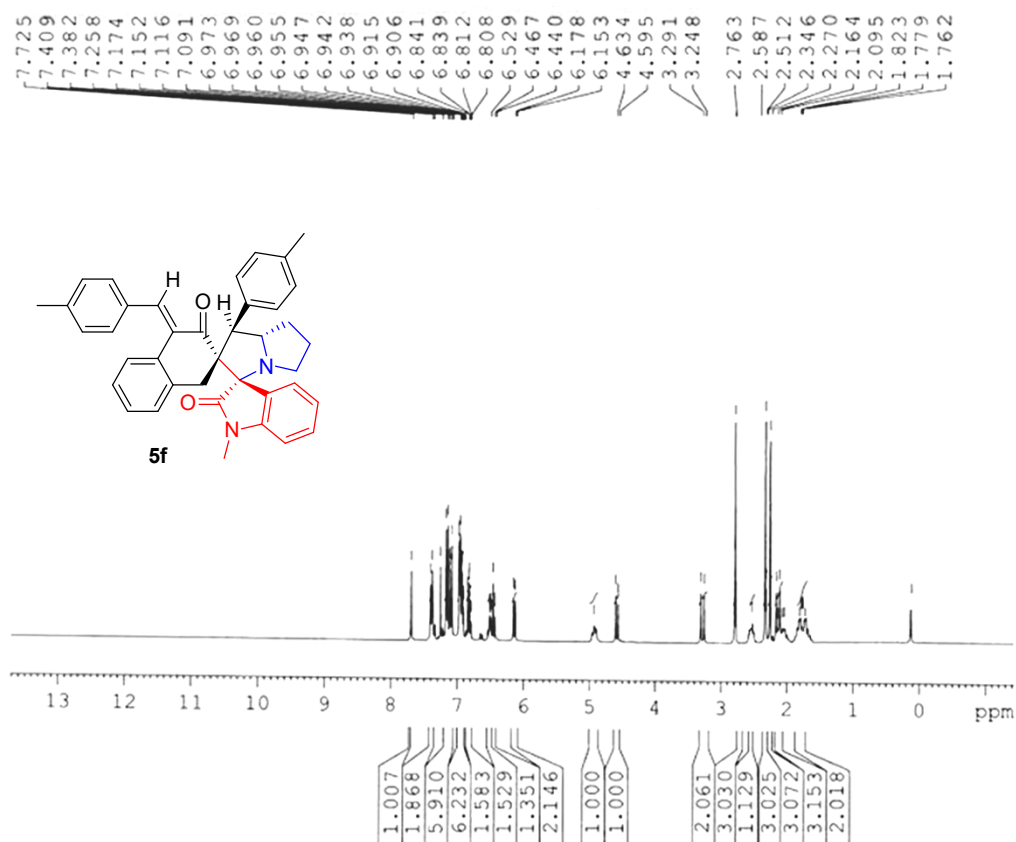

**Fig S28.**  $^{13}\text{C}$   $\{^1\text{H}\}$  NMR Spectrum of **5f** in  $\text{CDCl}_3$

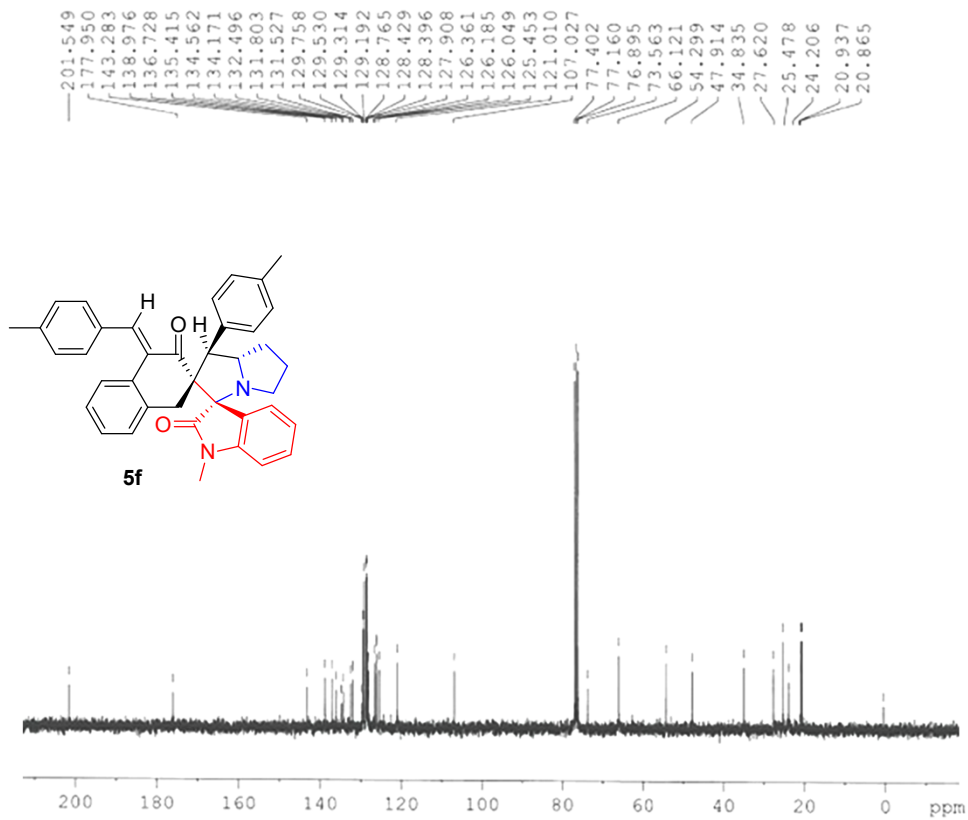

**Fig S29.**  $^1\text{H}$  NMR Spectrum of **5g** in  $\text{CDCl}_3$

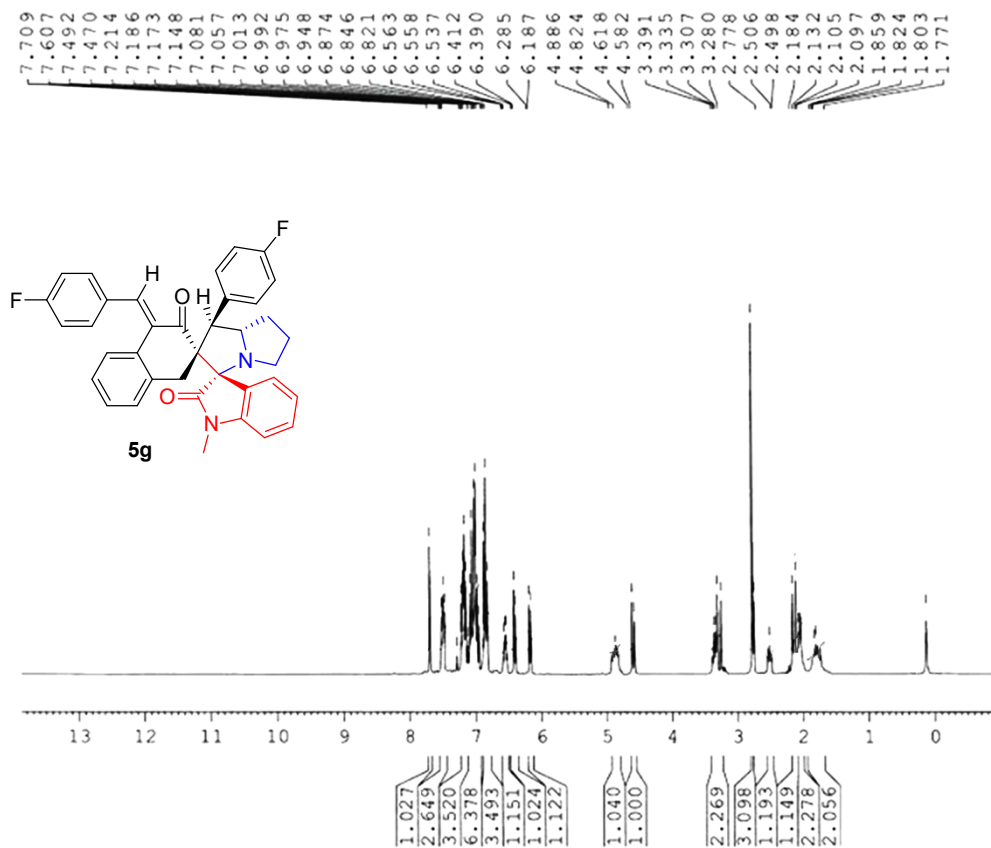

**Fig S30.**  $^{13}\text{C}$   $\{^1\text{H}\}$  NMR Spectrum of **5g** in  $\text{CDCl}_3$

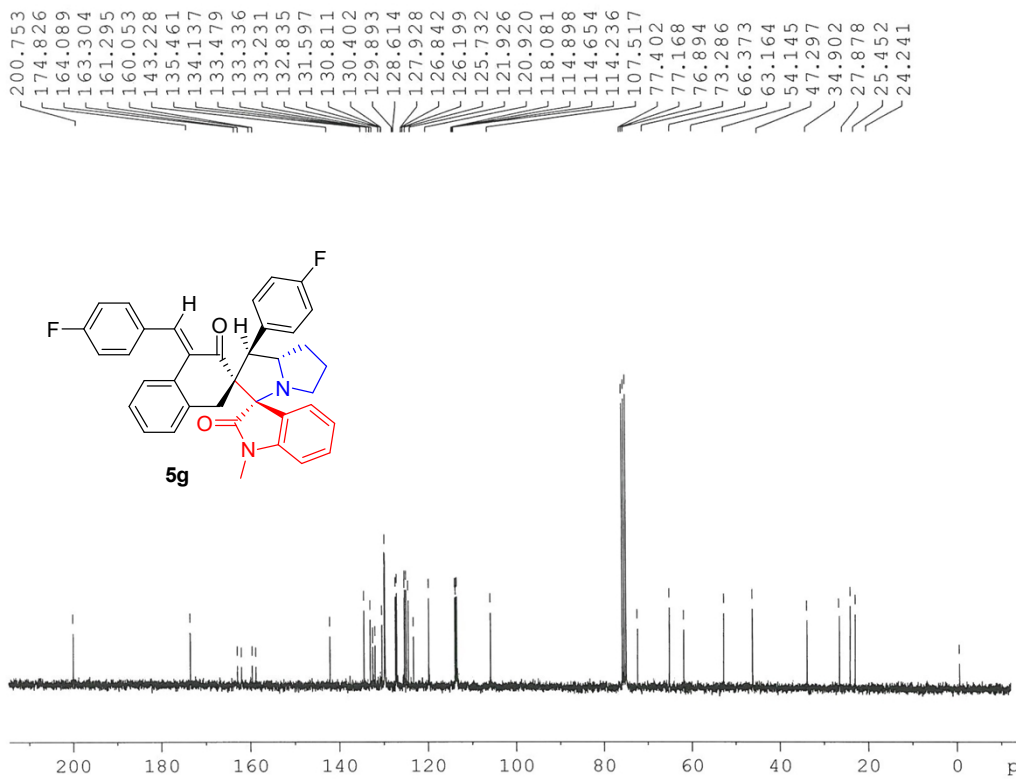

**Fig S31.**  $^1\text{H}$  NMR Spectrum of **5h** in  $\text{CDCl}_3$

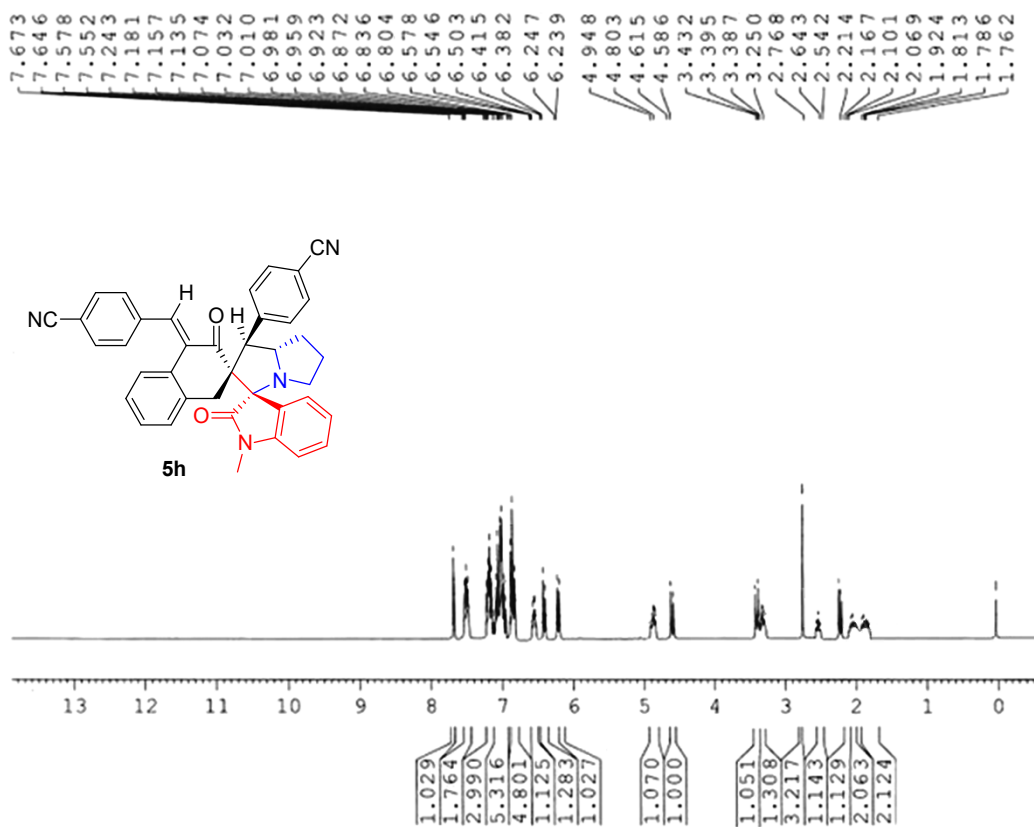

**Fig S32.**  $^{13}\text{C}$   $\{^1\text{H}\}$  NMR Spectrum of **5h** in  $\text{CDCl}_3$



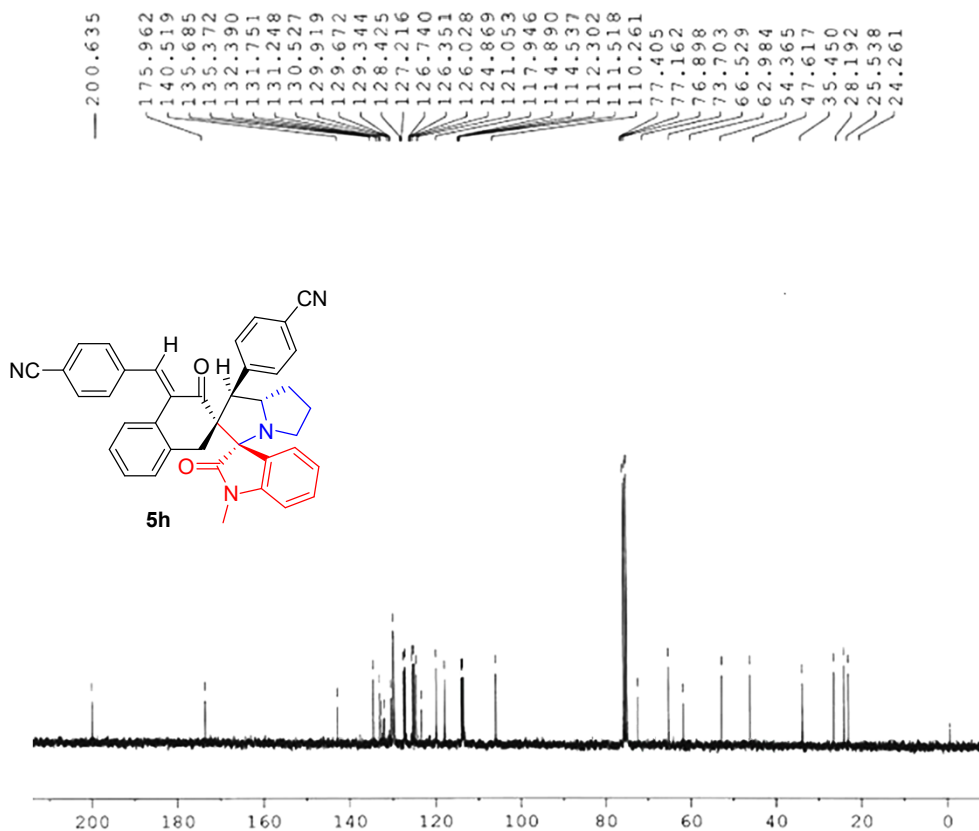

Fig S33.  $^1\text{H}$  NMR Spectrum of **5j** in  $\text{CDCl}_3$

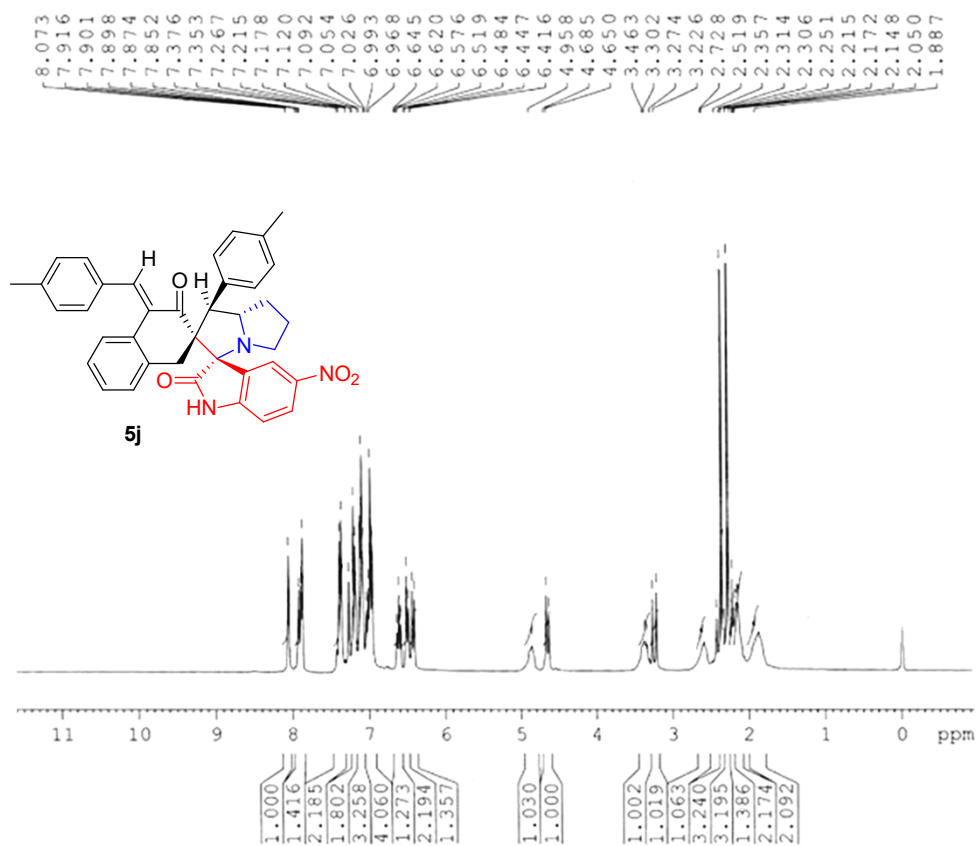

Fig S34.  $^{13}\text{C}$   $\{^1\text{H}\}$  NMR Spectrum of **5j** in  $\text{CDCl}_3$

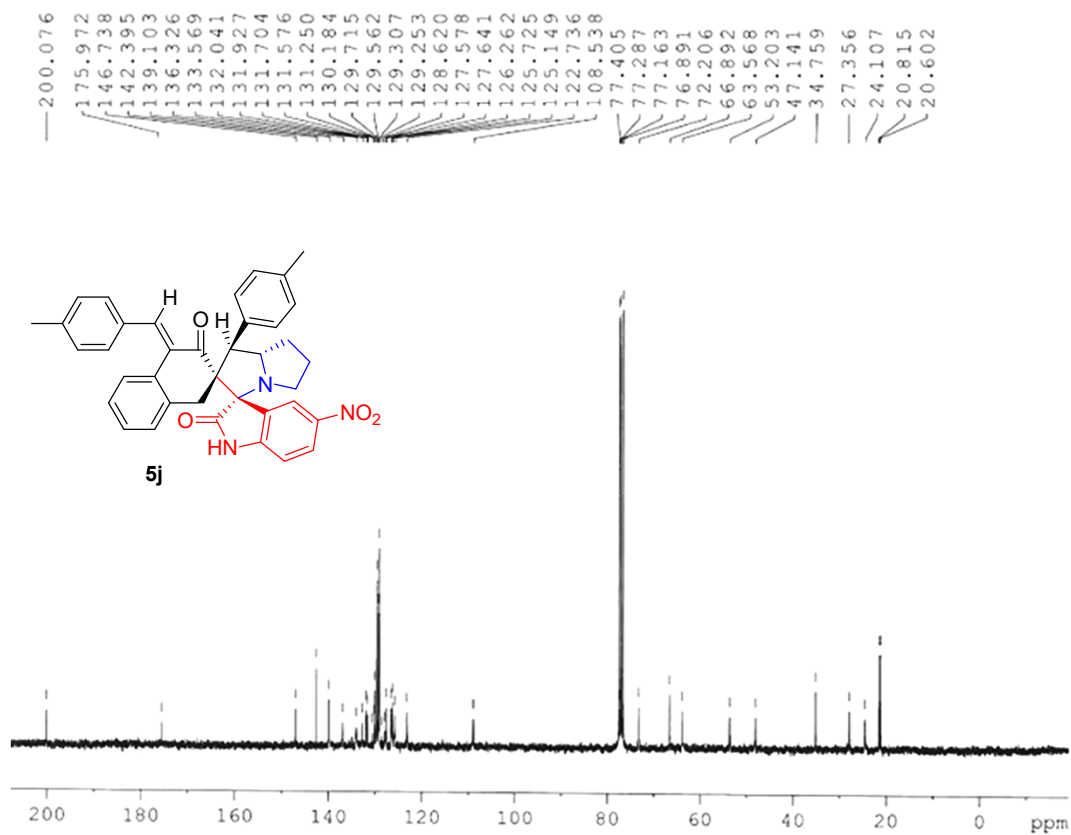

Fig S35. <sup>1</sup>H NMR Spectrum of **5k** in CDCl<sub>3</sub>

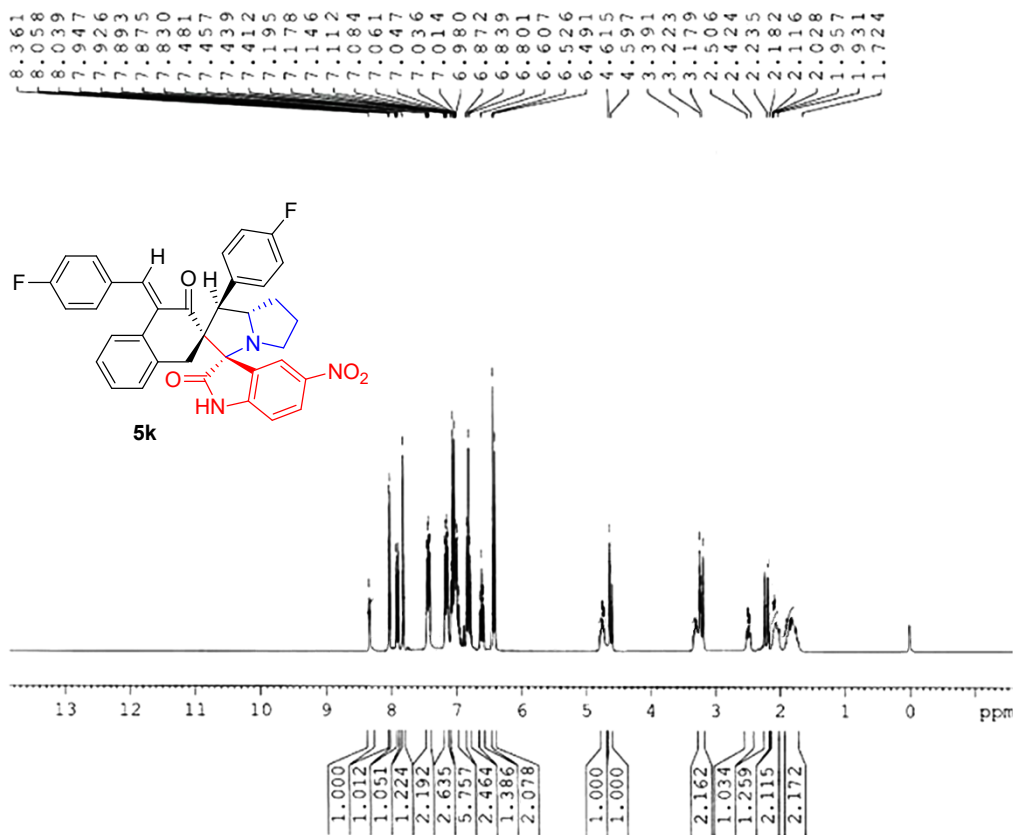

Fig S36. <sup>13</sup>C {<sup>1</sup>H} NMR Spectrum of **5k** in CDCl<sub>3</sub>

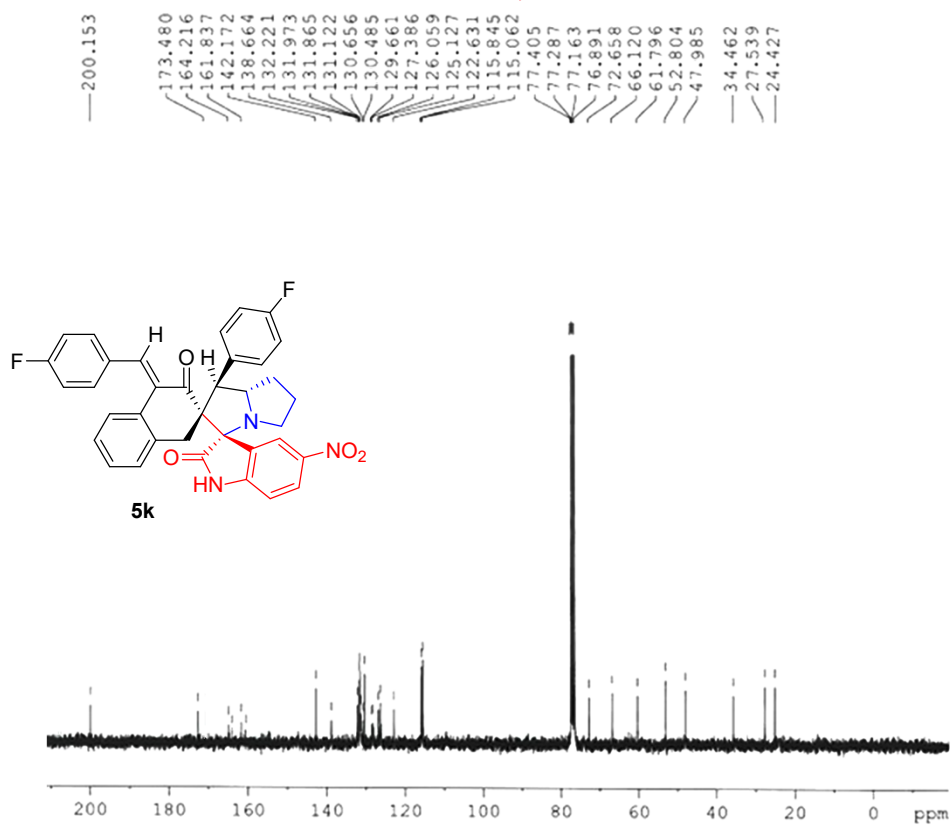

Fig S37.  $^1\text{H}$  NMR Spectrum of **16a** in CDCl<sub>3</sub>

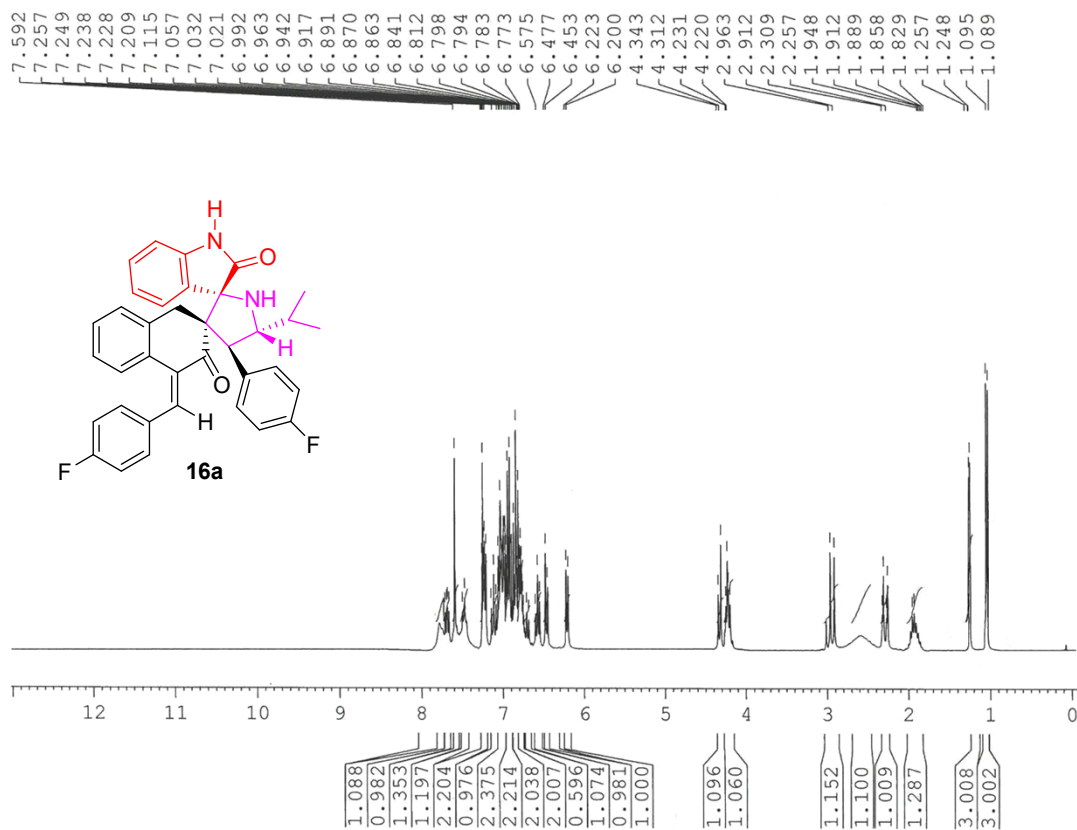

Fig S38.  $^{13}\text{C}$  { $^1\text{H}$ } NMR Spectrum of **16a** in CDCl<sub>3</sub>

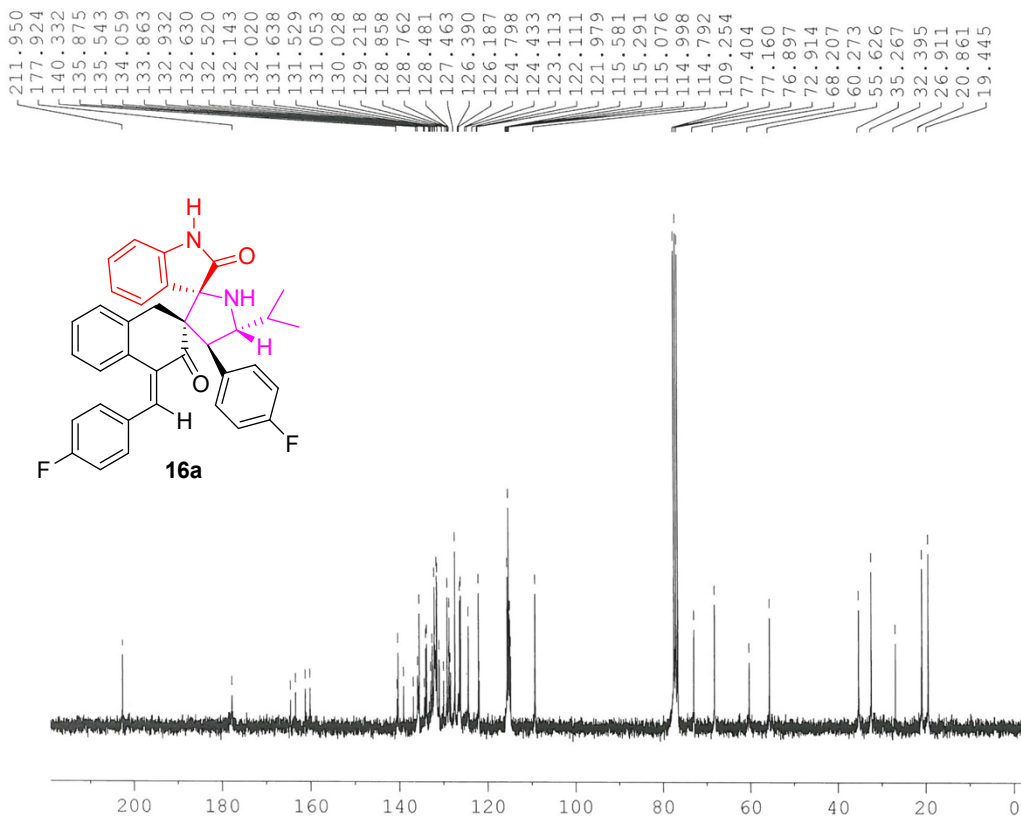

**Fig S39.**  $^1\text{H}$  NMR Spectrum of **17a** in  $\text{CDCl}_3$

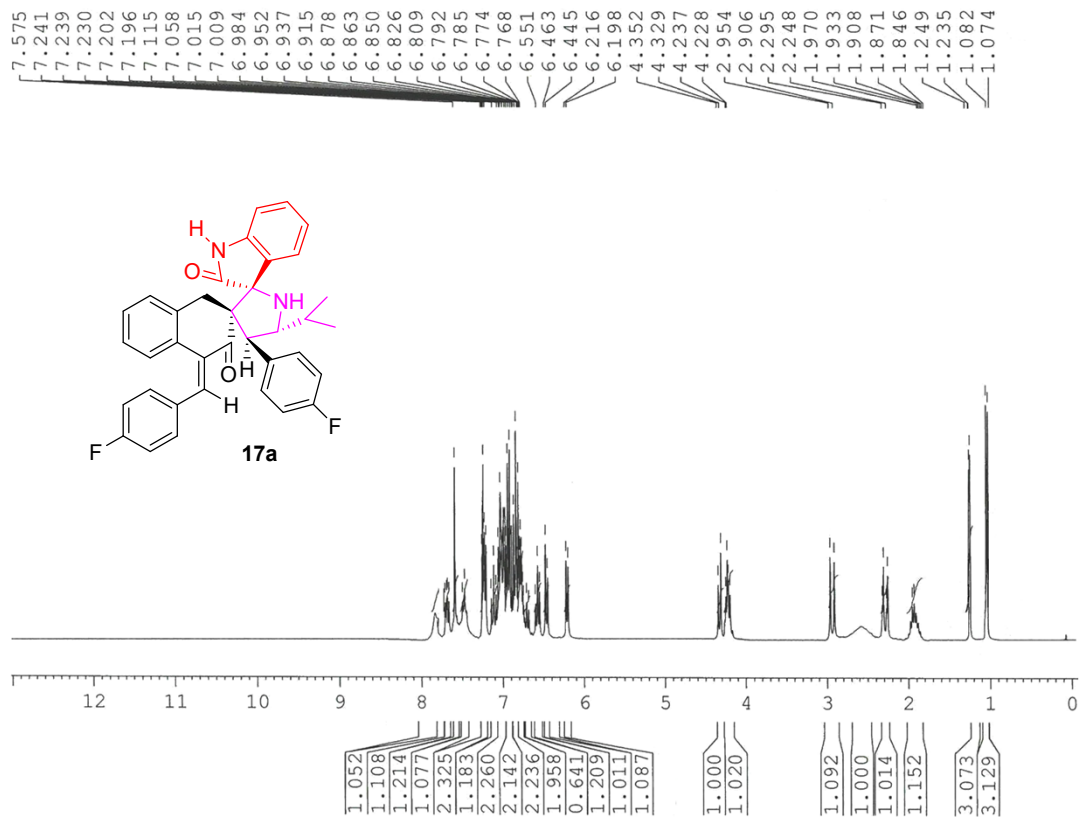

**Fig S40.**  $^{13}\text{C}$   $\{^1\text{H}\}$  NMR Spectrum of **17a** in  $\text{CDCl}_3$

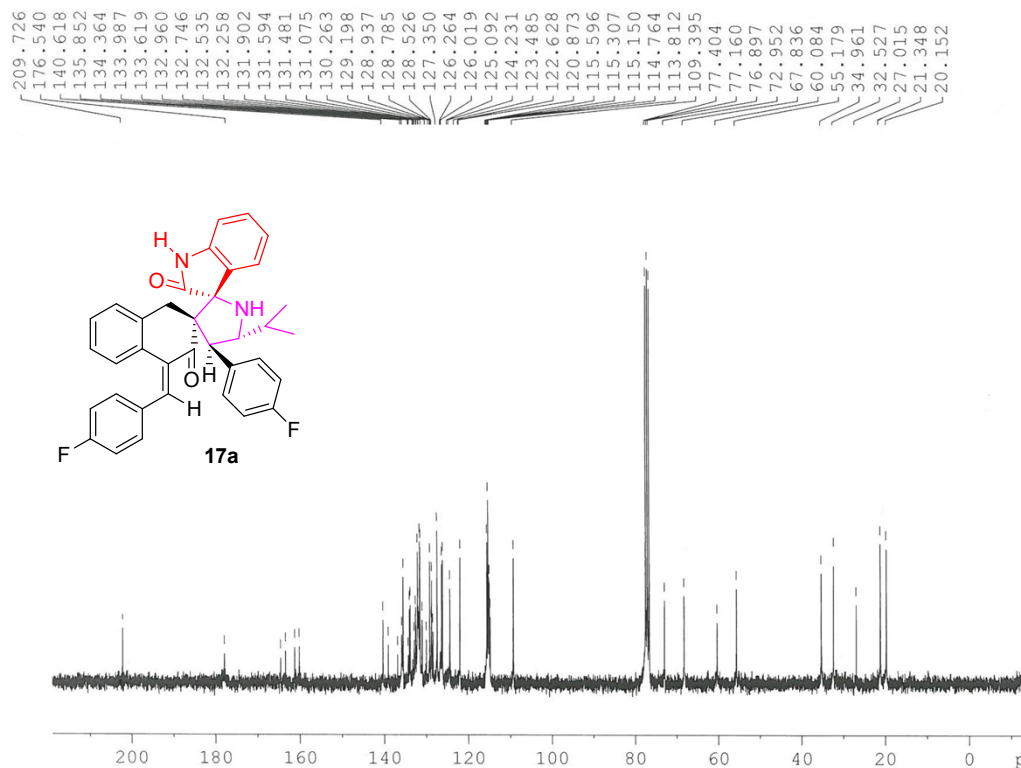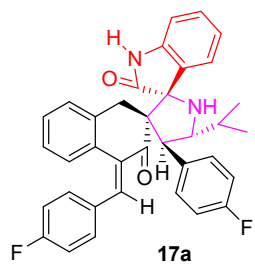

**Fig S41.**  $^1\text{H}$  and  $^{13}\text{C}$  chemical shifts of the diastereoisomer **5k**

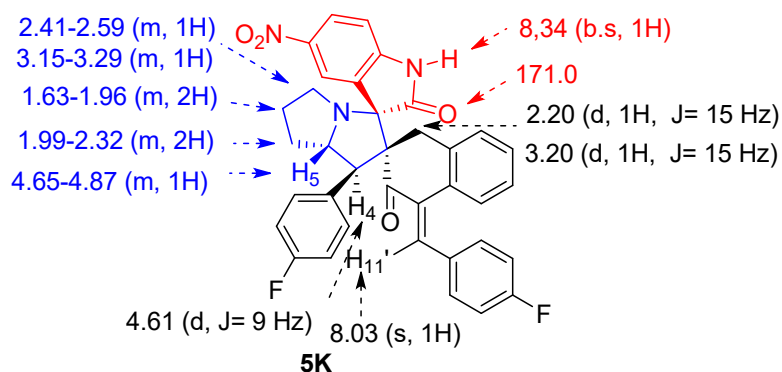

**Fig S42.**  $^1\text{H}$  and  $^{13}\text{C}$  chemical shifts of the diastereoisomer **17a**

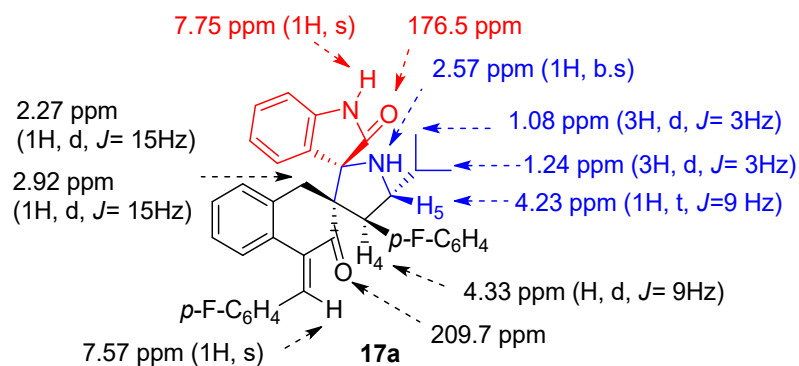

**Fig S43.** An alternative view of the molecular structure of **4k**.

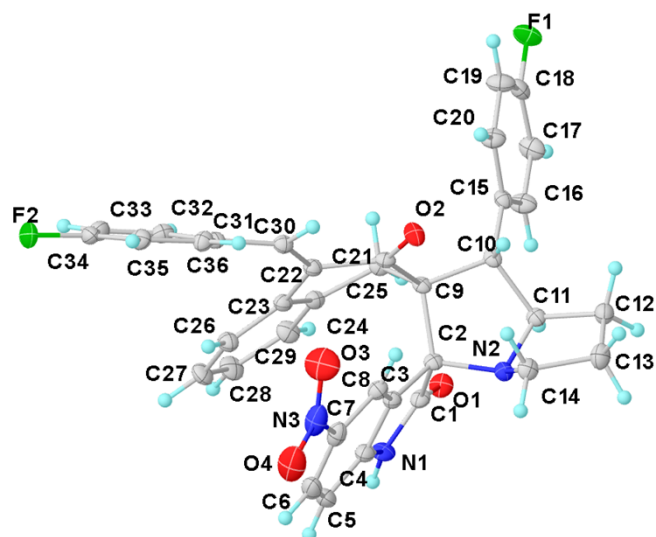

**Fig S44.** View of the supramolecular 2D network of **4k** resulting from intermolecular N-H...O bonding ( $d_{\text{N1-H1...O3}} = 1.972 \text{ \AA}$ ,  $\angle_{\text{N1-H1-O3}} = 170.6^\circ$ ) and weaker C17-H17...O3 contacts with the NO<sub>2</sub> group of a neighbored molecule

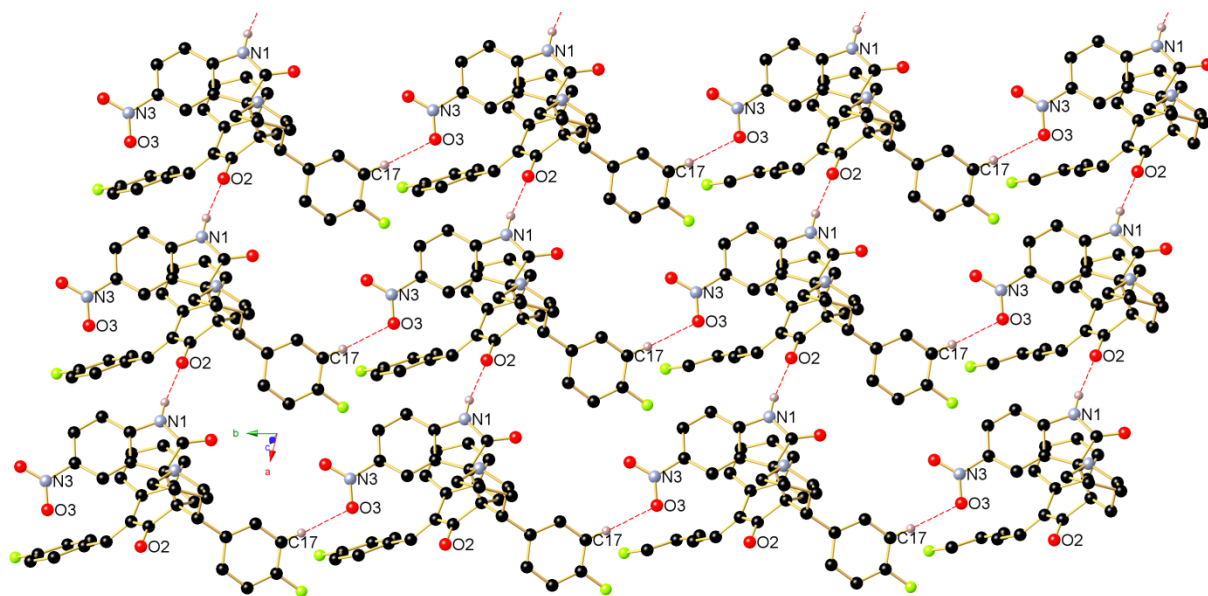

**Table S2:** Selected bond lengths (Å) and angles (°) of **4k**

| Selected bond | Lengths (Å) | Selected angles | Value in (°) |
|---------------|-------------|-----------------|--------------|
| N1-C1         | 1.371 (2)   | C1-N1-C4        | 112.38 (2)   |
| C1-C2         | 1.5645 (19) | N1-C4-C3        | 109.89 (13)  |
| C2-C3         | 1.518 (2)   | C4-C3-C2        | 108.5 (12)   |
| C3-C4         | 1.407 (2)   | C3-C2-C1        | 101.55 (11)  |
| C4-N1         | 1.386 (2)   | C2-C1-N1        | 107.27 (12)  |
| N2-C2         | 1.4772 (19) | N2-C2-C9        | 107.01 (11)  |
| C2-C9         | 1.6072 (19) | C2-C9-C10       | 102.45 (11)  |
| C9-C10        | 1.5615 (19) | C9-C10-C11      | 105.27 (11)  |
| C10-C11       | 1.545 (2)   | C10-C11-N2      | 104.31 (11)  |
| C11-C12       | 1.539 (2)   | C11-N2-C2       | 105.83 (11)  |
| C12-C13       | 1.547 (2)   | C11-N2-C14      | 105.30 (11)  |
| C13-C14       | 1.531 (2)   | N2-C14-C13      | 102.16 (12)  |
| C14-N2        | 1.4826 (18) | C14-C13-C12     | 104.87 (12)  |
| N2-C11        | 1.4758 (19) | C13-C12-C11     | 104.65 (12)  |
| C9-C21        | 1.5332 (19) | C12-C11-N2      | 105.31 (12)  |
| C21-C22       | 1.506 (2)   | C21-C9-C25      | 105.32 (11)  |
| C22-C23       | 1.486 (2)   | C9-C25-C24      | 110.05 (12)  |
| C23-C24       | 1.410 (2)   |                 |              |
| C24-C25       | 1.509 (2)   |                 |              |
| C25-C9        | 1.551 (2)   |                 |              |

**Table S2:** Hydrogen bonds occurring in **4k**.

| D   | H    | A               | d(D-H)/Å | d(H-A)/Å | d(D-A)/Å   | D-H-A/° |
|-----|------|-----------------|----------|----------|------------|---------|
| N1  | H1   | O2 <sup>1</sup> | 0.88     | 1.97     | 2.8429(19) | 170.6   |
| C8  | H8   | O2              | 0.95     | 2.63     | 3.321(2)   | 129.8   |
| C8  | H8   | O5              | 0.95     | 2.42     | 3.255(4)   | 146.6   |
| C12 | H12B | O1 <sup>2</sup> | 0.99     | 2.72     | 3.429(2)   | 129.0   |
| C14 | H14A | O4 <sup>3</sup> | 0.99     | 2.67     | 3.442(2)   | 135.4   |
| C14 | H14B | O5              | 0.99     | 2.70     | 3.470(4)   | 135.3   |
| C17 | H17  | O3 <sup>4</sup> | 0.95     | 2.56     | 3.442(2)   | 154.4   |
| C20 | H20  | O1 <sup>5</sup> | 0.95     | 2.60     | 3.443(2)   | 147.9   |
| C26 | H26  | F2 <sup>6</sup> | 0.95     | 2.54     | 3.412(2)   | 153.1   |
| C35 | H35  | F1 <sup>7</sup> | 0.95     | 2.60     | 3.228(2)   | 123.9   |

**Table S2:** Hydrogen bonds occurring in **4k**.

| D   | H    | A   | d(D-H)/Å | d(H-A)/Å | d(D-A)/Å | D-H-A/° |
|-----|------|-----|----------|----------|----------|---------|
| C36 | H36  | F17 | 0.95     | 2.70     | 3.289(2) | 121.1   |
| C39 | H39B | O3  | 0.99     | 2.33     | 3.140(5) | 139.0   |

<sup>1</sup>1+X,+Y,+Z; <sup>2</sup>1-X,1-Y,2-Z; <sup>3</sup>1-X,-Y,2-Z; <sup>4</sup>+X,1+Y,+Z; <sup>5</sup>-1+X,+Y,+Z; <sup>6</sup>1-X,-Y,1-Z; <sup>7</sup>+X,-1+Y,+Z

**Table S3:** Crystal data collection and structure refinement of **4k**.

|                                                    |                                                                               |
|----------------------------------------------------|-------------------------------------------------------------------------------|
| CCDC                                               | 2097365                                                                       |
| Compound /Formula                                  | C <sub>386</sub> H <sub>31</sub> F <sub>2</sub> N <sub>3</sub> O <sub>5</sub> |
| Formula weight                                     | 647.66                                                                        |
| Temperature/K                                      | 100(2)                                                                        |
| Wavelength/Å                                       | 0.71073                                                                       |
| Crystal system                                     | triclinic                                                                     |
| Space group                                        | P-1                                                                           |
| <i>a</i> /Å                                        | 8.244(4)                                                                      |
| <i>b</i> /Å                                        | 12.956(6)                                                                     |
| <i>c</i> /Å                                        | 15.359(8)                                                                     |
| $\alpha$                                           | 75.195(19)°                                                                   |
| $\beta$                                            | 80.54(2)°                                                                     |
| $\gamma$                                           | 77.813(17)°                                                                   |
| Volume/ Å <sup>3</sup>                             | 1539.6(13)                                                                    |
| <i>Z</i>                                           | 2                                                                             |
| $\rho_{\text{calc}}$ g/cm <sup>3</sup>             | 1.3794                                                                        |
| Absorp. coefficient/mm <sup>-1</sup>               | 0.101                                                                         |
| <i>F</i> (000)                                     | 676.0                                                                         |
| Crystal size/mm <sup>3</sup>                       | 0.395 x 0.207 x 0.082                                                         |
| 2 Theta range for data collection/°                | 5.556 to 598.232                                                              |
| Index ranges                                       | -11<= <i>h</i> <=11,<br>-17<= <i>k</i> <=16<br>-21<= <i>l</i> <=19            |
| Reflections collected                              | 20681                                                                         |
| Independent reflections                            | 8000 [ <i>R</i> (int) = 0.0364]                                               |
| Refinement method                                  | Full-matrix least-squares on <i>F</i> <sup>2</sup>                            |
| Data/restraints/parameters                         | 8000 / 39 / 463                                                               |
| Goodness-of-fit on <i>F</i> <sup>2</sup>           | 1.039                                                                         |
| Final <i>R</i> indices [ <i>I</i> >2σ( <i>I</i> )] | <i>R</i> 1 = 0.0470,<br><i>wR</i> 2 = 0.1160                                  |
| <i>R</i> indices (all data)                        | <i>R</i> 1 = 0.06706,<br><i>wR</i> 2 = 0.11271                                |
| Largest diff. peak and hole/e. Å <sup>-3</sup>     | 0.45 and -0.38                                                                |

**DFT supplement:**



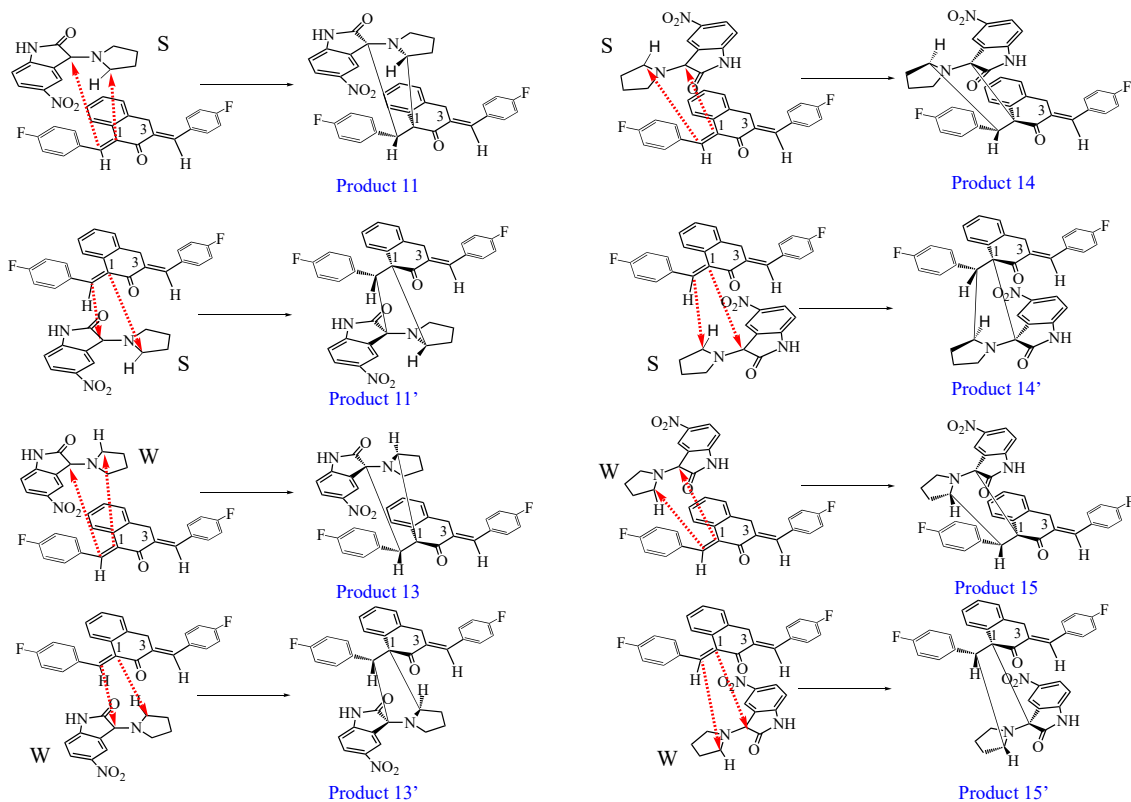

**Fig 45S.** The different possible approaches of the dipolarophile to the azomethine ylides on double bond at position 1.

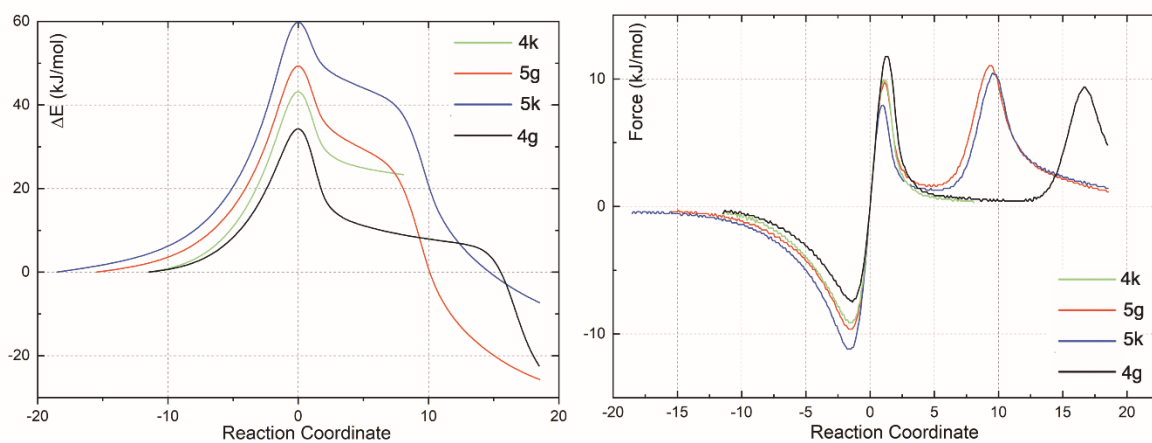

**Fig 46S:** The intrinsic reaction coordinate plots of the compounds *g* and *k* to lead to products 4 and 5.

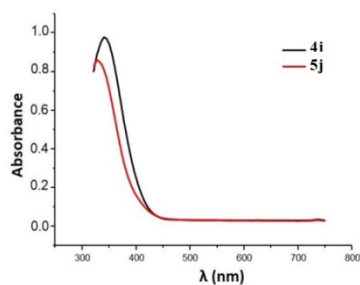

**Figure 47S.** Superposition of **4j** and **5j** compounds absorption spectra

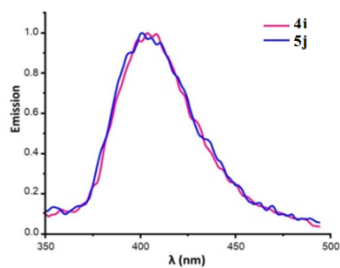

**Figure 48 S.** Superposition of **4j** and **5j** compounds emission spectra

### Cartesian Coordinates of the optimized Structures:

#### Prod4a

|    | Atom | X       | Y       | Z       |
|----|------|---------|---------|---------|
| 1  | C    | 1.7195  | -1.9411 | -0.4274 |
| 2  | N    | 2.7775  | -1.9759 | -1.4360 |
| 3  | C    | 3.5270  | -0.7121 | -1.3371 |
| 4  | C    | 2.4876  | -2.2219 | -2.8609 |
| 5  | C    | 3.8044  | -1.7942 | -3.5125 |
| 6  | C    | 4.2155  | -0.5387 | -2.7107 |
| 7  | H    | 4.2544  | -0.7935 | -0.5305 |
| 8  | C    | 0.6413  | -2.9996 | -0.6429 |
| 9  | C    | 0.7758  | -3.9931 | 0.3390  |
| 10 | N    | 1.8256  | -3.6646 | 1.1985  |
| 11 | C    | 2.4259  | -2.4753 | 0.8704  |
| 12 | C    | -0.3393 | -3.1489 | -1.6150 |
| 13 | C    | -1.1769 | -4.2700 | -1.5843 |
| 14 | C    | -1.0299 | -5.2372 | -0.5943 |
| 15 | C    | -0.0437 | -5.1110 | 0.3863  |
| 16 | O    | 3.3577  | -1.9766 | 1.4670  |
| 17 | H    | 2.2514  | -3.2736 | -3.0285 |
| 18 | H    | 1.6591  | -1.6110 | -3.2424 |
| 19 | H    | 4.5487  | -2.5843 | -3.3846 |
| 20 | H    | 3.6949  | -1.5998 | -4.5816 |
| 21 | H    | 5.2987  | -0.4483 | -2.6164 |
| 22 | H    | 3.8576  | 0.3705  | -3.2006 |
| 23 | H    | -0.4664 | -2.4087 | -2.3928 |
| 24 | H    | -1.6849 | -6.1010 | -0.5813 |
| 25 | H    | 0.0779  | -5.8629 | 1.1574  |
| 26 | C    | -0.0991 | -0.6504 | 1.8450  |
| 27 | C    | 1.0739  | 0.0543  | 1.2187  |
| 28 | C    | 1.2940  | -0.3834 | -0.2502 |
| 29 | C    | -0.0244 | -0.1355 | -1.0221 |
| 30 | C    | -1.3090 | -0.0970 | -0.2312 |
| 31 | C    | -1.2931 | -0.7176 | 1.1069  |
| 32 | C    | -2.3813 | -1.4323 | 1.6274  |
| 33 | C    | -2.3045 | -2.0180 | 2.8851  |
| 34 | C    | -2.3466 | 0.5168  | -0.8545 |
| 35 | H    | -2.1472 | 0.7725  | -1.8920 |
| 36 | C    | 2.4677  | 0.3758  | -0.9842 |
| 37 | H    | 2.0395  | 0.7075  | -1.9304 |
| 38 | O    | -0.0246 | 0.0450  | -2.2280 |
| 39 | H    | 0.8922  | 1.1353  | 1.2155  |
| 40 | H    | 1.9735  | -0.1066 | 1.8059  |
| 41 | H    | -3.2840 | -1.5362 | 1.0388  |
| 42 | H    | -3.1536 | -2.5675 | 3.2757  |
| 43 | C    | -1.1341 | -1.9088 | 3.6364  |
| 44 | H    | -1.0736 | -2.3609 | 4.6202  |
| 45 | C    | -0.0345 | -1.2367 | 3.1096  |
| 46 | H    | 0.8885  | -1.1724 | 3.6762  |
| 47 | C    | 3.0432  | 1.5983  | -0.3002 |
| 48 | C    | 2.7419  | 2.8581  | -0.7751 |
| 49 | C    | 3.9258  | 1.4901  | 0.8134  |
| 50 | C    | 3.2744  | 4.0345  | -0.1866 |
| 51 | H    | 2.0783  | 2.9640  | -1.6284 |

|    |   |         |         |         |
|----|---|---------|---------|---------|
| 52 | C | 4.4599  | 2.6066  | 1.4056  |
| 53 | H | 4.1719  | 0.5087  | 1.2018  |
| 54 | C | 2.9649  | 5.3322  | -0.6715 |
| 55 | C | 4.1557  | 3.9092  | 0.9315  |
| 56 | H | 5.1298  | 2.5027  | 2.2532  |
| 57 | C | 3.4989  | 6.4511  | -0.0791 |
| 58 | H | 2.2961  | 5.4272  | -1.5208 |
| 59 | C | 4.6910  | 5.0836  | 1.5199  |
| 60 | C | 4.3708  | 6.3260  | 1.0278  |
| 61 | H | 3.2538  | 7.4367  | -0.4588 |
| 62 | H | 5.3602  | 4.9848  | 2.3686  |
| 63 | H | 4.7859  | 7.2167  | 1.4861  |
| 64 | C | -3.6658 | 0.9313  | -0.3778 |
| 65 | C | -4.6773 | 1.0929  | -1.3124 |
| 66 | C | -3.9462 | 1.2593  | 0.9837  |
| 67 | C | -5.9787 | 1.5132  | -0.9486 |
| 68 | H | -4.4736 | 0.8831  | -2.3580 |
| 69 | C | -5.1883 | 1.6913  | 1.3624  |
| 70 | H | -3.1573 | 1.1840  | 1.7194  |
| 71 | C | -7.0237 | 1.6518  | -1.8998 |
| 72 | C | -6.2469 | 1.8192  | 0.4221  |
| 73 | H | -5.3777 | 1.9510  | 2.3987  |
| 74 | C | -8.2743 | 2.0693  | -1.5131 |
| 75 | H | -6.8187 | 1.4207  | -2.9398 |
| 76 | C | -7.5458 | 2.2498  | 0.7875  |
| 77 | C | -8.5380 | 2.3710  | -0.1571 |
| 78 | H | -9.0651 | 2.1702  | -2.2477 |
| 79 | H | -7.7468 | 2.4839  | 1.8277  |
| 80 | H | -9.5287 | 2.7007  | 0.1348  |
| 81 | H | -1.9442 | -4.3831 | -2.3409 |
| 82 | H | 2.1413  | -4.2211 | 1.9781  |

**Ts4a**

|    | Atom | X       | Y       | Z       |
|----|------|---------|---------|---------|
| 1  | C    | 0.9246  | -2.5212 | -0.7355 |
| 2  | N    | 1.7657  | -2.0793 | -1.6993 |
| 3  | C    | 2.9312  | -1.4188 | -1.4440 |
| 4  | C    | 1.4556  | -2.1252 | -3.1555 |
| 5  | C    | 2.5673  | -1.2843 | -3.7974 |
| 6  | C    | 3.6849  | -1.2479 | -2.7376 |
| 7  | H    | 3.4268  | -1.6868 | -0.5233 |
| 8  | C    | -0.3980 | -3.0977 | -0.8753 |
| 9  | C    | -0.7428 | -3.6177 | 0.4008  |
| 10 | N    | 0.3194  | -3.4149 | 1.2695  |
| 11 | C    | 1.3728  | -2.7541 | 0.6555  |
| 12 | C    | -1.3376 | -3.2013 | -1.9085 |
| 13 | C    | -2.5654 | -3.8149 | -1.6634 |
| 14 | C    | -2.8761 | -4.3212 | -0.4006 |
| 15 | C    | -1.9630 | -4.2241 | 0.6509  |
| 16 | O    | 2.4390  | -2.4859 | 1.2074  |
| 17 | H    | 1.4754  | -3.1737 | -3.4678 |
| 18 | H    | 0.4747  | -1.6996 | -3.3339 |
| 19 | H    | 2.8980  | -1.7059 | -4.7472 |
| 20 | H    | 2.1908  | -0.2780 | -3.9845 |
| 21 | H    | 4.3905  | -2.0778 | -2.8674 |
| 22 | H    | 4.2680  | -0.3255 | -2.7568 |
| 23 | H    | -1.1344 | -2.8102 | -2.8942 |
| 24 | H    | -3.8367 | -4.7934 | -0.2303 |
| 25 | H    | -2.2011 | -4.6085 | 1.6358  |
| 26 | C    | -0.1594 | 0.0028  | 2.1098  |
| 27 | C    | 1.1518  | 0.4132  | 1.4866  |
| 28 | C    | 1.1946  | 0.3207  | -0.0147 |
| 29 | C    | -0.0387 | 0.3225  | -0.7927 |
| 30 | C    | -1.3289 | 0.4915  | -0.0336 |
| 31 | C    | -1.3536 | 0.0330  | 1.3692  |
| 32 | C    | -2.5271 | -0.4675 | 1.9623  |
| 33 | C    | -2.5349 | -0.9127 | 3.2759  |
| 34 | C    | -2.3385 | 1.0543  | -0.7418 |
| 35 | H    | -2.1176 | 1.1617  | -1.8007 |
| 36 | C    | 2.3823  | 0.4559  | -0.7611 |
| 37 | H    | 2.1805  | 0.8081  | -1.7688 |
| 38 | O    | -0.0303 | 0.2847  | -2.0327 |
| 39 | H    | 1.4003  | 1.4430  | 1.7890  |
| 40 | H    | 1.9344  | -0.2143 | 1.9186  |
| 41 | H    | -3.4351 | -0.5176 | 1.3763  |
| 42 | H    | -3.4534 | -1.2902 | 3.7112  |
| 43 | C    | -1.3587 | -0.8828 | 4.0277  |
| 44 | H    | -1.3573 | -1.2208 | 5.0582  |
| 45 | C    | -0.1818 | -0.4398 | 3.4364  |
| 46 | H    | 0.7446  | -0.4487 | 4.0022  |
| 47 | C    | 3.6675  | 0.9689  | -0.2078 |
| 48 | C    | 4.2417  | 2.0798  | -0.7987 |
| 49 | C    | 4.3498  | 0.3570  | 0.8845  |
| 50 | C    | 5.4567  | 2.6400  | -0.3303 |
| 51 | H    | 3.7441  | 2.5557  | -1.6384 |
| 52 | C    | 5.5320  | 0.8700  | 1.3549  |
| 53 | H    | 3.9408  | -0.5409 | 1.3311  |
| 54 | C    | 6.0391  | 3.7914  | -0.9231 |

|    |   |         |         |         |
|----|---|---------|---------|---------|
| 55 | C | 6.1203  | 2.0241  | 0.7758  |
| 56 | H | 6.0388  | 0.3854  | 2.1833  |
| 57 | C | 7.2191  | 4.3077  | -0.4454 |
| 58 | H | 5.5341  | 4.2605  | -1.7612 |
| 59 | C | 7.3381  | 2.5805  | 1.2435  |
| 60 | C | 7.8758  | 3.6964  | 0.6484  |
| 61 | H | 7.6526  | 5.1885  | -0.9056 |
| 62 | H | 7.8399  | 2.1098  | 2.0826  |
| 63 | H | 8.8066  | 4.1140  | 1.0155  |
| 64 | C | -3.6443 | 1.5827  | -0.3365 |
| 65 | C | -4.6797 | 1.5793  | -1.2573 |
| 66 | C | -3.8773 | 2.1906  | 0.9346  |
| 67 | C | -5.9590 | 2.1055  | -0.9553 |
| 68 | H | -4.5139 | 1.1517  | -2.2414 |
| 69 | C | -5.0968 | 2.7267  | 1.2498  |
| 70 | H | -3.0665 | 2.2429  | 1.6491  |
| 71 | C | -7.0296 | 2.0788  | -1.8877 |
| 72 | C | -6.1796 | 2.6925  | 0.3299  |
| 73 | H | -5.2482 | 3.1970  | 2.2161  |
| 74 | C | -8.2578 | 2.6033  | -1.5645 |
| 75 | H | -6.8618 | 1.6344  | -2.8633 |
| 76 | C | -7.4566 | 3.2272  | 0.6309  |
| 77 | C | -8.4742 | 3.1831  | -0.2931 |
| 78 | H | -9.0675 | 2.5754  | -2.2851 |
| 79 | H | -7.6200 | 3.6742  | 1.6062  |
| 80 | H | -9.4475 | 3.5947  | -0.0504 |
| 81 | H | -3.2886 | -3.8935 | -2.4665 |
| 82 | H | 0.3102  | -3.5866 | 2.2620  |

Prod5a

|    | Atom | X       | Y       | Z       |
|----|------|---------|---------|---------|
| 1  | C    | 2.8439  | -0.8711 | -0.3049 |
| 2  | N    | 3.9847  | -0.1832 | 0.2746  |
| 3  | C    | 3.7541  | 1.2846  | 0.3132  |
| 4  | C    | 5.3415  | -0.4707 | -0.2277 |
| 5  | C    | 6.0487  | 0.8982  | -0.2179 |
| 6  | C    | 4.9075  | 1.8920  | -0.4956 |
| 7  | H    | 3.8414  | 1.6207  | 1.3540  |
| 8  | C    | 2.7444  | -2.3403 | 0.0701  |
| 9  | C    | 2.4801  | -3.0993 | -1.0788 |
| 10 | N    | 2.4617  | -2.2588 | -2.2017 |
| 11 | C    | 2.8765  | -0.9806 | -1.8869 |
| 12 | C    | 2.9643  | -2.9875 | 1.2734  |
| 13 | C    | 2.8465  | -4.3805 | 1.3373  |
| 14 | C    | 2.5263  | -5.1122 | 0.1966  |
| 15 | C    | 2.3486  | -4.4794 | -1.0375 |
| 16 | O    | 3.2429  | -0.1481 | -2.6829 |
| 17 | H    | 5.8482  | -1.2051 | 0.4051  |
| 18 | H    | 5.3167  | -0.8690 | -1.2490 |
| 19 | H    | 6.4869  | 1.0902  | 0.7670  |
| 20 | H    | 6.8536  | 0.9493  | -0.9540 |
| 21 | H    | 5.1457  | 2.9144  | -0.1940 |
| 22 | H    | 4.6559  | 1.8877  | -1.5589 |
| 23 | H    | 3.2388  | -2.4191 | 2.1525  |
| 24 | H    | 2.4318  | -6.1905 | 0.2573  |
| 25 | H    | 2.1389  | -5.0518 | -1.9338 |
| 26 | C    | 0.3897  | -1.1439 | 2.0234  |
| 27 | C    | 1.3108  | -0.0138 | 1.6435  |
| 28 | C    | 1.6393  | 0.0912  | 0.1348  |
| 29 | C    | 0.3630  | -0.0930 | -0.7167 |
| 30 | C    | -0.8555 | -0.6997 | -0.0712 |
| 31 | C    | -0.6653 | -1.4854 | 1.1617  |
| 32 | C    | -1.4696 | -2.5931 | 1.4761  |
| 33 | C    | -1.2915 | -3.2882 | 2.6640  |
| 34 | C    | -2.0231 | -0.4329 | -0.7115 |
| 35 | H    | -1.8910 | 0.0519  | -1.6754 |
| 36 | C    | 2.3205  | 1.4769  | -0.2056 |
| 37 | H    | 2.3686  | 1.5016  | -1.2933 |
| 38 | O    | 0.3364  | 0.3069  | -1.8652 |
| 39 | H    | 0.8306  | 0.9273  | 1.9334  |
| 40 | H    | 2.2383  | -0.0766 | 2.2154  |
| 41 | H    | -2.2381 | -2.9064 | 0.7810  |
| 42 | H    | -1.9236 | -4.1390 | 2.8913  |
| 43 | C    | -0.2974 | -2.8910 | 3.5589  |
| 44 | H    | -0.1622 | -3.4197 | 4.4958  |
| 45 | C    | 0.5426  | -1.8343 | 3.2275  |
| 46 | H    | 1.3408  | -1.5467 | 3.9045  |
| 47 | H    | 3.0079  | -4.8919 | 2.2787  |
| 48 | C    | 1.5927  | 2.7338  | 0.2329  |
| 49 | C    | 0.7664  | 3.3762  | -0.6686 |
| 50 | C    | 1.7323  | 3.3007  | 1.5315  |
| 51 | C    | 0.0566  | 4.5566  | -0.3336 |
| 52 | H    | 0.6484  | 2.9640  | -1.6650 |
| 53 | C    | 1.0637  | 4.4461  | 1.8887  |
| 54 | H    | 2.3852  | 2.8306  | 2.2568  |

|    |   |         |         |         |
|----|---|---------|---------|---------|
| 55 | C | -0.7960 | 5.2138  | -1.2600 |
| 56 | C | 0.2053  | 5.1090  | 0.9762  |
| 57 | H | 1.1913  | 4.8610  | 2.8836  |
| 58 | C | -1.4683 | 6.3583  | -0.9073 |
| 59 | H | -0.9081 | 4.7939  | -2.2541 |
| 60 | C | -0.5019 | 6.2933  | 1.3090  |
| 61 | C | -1.3201 | 6.9040  | 0.3901  |
| 62 | H | -2.1173 | 6.8500  | -1.6234 |
| 63 | H | -0.3860 | 6.7101  | 2.3043  |
| 64 | H | -1.8566 | 7.8082  | 0.6550  |
| 65 | C | -3.4211 | -0.6348 | -0.3295 |
| 66 | C | -4.3651 | -0.7596 | -1.3371 |
| 67 | C | -3.8765 | -0.6170 | 1.0240  |
| 68 | C | -5.7431 | -0.9279 | -1.0608 |
| 69 | H | -4.0428 | -0.7379 | -2.3736 |
| 70 | C | -5.2053 | -0.7516 | 1.3218  |
| 71 | H | -3.1596 | -0.4726 | 1.8208  |
| 72 | C | -6.7082 | -1.0864 | -2.0899 |
| 73 | C | -6.1791 | -0.9267 | 0.3009  |
| 74 | H | -5.5340 | -0.7185 | 2.3554  |
| 75 | C | -8.0395 | -1.2398 | -1.7868 |
| 76 | H | -6.3764 | -1.0857 | -3.1230 |
| 77 | C | -7.5589 | -1.0841 | 0.5796  |
| 78 | C | -8.4691 | -1.2388 | -0.4397 |
| 79 | H | -8.7675 | -1.3614 | -2.5809 |
| 80 | H | -7.8882 | -1.0803 | 1.6135  |
| 81 | H | -9.5226 | -1.3594 | -0.2138 |
| 82 | H | 2.4836  | -2.5858 | -3.1568 |



**Ts5a**

|    | Atom | X       | Y       | Z       |
|----|------|---------|---------|---------|
| 1  | C    | 1.0213  | -2.2198 | -1.4017 |
| 2  | N    | 1.7463  | -1.4678 | -2.2570 |
| 3  | C    | 2.8494  | -0.7415 | -1.8979 |
| 4  | C    | 1.3273  | -1.1782 | -3.6675 |
| 5  | C    | 2.2291  | -0.0117 | -4.0765 |
| 6  | C    | 3.4483  | -0.1302 | -3.1426 |
| 7  | H    | 3.5025  | -1.1730 | -1.1553 |
| 8  | C    | 1.4653  | -2.9683 | -0.2406 |
| 9  | C    | 0.3559  | -3.7504 | 0.1841  |
| 10 | N    | -0.7120 | -3.5122 | -0.6650 |
| 11 | C    | -0.3816 | -2.6356 | -1.6929 |
| 12 | C    | 2.6762  | -3.1183 | 0.4460  |
| 13 | C    | 2.7608  | -4.0061 | 1.5217  |
| 14 | C    | 1.6499  | -4.7433 | 1.9283  |
| 15 | C    | 0.4314  | -4.6250 | 1.2547  |
| 16 | O    | -1.1285 | -2.3168 | -2.6009 |
| 17 | H    | 1.5247  | -2.0853 | -4.2481 |
| 18 | H    | 0.2675  | -0.9587 | -3.7006 |
| 19 | H    | 2.5002  | -0.0591 | -5.1319 |
| 20 | H    | 1.7009  | 0.9246  | -3.8956 |
| 21 | H    | 4.2104  | -0.7996 | -3.5606 |
| 22 | H    | 3.9359  | 0.8243  | -2.9369 |
| 23 | H    | 3.5647  | -2.5785 | 0.1494  |
| 24 | H    | 1.7301  | -5.4211 | 2.7701  |
| 25 | H    | -0.4318 | -5.2059 | 1.5576  |
| 26 | C    | -0.3485 | -0.5901 | 1.9179  |
| 27 | C    | 0.9670  | -0.0313 | 1.4305  |
| 28 | C    | 1.0105  | 0.3299  | -0.0284 |
| 29 | C    | -0.2242 | 0.5212  | -0.7839 |
| 30 | C    | -1.5264 | 0.4181  | -0.0340 |
| 31 | C    | -1.5412 | -0.3864 | 1.2024  |
| 32 | C    | -2.7091 | -1.0354 | 1.6465  |
| 33 | C    | -2.7154 | -1.7918 | 2.8088  |
| 34 | C    | -2.5591 | 1.0899  | -0.6000 |
| 35 | H    | -2.3332 | 1.4701  | -1.5928 |
| 36 | C    | 2.1820  | 0.7557  | -0.7020 |
| 37 | H    | 1.9239  | 1.3797  | -1.5523 |
| 38 | O    | -0.2039 | 0.8605  | -1.9745 |
| 39 | H    | 1.2374  | 0.8528  | 2.0296  |
| 40 | H    | 1.7358  | -0.7753 | 1.6594  |
| 41 | H    | -3.6162 | -0.9460 | 1.0639  |
| 42 | H    | -3.6307 | -2.2751 | 3.1323  |
| 43 | C    | -1.5424 | -1.9334 | 3.5525  |
| 44 | H    | -1.5378 | -2.5183 | 4.4655  |
| 45 | C    | -0.3706 | -1.3472 | 3.0936  |
| 46 | H    | 0.5548  | -1.4934 | 3.6415  |
| 47 | H    | 3.7043  | -4.1208 | 2.0424  |
| 48 | C    | 3.4258  | 1.2216  | -0.0241 |
| 49 | C    | 3.9468  | 2.4517  | -0.3857 |
| 50 | C    | 4.1303  | 0.4645  | 0.9565  |
| 51 | C    | 5.1256  | 2.9779  | 0.1990  |
| 52 | H    | 3.4317  | 3.0491  | -1.1316 |
| 53 | C    | 5.2788  | 0.9401  | 1.5377  |
| 54 | H    | 3.7605  | -0.5091 | 1.2497  |

|    |   |         |         |         |
|----|---|---------|---------|---------|
| 55 | C | 5.6499  | 4.2469  | -0.1636 |
| 56 | C | 5.8128  | 2.2061  | 1.1864  |
| 57 | H | 5.7963  | 0.3429  | 2.2816  |
| 58 | C | 6.7965  | 4.7265  | 0.4212  |
| 59 | H | 5.1274  | 4.8348  | -0.9111 |
| 60 | C | 6.9948  | 2.7290  | 1.7702  |
| 61 | C | 7.4764  | 3.9606  | 1.3973  |
| 62 | H | 7.1858  | 5.6976  | 0.1369  |
| 63 | H | 7.5137  | 2.1398  | 2.5192  |
| 64 | H | 8.3801  | 4.3517  | 1.8508  |
| 65 | C | -3.8967 | 1.4310  | -0.1064 |
| 66 | C | -4.9311 | 1.5656  | -1.0183 |
| 67 | C | -4.1652 | 1.7281  | 1.2645  |
| 68 | C | -6.2406 | 1.9316  | -0.6228 |
| 69 | H | -4.7401 | 1.3748  | -2.0698 |
| 70 | C | -5.4153 | 2.1057  | 1.6753  |
| 71 | H | -3.3573 | 1.6707  | 1.9823  |
| 72 | C | -7.3092 | 2.0428  | -1.5511 |
| 73 | C | -6.4953 | 2.2077  | 0.7570  |
| 74 | H | -5.5944 | 2.3416  | 2.7194  |
| 75 | C | -8.5676 | 2.4062  | -1.1356 |
| 76 | H | -7.1155 | 1.8337  | -2.5981 |
| 77 | C | -7.8029 | 2.5830  | 1.1525  |
| 78 | C | -8.8176 | 2.6791  | 0.2292  |
| 79 | H | -9.3754 | 2.4860  | -1.8544 |
| 80 | H | -7.9924 | 2.7944  | 2.1999  |
| 81 | H | -9.8145 | 2.9661  | 0.5444  |
| 82 | H | -1.6348 | -3.9070 | -0.5832 |

Prod4b

|    | Atom | X       | Y       | Z       |
|----|------|---------|---------|---------|
| 1  | C    | 1.5844  | -1.3724 | -0.3068 |
| 2  | N    | 2.7427  | -1.3745 | -1.2001 |
| 3  | C    | 3.3947  | -0.0593 | -1.0791 |
| 4  | C    | 2.6138  | -1.6832 | -2.6363 |
| 5  | C    | 3.9625  | -1.1957 | -3.1698 |
| 6  | C    | 4.2201  | 0.1057  | -2.3762 |
| 7  | H    | 4.0296  | -0.0585 | -0.1941 |
| 8  | C    | 0.6029  | -2.5076 | -0.5856 |
| 9  | C    | 0.6983  | -3.4555 | 0.4447  |
| 10 | N    | 1.6310  | -3.0281 | 1.3909  |
| 11 | C    | 2.1849  | -1.8122 | 1.0769  |
| 12 | C    | -0.2618 | -2.7552 | -1.6438 |
| 13 | C    | -1.0257 | -3.9282 | -1.6514 |
| 14 | C    | -0.9199 | -4.8491 | -0.6132 |
| 15 | C    | -0.0494 | -4.6236 | 0.4552  |
| 16 | O    | 3.0164  | -1.2322 | 1.7438  |
| 17 | H    | 2.4578  | -2.7524 | -2.7867 |
| 18 | H    | 1.7933  | -1.1378 | -3.1207 |
| 19 | H    | 4.7341  | -1.9355 | -2.9417 |
| 20 | H    | 3.9498  | -1.0402 | -4.2508 |
| 21 | H    | 5.2808  | 0.2556  | -2.1690 |
| 22 | H    | 3.8745  | 0.9789  | -2.9354 |
| 23 | H    | -0.3556 | -2.0514 | -2.4592 |
| 24 | H    | -1.5169 | -5.7539 | -0.6305 |
| 25 | H    | 0.0398  | -5.3389 | 1.2646  |
| 26 | C    | -0.5137 | -0.1226 | 1.7277  |
| 27 | C    | 0.6624  | 0.6390  | 1.1786  |
| 28 | C    | 1.0462  | 0.1596  | -0.2427 |
| 29 | C    | -0.2073 | 0.2881  | -1.1409 |
| 30 | C    | -1.5594 | 0.2675  | -0.4716 |
| 31 | C    | -1.6266 | -0.3017 | 0.8889  |
| 32 | C    | -2.7069 | -1.0732 | 1.3399  |
| 33 | C    | -2.7069 | -1.6065 | 2.6228  |
| 34 | C    | -2.5704 | 0.7925  | -1.2082 |
| 35 | H    | -2.2895 | 1.0301  | -2.2313 |
| 36 | C    | -3.9536 | 1.1339  | -0.8735 |
| 37 | C    | 2.2352  | 0.9650  | -0.8981 |
| 38 | C    | 2.6494  | 2.2618  | -0.2337 |
| 39 | H    | 1.8854  | 1.2136  | -1.9008 |
| 40 | O    | -0.1065 | 0.4241  | -2.3486 |
| 41 | C    | -4.3910 | 1.4916  | 0.4149  |
| 42 | C    | -5.7070 | 1.8648  | 0.6414  |
| 43 | C    | -6.6502 | 1.8899  | -0.3957 |
| 44 | C    | -6.2152 | 1.5520  | -1.6795 |
| 45 | C    | -4.8920 | 1.1979  | -1.9170 |
| 46 | C    | 3.4267  | 2.2999  | 0.9331  |
| 47 | C    | 3.8028  | 3.5114  | 1.5036  |
| 48 | C    | 3.4246  | 4.7336  | 0.9366  |
| 49 | C    | 2.6496  | 4.6970  | -0.2242 |
| 50 | C    | 2.2727  | 3.4848  | -0.7986 |
| 51 | H    | 0.4095  | 1.7032  | 1.1092  |
| 52 | H    | 1.5134  | 0.5669  | 1.8500  |
| 53 | H    | -3.5433 | -1.2600 | 0.6783  |
| 54 | H    | -3.5489 | -2.2014 | 2.9584  |

|    |   |         |         |         |
|----|---|---------|---------|---------|
| 55 | H | -3.6888 | 1.4953  | 1.2380  |
| 56 | H | -6.0109 | 2.1499  | 1.6438  |
| 57 | H | -6.9168 | 1.5796  | -2.5068 |
| 58 | H | -4.5745 | 0.9607  | -2.9270 |
| 59 | H | 3.7315  | 1.3741  | 1.4080  |
| 60 | H | 4.4022  | 3.5070  | 2.4091  |
| 61 | H | 2.3378  | 5.6272  | -0.6892 |
| 62 | H | 1.6732  | 3.4879  | -1.7036 |
| 63 | C | -1.6214 | -1.3864 | 3.4714  |
| 64 | H | -1.6217 | -1.7973 | 4.4750  |
| 65 | C | -0.5266 | -0.6566 | 3.0173  |
| 66 | H | 0.3342  | -0.5065 | 3.6605  |
| 67 | C | 3.8644  | 6.0429  | 1.5464  |
| 68 | H | 3.8360  | 6.0038  | 2.6385  |
| 69 | H | 4.8925  | 6.2875  | 1.2571  |
| 70 | H | 3.2271  | 6.8681  | 1.2210  |
| 71 | C | -8.0854 | 2.2666  | -0.1258 |
| 72 | H | -8.6205 | 2.4890  | -1.0511 |
| 73 | H | -8.6173 | 1.4512  | 0.3765  |
| 74 | H | -8.1514 | 3.1435  | 0.5239  |
| 75 | H | -1.7030 | -4.1180 | -2.4756 |
| 76 | H | 1.8972  | -3.5335 | 2.2219  |

TS4b

|    | Atom | X       | Y       | Z       |
|----|------|---------|---------|---------|
| 1  | C    | -1.0511 | 2.1580  | -0.4598 |
| 2  | N    | -1.9222 | 1.8060  | -1.4346 |
| 3  | C    | -3.0221 | 1.0284  | -1.2222 |
| 4  | C    | -1.7095 | 2.0932  | -2.8802 |
| 5  | C    | -2.8036 | 1.2790  | -3.5840 |
| 6  | C    | -3.8460 | 1.0012  | -2.4840 |
| 7  | H    | -3.4735 | 1.1148  | -0.2456 |
| 8  | C    | 0.2217  | 2.8413  | -0.5789 |
| 9  | C    | 0.6144  | 3.1854  | 0.7422  |
| 10 | N    | -0.3759 | 2.7793  | 1.6241  |
| 11 | C    | -1.4240 | 2.1464  | 0.9717  |
| 12 | C    | 1.0856  | 3.1660  | -1.6322 |
| 13 | C    | 2.2863  | 3.8207  | -1.3609 |
| 14 | C    | 2.6452  | 4.1509  | -0.0533 |
| 15 | C    | 1.8085  | 3.8316  | 1.0177  |
| 16 | O    | -2.4344 | 1.7233  | 1.5319  |
| 17 | H    | -1.8165 | 3.1725  | -3.0258 |
| 18 | H    | -0.7168 | 1.7724  | -3.1747 |
| 19 | H    | -3.2212 | 1.8132  | -4.4382 |
| 20 | H    | -2.3757 | 0.3428  | -3.9443 |
| 21 | H    | -4.6091 | 1.7883  | -2.4448 |
| 22 | H    | -4.3697 | 0.0528  | -2.6149 |
| 23 | H    | 0.8446  | 2.9149  | -2.6542 |
| 24 | H    | 3.5838  | 4.6587  | 0.1366  |
| 25 | H    | 2.0848  | 4.0780  | 2.0362  |
| 26 | C    | 0.3624  | -0.6768 | 1.9037  |
| 27 | C    | -0.9575 | -1.0780 | 1.2930  |
| 28 | C    | -1.0954 | -0.7719 | -0.1734 |
| 29 | C    | 0.0864  | -0.5675 | -1.0034 |
| 30 | C    | 1.4288  | -0.7555 | -0.3461 |
| 31 | C    | 1.5097  | -0.5135 | 1.1090  |
| 32 | C    | 2.6838  | -0.0290 | 1.7139  |
| 33 | C    | 2.7420  | 0.2156  | 3.0777  |
| 34 | C    | 2.4244  | -1.1357 | -1.1829 |
| 35 | H    | 2.1425  | -1.1041 | -2.2325 |
| 36 | C    | 3.7863  | -1.6217 | -0.9357 |
| 37 | C    | -2.3160 | -0.8799 | -0.8693 |
| 38 | C    | -3.5271 | -1.5670 | -0.3367 |
| 39 | H    | -2.1542 | -1.0598 | -1.9285 |
| 40 | O    | -0.0010 | -0.3447 | -2.2207 |
| 41 | C    | 4.1478  | -2.4022 | 0.1767  |
| 42 | C    | 5.4387  | -2.8906 | 0.3178  |
| 43 | C    | 6.4310  | -2.6213 | -0.6344 |
| 44 | C    | 6.0706  | -1.8621 | -1.7502 |
| 45 | C    | 4.7733  | -1.3853 | -1.9058 |
| 46 | C    | -4.1852 | -1.2007 | 0.8477  |
| 47 | C    | -5.3144 | -1.8892 | 1.2785  |
| 48 | C    | -5.8367 | -2.9660 | 0.5540  |
| 49 | C    | -5.1925 | -3.3206 | -0.6339 |
| 50 | C    | -4.0659 | -2.6316 | -1.0735 |
| 51 | H    | -1.1297 | -2.1544 | 1.4523  |
| 52 | H    | -1.7480 | -0.5710 | 1.8509  |
| 53 | H    | 3.5524  | 0.1657  | 1.0994  |
| 54 | H    | 3.6603  | 0.5860  | 3.5198  |

|    |   |         |         |         |
|----|---|---------|---------|---------|
| 55 | H | 3.4033  | -2.6412 | 0.9254  |
| 56 | H | 5.6820  | -3.5015 | 1.1819  |
| 57 | H | 6.8114  | -1.6510 | -2.5150 |
| 58 | H | 4.5153  | -0.8137 | -2.7913 |
| 59 | H | -3.8291 | -0.3549 | 1.4235  |
| 60 | H | -5.8047 | -1.5765 | 2.1953  |
| 61 | H | -5.5780 | -4.1440 | -1.2271 |
| 62 | H | -3.5863 | -2.9303 | -2.0001 |
| 63 | C | 1.6161  | -0.0062 | 3.8737  |
| 64 | H | 1.6551  | 0.1737  | 4.9425  |
| 65 | C | 0.4360  | -0.4362 | 3.2801  |
| 66 | H | -0.4546 | -0.5754 | 3.8849  |
| 67 | C | 7.8389  | -3.1322 | -0.4520 |
| 68 | H | 7.8451  | -4.1682 | -0.1023 |
| 69 | H | 8.4036  | -3.0871 | -1.3856 |
| 70 | H | 8.3814  | -2.5369 | 0.2909  |
| 71 | C | -7.0428 | -3.7265 | 1.0491  |
| 72 | H | -7.7562 | -3.0639 | 1.5456  |
| 73 | H | -7.5612 | -4.2300 | 0.2301  |
| 74 | H | -6.7529 | -4.4944 | 1.7750  |
| 75 | H | 2.9508  | 4.0705  | -2.1796 |
| 76 | H | -0.3127 | 2.7956  | 2.6293  |

Prod5b

|    | Atom | X       | Y       | Z       |
|----|------|---------|---------|---------|
| 1  | C    | 2.3535  | -0.5770 | -0.1618 |
| 2  | N    | 3.4063  | 0.1571  | 0.5191  |
| 3  | C    | 3.1479  | 1.6202  | 0.4685  |
| 4  | C    | 4.8178  | -0.1209 | 0.1941  |
| 5  | C    | 5.4961  | 1.2620  | 0.2333  |
| 6  | C    | 4.3806  | 2.2198  | -0.2201 |
| 7  | H    | 3.1019  | 1.9985  | 1.4973  |
| 8  | C    | 2.2301  | -2.0317 | 0.2606  |
| 9  | C    | 2.1177  | -2.8414 | -0.8787 |
| 10 | N    | 2.2259  | -2.0479 | -2.0300 |
| 11 | C    | 2.5789  | -0.7496 | -1.7222 |
| 12 | C    | 2.3082  | -2.6255 | 1.5082  |
| 13 | C    | 2.2002  | -4.0167 | 1.6165  |
| 14 | C    | 2.0312  | -4.7995 | 0.4775  |
| 15 | C    | 1.9986  | -4.2207 | -0.7948 |
| 16 | O    | 3.0288  | 0.0563  | -2.5026 |
| 17 | H    | 5.2570  | -0.8200 | 0.9119  |
| 18 | H    | 4.9226  | -0.5578 | -0.8061 |
| 19 | H    | 5.8084  | 1.5010  | 1.2552  |
| 20 | H    | 6.3834  | 1.3018  | -0.4019 |
| 21 | H    | 4.5636  | 3.2580  | 0.0655  |
| 22 | H    | 4.2594  | 2.1685  | -1.3048 |
| 23 | H    | 2.4654  | -2.0172 | 2.3894  |
| 24 | H    | 1.9427  | -5.8760 | 0.5720  |
| 25 | H    | 1.9068  | -4.8326 | -1.6849 |
| 26 | C    | -0.3602 | -0.7881 | 1.8817  |
| 27 | C    | 0.5970  | 0.3298  | 1.5589  |
| 28 | C    | 1.0908  | 0.3760  | 0.0931  |
| 29 | C    | -0.0755 | 0.1295  | -0.8898 |
| 30 | C    | -1.3638 | -0.4380 | -0.3552 |
| 31 | C    | -1.3153 | -1.1684 | 0.9257  |
| 32 | C    | -2.1520 | -2.2631 | 1.1971  |
| 33 | C    | -2.1048 | -2.9082 | 2.4247  |
| 34 | C    | -2.4516 | -0.1882 | -1.1279 |
| 35 | H    | -2.2091 | 0.2570  | -2.0896 |
| 36 | C    | -3.8867 | -0.3628 | -0.8961 |
| 37 | C    | 1.7851  | 1.7620  | -0.2263 |
| 38 | C    | 0.9889  | 3.0193  | 0.0671  |
| 39 | H    | 1.9632  | 1.7413  | -1.3009 |
| 40 | O    | 0.0363  | 0.4534  | -2.0571 |
| 41 | C    | -4.4961 | -0.2845 | 0.3693  |
| 42 | C    | -5.8721 | -0.3886 | 0.5042  |
| 43 | C    | -6.7040 | -0.5867 | -0.6069 |
| 44 | C    | -6.1035 | -0.6473 | -1.8668 |
| 45 | C    | -4.7265 | -0.5205 | -2.0109 |
| 46 | C    | 0.2188  | 3.5868  | -0.9591 |
| 47 | C    | -0.5302 | 4.7387  | -0.7498 |
| 48 | C    | -0.5375 | 5.3837  | 0.4918  |
| 49 | C    | 0.2330  | 4.8263  | 1.5133  |
| 50 | C    | 0.9814  | 3.6681  | 1.3074  |
| 51 | H    | 0.0885  | 1.2803  | 1.7547  |
| 52 | H    | 1.4555  | 0.2952  | 2.2317  |
| 53 | H    | -2.8439 | -2.6040 | 0.4376  |
| 54 | H    | -2.7599 | -3.7503 | 2.6175  |

|    |   |         |         |         |
|----|---|---------|---------|---------|
| 55 | H | -3.8866 | -0.1207 | 1.2483  |
| 56 | H | -6.3145 | -0.3086 | 1.4923  |
| 57 | H | -6.7219 | -0.7808 | -2.7485 |
| 58 | H | -4.2871 | -0.5486 | -3.0026 |
| 59 | H | 0.2076  | 3.1077  | -1.9314 |
| 60 | H | -1.1161 | 5.1469  | -1.5678 |
| 61 | H | 0.2528  | 5.3038  | 2.4881  |
| 62 | H | 1.5678  | 3.2791  | 2.1314  |
| 63 | C | -1.2119 | -2.4727 | 3.4049  |
| 64 | H | -1.1799 | -2.9620 | 4.3720  |
| 65 | C | -0.3395 | -1.4284 | 3.1230  |
| 66 | H | 0.3812  | -1.1106 | 3.8699  |
| 67 | C | -8.1958 | -0.7327 | -0.4395 |
| 68 | H | -8.7184 | -0.6051 | -1.3896 |
| 69 | H | -8.4520 | -1.7247 | -0.0516 |
| 70 | H | -8.5911 | 0.0022  | 0.2670  |
| 71 | C | -1.3311 | 6.6500  | 0.7051  |
| 72 | H | -1.4218 | 6.8893  | 1.7668  |
| 73 | H | -0.8525 | 7.5038  | 0.2133  |
| 74 | H | -2.3395 | 6.5623  | 0.2914  |
| 75 | H | 2.2508  | -4.4862 | 2.5916  |
| 76 | H | 2.3669  | -2.4125 | -2.9609 |



TS5b

|    | Atom | X       | Y       | Z       |
|----|------|---------|---------|---------|
| 1  | C    | 1.1647  | 1.7253  | 1.3696  |
| 2  | N    | 1.8910  | 0.9105  | 2.1649  |
| 3  | C    | 2.9004  | 0.1015  | 1.7189  |
| 4  | C    | 1.5592  | 0.6425  | 3.6022  |
| 5  | C    | 2.3951  | -0.5947 | 3.9376  |
| 6  | C    | 3.5445  | -0.5640 | 2.9126  |
| 7  | H    | 3.5254  | 0.4839  | 0.9270  |
| 8  | C    | 1.5774  | 2.4450  | 0.1793  |
| 9  | C    | 0.5060  | 3.3183  | -0.1564 |
| 10 | N    | -0.5088 | 3.1603  | 0.7726  |
| 11 | C    | -0.1726 | 2.2501  | 1.7694  |
| 12 | C    | 2.7385  | 2.4999  | -0.6010 |
| 13 | C    | 2.8117  | 3.3867  | -1.6785 |
| 14 | C    | 1.7373  | 4.2164  | -1.9949 |
| 15 | C    | 0.5695  | 4.1927  | -1.2280 |
| 16 | O    | -0.8712 | 1.9853  | 2.7319  |
| 17 | H    | 1.8705  | 1.5261  | 4.1691  |
| 18 | H    | 0.4910  | 0.5059  | 3.7156  |
| 19 | H    | 2.7491  | -0.5778 | 4.9692  |
| 20 | H    | 1.7824  | -1.4851 | 3.7953  |
| 21 | H    | 4.3859  | 0.0416  | 3.2718  |
| 22 | H    | 3.9391  | -1.5518 | 2.6688  |
| 23 | H    | 3.5991  | 1.8850  | -0.3775 |
| 24 | H    | 1.8070  | 4.8922  | -2.8393 |
| 25 | H    | -0.2643 | 4.8443  | -1.4614 |
| 26 | C    | -0.5723 | 0.2383  | -1.8405 |
| 27 | C    | 0.7290  | -0.4235 | -1.4542 |
| 28 | C    | 0.8499  | -0.8059 | -0.0057 |
| 29 | C    | -0.3373 | -0.9074 | 0.8391  |
| 30 | C    | -1.6793 | -0.6989 | 0.1879  |
| 31 | C    | -1.7222 | 0.1176  | -1.0415 |
| 32 | C    | -2.8658 | 0.8577  | -1.3969 |
| 33 | C    | -2.8972 | 1.6265  | -2.5502 |
| 34 | C    | -2.7139 | -1.3022 | 0.8220  |
| 35 | H    | -2.4426 | -1.7146 | 1.7907  |
| 36 | C    | -4.1080 | -1.5378 | 0.4303  |
| 37 | C    | 2.0319  | -1.3274 | 0.5753  |
| 38 | C    | 3.1786  | -1.8863 | -0.1980 |
| 39 | H    | 1.7897  | -1.9359 | 1.4416  |
| 40 | O    | -0.2546 | -1.2576 | 2.0237  |
| 41 | C    | -4.5107 | -1.8134 | -0.8883 |
| 42 | C    | -5.8352 | -2.1010 | -1.1858 |
| 43 | C    | -6.8204 | -2.1208 | -0.1896 |
| 44 | C    | -6.4203 | -1.8655 | 1.1244  |
| 45 | C    | -5.0909 | -1.5951 | 1.4312  |
| 46 | C    | 3.6262  | -3.1772 | 0.1252  |
| 47 | C    | 4.6893  | -3.7695 | -0.5475 |
| 48 | C    | 5.3660  | -3.0944 | -1.5675 |
| 49 | C    | 4.9309  | -1.8054 | -1.8872 |
| 50 | C    | 3.8640  | -1.2116 | -1.2189 |
| 51 | H    | 0.8902  | -1.3172 | -2.0780 |
| 52 | H    | 1.5335  | 0.2642  | -1.7315 |
| 53 | H    | -3.7347 | 0.8262  | -0.7534 |
| 54 | H    | -3.7939 | 2.1813  | -2.8039 |

|    |   |         |         |         |
|----|---|---------|---------|---------|
| 55 | H | -3.7729 | -1.8192 | -1.6809 |
| 56 | H | -6.1113 | -2.3232 | -2.2121 |
| 57 | H | -7.1564 | -1.8906 | 1.9218  |
| 58 | H | -4.8035 | -1.4178 | 2.4622  |
| 59 | H | 3.1164  | -3.7310 | 0.9067  |
| 60 | H | 4.9962  | -4.7747 | -0.2756 |
| 61 | H | 5.4337  | -1.2536 | -2.6754 |
| 62 | H | 3.5696  | -0.2090 | -1.5018 |
| 63 | C | -1.7730 | 1.6884  | -3.3761 |
| 64 | H | -1.7890 | 2.2823  | -4.2831 |
| 65 | C | -0.6202 | 1.0095  | -3.0067 |
| 66 | H | 0.2726  | 1.0919  | -3.6184 |
| 67 | C | 6.5407  | -3.7234 | -2.2762 |
| 68 | H | 7.4752  | -3.5326 | -1.7367 |
| 69 | H | 6.4255  | -4.8071 | -2.3537 |
| 70 | H | 6.6588  | -3.3226 | -3.2855 |
| 71 | C | -8.2629 | -2.4018 | -0.5313 |
| 72 | H | -8.3494 | -3.2073 | -1.2656 |
| 73 | H | -8.8339 | -2.6887 | 0.3543  |
| 74 | H | -8.7457 | -1.5176 | -0.9624 |
| 75 | H | 3.7174  | 3.4270  | -2.2722 |
| 76 | H | -1.4005 | 3.6281  | 0.7631  |

TS4c

|    | Atom | X       | Y       | Z       |
|----|------|---------|---------|---------|
| 1  | C    | -1.0576 | 2.1383  | -0.4831 |
| 2  | N    | -1.9179 | 1.7723  | -1.4616 |
| 3  | C    | -3.0196 | 0.9974  | -1.2514 |
| 4  | C    | -1.6926 | 2.0449  | -2.9087 |
| 5  | C    | -2.7735 | 1.2147  | -3.6137 |
| 6  | C    | -3.8278 | 0.9486  | -2.5224 |
| 7  | H    | -3.4820 | 1.0967  | -0.2812 |
| 8  | C    | 0.2111  | 2.8305  | -0.5971 |
| 9  | C    | 0.5889  | 3.1894  | 0.7243  |
| 10 | N    | -0.4055 | 2.7818  | 1.6013  |
| 11 | C    | -1.4427 | 2.1363  | 0.9458  |
| 12 | C    | 1.0809  | 3.1545  | -1.6457 |
| 13 | C    | 2.2732  | 3.8222  | -1.3695 |
| 14 | C    | 2.6176  | 4.1664  | -0.0616 |
| 15 | C    | 1.7746  | 3.8487  | 1.0048  |
| 16 | O    | -2.4551 | 1.7101  | 1.5003  |
| 17 | H    | -1.8067 | 3.1217  | -3.0667 |
| 18 | H    | -0.6946 | 1.7289  | -3.1895 |
| 19 | H    | -3.1831 | 1.7339  | -4.4807 |
| 20 | H    | -2.3359 | 0.2756  | -3.9540 |
| 21 | H    | -4.5948 | 1.7327  | -2.5037 |
| 22 | H    | -4.3465 | -0.0035 | -2.6467 |
| 23 | H    | 0.8505  | 2.8943  | -2.6679 |
| 24 | H    | 3.5495  | 4.6849  | 0.1321  |
| 25 | H    | 2.0394  | 4.1071  | 2.0234  |
| 26 | C    | 0.3701  | -0.6644 | 1.9112  |
| 27 | C    | -0.9484 | -1.0799 | 1.3066  |
| 28 | C    | -1.0903 | -0.7898 | -0.1630 |
| 29 | C    | 0.0891  | -0.5919 | -0.9972 |
| 30 | C    | 1.4335  | -0.7638 | -0.3388 |
| 31 | C    | 1.5150  | -0.5021 | 1.1128  |
| 32 | C    | 2.6867  | -0.0024 | 1.7099  |
| 33 | C    | 2.7460  | 0.2564  | 3.0710  |
| 34 | C    | 2.4287  | -1.1523 | -1.1712 |
| 35 | H    | 2.1460  | -1.1390 | -2.2210 |
| 36 | C    | 3.7931  | -1.6289 | -0.9156 |
| 37 | C    | -2.3105 | -0.9097 | -0.8562 |
| 38 | C    | -3.5212 | -1.5859 | -0.3086 |
| 39 | H    | -2.1514 | -1.1062 | -1.9128 |
| 40 | O    | -0.0002 | -0.3871 | -2.2173 |
| 41 | C    | 4.1495  | -2.3956 | 0.2081  |
| 42 | C    | 5.4414  | -2.8789 | 0.3702  |
| 43 | C    | 6.3924  | -2.5925 | -0.5995 |
| 44 | C    | 6.0826  | -1.8565 | -1.7320 |
| 45 | C    | 4.7808  | -1.3930 | -1.8877 |
| 46 | C    | -4.1764 | -1.1872 | 0.8679  |
| 47 | C    | -5.3041 | -1.8617 | 1.3264  |
| 48 | C    | -5.7836 | -2.9419 | 0.6017  |
| 49 | C    | -5.1764 | -3.3603 | -0.5712 |
| 50 | C    | -4.0526 | -2.6728 | -1.0204 |
| 51 | H    | -1.1129 | -2.1558 | 1.4773  |
| 52 | H    | -1.7404 | -0.5723 | 1.8615  |
| 53 | H    | 3.5522  | 0.1944  | 1.0915  |
| 54 | H    | 3.6622  | 0.6384  | 3.5074  |

|    |   |         |         |         |
|----|---|---------|---------|---------|
| 55 | H | 3.4027  | -2.6268 | 0.9562  |
| 56 | H | 5.7182  | -3.4782 | 1.2288  |
| 57 | H | 6.8479  | -1.6654 | -2.4739 |
| 58 | H | 4.5216  | -0.8288 | -2.7767 |
| 59 | H | -3.8178 | -0.3275 | 1.4204  |
| 60 | H | -5.8157 | -1.5555 | 2.2306  |
| 61 | H | -5.5818 | -4.2048 | -1.1147 |
| 62 | H | -3.5681 | -2.9949 | -1.9358 |
| 63 | C | 1.6235  | 0.0340  | 3.8714  |
| 64 | H | 1.6637  | 0.2243  | 4.9383  |
| 65 | C | 0.4450  | -0.4098 | 3.2849  |
| 66 | H | -0.4430 | -0.5492 | 3.8934  |
| 67 | H | 2.9421  | 4.0724  | -2.1845 |
| 68 | F | 7.6522  | -3.0570 | -0.4405 |
| 69 | F | -6.8791 | -3.5989 | 1.0463  |
| 70 | H | -0.3557 | 2.8163  | 2.6068  |

Prod5c

|    | Atom | X       | Y       | Z       |
|----|------|---------|---------|---------|
| 1  | C    | 1.1656  | 1.6898  | 1.3931  |
| 2  | N    | 1.8906  | 0.8595  | 2.1724  |
| 3  | C    | 2.9034  | 0.0626  | 1.7133  |
| 4  | C    | 1.5575  | 0.5629  | 3.6044  |
| 5  | C    | 2.3943  | -0.6797 | 3.9163  |
| 6  | C    | 3.5454  | -0.6270 | 2.8941  |
| 7  | H    | 3.5288  | 0.4620  | 0.9303  |
| 8  | C    | 1.5793  | 2.4338  | 0.2182  |
| 9  | C    | 0.5079  | 3.3132  | -0.1006 |
| 10 | N    | -0.5086 | 3.1352  | 0.8231  |
| 11 | C    | -0.1737 | 2.2054  | 1.8015  |
| 12 | C    | 2.7421  | 2.5063  | -0.5584 |
| 13 | C    | 2.8165  | 3.4155  | -1.6168 |
| 14 | C    | 1.7416  | 4.2504  | -1.9177 |
| 15 | C    | 0.5725  | 4.2098  | -1.1536 |
| 16 | O    | -0.8733 | 1.9188  | 2.7565  |
| 17 | H    | 1.8676  | 1.4358  | 4.1881  |
| 18 | H    | 0.4893  | 0.4234  | 3.7139  |
| 19 | H    | 2.7467  | -0.6828 | 4.9484  |
| 20 | H    | 1.7830  | -1.5679 | 3.7556  |
| 21 | H    | 4.3859  | -0.0287 | 3.2672  |
| 22 | H    | 3.9414  | -1.6095 | 2.6317  |
| 23 | H    | 3.6040  | 1.8897  | -0.3443 |
| 24 | H    | 1.8123  | 4.9441  | -2.7473 |
| 25 | H    | -0.2610 | 4.8661  | -1.3745 |
| 26 | C    | -0.5781 | 0.2676  | -1.8434 |
| 27 | C    | 0.7260  | -0.3981 | -1.4729 |
| 28 | C    | 0.8499  | -0.8131 | -0.0336 |
| 29 | C    | -0.3342 | -0.9323 | 0.8122  |
| 30 | C    | -1.6785 | -0.7073 | 0.1704  |
| 31 | C    | -1.7250 | 0.1331  | -1.0426 |
| 32 | C    | -2.8693 | 0.8808  | -1.3798 |
| 33 | C    | -2.9051 | 1.6697  | -2.5193 |
| 34 | C    | -2.7106 | -1.3219 | 0.7965  |
| 35 | H    | -2.4365 | -1.7558 | 1.7548  |
| 36 | C    | -4.1071 | -1.5455 | 0.4039  |
| 37 | C    | 2.0327  | -1.3458 | 0.5345  |
| 38 | C    | 3.1779  | -1.8871 | -0.2528 |
| 39 | H    | 1.7936  | -1.9717 | 1.3890  |
| 40 | O    | -0.2490 | -1.3093 | 1.9883  |
| 41 | C    | -4.5070 | -1.8011 | -0.9197 |
| 42 | C    | -5.8322 | -2.0762 | -1.2316 |
| 43 | C    | -6.7724 | -2.0937 | -0.2106 |
| 44 | C    | -6.4215 | -1.8648 | 1.1103  |
| 45 | C    | -5.0878 | -1.6072 | 1.4090  |
| 46 | C    | 3.6274  | -3.1841 | 0.0469  |
| 47 | C    | 4.6908  | -3.7685 | -0.6336 |
| 48 | C    | 5.3251  | -3.0390 | -1.6263 |
| 49 | C    | 4.9255  | -1.7520 | -1.9498 |
| 50 | C    | 3.8571  | -1.1849 | -1.2610 |
| 51 | H    | 0.8908  | -1.2756 | -2.1184 |
| 52 | H    | 1.5261  | 0.3012  | -1.7342 |
| 53 | H    | -3.7348 | 0.8412  | -0.7323 |
| 54 | H    | -3.8019 | 2.2302  | -2.7591 |

|    |   |         |         |         |
|----|---|---------|---------|---------|
| 55 | H | -3.7685 | -1.7971 | -1.7109 |
| 56 | H | -6.1438 | -2.2838 | -2.2479 |
| 57 | H | -7.1810 | -1.9001 | 1.8814  |
| 58 | H | -4.7971 | -1.4404 | 2.4403  |
| 59 | H | 3.1223  | -3.7520 | 0.8203  |
| 60 | H | 5.0286  | -4.7718 | -0.4054 |
| 61 | H | 5.4486  | -1.2100 | -2.7279 |
| 62 | H | 3.5594  | -0.1767 | -1.5175 |
| 63 | C | -1.7844 | 1.7442  | -3.3490 |
| 64 | H | -1.8040 | 2.3531  | -4.2459 |
| 65 | C | -0.6305 | 1.0586  | -2.9962 |
| 66 | H | 0.2595  | 1.1510  | -3.6104 |
| 67 | H | 3.7235  | 3.4702  | -2.2073 |
| 68 | F | -8.0642 | -2.3551 | -0.5130 |
| 69 | F | 6.3618  | -3.5935 | -2.2927 |
| 70 | H | -1.3985 | 3.6068  | 0.8245  |

TS5c

|    | Atom | X       | Y       | Z       |
|----|------|---------|---------|---------|
| 1  | C    | 1.1656  | 1.6898  | 1.3931  |
| 2  | N    | 1.8906  | 0.8595  | 2.1724  |
| 3  | C    | 2.9034  | 0.0626  | 1.7133  |
| 4  | C    | 1.5575  | 0.5629  | 3.6044  |
| 5  | C    | 2.3943  | -0.6797 | 3.9163  |
| 6  | C    | 3.5454  | -0.6270 | 2.8941  |
| 7  | H    | 3.5288  | 0.4620  | 0.9303  |
| 8  | C    | 1.5793  | 2.4338  | 0.2182  |
| 9  | C    | 0.5079  | 3.3132  | -0.1006 |
| 10 | N    | -0.5086 | 3.1352  | 0.8231  |
| 11 | C    | -0.1737 | 2.2054  | 1.8015  |
| 12 | C    | 2.7421  | 2.5063  | -0.5584 |
| 13 | C    | 2.8165  | 3.4155  | -1.6168 |
| 14 | C    | 1.7416  | 4.2504  | -1.9177 |
| 15 | C    | 0.5725  | 4.2098  | -1.1536 |
| 16 | O    | -0.8733 | 1.9188  | 2.7565  |
| 17 | H    | 1.8676  | 1.4358  | 4.1881  |
| 18 | H    | 0.4893  | 0.4234  | 3.7139  |
| 19 | H    | 2.7467  | -0.6828 | 4.9484  |
| 20 | H    | 1.7830  | -1.5679 | 3.7556  |
| 21 | H    | 4.3859  | -0.0287 | 3.2672  |
| 22 | H    | 3.9414  | -1.6095 | 2.6317  |
| 23 | H    | 3.6040  | 1.8897  | -0.3443 |
| 24 | H    | 1.8123  | 4.9441  | -2.7473 |
| 25 | H    | -0.2610 | 4.8661  | -1.3745 |
| 26 | C    | -0.5781 | 0.2676  | -1.8434 |
| 27 | C    | 0.7260  | -0.3981 | -1.4729 |
| 28 | C    | 0.8499  | -0.8131 | -0.0336 |
| 29 | C    | -0.3342 | -0.9323 | 0.8122  |
| 30 | C    | -1.6785 | -0.7073 | 0.1704  |
| 31 | C    | -1.7250 | 0.1331  | -1.0426 |
| 32 | C    | -2.8693 | 0.8808  | -1.3798 |
| 33 | C    | -2.9051 | 1.6697  | -2.5193 |
| 34 | C    | -2.7106 | -1.3219 | 0.7965  |
| 35 | H    | -2.4365 | -1.7558 | 1.7548  |
| 36 | C    | -4.1071 | -1.5455 | 0.4039  |
| 37 | C    | 2.0327  | -1.3458 | 0.5345  |
| 38 | C    | 3.1779  | -1.8871 | -0.2528 |
| 39 | H    | 1.7936  | -1.9717 | 1.3890  |
| 40 | O    | -0.2490 | -1.3093 | 1.9883  |
| 41 | C    | -4.5070 | -1.8011 | -0.9197 |
| 42 | C    | -5.8322 | -2.0762 | -1.2316 |
| 43 | C    | -6.7724 | -2.0937 | -0.2106 |
| 44 | C    | -6.4215 | -1.8648 | 1.1103  |
| 45 | C    | -5.0878 | -1.6072 | 1.4090  |
| 46 | C    | 3.6274  | -3.1841 | 0.0469  |
| 47 | C    | 4.6908  | -3.7685 | -0.6336 |
| 48 | C    | 5.3251  | -3.0390 | -1.6263 |
| 49 | C    | 4.9255  | -1.7520 | -1.9498 |
| 50 | C    | 3.8571  | -1.1849 | -1.2610 |
| 51 | H    | 0.8908  | -1.2756 | -2.1184 |
| 52 | H    | 1.5261  | 0.3012  | -1.7342 |
| 53 | H    | -3.7348 | 0.8412  | -0.7323 |
| 54 | H    | -3.8019 | 2.2302  | -2.7591 |

|    |   |         |         |         |
|----|---|---------|---------|---------|
| 55 | H | -3.7685 | -1.7971 | -1.7109 |
| 56 | H | -6.1438 | -2.2838 | -2.2479 |
| 57 | H | -7.1810 | -1.9001 | 1.8814  |
| 58 | H | -4.7971 | -1.4404 | 2.4403  |
| 59 | H | 3.1223  | -3.7520 | 0.8203  |
| 60 | H | 5.0286  | -4.7718 | -0.4054 |
| 61 | H | 5.4486  | -1.2100 | -2.7279 |
| 62 | H | 3.5594  | -0.1767 | -1.5175 |
| 63 | C | -1.7844 | 1.7442  | -3.3490 |
| 64 | H | -1.8040 | 2.3531  | -4.2459 |
| 65 | C | -0.6305 | 1.0586  | -2.9962 |
| 66 | H | 0.2595  | 1.1510  | -3.6104 |
| 67 | H | 3.7235  | 3.4702  | -2.2073 |
| 68 | F | -8.0642 | -2.3551 | -0.5130 |
| 69 | F | 6.3618  | -3.5935 | -2.2927 |
| 70 | H | -1.3985 | 3.6068  | 0.8245  |



Prod4d

|    | Atom | X       | Y       | Z       |
|----|------|---------|---------|---------|
| 1  | C    | 1.5657  | -1.5632 | -0.2924 |
| 2  | N    | 2.6790  | -1.6726 | -1.2292 |
| 3  | C    | 3.3972  | -0.3898 | -1.2292 |
| 4  | C    | 2.4964  | -2.1036 | -2.6277 |
| 5  | C    | 3.8406  | -1.7055 | -3.2403 |
| 6  | C    | 4.1488  | -0.3436 | -2.5800 |
| 7  | H    | 4.0865  | -0.3671 | -0.3858 |
| 8  | C    | 0.5299  | -2.6726 | -0.4475 |
| 9  | C    | 0.6311  | -3.5447 | 0.6470  |
| 10 | N    | 1.6179  | -3.0869 | 1.5233  |
| 11 | C    | 2.2047  | -1.9237 | 1.0971  |
| 12 | C    | -0.3833 | -2.9630 | -1.4529 |
| 13 | C    | -1.1907 | -4.1010 | -1.3436 |
| 14 | C    | -1.0791 | -4.9453 | -0.2425 |
| 15 | C    | -0.1591 | -4.6772 | 0.7732  |
| 16 | O    | 3.0834  | -1.3259 | 1.6839  |
| 17 | H    | 2.3070  | -3.1766 | -2.6768 |
| 18 | H    | 1.6772  | -1.5786 | -3.1358 |
| 19 | H    | 4.6007  | -2.4405 | -2.9637 |
| 20 | H    | 3.8010  | -1.6502 | -4.3300 |
| 21 | H    | 5.2195  | -0.1818 | -2.4476 |
| 22 | H    | 3.7714  | 0.4770  | -3.1958 |
| 23 | H    | -0.4795 | -2.3217 | -2.3182 |
| 24 | H    | -1.7094 | -5.8242 | -0.1699 |
| 25 | H    | -0.0645 | -5.3345 | 1.6297  |
| 26 | C    | -0.4504 | -0.1025 | 1.6926  |
| 27 | C    | 0.7492  | 0.5721  | 1.0824  |
| 28 | C    | 1.0925  | -0.0076 | -0.3122 |
| 29 | C    | -0.1668 | 0.1135  | -1.2002 |
| 30 | C    | -1.5118 | 0.1863  | -0.5119 |
| 31 | C    | -1.5818 | -0.2922 | 0.8815  |
| 32 | C    | -2.6878 | -0.9840 | 1.3952  |
| 33 | C    | -2.6924 | -1.4264 | 2.7119  |
| 34 | C    | -2.5110 | 0.7041  | -1.2662 |
| 35 | H    | -2.2448 | 0.8697  | -2.3071 |
| 36 | C    | -3.8753 | 1.1108  | -0.9189 |
| 37 | C    | 2.3004  | 0.7052  | -1.0377 |
| 38 | C    | 2.8172  | 1.9889  | -0.4248 |
| 39 | H    | 1.9292  | 0.9480  | -2.0336 |
| 40 | O    | -0.0839 | 0.1715  | -2.4138 |
| 41 | C    | -4.2398 | 1.6168  | 0.3420  |
| 42 | C    | -5.5337 | 2.0422  | 0.5921  |
| 43 | C    | -6.5099 | 1.9667  | -0.4143 |
| 44 | C    | -6.1586 | 1.4810  | -1.6811 |
| 45 | C    | -4.8556 | 1.0764  | -1.9270 |
| 46 | C    | 3.6168  | 1.9998  | 0.7291  |
| 47 | C    | 4.0985  | 3.1908  | 1.2545  |
| 48 | C    | 3.7922  | 4.4107  | 0.6340  |
| 49 | C    | 2.9981  | 4.4150  | -0.5198 |
| 50 | C    | 2.5238  | 3.2154  | -1.0353 |
| 51 | H    | 0.5413  | 1.6411  | 0.9562  |
| 52 | H    | 1.6045  | 0.5004  | 1.7483  |
| 53 | H    | -3.5388 | -1.1844 | 0.7567  |
| 54 | H    | -3.5530 | -1.9608 | 3.0975  |

|    |   |         |         |         |
|----|---|---------|---------|---------|
| 55 | H | -3.4983 | 1.6895  | 1.1260  |
| 56 | H | -5.7989 | 2.4394  | 1.5640  |
| 57 | H | -6.9053 | 1.4343  | -2.4640 |
| 58 | H | -4.5866 | 0.7181  | -2.9143 |
| 59 | H | 3.8565  | 1.0672  | 1.2261  |
| 60 | H | 4.7139  | 3.1851  | 2.1458  |
| 61 | H | 2.7623  | 5.3538  | -1.0056 |
| 62 | H | 1.9152  | 3.2289  | -1.9331 |
| 63 | C | -1.5871 | -1.1931 | 3.5310  |
| 64 | H | -1.5914 | -1.5320 | 4.5609  |
| 65 | C | -0.4686 | -0.5440 | 3.0163  |
| 66 | H | 0.4045  | -0.3850 | 3.6403  |
| 67 | H | -1.9050 | -4.3257 | -2.1266 |
| 68 | C | 4.2879  | 5.6392  | 1.1734  |
| 69 | N | 4.6872  | 6.6317  | 1.6099  |
| 70 | C | -7.8486 | 2.3941  | -0.1522 |
| 71 | N | -8.9312 | 2.7371  | 0.0605  |
| 72 | H | 1.9039  | -3.5453 | 2.3752  |

TS4d

|    | Atom | X       | Y       | Z       |
|----|------|---------|---------|---------|
| 1  | C    | -1.0510 | 2.2652  | -0.4343 |
| 2  | N    | -1.8926 | 1.9489  | -1.4448 |
| 3  | C    | -3.0094 | 1.1837  | -1.2927 |
| 4  | C    | -1.6327 | 2.2809  | -2.8749 |
| 5  | C    | -2.7048 | 1.4924  | -3.6381 |
| 6  | C    | -3.7870 | 1.1934  | -2.5830 |
| 7  | H    | -3.4907 | 1.2439  | -0.3286 |
| 8  | C    | 0.2217  | 2.9572  | -0.4906 |
| 9  | C    | 0.5696  | 3.2597  | 0.8526  |
| 10 | N    | -0.4446 | 2.8167  | 1.6900  |
| 11 | C    | -1.4681 | 2.2047  | 0.9863  |
| 12 | C    | 1.1148  | 3.3232  | -1.5054 |
| 13 | C    | 2.3012  | 3.9762  | -1.1746 |
| 14 | C    | 2.6158  | 4.2649  | 0.1542  |
| 15 | C    | 1.7490  | 3.9046  | 1.1874  |
| 16 | O    | -2.4940 | 1.7582  | 1.4971  |
| 17 | H    | -1.7340 | 3.3644  | -2.9875 |
| 18 | H    | -0.6311 | 1.9681  | -3.1464 |
| 19 | H    | -3.0892 | 2.0516  | -4.4914 |
| 20 | H    | -2.2692 | 0.5636  | -4.0079 |
| 21 | H    | -4.5470 | 1.9837  | -2.5499 |
| 22 | H    | -4.3122 | 0.2531  | -2.7593 |
| 23 | H    | 0.9066  | 3.1079  | -2.5427 |
| 24 | H    | 3.5430  | 4.7739  | 0.3902  |
| 25 | H    | 1.9907  | 4.1210  | 2.2213  |
| 26 | C    | 0.3234  | -0.6414 | 1.8668  |
| 27 | C    | -0.9865 | -1.0241 | 1.2230  |
| 28 | C    | -1.1022 | -0.6717 | -0.2357 |
| 29 | C    | 0.0921  | -0.4466 | -1.0409 |
| 30 | C    | 1.4248  | -0.6485 | -0.3646 |
| 31 | C    | 1.4823  | -0.4469 | 1.0964  |
| 32 | C    | 2.6464  | 0.0199  | 1.7337  |
| 33 | C    | 2.6848  | 0.2134  | 3.1061  |
| 34 | C    | 2.4341  | -1.0035 | -1.1950 |
| 35 | H    | 2.1752  | -0.9439 | -2.2492 |
| 36 | C    | 3.7909  | -1.4915 | -0.9281 |
| 37 | C    | -2.3083 | -0.7546 | -0.9576 |
| 38 | C    | -3.5323 | -1.4396 | -0.4600 |
| 39 | H    | -2.1320 | -0.9084 | -2.0184 |
| 40 | O    | 0.0286  | -0.1947 | -2.2529 |
| 41 | C    | 4.1129  | -2.3255 | 0.1583  |
| 42 | C    | 5.3973  | -2.8145 | 0.3287  |
| 43 | C    | 6.4087  | -2.4799 | -0.5860 |
| 44 | C    | 6.1003  | -1.6650 | -1.6842 |
| 45 | C    | 4.8073  | -1.1944 | -1.8538 |
| 46 | C    | -4.2034 | -1.0814 | 0.7214  |
| 47 | C    | -5.3434 | -1.7602 | 1.1283  |
| 48 | C    | -5.8494 | -2.8190 | 0.3608  |
| 49 | C    | -5.1984 | -3.1788 | -0.8270 |
| 50 | C    | -4.0624 | -2.4900 | -1.2276 |
| 51 | H    | -1.1568 | -2.1052 | 1.3463  |
| 52 | H    | -1.7849 | -0.5363 | 1.7862  |
| 53 | H    | 3.5218  | 0.2448  | 1.1392  |
| 54 | H    | 3.5946  | 0.5709  | 3.5750  |

|    |   |         |         |         |
|----|---|---------|---------|---------|
| 55 | H | 3.3424  | -2.6018 | 0.8660  |
| 56 | H | 5.6279  | -3.4627 | 1.1652  |
| 57 | H | 6.8740  | -1.4146 | -2.3996 |
| 58 | H | 4.5734  | -0.5762 | -2.7133 |
| 59 | H | -3.8446 | -0.2488 | 1.3137  |
| 60 | H | -5.8527 | -1.4704 | 2.0392  |
| 61 | H | -5.5870 | -3.9923 | -1.4270 |
| 62 | H | -3.5640 | -2.7782 | -2.1466 |
| 63 | C | 1.5488  | -0.0434 | 3.8767  |
| 64 | H | 1.5728  | 0.0954  | 4.9519  |
| 65 | C | 0.3777  | -0.4534 | 3.2520  |
| 66 | H | -0.5195 | -0.6188 | 3.8401  |
| 67 | H | 2.9881  | 4.2603  | -1.9629 |
| 68 | C | 7.7368  | -2.9759 | -0.4060 |
| 69 | N | 8.8115  | -3.3749 | -0.2590 |
| 70 | C | -7.0240 | -3.5184 | 0.7801  |
| 71 | N | -7.9736 | -4.0832 | 1.1183  |
| 72 | H | -0.4248 | 2.8248  | 2.6972  |

Prod5d

|    | Atom | X       | Y       | Z       |
|----|------|---------|---------|---------|
| 1  | C    | 2.4388  | -0.7683 | -0.1577 |
| 2  | N    | 3.5431  | -0.0914 | 0.4991  |
| 3  | C    | 3.3870  | 1.3836  | 0.4192  |
| 4  | C    | 4.9304  | -0.4734 | 0.1712  |
| 5  | C    | 5.7028  | 0.8593  | 0.1800  |
| 6  | C    | 4.6538  | 1.8834  | -0.2873 |
| 7  | H    | 3.3722  | 1.7855  | 1.4401  |
| 8  | C    | 2.2258  | -2.2018 | 0.2983  |
| 9  | C    | 2.0527  | -3.0275 | -0.8212 |
| 10 | N    | 2.1962  | -2.2667 | -1.9921 |
| 11 | C    | 2.6334  | -0.9882 | -1.7170 |
| 12 | C    | 2.2840  | -2.7718 | 1.5583  |
| 13 | C    | 2.0943  | -4.1510 | 1.6983  |
| 14 | C    | 1.8654  | -4.9467 | 0.5785  |
| 15 | C    | 1.8527  | -4.3949 | -0.7060 |
| 16 | O    | 3.1130  | -0.2220 | -2.5195 |
| 17 | H    | 5.3239  | -1.1876 | 0.8998  |
| 18 | H    | 4.9961  | -0.9354 | -0.8209 |
| 19 | H    | 6.0375  | 1.0959  | 1.1951  |
| 20 | H    | 6.5861  | 0.8259  | -0.4605 |
| 21 | H    | 4.9109  | 2.9115  | -0.0237 |
| 22 | H    | 4.5231  | 1.8194  | -1.3703 |
| 23 | H    | 2.4897  | -2.1557 | 2.4240  |
| 24 | H    | 1.7151  | -6.0137 | 0.6978  |
| 25 | H    | 1.7161  | -5.0197 | -1.5811 |
| 26 | C    | -0.2545 | -0.7746 | 1.8961  |
| 27 | C    | 0.7506  | 0.2928  | 1.5461  |
| 28 | C    | 1.2448  | 0.2764  | 0.0798  |
| 29 | C    | 0.0604  | 0.0874  | -0.8919 |
| 30 | C    | -1.2408 | -0.4558 | -0.3517 |
| 31 | C    | -1.2148 | -1.1558 | 0.9452  |
| 32 | C    | -2.0887 | -2.2140 | 1.2444  |
| 33 | C    | -2.0740 | -2.8168 | 2.4936  |
| 34 | C    | -2.3196 | -0.2052 | -1.1344 |
| 35 | H    | -2.0726 | 0.2180  | -2.1049 |
| 36 | C    | -3.7567 | -0.3638 | -0.8944 |
| 37 | C    | 2.0335  | 1.6007  | -0.2749 |
| 38 | C    | 1.3261  | 2.9149  | -0.0114 |
| 39 | H    | 2.2047  | 1.5427  | -1.3492 |
| 40 | O    | 0.1620  | 0.4336  | -2.0526 |
| 41 | C    | -4.3575 | -0.1757 | 0.3635  |
| 42 | C    | -5.7303 | -0.2697 | 0.5186  |
| 43 | C    | -6.5477 | -0.5656 | -0.5841 |
| 44 | C    | -5.9659 | -0.7386 | -1.8474 |
| 45 | C    | -4.5924 | -0.6210 | -1.9958 |
| 46 | C    | 0.6050  | 3.5119  | -1.0572 |
| 47 | C    | -0.0603 | 4.7173  | -0.8832 |
| 48 | C    | -0.0146 | 5.3698  | 0.3564  |
| 49 | C    | 0.7084  | 4.7934  | 1.4084  |
| 50 | C    | 1.3661  | 3.5840  | 1.2206  |
| 51 | H    | 0.2866  | 1.2696  | 1.7222  |
| 52 | H    | 1.6078  | 0.2326  | 2.2188  |
| 53 | H    | -2.7810 | -2.5631 | 0.4891  |
| 54 | H    | -2.7561 | -3.6313 | 2.7084  |

|    |   |         |         |         |
|----|---|---------|---------|---------|
| 55 | H | -3.7425 | 0.0606  | 1.2215  |
| 56 | H | -6.1817 | -0.1116 | 1.4902  |
| 57 | H | -6.5944 | -0.9525 | -2.7028 |
| 58 | H | -4.1508 | -0.7377 | -2.9791 |
| 59 | H | 0.5669  | 3.0139  | -2.0184 |
| 60 | H | -0.6109 | 5.1621  | -1.7029 |
| 61 | H | 0.7539  | 5.2975  | 2.3659  |
| 62 | H | 1.9241  | 3.1679  | 2.0498  |
| 63 | C | -1.1777 | -2.3740 | 3.4677  |
| 64 | H | -1.1719 | -2.8290 | 4.4516  |
| 65 | C | -0.2677 | -1.3703 | 3.1594  |
| 66 | H | 0.4564  | -1.0518 | 3.9024  |
| 67 | H | 2.1301  | -4.6023 | 2.6825  |
| 68 | C | -0.6930 | 6.6148  | 0.5454  |
| 69 | N | -1.2417 | 7.6197  | 0.7004  |
| 70 | C | -7.9634 | -0.6774 | -0.4212 |
| 71 | N | -9.1074 | -0.7714 | -0.2886 |
| 72 | H | 2.3056  | -2.6605 | -2.9156 |

TS5d

|    | Atom | X       | Y       | Z       |
|----|------|---------|---------|---------|
| 1  | C    | 1.1390  | 1.9518  | 1.2476  |
| 2  | N    | 1.8609  | 1.2365  | 2.1348  |
| 3  | C    | 2.9033  | 0.4179  | 1.7981  |
| 4  | C    | 1.4998  | 1.1036  | 3.5859  |
| 5  | C    | 2.3547  | -0.0728 | 4.0614  |
| 6  | C    | 3.5288  | -0.1148 | 3.0651  |
| 7  | H    | 3.5373  | 0.7347  | 0.9847  |
| 8  | C    | 1.5643  | 2.5615  | 0.0015  |
| 9  | C    | 0.4859  | 3.3781  | -0.4365 |
| 10 | N    | -0.5479 | 3.2893  | 0.4817  |
| 11 | C    | -0.2190 | 2.4872  | 1.5676  |
| 12 | C    | 2.7419  | 2.5649  | -0.7563 |
| 13 | C    | 2.8237  | 3.3469  | -1.9109 |
| 14 | C    | 1.7416  | 4.1218  | -2.3259 |
| 15 | C    | 0.5578  | 4.1486  | -1.5846 |
| 16 | O    | -0.9325 | 2.2980  | 2.5357  |
| 17 | H    | 1.7780  | 2.0470  | 4.0664  |
| 18 | H    | 0.4326  | 0.9533  | 3.6888  |
| 19 | H    | 2.6828  | 0.0558  | 5.0933  |
| 20 | H    | 1.7666  | -0.9884 | 3.9966  |
| 21 | H    | 4.3485  | 0.5413  | 3.3827  |
| 22 | H    | 3.9505  | -1.1124 | 2.9301  |
| 23 | H    | 3.6095  | 1.9939  | -0.4560 |
| 24 | H    | 1.8188  | 4.7170  | -3.2282 |
| 25 | H    | -0.2806 | 4.7609  | -1.8950 |
| 26 | C    | -0.5229 | 0.1319  | -1.8267 |
| 27 | C    | 0.7855  | -0.4586 | -1.3567 |
| 28 | C    | 0.8883  | -0.7001 | 0.1236  |
| 29 | C    | -0.3094 | -0.7415 | 0.9567  |
| 30 | C    | -1.6454 | -0.6113 | 0.2698  |
| 31 | C    | -1.6821 | 0.0777  | -1.0341 |
| 32 | C    | -2.8323 | 0.7573  | -1.4786 |
| 33 | C    | -2.8606 | 1.3967  | -2.7081 |
| 34 | C    | -2.6809 | -1.1585 | 0.9502  |
| 35 | H    | -2.4224 | -1.4685 | 1.9596  |
| 36 | C    | -4.0660 | -1.4417 | 0.5609  |
| 37 | C    | 2.0663  | -1.1419 | 0.7743  |
| 38 | C    | 3.2332  | -1.7499 | 0.0786  |
| 39 | H    | 1.8206  | -1.6654 | 1.6931  |
| 40 | O    | -0.2444 | -0.9801 | 2.1689  |
| 41 | C    | -4.4295 | -1.8859 | -0.7235 |
| 42 | C    | -5.7424 | -2.2087 | -1.0239 |
| 43 | C    | -6.7408 | -2.0925 | -0.0434 |
| 44 | C    | -6.3921 | -1.6681 | 1.2465  |
| 45 | C    | -5.0718 | -1.3636 | 1.5409  |
| 46 | C    | 3.7035  | -2.9904 | 0.5443  |
| 47 | C    | 4.7889  | -3.6254 | -0.0412 |
| 48 | C    | 5.4524  | -3.0242 | -1.1194 |
| 49 | C    | 5.0054  | -1.7826 | -1.5913 |
| 50 | C    | 3.9159  | -1.1601 | -0.9983 |
| 51 | H    | 0.9788  | -1.4006 | -1.8936 |
| 52 | H    | 1.5761  | 0.2235  | -1.6837 |
| 53 | H    | -3.7076 | 0.7864  | -0.8438 |
| 54 | H    | -3.7612 | 1.9074  | -3.0300 |

|    |   |         |         |         |
|----|---|---------|---------|---------|
| 55 | H | -3.6692 | -1.9901 | -1.4867 |
| 56 | H | -6.0058 | -2.5581 | -2.0146 |
| 57 | H | -7.1567 | -1.5884 | 2.0093  |
| 58 | H | -4.8071 | -1.0487 | 2.5440  |
| 59 | H | 3.1948  | -3.4695 | 1.3731  |
| 60 | H | 5.1278  | -4.5849 | 0.3297  |
| 61 | H | 5.5177  | -1.3111 | -2.4210 |
| 62 | H | 3.6012  | -0.1982 | -1.3801 |
| 63 | C | -1.7267 | 1.3860  | -3.5232 |
| 64 | H | -1.7407 | 1.8769  | -4.4896 |
| 65 | C | -0.5681 | 0.7710  | -3.0702 |
| 66 | H | 0.3301  | 0.8011  | -3.6785 |
| 67 | H | 3.7418  | 3.3506  | -2.4863 |
| 68 | C | -8.0974 | -2.4161 | -0.3549 |
| 69 | N | -9.1948 | -2.6755 | -0.6084 |
| 70 | C | 6.5757  | -3.6659 | -1.7281 |
| 71 | N | 7.4847  | -4.1824 | -2.2199 |
| 72 | H | -1.4414 | 3.7496  | 0.4151  |



Prod4e

|    | Atom | X       | Y       | Z       |
|----|------|---------|---------|---------|
| 1  | C    | 1.6850  | -1.9268 | -0.2951 |
| 2  | N    | 2.7240  | -2.0582 | -1.3157 |
| 3  | C    | 3.5311  | -0.8267 | -1.2907 |
| 4  | C    | 2.4001  | -2.3609 | -2.7222 |
| 5  | C    | 3.7235  | -2.0260 | -3.4131 |
| 6  | C    | 4.2018  | -0.7514 | -2.6820 |
| 7  | H    | 4.2686  | -0.9026 | -0.4928 |
| 8  | C    | 0.5575  | -2.9409 | -0.4420 |
| 9  | C    | 0.6609  | -3.8835 | 0.5929  |
| 10 | N    | 1.7369  | -3.5709 | 1.4297  |
| 11 | C    | 2.3794  | -2.4273 | 1.0166  |
| 12 | C    | -0.4410 | -3.0944 | -1.3933 |
| 13 | C    | -1.3307 | -4.1715 | -1.2931 |
| 14 | C    | -1.2154 | -5.0889 | -0.2540 |
| 15 | C    | -0.2107 | -4.9575 | 0.7083  |
| 16 | O    | 3.3460  | -1.9374 | 1.5691  |
| 17 | H    | 2.1146  | -3.4078 | -2.8335 |
| 18 | H    | 1.5935  | -1.7328 | -3.1223 |
| 19 | H    | 4.4345  | -2.8412 | -3.2555 |
| 20 | H    | 3.6055  | -1.8808 | -4.4891 |
| 21 | H    | 5.2895  | -0.7031 | -2.6094 |
| 22 | H    | 3.8739  | 0.1467  | -3.2117 |
| 23 | H    | -0.5435 | -2.3915 | -2.2085 |
| 24 | H    | -1.9099 | -5.9187 | -0.1866 |
| 25 | H    | -0.1177 | -5.6734 | 1.5156  |
| 26 | C    | -0.0402 | -0.4464 | 1.9330  |
| 27 | C    | 1.1531  | 0.1748  | 1.2585  |
| 28 | C    | 1.3330  | -0.3437 | -0.1895 |
| 29 | C    | 0.0162  | -0.0744 | -0.9566 |
| 30 | C    | -1.2546 | 0.0568  | -0.1531 |
| 31 | C    | -1.2459 | -0.4992 | 1.2132  |
| 32 | C    | -2.3554 | -1.1420 | 1.7808  |
| 33 | C    | -2.2860 | -1.6683 | 3.0648  |
| 34 | C    | -2.2741 | 0.6841  | -0.7923 |
| 35 | H    | -2.0786 | 0.8819  | -1.8432 |
| 36 | C    | 2.5289  | 0.3249  | -0.9738 |
| 37 | H    | 2.1016  | 0.6334  | -1.9282 |
| 38 | O    | 0.0066  | 0.0503  | -2.1695 |
| 39 | H    | 1.0182  | 1.2613  | 1.2045  |
| 40 | H    | 2.0531  | 0.0031  | 1.8419  |
| 41 | H    | -3.2694 | -1.2366 | 1.2082  |
| 42 | H    | -3.1516 | -2.1622 | 3.4916  |
| 43 | C    | -1.1023 | -1.5706 | 3.7967  |
| 44 | H    | -1.0481 | -1.9737 | 4.8020  |
| 45 | C    | 0.0169  | -0.9715 | 3.2246  |
| 46 | H    | 0.9486  | -0.9164 | 3.7778  |
| 47 | C    | 2.1525  | -4.3424 | 2.5827  |
| 48 | H    | 1.3574  | -4.3752 | 3.3334  |
| 49 | H    | 2.4138  | -5.3643 | 2.2926  |
| 50 | H    | 3.0287  | -3.8519 | 3.0035  |
| 51 | C    | 3.1722  | 1.5485  | -0.3552 |
| 52 | C    | 2.9260  | 2.7979  | -0.8858 |
| 53 | C    | 4.0642  | 1.4491  | 0.7517  |
| 54 | C    | 3.5242  | 3.9728  | -0.3609 |

|    |   |         |         |         |
|----|---|---------|---------|---------|
| 55 | H | 2.2561  | 2.8963  | -1.7350 |
| 56 | C | 4.6610  | 2.5644  | 1.2833  |
| 57 | H | 4.2669  | 0.4758  | 1.1833  |
| 58 | C | 3.2721  | 5.2600  | -0.9036 |
| 59 | C | 4.4145  | 3.8566  | 0.7511  |
| 60 | H | 5.3372  | 2.4674  | 2.1269  |
| 61 | C | 3.8693  | 6.3775  | -0.3723 |
| 62 | H | 2.5965  | 5.3479  | -1.7483 |
| 63 | C | 5.0156  | 5.0294  | 1.2758  |
| 64 | C | 4.7501  | 6.2616  | 0.7285  |
| 65 | H | 3.6676  | 7.3551  | -0.7959 |
| 66 | H | 5.6915  | 4.9375  | 2.1199  |
| 67 | H | 5.2154  | 7.1511  | 1.1383  |
| 68 | C | -3.5682 | 1.1759  | -0.3202 |
| 69 | C | -4.5849 | 1.3362  | -1.2494 |
| 70 | C | -3.8161 | 1.5784  | 1.0276  |
| 71 | C | -5.8628 | 1.8269  | -0.8904 |
| 72 | H | -4.4045 | 1.0695  | -2.2862 |
| 73 | C | -5.0341 | 2.0790  | 1.4002  |
| 74 | H | -3.0209 | 1.5046  | 1.7566  |
| 75 | C | -6.9142 | 1.9647  | -1.8345 |
| 76 | C | -6.0994 | 2.2069  | 0.4676  |
| 77 | H | -5.1984 | 2.3942  | 2.4254  |
| 78 | C | -8.1412 | 2.4512  | -1.4531 |
| 79 | H | -6.7331 | 1.6774  | -2.8650 |
| 80 | C | -7.3745 | 2.7075  | 0.8278  |
| 81 | C | -8.3738 | 2.8259  | -0.1097 |
| 82 | H | -8.9373 | 2.5507  | -2.1822 |
| 83 | H | -7.5515 | 2.9976  | 1.8582  |
| 84 | H | -9.3461 | 3.2095  | 0.1782  |
| 85 | H | -2.1125 | -4.2881 | -2.0341 |

TS4e

|    | Atom | X       | Y       | Z       |
|----|------|---------|---------|---------|
| 1  | C    | 1.5964  | -2.1258 | -0.8048 |
| 2  | N    | 2.2677  | -1.4075 | -1.7351 |
| 3  | C    | 3.1943  | -0.4530 | -1.4364 |
| 4  | C    | 1.9841  | -1.4740 | -3.1963 |
| 5  | C    | 2.7995  | -0.3149 | -3.7843 |
| 6  | C    | 3.8617  | -0.0075 | -2.7117 |
| 7  | H    | 3.7494  | -0.6104 | -0.5241 |
| 8  | C    | 0.5047  | -3.0589 | -0.9898 |
| 9  | C    | 0.3635  | -3.7510 | 0.2434  |
| 10 | N    | 1.3240  | -3.3022 | 1.1409  |
| 11 | C    | 2.1154  | -2.3146 | 0.5662  |
| 12 | C    | -0.3840 | -3.3606 | -2.0273 |
| 13 | C    | -1.3644 | -4.3341 | -1.8330 |
| 14 | C    | -1.4778 | -5.0044 | -0.6154 |
| 15 | C    | -0.6130 | -4.7146 | 0.4431  |
| 16 | O    | 3.0661  | -1.7750 | 1.1352  |
| 17 | H    | 2.3115  | -2.4550 | -3.5542 |
| 18 | H    | 0.9221  | -1.3474 | -3.3697 |
| 19 | H    | 3.2350  | -0.5739 | -4.7500 |
| 20 | H    | 2.1446  | 0.5456  | -3.9253 |
| 21 | H    | 4.7776  | -0.5893 | -2.8734 |
| 22 | H    | 4.1516  | 1.0442  | -2.6800 |
| 23 | H    | -0.3321 | -2.8505 | -2.9775 |
| 24 | H    | -2.2473 | -5.7562 | -0.4833 |
| 25 | H    | -0.7072 | -5.2256 | 1.3933  |
| 26 | C    | -0.2369 | -0.0861 | 2.1347  |
| 27 | C    | 0.9515  | 0.6365  | 1.5497  |
| 28 | C    | 1.0241  | 0.6396  | 0.0473  |
| 29 | C    | -0.1509 | 0.3323  | -0.7589 |
| 30 | C    | -1.4523 | 0.1202  | -0.0312 |
| 31 | C    | -1.3845 | -0.3488 | 1.3662  |
| 32 | C    | -2.4098 | -1.1286 | 1.9331  |
| 33 | C    | -2.3422 | -1.5602 | 3.2492  |
| 34 | C    | -2.5615 | 0.4004  | -0.7592 |
| 35 | H    | -2.3536 | 0.5834  | -1.8103 |
| 36 | C    | 2.1278  | 1.1482  | -0.6668 |
| 37 | H    | 1.8404  | 1.4814  | -1.6599 |
| 38 | O    | -0.1118 | 0.3460  | -1.9992 |
| 39 | H    | 0.9670  | 1.6761  | 1.9127  |
| 40 | H    | 1.8535  | 0.1742  | 1.9602  |
| 41 | H    | -3.2617 | -1.4027 | 1.3255  |
| 42 | H    | -3.1490 | -2.1544 | 3.6635  |
| 43 | C    | -1.2318 | -1.2357 | 4.0308  |
| 44 | H    | -1.1744 | -1.5586 | 5.0645  |
| 45 | C    | -0.1851 | -0.5190 | 3.4640  |
| 46 | H    | 0.6990  | -0.2968 | 4.0535  |
| 47 | C    | 1.5050  | -3.7756 | 2.4970  |
| 48 | H    | 0.6275  | -3.5508 | 3.1091  |
| 49 | H    | 1.6902  | -4.8537 | 2.5082  |
| 50 | H    | 2.3712  | -3.2590 | 2.9073  |
| 51 | C    | 3.2100  | 1.9742  | -0.0622 |
| 52 | C    | 3.4562  | 3.2278  | -0.5923 |
| 53 | C    | 4.0234  | 1.5276  | 1.0204  |
| 54 | C    | 4.4589  | 4.0835  | -0.0712 |

|    |   |          |         |         |
|----|---|----------|---------|---------|
| 55 | H | 2.8550   | 3.5841  | -1.4235 |
| 56 | C | 5.0075   | 2.3290  | 1.5413  |
| 57 | H | 3.8788   | 0.5305  | 1.4176  |
| 58 | C | 4.7019   | 5.3781  | -0.6014 |
| 59 | C | 5.2547   | 3.6276  | 1.0253  |
| 60 | H | 5.6200   | 1.9678  | 2.3613  |
| 61 | C | 5.6831   | 6.1816  | -0.0734 |
| 62 | H | 4.0963   | 5.7252  | -1.4322 |
| 63 | C | 6.2609   | 4.4806  | 1.5460  |
| 64 | C | 6.4710   | 5.7288  | 1.0109  |
| 65 | H | 5.8575   | 7.1689  | -0.4861 |
| 66 | H | 6.8640   | 4.1309  | 2.3776  |
| 67 | H | 7.2421   | 6.3730  | 1.4183  |
| 68 | C | -3.9708  | 0.5513  | -0.3843 |
| 69 | C | -4.9465  | 0.2653  | -1.3255 |
| 70 | C | -4.3871  | 1.0762  | 0.8770  |
| 71 | C | -6.3268  | 0.4257  | -1.0533 |
| 72 | H | -4.6501  | -0.1034 | -2.3027 |
| 73 | C | -5.7127  | 1.2631  | 1.1632  |
| 74 | H | -3.6361  | 1.3475  | 1.6072  |
| 75 | C | -7.3299  | 0.1072  | -2.0065 |
| 76 | C | -6.7258  | 0.9346  | 0.2221  |
| 77 | H | -6.0065  | 1.6773  | 2.1224  |
| 78 | C | -8.6609  | 0.2802  | -1.7124 |
| 79 | H | -7.0271  | -0.2779 | -2.9748 |
| 80 | C | -8.1059  | 1.1042  | 0.4930  |
| 81 | C | -9.0535  | 0.7835  | -0.4506 |
| 82 | H | -9.4171  | 0.0319  | -2.4487 |
| 83 | H | -8.4052  | 1.4930  | 1.4610  |
| 84 | H | -10.1069 | 0.9167  | -0.2310 |
| 85 | H | -2.0495  | -4.5654 | -2.6400 |

Prod5e

|    | Atom | X       | Y       | Z       |
|----|------|---------|---------|---------|
| 1  | C    | 2.3962  | -0.5875 | -0.1166 |
| 2  | N    | 3.4559  | 0.1442  | 0.5574  |
| 3  | C    | 3.1990  | 1.6079  | 0.5091  |
| 4  | C    | 4.8627  | -0.1347 | 0.2128  |
| 5  | C    | 5.5433  | 1.2472  | 0.2422  |
| 6  | C    | 4.4229  | 2.2063  | -0.1961 |
| 7  | H    | 3.1680  | 1.9868  | 1.5383  |
| 8  | C    | 2.2701  | -2.0412 | 0.2988  |
| 9  | C    | 2.1353  | -2.8396 | -0.8471 |
| 10 | N    | 2.2539  | -2.0501 | -2.0014 |
| 11 | C    | 2.6005  | -0.7532 | -1.6754 |
| 12 | C    | 2.3585  | -2.6429 | 1.5403  |
| 13 | C    | 2.2355  | -4.0344 | 1.6411  |
| 14 | C    | 2.0400  | -4.8061 | 0.5000  |
| 15 | C    | 1.9994  | -4.2188 | -0.7695 |
| 16 | O    | 3.0266  | 0.0693  | -2.4565 |
| 17 | H    | 5.3111  | -0.8344 | 0.9242  |
| 18 | H    | 4.9523  | -0.5719 | -0.7888 |
| 19 | H    | 5.8701  | 1.4860  | 1.2596  |
| 20 | H    | 6.4217  | 1.2859  | -0.4053 |
| 21 | H    | 4.6111  | 3.2442  | 0.0874  |
| 22 | H    | 4.2870  | 2.1554  | -1.2790 |
| 23 | H    | 2.5332  | -2.0418 | 2.4232  |
| 24 | H    | 1.9380  | -5.8819 | 0.5885  |
| 25 | H    | 1.8887  | -4.8267 | -1.6590 |
| 26 | C    | -0.2937 | -0.8098 | 1.9545  |
| 27 | C    | 0.6548  | 0.3137  | 1.6255  |
| 28 | C    | 1.1356  | 0.3661  | 0.1549  |
| 29 | C    | -0.0408 | 0.1216  | -0.8165 |
| 30 | C    | -1.3193 | -0.4602 | -0.2720 |
| 31 | C    | -1.2543 | -1.1936 | 1.0051  |
| 32 | C    | -2.0829 | -2.2937 | 1.2806  |
| 33 | C    | -2.0238 | -2.9398 | 2.5073  |
| 34 | C    | -2.4163 | -0.2234 | -1.0367 |
| 35 | H    | -2.1879 | 0.2213  | -2.0019 |
| 36 | C    | 1.8264  | 1.7515  | -0.1677 |
| 37 | H    | 1.9907  | 1.7345  | -1.2440 |
| 38 | O    | 0.0534  | 0.4558  | -1.9827 |
| 39 | H    | 0.1413  | 1.2597  | 1.8291  |
| 40 | H    | 1.5197  | 0.2820  | 2.2904  |
| 41 | H    | -2.7760 | -2.6398 | 0.5244  |
| 42 | H    | -2.6727 | -3.7856 | 2.7037  |
| 43 | C    | -1.1266 | -2.5001 | 3.4814  |
| 44 | H    | -1.0850 | -2.9903 | 4.4476  |
| 45 | C    | -0.2611 | -1.4509 | 3.1947  |
| 46 | H    | 0.4632  | -1.1307 | 3.9369  |
| 47 | C    | 2.3100  | -2.5619 | -3.3559 |
| 48 | H    | 3.1148  | -3.2962 | -3.4680 |
| 49 | H    | 1.3603  | -3.0291 | -3.6287 |
| 50 | H    | 2.5007  | -1.7167 | -4.0151 |
| 51 | H    | 2.2936  | -4.5110 | 2.6124  |
| 52 | C    | 1.0351  | 3.0092  | 0.1388  |
| 53 | C    | 0.2965  | 3.5957  | -0.8705 |
| 54 | C    | 1.0279  | 3.6320  | 1.4192  |

|    |   |         |         |         |
|----|---|---------|---------|---------|
| 55 | C | -0.4654 | 4.7727  | -0.6624 |
| 56 | H | 0.2914  | 3.1409  | -1.8553 |
| 57 | C | 0.3052  | 4.7759  | 1.6553  |
| 58 | H | 1.6097  | 3.2067  | 2.2277  |
| 59 | C | -1.2275 | 5.3726  | -1.6999 |
| 60 | C | -0.4646 | 5.3815  | 0.6308  |
| 61 | H | 0.3205  | 5.2340  | 2.6391  |
| 62 | C | -1.9532 | 6.5155  | -1.4686 |
| 63 | H | -1.2272 | 4.9101  | -2.6813 |
| 64 | C | -1.2237 | 6.5626  | 0.8370  |
| 65 | C | -1.9516 | 7.1169  | -0.1875 |
| 66 | H | -2.5320 | 6.9631  | -2.2688 |
| 67 | H | -1.2202 | 7.0222  | 1.8201  |
| 68 | H | -2.5288 | 8.0192  | -0.0190 |
| 69 | C | -3.8458 | -0.4130 | -0.7884 |
| 70 | C | -4.6851 | -0.5771 | -1.8795 |
| 71 | C | -4.4337 | -0.3455 | 0.5115  |
| 72 | C | -6.0840 | -0.7377 | -1.7358 |
| 73 | H | -4.2612 | -0.5935 | -2.8789 |
| 74 | C | -5.7858 | -0.4718 | 0.6802  |
| 75 | H | -3.7997 | -0.1700 | 1.3698  |
| 76 | C | -6.9421 | -0.9362 | -2.8493 |
| 77 | C | -6.6535 | -0.6868 | -0.4253 |
| 78 | H | -6.2158 | -0.4010 | 1.6740  |
| 79 | C | -8.2973 | -1.0811 | -2.6748 |
| 80 | H | -6.5091 | -0.9731 | -3.8435 |
| 81 | C | -8.0543 | -0.8368 | -0.2796 |
| 82 | C | -8.8588 | -1.0312 | -1.3781 |
| 83 | H | -8.9427 | -1.2336 | -3.5323 |
| 84 | H | -8.4849 | -0.7953 | 0.7155  |
| 85 | H | -9.9298 | -1.1456 | -1.2538 |

TS5e

|    | Atom | X       | Y       | Z       |
|----|------|---------|---------|---------|
| 1  | C    | 2.4649  | -1.0289 | -0.9045 |
| 2  | N    | 2.7534  | 0.0827  | -1.6134 |
| 3  | C    | 3.0338  | 1.3009  | -1.0561 |
| 4  | C    | 2.6249  | 0.1735  | -3.1052 |
| 5  | C    | 2.6859  | 1.6776  | -3.3794 |
| 6  | C    | 3.4260  | 2.2556  | -2.1587 |
| 7  | H    | 3.5919  | 1.3022  | -0.1328 |
| 8  | C    | 2.9514  | -1.4359 | 0.3982  |
| 9  | C    | 2.5145  | -2.7773 | 0.5862  |
| 10 | N    | 1.8035  | -3.1966 | -0.5278 |
| 11 | C    | 1.7769  | -2.2043 | -1.5073 |
| 12 | C    | 3.7489  | -0.8567 | 1.3908  |
| 13 | C    | 4.0826  | -1.5912 | 2.5328  |
| 14 | C    | 3.6222  | -2.8950 | 2.7011  |
| 15 | C    | 2.8327  | -3.5052 | 1.7215  |
| 16 | O    | 1.2732  | -2.3380 | -2.6106 |
| 17 | H    | 3.4781  | -0.3661 | -3.5292 |
| 18 | H    | 1.7079  | -0.3038 | -3.4267 |
| 19 | H    | 3.1895  | 1.8979  | -4.3215 |
| 20 | H    | 1.6700  | 2.0700  | -3.4293 |
| 21 | H    | 4.5135  | 2.2370  | -2.3031 |
| 22 | H    | 3.1495  | 3.2857  | -1.9273 |
| 23 | H    | 4.1390  | 0.1463  | 1.2891  |
| 24 | H    | 3.8814  | -3.4479 | 3.5966  |
| 25 | H    | 2.4837  | -4.5227 | 1.8455  |
| 26 | C    | -0.4312 | -0.8601 | 1.8082  |
| 27 | C    | 0.3435  | 0.4202  | 1.6063  |
| 28 | C    | 0.5204  | 0.8474  | 0.1758  |
| 29 | C    | -0.3233 | 0.2918  | -0.8777 |
| 30 | C    | -1.4297 | -0.6449 | -0.4661 |
| 31 | C    | -1.2705 | -1.3758 | 0.8054  |
| 32 | C    | -1.8758 | -2.6297 | 1.0172  |
| 33 | C    | -1.7224 | -3.3112 | 2.2153  |
| 34 | C    | -2.4683 | -0.7076 | -1.3353 |
| 35 | H    | -2.2744 | -0.1977 | -2.2755 |
| 36 | C    | 1.3015  | 1.9597  | -0.2237 |
| 37 | H    | 0.9444  | 2.3528  | -1.1707 |
| 38 | O    | -0.2103 | 0.6593  | -2.0548 |
| 39 | H    | -0.1378 | 1.2345  | 2.1708  |
| 40 | H    | 1.3188  | 0.2822  | 2.0832  |
| 41 | H    | -2.4680 | -3.0700 | 0.2263  |
| 42 | H    | -2.2073 | -4.2711 | 2.3552  |
| 43 | C    | -0.9387 | -2.7623 | 3.2320  |
| 44 | H    | -0.8151 | -3.2852 | 4.1737  |
| 45 | C    | -0.2897 | -1.5547 | 3.0139  |
| 46 | H    | 0.3577  | -1.1451 | 3.7827  |
| 47 | C    | 1.1964  | -4.4981 | -0.7104 |
| 48 | H    | 0.7350  | -4.5023 | -1.6968 |
| 49 | H    | 1.9481  | -5.2921 | -0.6608 |
| 50 | H    | 0.4304  | -4.6764 | 0.0487  |
| 51 | H    | 4.7072  | -1.1365 | 3.2929  |
| 52 | C    | 1.7644  | 3.0418  | 0.6915  |
| 53 | C    | 1.4913  | 4.3536  | 0.3446  |
| 54 | C    | 2.4973  | 2.8117  | 1.8920  |

|    |   |         |         |         |
|----|---|---------|---------|---------|
| 55 | C | 1.8931  | 5.4502  | 1.1472  |
| 56 | H | 0.9356  | 4.5585  | -0.5653 |
| 57 | C | 2.9088  | 3.8502  | 2.6889  |
| 58 | H | 2.7426  | 1.7993  | 2.1845  |
| 59 | C | 1.5988  | 6.7943  | 0.7960  |
| 60 | C | 2.6209  | 5.1972  | 2.3510  |
| 61 | H | 3.4663  | 3.6470  | 3.5976  |
| 62 | C | 2.0054  | 7.8346  | 1.5955  |
| 63 | H | 1.0438  | 6.9873  | -0.1162 |
| 64 | C | 3.0276  | 6.2932  | 3.1539  |
| 65 | C | 2.7274  | 7.5825  | 2.7859  |
| 66 | H | 1.7731  | 8.8564  | 1.3171  |
| 67 | H | 3.5804  | 6.0970  | 4.0668  |
| 68 | H | 3.0418  | 8.4133  | 3.4074  |
| 69 | C | -3.8081 | -1.2927 | -1.2239 |
| 70 | C | -4.4313 | -1.7604 | -2.3694 |
| 71 | C | -4.5448 | -1.3139 | -0.0006 |
| 72 | C | -5.7400 | -2.3009 | -2.3473 |
| 73 | H | -3.9003 | -1.7236 | -3.3156 |
| 74 | C | -5.8197 | -1.8100 | 0.0495  |
| 75 | H | -4.0884 | -0.9110 | 0.8942  |
| 76 | C | -6.3708 | -2.8068 | -3.5146 |
| 77 | C | -6.4558 | -2.3311 | -1.1097 |
| 78 | H | -6.3675 | -1.8030 | 0.9864  |
| 79 | C | -7.6445 | -3.3195 | -3.4603 |
| 80 | H | -5.8277 | -2.7832 | -4.4537 |
| 81 | C | -7.7686 | -2.8633 | -1.0881 |
| 82 | C | -8.3509 | -3.3484 | -2.2357 |
| 83 | H | -8.1143 | -3.7041 | -4.3587 |
| 84 | H | -8.3101 | -2.8824 | -0.1478 |
| 85 | H | -9.3558 | -3.7544 | -2.2061 |



Prod4f

|    | Atom | X       | Y       | Z       |
|----|------|---------|---------|---------|
| 1  | C    | 1.5500  | -1.3849 | -0.1626 |
| 2  | N    | 2.6846  | -1.5307 | -1.0745 |
| 3  | C    | 3.4214  | -0.2554 | -1.0690 |
| 4  | C    | 2.5031  | -1.9400 | -2.4795 |
| 5  | C    | 3.8675  | -1.5839 | -3.0741 |
| 6  | C    | 4.2253  | -0.2447 | -2.3898 |
| 7  | H    | 4.0750  | -0.2276 | -0.1983 |
| 8  | C    | 0.4912  | -2.4674 | -0.3321 |
| 9  | C    | 0.5461  | -3.3297 | 0.7742  |
| 10 | N    | 1.5251  | -2.9017 | 1.6760  |
| 11 | C    | 2.1458  | -1.7546 | 1.2381  |
| 12 | C    | -0.4087 | -2.7404 | -1.3526 |
| 13 | C    | -1.2508 | -3.8551 | -1.2509 |
| 14 | C    | -1.1858 | -4.6911 | -0.1413 |
| 15 | C    | -0.2795 | -4.4392 | 0.8922  |
| 16 | O    | 3.0329  | -1.1760 | 1.8358  |
| 17 | H    | 2.2760  | -3.0051 | -2.5430 |
| 18 | H    | 1.7082  | -1.3811 | -2.9907 |
| 19 | H    | 4.5957  | -2.3525 | -2.8026 |
| 20 | H    | 3.8397  | -1.5117 | -4.1635 |
| 21 | H    | 5.2979  | -0.1485 | -2.2142 |
| 22 | H    | 3.9230  | 0.6034  | -3.0094 |
| 23 | H    | -0.4715 | -2.1014 | -2.2224 |
| 24 | H    | -1.8427 | -5.5511 | -0.0735 |
| 25 | H    | -0.2254 | -5.0915 | 1.7550  |
| 26 | C    | -0.4138 | 0.1566  | 1.8079  |
| 27 | C    | 0.7950  | 0.7932  | 1.1770  |
| 28 | C    | 1.1123  | 0.1802  | -0.2089 |
| 29 | C    | -0.1519 | 0.3204  | -1.0900 |
| 30 | C    | -1.4861 | 0.4399  | -0.3948 |
| 31 | C    | -1.5559 | -0.0154 | 1.0078  |
| 32 | C    | -2.6720 | -0.6761 | 1.5403  |
| 33 | C    | -2.6753 | -1.1043 | 2.8620  |
| 34 | C    | -2.4795 | 0.9710  | -1.1505 |
| 35 | H    | -2.2095 | 1.1094  | -2.1946 |
| 36 | C    | -3.8294 | 1.4274  | -0.8166 |
| 37 | C    | 2.3338  | 0.8531  | -0.9483 |
| 38 | C    | 2.8455  | 2.1678  | -0.3967 |
| 39 | H    | 1.9765  | 1.0451  | -1.9607 |
| 40 | O    | -0.0725 | 0.3566  | -2.3062 |
| 41 | C    | -4.2101 | 1.9137  | 0.4475  |
| 42 | C    | -5.4934 | 2.3892  | 0.6699  |
| 43 | C    | -6.4592 | 2.3941  | -0.3464 |
| 44 | C    | -6.0795 | 1.9280  | -1.6074 |
| 45 | C    | -4.7880 | 1.4701  | -1.8425 |
| 46 | C    | 3.6509  | 2.2454  | 0.7489  |
| 47 | C    | 4.1176  | 3.4701  | 1.2144  |
| 48 | C    | 3.8058  | 4.6667  | 0.5593  |
| 49 | C    | 3.0029  | 4.5910  | -0.5804 |
| 50 | C    | 2.5353  | 3.3653  | -1.0499 |
| 51 | H    | 0.6094  | 1.8632  | 1.0284  |
| 52 | H    | 1.6558  | 0.7173  | 1.8352  |
| 53 | H    | -3.5345 | -0.8596 | 0.9121  |
| 54 | H    | -3.5454 | -1.6137 | 3.2606  |

|    |   |         |         |         |
|----|---|---------|---------|---------|
| 55 | H | -3.4883 | 1.9363  | 1.2532  |
| 56 | H | -5.7529 | 2.7720  | 1.6520  |
| 57 | H | -6.7987 | 1.9361  | -2.4199 |
| 58 | H | -4.5122 | 1.1335  | -2.8364 |
| 59 | H | 3.9063  | 1.3411  | 1.2898  |
| 60 | H | 4.7366  | 3.4968  | 2.1063  |
| 61 | H | 2.7408  | 5.5007  | -1.1120 |
| 62 | H | 1.9163  | 3.3375  | -1.9412 |
| 63 | C | -1.5578 | -0.8885 | 3.6695  |
| 64 | H | -1.5611 | -1.2147 | 4.7037  |
| 65 | C | -0.4298 | -0.2706 | 3.1368  |
| 66 | H | 0.4533  | -0.1247 | 3.7499  |
| 67 | C | 1.8713  | -3.5677 | 2.9143  |
| 68 | H | 1.0138  | -3.5933 | 3.5931  |
| 69 | H | 2.2084  | -4.5909 | 2.7240  |
| 70 | H | 2.6802  | -3.0011 | 3.3727  |
| 71 | C | 4.3433  | 5.9876  | 1.0552  |
| 72 | H | 4.3373  | 6.0361  | 2.1473  |
| 73 | H | 5.3782  | 6.1401  | 0.7293  |
| 74 | H | 3.7535  | 6.8253  | 0.6764  |
| 75 | C | -7.8601 | 2.8843  | -0.0787 |
| 76 | H | -8.4034 | 3.0674  | -1.0079 |
| 77 | H | -8.4300 | 2.1479  | 0.4985  |
| 78 | H | -7.8535 | 3.8123  | 0.4994  |
| 79 | H | -1.9561 | -4.0648 | -2.0463 |

TS4f

|    | Atom | X       | Y       | Z       |
|----|------|---------|---------|---------|
| 1  | C    | -0.9607 | 2.1065  | 0.5073  |
| 2  | N    | -1.7852 | 2.2493  | -0.5573 |
| 3  | C    | -3.0085 | 1.6556  | -0.6553 |
| 4  | C    | -1.4066 | 2.9621  | -1.8092 |
| 5  | C    | -2.5462 | 2.6309  | -2.7819 |
| 6  | C    | -3.7120 | 2.1936  | -1.8747 |
| 7  | H    | -3.5248 | 1.4924  | 0.2783  |
| 8  | C    | 0.4030  | 2.5652  | 0.6689  |
| 9  | C    | 0.7043  | 2.4296  | 2.0513  |
| 10 | N    | -0.4089 | 1.9419  | 2.7236  |
| 11 | C    | -1.4640 | 1.7271  | 1.8437  |
| 12 | C    | 1.4057  | 3.0326  | -0.1873 |
| 13 | C    | 2.6560  | 3.3669  | 0.3341  |
| 14 | C    | 2.9243  | 3.2324  | 1.6959  |
| 15 | C    | 1.9471  | 2.7546  | 2.5728  |
| 16 | O    | -2.5790 | 1.3315  | 2.1886  |
| 17 | H    | -1.3363 | 4.0291  | -1.5766 |
| 18 | H    | -0.4526 | 2.5935  | -2.1672 |
| 19 | H    | -2.7985 | 3.4813  | -3.4163 |
| 20 | H    | -2.2374 | 1.8056  | -3.4243 |
| 21 | H    | -4.3435 | 3.0452  | -1.5924 |
| 22 | H    | -4.3639 | 1.4504  | -2.3369 |
| 23 | H    | 1.2354  | 3.1345  | -1.2486 |
| 24 | H    | 3.9025  | 3.4957  | 2.0815  |
| 25 | H    | 2.1574  | 2.6377  | 3.6287  |
| 26 | C    | -0.1793 | -1.6338 | 1.7425  |
| 27 | C    | -1.5086 | -1.4942 | 1.0421  |
| 28 | C    | -1.4801 | -0.7024 | -0.2359 |
| 29 | C    | -0.2235 | -0.4430 | -0.9285 |
| 30 | C    | 1.0169  | -1.0953 | -0.3774 |
| 31 | C    | 1.0327  | -1.4239 | 1.0623  |
| 32 | C    | 2.2309  | -1.4528 | 1.7997  |
| 33 | C    | 2.2382  | -1.7659 | 3.1503  |
| 34 | C    | 1.9908  | -1.3240 | -1.2920 |
| 35 | H    | 1.7946  | -0.8611 | -2.2560 |
| 36 | C    | 3.2259  | -2.1147 | -1.2404 |
| 37 | C    | -2.6456 | -0.3585 | -0.9498 |
| 38 | C    | -3.9875 | -0.9571 | -0.7016 |
| 39 | H    | -2.4348 | -0.2039 | -2.0043 |
| 40 | O    | -0.1858 | 0.2015  | -1.9883 |
| 41 | C    | 3.3555  | -3.3122 | -0.5150 |
| 42 | C    | 4.5265  | -4.0547 | -0.5645 |
| 43 | C    | 5.6242  | -3.6393 | -1.3301 |
| 44 | C    | 5.4922  | -2.4600 | -2.0671 |
| 45 | C    | 4.3140  | -1.7214 | -2.0356 |
| 46 | C    | -4.6612 | -0.8986 | 0.5283  |
| 47 | C    | -5.9153 | -1.4801 | 0.6830  |
| 48 | C    | -6.5516 | -2.1410 | -0.3731 |
| 49 | C    | -5.8895 | -2.1847 | -1.6026 |
| 50 | C    | -4.6375 | -1.5995 | -1.7655 |
| 51 | H    | -1.9264 | -2.4925 | 0.8375  |
| 52 | H    | -2.2051 | -1.0294 | 1.7455  |
| 53 | H    | 3.1622  | -1.2199 | 1.3015  |
| 54 | H    | 3.1765  | -1.7870 | 3.6935  |

|    |   |         |         |         |
|----|---|---------|---------|---------|
| 55 | H | 2.5225  | -3.6698 | 0.0770  |
| 56 | H | 4.5894  | -4.9821 | -0.0032 |
| 57 | H | 6.3179  | -2.1203 | -2.6845 |
| 58 | H | 4.2314  | -0.8188 | -2.6322 |
| 59 | H | -4.2154 | -0.3706 | 1.3627  |
| 60 | H | -6.4134 | -1.4111 | 1.6453  |
| 61 | H | -6.3598 | -2.6793 | -2.4469 |
| 62 | H | -4.1469 | -1.6502 | -2.7322 |
| 63 | C | 1.0371  | -2.0434 | 3.8064  |
| 64 | H | 1.0331  | -2.3009 | 4.8600  |
| 65 | C | -0.1579 | -1.9584 | 3.1036  |
| 66 | H | -1.0994 | -2.1333 | 3.6151  |
| 67 | C | 6.9034  | -4.4392 | -1.3487 |
| 68 | H | 6.7022  | -5.5123 | -1.4073 |
| 69 | H | 7.5323  | -4.1660 | -2.1987 |
| 70 | H | 7.4883  | -4.2690 | -0.4378 |
| 71 | C | -7.8975 | -2.7975 | -0.1838 |
| 72 | H | -8.5238 | -2.2309 | 0.5098  |
| 73 | H | -8.4350 | -2.8865 | -1.1305 |
| 74 | H | -7.7883 | -3.8073 | 0.2273  |
| 75 | C | -0.4932 | 1.6765  | 4.1440  |
| 76 | H | -1.5124 | 1.3554  | 4.3533  |
| 77 | H | 0.2017  | 0.8843  | 4.4350  |
| 78 | H | -0.2756 | 2.5812  | 4.7196  |
| 79 | H | 3.4290  | 3.7300  | -0.3331 |

Prod5f

|    | Atom | X       | Y       | Z       |
|----|------|---------|---------|---------|
| 1  | C    | -2.1846 | -0.4440 | -0.7131 |
| 2  | N    | -3.0815 | -1.3055 | 0.0394  |
| 3  | C    | -2.4350 | -2.6135 | 0.3282  |
| 4  | C    | -4.4598 | -1.5167 | -0.4410 |
| 5  | C    | -4.7420 | -3.0023 | -0.1462 |
| 6  | C    | -3.3613 | -3.6642 | -0.2973 |
| 7  | H    | -2.4229 | -2.7592 | 1.4155  |
| 8  | C    | -2.5004 | 1.0370  | -0.6185 |
| 9  | C    | -2.4501 | 1.6033  | -1.9014 |
| 10 | N    | -2.2198 | 0.6052  | -2.8603 |
| 11 | C    | -2.2408 | -0.6482 | -2.2796 |
| 12 | C    | -2.8875 | 1.8178  | 0.4546  |
| 13 | C    | -3.1504 | 3.1793  | 0.2562  |
| 14 | C    | -3.0361 | 3.7383  | -1.0126 |
| 15 | C    | -2.6943 | 2.9523  | -2.1188 |
| 16 | O    | -2.3387 | -1.6927 | -2.8858 |
| 17 | H    | -5.1613 | -0.8507 | 0.0701  |
| 18 | H    | -4.5440 | -1.3294 | -1.5181 |
| 19 | H    | -5.1092 | -3.1213 | 0.8785  |
| 20 | H    | -5.4954 | -3.4181 | -0.8184 |
| 21 | H    | -3.2948 | -4.6364 | 0.1962  |
| 22 | H    | -3.1181 | -3.7881 | -1.3552 |
| 23 | H    | -2.9971 | 1.3753  | 1.4361  |
| 24 | H    | -3.2338 | 4.7948  | -1.1554 |
| 25 | H    | -2.6461 | 3.3823  | -3.1117 |
| 26 | C    | 0.0853  | 0.9203  | 1.4383  |
| 27 | C    | -0.4963 | -0.4616 | 1.2918  |
| 28 | C    | -0.7572 | -0.9229 | -0.1626 |
| 29 | C    | 0.4194  | -0.5358 | -1.0856 |
| 30 | C    | 1.4375  | 0.4536  | -0.5828 |
| 31 | C    | 1.0311  | 1.3669  | 0.5021  |
| 32 | C    | 1.5134  | 2.6826  | 0.5952  |
| 33 | C    | 1.1351  | 3.5067  | 1.6455  |
| 34 | C    | 2.6475  | 0.3753  | -1.1929 |
| 35 | H    | 2.6597  | -0.2896 | -2.0529 |
| 36 | C    | 3.9454  | 0.9808  | -0.8884 |
| 37 | C    | -1.0053 | -2.4850 | -0.2206 |
| 38 | C    | 0.0541  | -3.3783 | 0.3960  |
| 39 | H    | -1.0418 | -2.7207 | -1.2835 |
| 40 | O    | 0.5453  | -1.0751 | -2.1691 |
| 41 | C    | 4.3754  | 1.3127  | 0.4092  |
| 42 | C    | 5.6474  | 1.8186  | 0.6297  |
| 43 | C    | 6.5452  | 2.0289  | -0.4264 |
| 44 | C    | 6.1276  | 1.6836  | -1.7140 |
| 45 | C    | 4.8616  | 1.1545  | -1.9387 |
| 46 | C    | 1.0776  | -3.8770 | -0.4238 |
| 47 | C    | 2.0756  | -4.7003 | 0.0837  |
| 48 | C    | 2.0927  | -5.0728 | 1.4322  |
| 49 | C    | 1.0721  | -4.5850 | 2.2496  |
| 50 | C    | 0.0725  | -3.7548 | 1.7440  |
| 51 | H    | 0.2101  | -1.1747 | 1.7308  |
| 52 | H    | -1.4179 | -0.5447 | 1.8703  |
| 53 | H    | 2.1912  | 3.0547  | -0.1624 |
| 54 | H    | 1.5190  | 4.5189  | 1.7027  |

|    |   |         |         |         |
|----|---|---------|---------|---------|
| 55 | H | 3.7135  | 1.1533  | 1.2502  |
| 56 | H | 5.9558  | 2.0509  | 1.6443  |
| 57 | H | 6.8062  | 1.8165  | -2.5503 |
| 58 | H | 4.5698  | 0.8736  | -2.9453 |
| 59 | H | 1.0869  | -3.6054 | -1.4733 |
| 60 | H | 2.8528  | -5.0646 | -0.5815 |
| 61 | H | 1.0532  | -4.8579 | 3.3002  |
| 62 | H | -0.7012 | -3.4084 | 2.4190  |
| 63 | C | 0.2591  | 3.0303  | 2.6220  |
| 64 | H | -0.0294 | 3.6633  | 3.4537  |
| 65 | C | -0.2684 | 1.7500  | 2.5050  |
| 66 | H | -0.9779 | 1.3890  | 3.2429  |
| 67 | C | 7.9127  | 2.6128  | -0.1738 |
| 68 | H | 8.5756  | 2.4612  | -1.0281 |
| 69 | H | 7.8513  | 3.6911  | 0.0099  |
| 70 | H | 8.3823  | 2.1619  | 0.7046  |
| 71 | C | 3.1639  | -5.9896 | 1.9718  |
| 72 | H | 3.1743  | -5.9909 | 3.0638  |
| 73 | H | 3.0039  | -7.0216 | 1.6413  |
| 74 | H | 4.1566  | -5.6893 | 1.6251  |
| 75 | C | -2.2484 | 0.8075  | -4.2946 |
| 76 | H | -3.1990 | 1.2484  | -4.6129 |
| 77 | H | -1.4297 | 1.4616  | -4.6058 |
| 78 | H | -2.1304 | -0.1683 | -4.7627 |
| 79 | H | -3.4443 | 3.7986  | 1.0952  |

TS5f

|    | Atom | X       | Y       | Z       |
|----|------|---------|---------|---------|
| 1  | C    | -0.8892 | -0.7109 | 2.1324  |
| 2  | N    | -1.4320 | 0.4542  | 2.5457  |
| 3  | C    | -2.3632 | 1.1638  | 1.8370  |
| 4  | C    | -0.9492 | 1.2164  | 3.7435  |
| 5  | C    | -1.5900 | 2.5954  | 3.5727  |
| 6  | C    | -2.8157 | 2.3349  | 2.6773  |
| 7  | H    | -3.0957 | 0.5984  | 1.2823  |
| 8  | C    | -1.4845 | -1.7669 | 1.3390  |
| 9  | C    | -0.5700 | -2.8570 | 1.3745  |
| 10 | N    | 0.5304  | -2.5170 | 2.1462  |
| 11 | C    | 0.3845  | -1.2415 | 2.6917  |
| 12 | C    | -2.6948 | -1.9434 | 0.6602  |
| 13 | C    | -2.9703 | -3.1623 | 0.0328  |
| 14 | C    | -2.0478 | -4.2053 | 0.0659  |
| 15 | C    | -0.8335 | -4.0626 | 0.7445  |
| 16 | O    | 1.1790  | -0.7268 | 3.4619  |
| 17 | H    | -1.3208 | 0.6867  | 4.6268  |
| 18 | H    | 0.1332  | 1.2252  | 3.7644  |
| 19 | H    | -1.8550 | 3.0414  | 4.5322  |
| 20 | H    | -0.8831 | 3.2539  | 3.0674  |
| 21 | H    | -3.6939 | 2.0539  | 3.2720  |
| 22 | H    | -3.1011 | 3.1929  | 2.0664  |
| 23 | H    | -3.4421 | -1.1630 | 0.6247  |
| 24 | H    | -2.2718 | -5.1405 | -0.4340 |
| 25 | H    | -0.1197 | -4.8762 | 0.7803  |
| 26 | C    | 0.7487  | -0.8731 | -1.4820 |
| 27 | C    | -0.4268 | 0.0635  | -1.3372 |
| 28 | C    | -0.3652 | 0.9984  | -0.1626 |
| 29 | C    | 0.8939  | 1.2378  | 0.5363  |
| 30 | C    | 2.1381  | 0.5986  | -0.0244 |
| 31 | C    | 1.9733  | -0.6212 | -0.8400 |
| 32 | C    | 2.9884  | -1.5932 | -0.9297 |
| 33 | C    | 2.8259  | -2.7378 | -1.6952 |
| 34 | C    | 3.2901  | 1.2396  | 0.2902  |
| 35 | H    | 3.1557  | 2.0248  | 1.0300  |
| 36 | C    | 4.6635  | 1.1031  | -0.2079 |
| 37 | C    | -1.4141 | 1.8810  | 0.1946  |
| 38 | C    | -2.5397 | 2.2633  | -0.7061 |
| 39 | H    | -1.0215 | 2.7338  | 0.7402  |
| 40 | O    | 0.9608  | 2.0267  | 1.4885  |
| 41 | C    | 4.9807  | 0.8038  | -1.5444 |
| 42 | C    | 6.2996  | 0.7617  | -1.9739 |
| 43 | C    | 7.3627  | 1.0074  | -1.0949 |
| 44 | C    | 7.0502  | 1.3233  | 0.2297  |
| 45 | C    | 5.7294  | 1.3854  | 0.6613  |
| 46 | C    | -2.7943 | 3.6302  | -0.9007 |
| 47 | C    | -3.8277 | 4.0697  | -1.7210 |
| 48 | C    | -4.6635 | 3.1633  | -2.3796 |
| 49 | C    | -4.4249 | 1.8011  | -2.1769 |
| 50 | C    | -3.3886 | 1.3582  | -1.3602 |
| 51 | H    | -0.5479 | 0.6507  | -2.2614 |
| 52 | H    | -1.3256 | -0.5583 | -1.2775 |
| 53 | H    | 3.9123  | -1.4417 | -0.3882 |
| 54 | H    | 3.6279  | -3.4657 | -1.7532 |

|    |   |         |         |         |
|----|---|---------|---------|---------|
| 55 | H | 4.1829  | 0.6215  | -2.2536 |
| 56 | H | 6.5105  | 0.5415  | -3.0160 |
| 57 | H | 7.8504  | 1.5364  | 0.9315  |
| 58 | H | 5.5132  | 1.6509  | 1.6908  |
| 59 | H | -2.1605 | 4.3595  | -0.4071 |
| 60 | H | -3.9876 | 5.1357  | -1.8492 |
| 61 | H | -5.0626 | 1.0703  | -2.6647 |
| 62 | H | -3.2518 | 0.2924  | -1.2297 |
| 63 | C | 1.6289  | -2.9516 | -2.3818 |
| 64 | H | 1.4929  | -3.8414 | -2.9863 |
| 65 | C | 0.5999  | -2.0290 | -2.2563 |
| 66 | H | -0.3495 | -2.2110 | -2.7496 |
| 67 | C | -5.7663 | 3.6377  | -3.2940 |
| 68 | H | -6.1701 | 4.5988  | -2.9670 |
| 69 | H | -5.3985 | 3.7696  | -4.3176 |
| 70 | H | -6.5891 | 2.9200  | -3.3332 |
| 71 | C | 8.7937  | 0.9254  | -1.5664 |
| 72 | H | 8.9128  | 1.3683  | -2.5589 |
| 73 | H | 9.4694  | 1.4426  | -0.8818 |
| 74 | H | 9.1276  | -0.1160 | -1.6344 |
| 75 | C | 1.6768  | -3.3596 | 2.4131  |
| 76 | H | 2.3440  | -2.7975 | 3.0648  |
| 77 | H | 1.3759  | -4.2839 | 2.9162  |
| 78 | H | 2.1994  | -3.6059 | 1.4850  |
| 79 | H | -3.9139 | -3.2918 | -0.4844 |



Prod4g

|    | Atom | X       | Y       | Z       |
|----|------|---------|---------|---------|
| 1  | C    | 1.5361  | -1.3586 | -0.1813 |
| 2  | N    | 2.6504  | -1.5015 | -1.1163 |
| 3  | C    | 3.3917  | -0.2302 | -1.1239 |
| 4  | C    | 2.4488  | -1.9222 | -2.5153 |
| 5  | C    | 3.8010  | -1.5612 | -3.1338 |
| 6  | C    | 4.1549  | -0.2120 | -2.4689 |
| 7  | H    | 4.0740  | -0.2125 | -0.2750 |
| 8  | C    | 0.4762  | -2.4426 | -0.3292 |
| 9  | C    | 0.5556  | -3.3046 | 0.7758  |
| 10 | N    | 1.5516  | -2.8736 | 1.6582  |
| 11 | C    | 2.1596  | -1.7255 | 1.2079  |
| 12 | C    | -0.4424 | -2.7181 | -1.3321 |
| 13 | C    | -1.2794 | -3.8348 | -1.2139 |
| 14 | C    | -1.1903 | -4.6705 | -0.1056 |
| 15 | C    | -0.2644 | -4.4163 | 0.9100  |
| 16 | O    | 3.0558  | -1.1416 | 1.7875  |
| 17 | H    | 2.2281  | -2.9892 | -2.5674 |
| 18 | H    | 1.6426  | -1.3721 | -3.0179 |
| 19 | H    | 4.5401  | -2.3202 | -2.8649 |
| 20 | H    | 3.7568  | -1.5002 | -4.2232 |
| 21 | H    | 5.2302  | -0.0928 | -2.3276 |
| 22 | H    | 3.8157  | 0.6247  | -3.0850 |
| 23 | H    | -0.5225 | -2.0804 | -2.2017 |
| 24 | H    | -1.8431 | -5.5323 | -0.0250 |
| 25 | H    | -0.1914 | -5.0688 | 1.7711  |
| 26 | C    | -0.4272 | 0.1677  | 1.8037  |
| 27 | C    | 0.7801  | 0.8094  | 1.1746  |
| 28 | C    | 1.0970  | 0.2058  | -0.2157 |
| 29 | C    | -0.1683 | 0.3477  | -1.0939 |
| 30 | C    | -1.5024 | 0.4598  | -0.3957 |
| 31 | C    | -1.5696 | -0.0036 | 1.0043  |
| 32 | C    | -2.6832 | -0.6705 | 1.5344  |
| 33 | C    | -2.6841 | -1.1046 | 2.8541  |
| 34 | C    | -2.4964 | 0.9950  | -1.1465 |
| 35 | H    | -2.2287 | 1.1419  | -2.1899 |
| 36 | C    | -3.8468 | 1.4470  | -0.8051 |
| 37 | C    | 2.3156  | 0.8854  | -0.9551 |
| 38 | C    | 2.8527  | 2.1771  | -0.3736 |
| 39 | H    | 1.9466  | 1.1105  | -1.9562 |
| 40 | O    | -0.0919 | 0.3918  | -2.3098 |
| 41 | C    | -4.2171 | 1.9276  | 0.4643  |
| 42 | C    | -5.4997 | 2.3992  | 0.7067  |
| 43 | C    | -6.4279 | 2.3858  | -0.3263 |
| 44 | C    | -6.1034 | 1.9370  | -1.5969 |
| 45 | C    | -4.8096 | 1.4863  | -1.8298 |
| 46 | C    | 3.6627  | 2.2058  | 0.7720  |
| 47 | C    | 4.1621  | 3.4047  | 1.2724  |
| 48 | C    | 3.8491  | 4.5866  | 0.6184  |
| 49 | C    | 3.0554  | 4.6041  | -0.5161 |
| 50 | C    | 2.5652  | 3.3943  | -1.0035 |
| 51 | H    | 0.5937  | 1.8805  | 1.0344  |
| 52 | H    | 1.6411  | 0.7292  | 1.8321  |
| 53 | H    | -3.5450 | -0.8561 | 0.9057  |
| 54 | H    | -3.5518 | -1.6191 | 3.2511  |

|    |   |         |         |         |
|----|---|---------|---------|---------|
| 55 | H | -3.4902 | 1.9466  | 1.2647  |
| 56 | H | -5.7880 | 2.7814  | 1.6780  |
| 57 | H | -6.8502 | 1.9565  | -2.3806 |
| 58 | H | -4.5369 | 1.1499  | -2.8240 |
| 59 | H | 3.8995  | 1.2820  | 1.2868  |
| 60 | H | 4.7876  | 3.4327  | 2.1562  |
| 61 | H | 2.8360  | 5.5459  | -1.0038 |
| 62 | H | 1.9476  | 3.3973  | -1.8955 |
| 63 | C | -1.5667 | -0.8883 | 3.6615  |
| 64 | H | -1.5683 | -1.2188 | 4.6943  |
| 65 | C | -0.4408 | -0.2650 | 3.1307  |
| 66 | H | 0.4418  | -0.1189 | 3.7443  |
| 67 | C | 1.9256  | -3.5400 | 2.8886  |
| 68 | H | 1.0819  | -3.5703 | 3.5843  |
| 69 | H | 2.2630  | -4.5614 | 2.6898  |
| 70 | H | 2.7411  | -2.9709 | 3.3319  |
| 71 | F | 4.3349  | 5.7543  | 1.1012  |
| 72 | F | -7.6776 | 2.8359  | -0.0883 |
| 73 | H | -1.9990 | -4.0473 | -1.9956 |

TS4g

|    | Atom | X       | Y       | Z       |
|----|------|---------|---------|---------|
| 1  | C    | -0.9564 | 2.0930  | 0.5000  |
| 2  | N    | -1.7790 | 2.2393  | -0.5650 |
| 3  | C    | -3.0066 | 1.6558  | -0.6633 |
| 4  | C    | -1.3951 | 2.9501  | -1.8171 |
| 5  | C    | -2.5327 | 2.6205  | -2.7922 |
| 6  | C    | -3.7033 | 2.1922  | -1.8870 |
| 7  | H    | -3.5254 | 1.4992  | 0.2700  |
| 8  | C    | 0.4078  | 2.5497  | 0.6650  |
| 9  | C    | 0.7064  | 2.4099  | 2.0473  |
| 10 | N    | -0.4087 | 1.9214  | 2.7167  |
| 11 | C    | -1.4620 | 1.7106  | 1.8353  |
| 12 | C    | 1.4120  | 3.0200  | -0.1881 |
| 13 | C    | 2.6616  | 3.3517  | 0.3365  |
| 14 | C    | 2.9274  | 3.2122  | 1.6984  |
| 15 | C    | 1.9483  | 2.7325  | 2.5721  |
| 16 | O    | -2.5784 | 1.3150  | 2.1767  |
| 17 | H    | -1.3233 | 4.0171  | -1.5847 |
| 18 | H    | -0.4409 | 2.5792  | -2.1718 |
| 19 | H    | -2.7793 | 3.4697  | -3.4303 |
| 20 | H    | -2.2251 | 1.7915  | -3.4303 |
| 21 | H    | -4.3323 | 3.0474  | -1.6104 |
| 22 | H    | -4.3572 | 1.4506  | -2.3493 |
| 23 | H    | 1.2432  | 3.1273  | -1.2491 |
| 24 | H    | 3.9048  | 3.4742  | 2.0866  |
| 25 | H    | 2.1566  | 2.6129  | 3.6281  |
| 26 | C    | -0.1691 | -1.6466 | 1.7291  |
| 27 | C    | -1.5036 | -1.5083 | 1.0381  |
| 28 | C    | -1.4851 | -0.7156 | -0.2400 |
| 29 | C    | -0.2345 | -0.4582 | -0.9431 |
| 30 | C    | 1.0109  | -1.1080 | -0.3993 |
| 31 | C    | 1.0377  | -1.4339 | 1.0409  |
| 32 | C    | 2.2410  | -1.4593 | 1.7701  |
| 33 | C    | 2.2584  | -1.7731 | 3.1204  |
| 34 | C    | 1.9768  | -1.3389 | -1.3209 |
| 35 | H    | 1.7730  | -0.8806 | -2.2854 |
| 36 | C    | 3.2128  | -2.1296 | -1.2741 |
| 37 | C    | -2.6550 | -0.3702 | -0.9447 |
| 38 | C    | -3.9970 | -0.9606 | -0.6779 |
| 39 | H    | -2.4553 | -0.2198 | -2.0018 |
| 40 | O    | -0.2045 | 0.1824  | -2.0053 |
| 41 | C    | 3.3392  | -3.3268 | -0.5474 |
| 42 | C    | 4.5078  | -4.0762 | -0.5908 |
| 43 | C    | 5.5665  | -3.6252 | -1.3669 |
| 44 | C    | 5.4811  | -2.4611 | -2.1136 |
| 45 | C    | 4.2986  | -1.7303 | -2.0724 |
| 46 | C    | -4.6549 | -0.8813 | 0.5604  |
| 47 | C    | -5.9089 | -1.4554 | 0.7463  |
| 48 | C    | -6.5129 | -2.1115 | -0.3152 |
| 49 | C    | -5.9061 | -2.2011 | -1.5576 |
| 50 | C    | -4.6543 | -1.6177 | -1.7300 |
| 51 | H    | -1.9213 | -2.5072 | 0.8364  |
| 52 | H    | -2.1947 | -1.0446 | 1.7474  |
| 53 | H    | 3.1683  | -1.2215 | 1.2666  |
| 54 | H    | 3.2001  | -1.7913 | 3.6575  |

|    |   |         |         |         |
|----|---|---------|---------|---------|
| 55 | H | 2.5076  | -3.6809 | 0.0476  |
| 56 | H | 4.6062  | -5.0040 | -0.0408 |
| 57 | H | 6.3231  | -2.1485 | -2.7186 |
| 58 | H | 4.2135  | -0.8255 | -2.6641 |
| 59 | H | -4.1955 | -0.3449 | 1.3815  |
| 60 | H | -6.4226 | -1.3931 | 1.6977  |
| 61 | H | -6.4100 | -2.7165 | -2.3658 |
| 62 | H | -4.1693 | -1.6858 | -2.6978 |
| 63 | C | 1.0625  | -2.0549 | 3.7841  |
| 64 | H | 1.0665  | -2.3137 | 4.8372  |
| 65 | C | -0.1375 | -1.9724 | 3.0896  |
| 66 | H | -1.0748 | -2.1504 | 3.6077  |
| 67 | C | -0.4961 | 1.6561  | 4.1374  |
| 68 | H | -1.5155 | 1.3349  | 4.3450  |
| 69 | H | 0.1986  | 0.8643  | 4.4296  |
| 70 | H | -0.2798 | 2.5610  | 4.7129  |
| 71 | H | 3.4355  | 3.7177  | -0.3278 |
| 72 | F | 6.7073  | -4.3500 | -1.4055 |
| 73 | F | -7.7314 | -2.6706 | -0.1361 |

Prod5g

|    | Atom | X       | Y       | Z       |
|----|------|---------|---------|---------|
| 1  | C    | -2.1690 | -0.4472 | -0.7091 |
| 2  | N    | -3.0706 | -1.3084 | 0.0381  |
| 3  | C    | -2.4305 | -2.6190 | 0.3262  |
| 4  | C    | -4.4484 | -1.5132 | -0.4473 |
| 5  | C    | -4.7378 | -2.9976 | -0.1541 |
| 6  | C    | -3.3596 | -3.6654 | -0.3024 |
| 7  | H    | -2.4207 | -2.7663 | 1.4135  |
| 8  | C    | -2.4828 | 1.0339  | -0.6105 |
| 9  | C    | -2.4287 | 1.6041  | -1.8913 |
| 10 | N    | -2.1952 | 0.6088  | -2.8531 |
| 11 | C    | -2.2193 | -0.6459 | -2.2767 |
| 12 | C    | -2.8740 | 1.8110  | 0.4639  |
| 13 | C    | -3.1365 | 3.1729  | 0.2690  |
| 14 | C    | -3.0183 | 3.7360  | -0.9978 |
| 15 | C    | -2.6728 | 2.9536  | -2.1054 |
| 16 | O    | -2.3114 | -1.6893 | -2.8861 |
| 17 | H    | -5.1484 | -0.8443 | 0.0616  |
| 18 | H    | -4.5276 | -1.3251 | -1.5246 |
| 19 | H    | -5.1081 | -3.1158 | 0.8695  |
| 20 | H    | -5.4911 | -3.4099 | -0.8284 |
| 21 | H    | -3.2989 | -4.6384 | 0.1900  |
| 22 | H    | -3.1144 | -3.7893 | -1.3599 |
| 23 | H    | -2.9875 | 1.3652  | 1.4436  |
| 24 | H    | -3.2163 | 4.7927  | -1.1379 |
| 25 | H    | -2.6222 | 3.3868  | -3.0968 |
| 26 | C    | 0.0935  | 0.9087  | 1.4455  |
| 27 | C    | -0.4822 | -0.4758 | 1.2977  |
| 28 | C    | -0.7443 | -0.9339 | -0.1574 |
| 29 | C    | 0.4362  | -0.5510 | -1.0765 |
| 30 | C    | 1.4428  | 0.4545  | -0.5801 |
| 31 | C    | 1.0307  | 1.3646  | 0.5053  |
| 32 | C    | 1.5017  | 2.6845  | 0.5973  |
| 33 | C    | 1.1229  | 3.5035  | 1.6513  |
| 34 | C    | 2.6519  | 0.3874  | -1.1925 |
| 35 | H    | 2.6703  | -0.2802 | -2.0503 |
| 36 | C    | 3.9438  | 1.0079  | -0.8903 |
| 37 | C    | -1.0000 | -2.4939 | -0.2209 |
| 38 | C    | 0.0556  | -3.3952 | 0.3905  |
| 39 | H    | -1.0382 | -2.7254 | -1.2845 |
| 40 | O    | 0.5772  | -1.1065 | -2.1498 |
| 41 | C    | 4.3689  | 1.3370  | 0.4098  |
| 42 | C    | 5.6338  | 1.8594  | 0.6404  |
| 43 | C    | 6.4839  | 2.0643  | -0.4386 |
| 44 | C    | 6.1141  | 1.7396  | -1.7343 |
| 45 | C    | 4.8521  | 1.1975  | -1.9471 |
| 46 | C    | 1.0690  | -3.9006 | -0.4380 |
| 47 | C    | 2.0669  | -4.7357 | 0.0550  |
| 48 | C    | 2.0453  | -5.0776 | 1.3977  |
| 49 | C    | 1.0596  | -4.6112 | 2.2513  |
| 50 | C    | 0.0712  | -3.7719 | 1.7406  |
| 51 | H    | 0.2278  | -1.1868 | 1.7346  |
| 52 | H    | -1.4027 | -0.5628 | 1.8774  |
| 53 | H    | 2.1700  | 3.0650  | -0.1647 |
| 54 | H    | 1.4976  | 4.5192  | 1.7076  |

|    |   |         |         |         |
|----|---|---------|---------|---------|
| 55 | H | 3.7087  | 1.1673  | 1.2495  |
| 56 | H | 5.9721  | 2.1032  | 1.6398  |
| 57 | H | 6.8107  | 1.8992  | -2.5477 |
| 58 | H | 4.5573  | 0.9205  | -2.9532 |
| 59 | H | 1.0736  | -3.6279 | -1.4866 |
| 60 | H | 2.8481  | -5.1261 | -0.5856 |
| 61 | H | 1.0695  | -4.9070 | 3.2931  |
| 62 | H | -0.6995 | -3.4202 | 2.4151  |
| 63 | C | 0.2577  | 3.0173  | 2.6327  |
| 64 | H | -0.0304 | 3.6462  | 3.4675  |
| 65 | C | -0.2603 | 1.7332  | 2.5162  |
| 66 | H | -0.9628 | 1.3655  | 3.2574  |
| 67 | C | -2.2221 | 0.8160  | -4.2871 |
| 68 | H | -3.1734 | 1.2558  | -4.6050 |
| 69 | H | -1.4047 | 1.4732  | -4.5947 |
| 70 | H | -2.1013 | -0.1578 | -4.7587 |
| 71 | H | -3.4341 | 3.7893  | 1.1088  |
| 72 | F | 7.7106  | 2.5815  | -0.2157 |
| 73 | F | 3.0074  | -5.8938 | 1.8867  |

TS5g

|    | Atom | X       | Y       | Z       |
|----|------|---------|---------|---------|
| 1  | C    | -0.8787 | -0.6889 | 2.1320  |
| 2  | N    | -1.4211 | 0.4782  | 2.5380  |
| 3  | C    | -2.3593 | 1.1792  | 1.8307  |
| 4  | C    | -0.9348 | 1.2509  | 3.7285  |
| 5  | C    | -1.5803 | 2.6266  | 3.5506  |
| 6  | C    | -2.8098 | 2.3560  | 2.6636  |
| 7  | H    | -3.0923 | 0.6073  | 1.2834  |
| 8  | C    | -1.4749 | -1.7518 | 1.3485  |
| 9  | C    | -0.5579 | -2.8395 | 1.3885  |
| 10 | N    | 0.5452  | -2.4919 | 2.1534  |
| 11 | C    | 0.3995  | -1.2129 | 2.6895  |
| 12 | C    | -2.6880 | -1.9359 | 0.6766  |
| 13 | C    | -2.9637 | -3.1599 | 0.0594  |
| 14 | C    | -2.0383 | -4.2003 | 0.0961  |
| 15 | C    | -0.8215 | -4.0503 | 0.7685  |
| 16 | O    | 1.1963  | -0.6893 | 3.4509  |
| 17 | H    | -1.3011 | 0.7260  | 4.6167  |
| 18 | H    | 0.1476  | 1.2626  | 3.7443  |
| 19 | H    | -1.8420 | 3.0787  | 4.5080  |
| 20 | H    | -0.8778 | 3.2835  | 3.0373  |
| 21 | H    | -3.6846 | 2.0783  | 3.2647  |
| 22 | H    | -3.1003 | 3.2091  | 2.0480  |
| 23 | H    | -3.4385 | -1.1585 | 0.6413  |
| 24 | H    | -2.2626 | -5.1398 | -0.3955 |
| 25 | H    | -0.1064 | -4.8624 | 0.8078  |
| 26 | C    | 0.7552  | -0.8750 | -1.4849 |
| 27 | C    | -0.4241 | 0.0578  | -1.3453 |
| 28 | C    | -0.3639 | 1.0038  | -0.1795 |
| 29 | C    | 0.8942  | 1.2527  | 0.5169  |
| 30 | C    | 2.1401  | 0.6098  | -0.0367 |
| 31 | C    | 1.9786  | -0.6164 | -0.8434 |
| 32 | C    | 2.9960  | -1.5866 | -0.9260 |
| 33 | C    | 2.8376  | -2.7356 | -1.6858 |
| 34 | C    | 3.2896  | 1.2558  | 0.2742  |
| 35 | H    | 3.1535  | 2.0481  | 1.0060  |
| 36 | C    | 4.6639  | 1.1155  | -0.2225 |
| 37 | C    | -1.4141 | 1.8860  | 0.1724  |
| 38 | C    | -2.5431 | 2.2569  | -0.7286 |
| 39 | H    | -1.0244 | 2.7441  | 0.7114  |
| 40 | O    | 0.9603  | 2.0515  | 1.4606  |
| 41 | C    | 4.9751  | 0.8140  | -1.5601 |
| 42 | C    | 6.2917  | 0.7620  | -1.9996 |
| 43 | C    | 7.3123  | 1.0110  | -1.0924 |
| 44 | C    | 7.0526  | 1.3291  | 0.2311  |
| 45 | C    | 5.7286  | 1.3936  | 0.6521  |
| 46 | C    | -2.7973 | 3.6232  | -0.9354 |
| 47 | C    | -3.8306 | 4.0621  | -1.7571 |
| 48 | C    | -4.6331 | 3.1175  | -2.3765 |
| 49 | C    | -4.4289 | 1.7590  | -2.1943 |
| 50 | C    | -3.3876 | 1.3382  | -1.3718 |
| 51 | H    | -0.5507 | 0.6348  | -2.2752 |
| 52 | H    | -1.3188 | -0.5692 | -1.2765 |
| 53 | H    | 3.9181  | -1.4318 | -0.3823 |
| 54 | H    | 3.6411  | -3.4620 | -1.7385 |

|    |   |         |         |         |
|----|---|---------|---------|---------|
| 55 | H | 4.1753  | 0.6316  | -2.2662 |
| 56 | H | 6.5365  | 0.5406  | -3.0311 |
| 57 | H | 7.8750  | 1.5305  | 0.9062  |
| 58 | H | 5.5107  | 1.6558  | 1.6814  |
| 59 | H | -2.1611 | 4.3571  | -0.4532 |
| 60 | H | -4.0177 | 5.1161  | -1.9207 |
| 61 | H | -5.0796 | 1.0497  | -2.6907 |
| 62 | H | -3.2429 | 0.2752  | -1.2317 |
| 63 | C | 1.6423  | -2.9554 | -2.3735 |
| 64 | H | 1.5098  | -3.8482 | -2.9742 |
| 65 | C | 0.6107  | -2.0351 | -2.2537 |
| 66 | H | -0.3374 | -2.2222 | -2.7478 |
| 67 | C | 1.6917  | -3.3329 | 2.4260  |
| 68 | H | 2.3605  | -2.7656 | 3.0715  |
| 69 | H | 1.3907  | -4.2522 | 2.9381  |
| 70 | H | 2.2125  | -3.5881 | 1.4995  |
| 71 | H | -3.9096 | -3.2960 | -0.4516 |
| 72 | F | 8.5952  | 0.9549  | -1.5166 |
| 73 | F | -5.6426 | 3.5303  | -3.1745 |



Prod4h

|    | Atom | X       | Y       | Z       |
|----|------|---------|---------|---------|
| 1  | C    | 1.5417  | -1.3466 | -0.1759 |
| 2  | N    | 2.6499  | -1.4940 | -1.1135 |
| 3  | C    | 3.3959  | -0.2275 | -1.1362 |
| 4  | C    | 2.4553  | -1.9450 | -2.5039 |
| 5  | C    | 3.8059  | -1.5855 | -3.1260 |
| 6  | C    | 4.1425  | -0.2184 | -2.4906 |
| 7  | H    | 4.0892  | -0.2073 | -0.2961 |
| 8  | C    | 0.4822  | -2.4324 | -0.3095 |
| 9  | C    | 0.5638  | -3.2801 | 0.8060  |
| 10 | N    | 1.5612  | -2.8375 | 1.6823  |
| 11 | C    | 2.1678  | -1.6963 | 1.2167  |
| 12 | C    | -0.4359 | -2.7217 | -1.3091 |
| 13 | C    | -1.2716 | -3.8375 | -1.1763 |
| 14 | C    | -1.1808 | -4.6588 | -0.0572 |
| 15 | C    | -0.2547 | -4.3910 | 0.9544  |
| 16 | O    | 3.0645  | -1.1023 | 1.7857  |
| 17 | H    | 2.2435  | -3.0145 | -2.5340 |
| 18 | H    | 1.6461  | -1.4122 | -3.0200 |
| 19 | H    | 4.5516  | -2.3306 | -2.8376 |
| 20 | H    | 3.7651  | -1.5487 | -4.2165 |
| 21 | H    | 5.2166  | -0.0743 | -2.3653 |
| 22 | H    | 3.7777  | 0.5982  | -3.1191 |
| 23 | H    | -0.5155 | -2.0970 | -2.1882 |
| 24 | H    | -1.8322 | -5.5205 | 0.0342  |
| 25 | H    | -0.1799 | -5.0335 | 1.8229  |
| 26 | C    | -0.4442 | 0.1869  | 1.7838  |
| 27 | C    | 0.7683  | 0.8284  | 1.1636  |
| 28 | C    | 1.1017  | 0.2190  | -0.2209 |
| 29 | C    | -0.1541 | 0.3511  | -1.1121 |
| 30 | C    | -1.4987 | 0.4559  | -0.4263 |
| 31 | C    | -1.5776 | 0.0018  | 0.9746  |
| 32 | C    | -2.6954 | -0.6627 | 1.4988  |
| 33 | C    | -2.7096 | -1.0809 | 2.8233  |
| 34 | C    | -2.4892 | 0.9762  | -1.1901 |
| 35 | H    | -2.2195 | 1.1206  | -2.2334 |
| 36 | C    | -3.8478 | 1.4083  | -0.8511 |
| 37 | C    | 2.3246  | 0.8949  | -0.9561 |
| 38 | C    | 2.8725  | 2.1731  | -0.3588 |
| 39 | H    | 1.9576  | 1.1349  | -1.9542 |
| 40 | O    | -0.0694 | 0.3925  | -2.3262 |
| 41 | C    | -4.2042 | 1.9456  | 0.3991  |
| 42 | C    | -5.4920 | 2.3936  | 0.6411  |
| 43 | C    | -6.4701 | 2.3103  | -0.3629 |
| 44 | C    | -6.1265 | 1.7935  | -1.6195 |
| 45 | C    | -4.8293 | 1.3662  | -1.8576 |
| 46 | C    | 3.6723  | 2.1787  | 0.7950  |
| 47 | C    | 4.1835  | 3.3639  | 1.3052  |
| 48 | C    | 3.9078  | 4.5831  | 0.6693  |
| 49 | C    | 3.1138  | 4.5926  | -0.4846 |
| 50 | C    | 2.6096  | 3.3987  | -0.9848 |
| 51 | H    | 0.5811  | 1.8990  | 1.0197  |
| 52 | H    | 1.6216  | 0.7510  | 1.8313  |
| 53 | H    | -3.5484 | -0.8611 | 0.8622  |
| 54 | H    | -3.5796 | -1.5939 | 3.2168  |

|    |   |         |         |         |
|----|---|---------|---------|---------|
| 55 | H | -3.4609 | 2.0249  | 1.1808  |
| 56 | H | -5.7510 | 2.8146  | 1.6047  |
| 57 | H | -6.8744 | 1.7406  | -2.4007 |
| 58 | H | -4.5660 | 0.9835  | -2.8373 |
| 59 | H | 3.8882  | 1.2464  | 1.3035  |
| 60 | H | 4.7987  | 3.3542  | 2.1967  |
| 61 | H | 2.9014  | 5.5308  | -0.9823 |
| 62 | H | 2.0014  | 3.4160  | -1.8828 |
| 63 | C | -1.6021 | -0.8502 | 3.6403  |
| 64 | H | -1.6146 | -1.1678 | 4.6769  |
| 65 | C | -0.4719 | -0.2296 | 3.1156  |
| 66 | H | 0.4021  | -0.0721 | 3.7385  |
| 67 | C | 1.9412  | -3.4924 | 2.9179  |
| 68 | H | 1.0993  | -3.5208 | 3.6154  |
| 69 | H | 2.2823  | -4.5138 | 2.7261  |
| 70 | H | 2.7553  | -2.9167 | 3.3549  |
| 71 | H | -1.9904 | -4.0619 | -1.9553 |
| 72 | C | 4.4342  | 5.8056  | 1.1932  |
| 73 | N | 4.8584  | 6.7931  | 1.6172  |
| 74 | C | -7.8025 | 2.7614  | -0.1090 |
| 75 | N | -8.8802 | 3.1236  | 0.0971  |

TS4h

|    | Atom | X       | Y       | Z       |
|----|------|---------|---------|---------|
| 1  | C    | -0.9604 | 2.0820  | 0.4961  |
| 2  | N    | -1.7813 | 2.2315  | -0.5687 |
| 3  | C    | -3.0136 | 1.6606  | -0.6680 |
| 4  | C    | -1.3917 | 2.9413  | -1.8210 |
| 5  | C    | -2.5299 | 2.6193  | -2.7976 |
| 6  | C    | -3.7043 | 2.1975  | -1.8942 |
| 7  | H    | -3.5330 | 1.5013  | 0.2646  |
| 8  | C    | 0.4017  | 2.5433  | 0.6662  |
| 9  | C    | 0.6948  | 2.4041  | 2.0494  |
| 10 | N    | -0.4214 | 1.9108  | 2.7153  |
| 11 | C    | -1.4693 | 1.6958  | 1.8312  |
| 12 | C    | 1.4065  | 3.0196  | -0.1830 |
| 13 | C    | 2.6524  | 3.3561  | 0.3467  |
| 14 | C    | 2.9131  | 3.2163  | 1.7096  |
| 15 | C    | 1.9330  | 2.7319  | 2.5794  |
| 16 | O    | -2.5855 | 1.2949  | 2.1652  |
| 17 | H    | -1.3143 | 4.0071  | -1.5866 |
| 18 | H    | -0.4388 | 2.5650  | -2.1737 |
| 19 | H    | -2.7708 | 3.4705  | -3.4348 |
| 20 | H    | -2.2268 | 1.7896  | -3.4371 |
| 21 | H    | -4.3301 | 3.0557  | -1.6196 |
| 22 | H    | -4.3613 | 1.4597  | -2.3582 |
| 23 | H    | 1.2407  | 3.1292  | -1.2443 |
| 24 | H    | 3.8876  | 3.4831  | 2.1020  |
| 25 | H    | 2.1376  | 2.6142  | 3.6362  |
| 26 | C    | -0.1608 | -1.6498 | 1.7242  |
| 27 | C    | -1.4960 | -1.5230 | 1.0324  |
| 28 | C    | -1.4833 | -0.7273 | -0.2447 |
| 29 | C    | -0.2351 | -0.4680 | -0.9511 |
| 30 | C    | 1.0139  | -1.1109 | -0.4042 |
| 31 | C    | 1.0448  | -1.4285 | 1.0363  |
| 32 | C    | 2.2492  | -1.4435 | 1.7637  |
| 33 | C    | 2.2697  | -1.7575 | 3.1138  |
| 34 | C    | 1.9801  | -1.3417 | -1.3255 |
| 35 | H    | 1.7790  | -0.8876 | -2.2927 |
| 36 | C    | 3.2167  | -2.1279 | -1.2686 |
| 37 | C    | -2.6525 | -0.3816 | -0.9491 |
| 38 | C    | -3.9928 | -0.9677 | -0.6784 |
| 39 | H    | -2.4557 | -0.2295 | -2.0063 |
| 40 | O    | -0.2056 | 0.1672  | -2.0154 |
| 41 | C    | 3.3349  | -3.3300 | -0.5470 |
| 42 | C    | 4.5030  | -4.0731 | -0.5811 |
| 43 | C    | 5.5994  | -3.6330 | -1.3400 |
| 44 | C    | 5.4917  | -2.4470 | -2.0796 |
| 45 | C    | 4.3118  | -1.7196 | -2.0511 |
| 46 | C    | -4.6452 | -0.8859 | 0.5633  |
| 47 | C    | -5.8977 | -1.4535 | 0.7501  |
| 48 | C    | -6.5384 | -2.1191 | -0.3048 |
| 49 | C    | -5.9060 | -2.1965 | -1.5531 |
| 50 | C    | -4.6561 | -1.6208 | -1.7307 |
| 51 | H    | -1.9012 | -2.5264 | 0.8284  |
| 52 | H    | -2.1919 | -1.0685 | 1.7424  |
| 53 | H    | 3.1741  | -1.1955 | 1.2607  |
| 54 | H    | 3.2112  | -1.7680 | 3.6511  |

|    |   |         |         |         |
|----|---|---------|---------|---------|
| 55 | H | 2.4954  | -3.6882 | 0.0341  |
| 56 | H | 4.5758  | -5.0010 | -0.0273 |
| 57 | H | 6.3301  | -2.1101 | -2.6768 |
| 58 | H | 4.2314  | -0.8110 | -2.6372 |
| 59 | H | -4.1799 | -0.3508 | 1.3818  |
| 60 | H | -6.3906 | -1.3791 | 1.7117  |
| 61 | H | -6.3978 | -2.7046 | -2.3734 |
| 62 | H | -4.1735 | -1.6893 | -2.6994 |
| 63 | C | 1.0759  | -2.0497 | 3.7770  |
| 64 | H | 1.0827  | -2.3093 | 4.8298  |
| 65 | C | -0.1258 | -1.9766 | 3.0842  |
| 66 | H | -1.0606 | -2.1633 | 3.6033  |
| 67 | C | -0.5142 | 1.6519  | 4.1375  |
| 68 | H | -1.5329 | 1.3273  | 4.3429  |
| 69 | H | 0.1832  | 0.8650  | 4.4363  |
| 70 | H | -0.3043 | 2.5606  | 4.7088  |
| 71 | H | 3.4269  | 3.7276  | -0.3137 |
| 72 | C | 6.8089  | -4.3937 | -1.3682 |
| 73 | N | 7.7879  | -5.0075 | -1.3890 |
| 74 | C | -7.8289 | -2.7041 | -0.1121 |
| 75 | N | -8.8719 | -3.1764 | 0.0433  |

Prod5h

|    | Atom | X       | Y       | Z       |
|----|------|---------|---------|---------|
| 1  | C    | -2.1431 | -0.4550 | -0.7044 |
| 2  | N    | -3.0598 | -1.3031 | 0.0388  |
| 3  | C    | -2.4418 | -2.6221 | 0.3328  |
| 4  | C    | -4.4383 | -1.4883 | -0.4541 |
| 5  | C    | -4.7514 | -2.9672 | -0.1588 |
| 6  | C    | -3.3829 | -3.6564 | -0.2983 |
| 7  | H    | -2.4387 | -2.7672 | 1.4205  |
| 8  | C    | -2.4401 | 1.0294  | -0.6095 |
| 9  | C    | -2.3750 | 1.5967  | -1.8908 |
| 10 | N    | -2.1451 | 0.5973  | -2.8504 |
| 11 | C    | -2.1841 | -0.6553 | -2.2728 |
| 12 | C    | -2.8309 | 1.8114  | 0.4619  |
| 13 | C    | -3.0803 | 3.1749  | 0.2632  |
| 14 | C    | -2.9506 | 3.7347  | -1.0040 |
| 15 | C    | -2.6065 | 2.9477  | -2.1086 |
| 16 | O    | -2.2746 | -1.7005 | -2.8796 |
| 17 | H    | -5.1303 | -0.8073 | 0.0492  |
| 18 | H    | -4.5077 | -1.3013 | -1.5323 |
| 19 | H    | -5.1291 | -3.0774 | 0.8628  |
| 20 | H    | -5.5068 | -3.3700 | -0.8363 |
| 21 | H    | -3.3400 | -4.6289 | 0.1968  |
| 22 | H    | -3.1342 | -3.7870 | -1.3542 |
| 23 | H    | -2.9550 | 1.3682  | 1.4415  |
| 24 | H    | -3.1394 | 4.7927  | -1.1470 |
| 25 | H    | -2.5484 | 3.3786  | -3.1004 |
| 26 | C    | 0.1152  | 0.8821  | 1.4511  |
| 27 | C    | -0.4619 | -0.5029 | 1.3083  |
| 28 | C    | -0.7269 | -0.9625 | -0.1458 |
| 29 | C    | 0.4610  | -0.5966 | -1.0606 |
| 30 | C    | 1.4561  | 0.4323  | -0.5795 |
| 31 | C    | 1.0420  | 1.3433  | 0.5027  |
| 32 | C    | 1.5097  | 2.6647  | 0.5914  |
| 33 | C    | 1.1394  | 3.4802  | 1.6506  |
| 34 | C    | 2.6604  | 0.3804  | -1.2007 |
| 35 | H    | 2.6897  | -0.2921 | -2.0545 |
| 36 | C    | 3.9377  | 1.0360  | -0.9056 |
| 37 | C    | -1.0076 | -2.5180 | -0.2097 |
| 38 | C    | 0.0330  | -3.4311 | 0.4066  |
| 39 | H    | -1.0438 | -2.7503 | -1.2733 |
| 40 | O    | 0.6217  | -1.1775 | -2.1163 |
| 41 | C    | 4.3801  | 1.3181  | 0.3995  |
| 42 | C    | 5.6270  | 1.8769  | 0.6240  |
| 43 | C    | 6.4704  | 2.1807  | -0.4567 |
| 44 | C    | 6.0514  | 1.8892  | -1.7619 |
| 45 | C    | 4.8097  | 1.3099  | -1.9742 |
| 46 | C    | 1.0424  | -3.9517 | -0.4182 |
| 47 | C    | 2.0228  | -4.7972 | 0.0814  |
| 48 | C    | 2.0141  | -5.1558 | 1.4364  |
| 49 | C    | 1.0084  | -4.6538 | 2.2719  |
| 50 | C    | 0.0360  | -3.8045 | 1.7585  |
| 51 | H    | 0.2460  | -1.2132 | 1.7496  |
| 52 | H    | -1.3830 | -0.5848 | 1.8876  |
| 53 | H    | 2.1664  | 3.0503  | -0.1780 |
| 54 | H    | 1.5103  | 4.4972  | 1.7048  |

|    |   |         |         |         |
|----|---|---------|---------|---------|
| 55 | H | 3.7454  | 1.0830  | 1.2433  |
| 56 | H | 5.9604  | 2.0791  | 1.6343  |
| 57 | H | 6.7051  | 2.1085  | -2.5969 |
| 58 | H | 4.4994  | 1.0703  | -2.9851 |
| 59 | H | 1.0536  | -3.6807 | -1.4670 |
| 60 | H | 2.7930  | -5.1889 | -0.5716 |
| 61 | H | 0.9922  | -4.9344 | 3.3179  |
| 62 | H | -0.7334 | -3.4400 | 2.4272  |
| 63 | C | 0.2871  | 2.9882  | 2.6405  |
| 64 | H | 0.0064  | 3.6143  | 3.4798  |
| 65 | C | -0.2289 | 1.7031  | 2.5274  |
| 66 | H | -0.9224 | 1.3325  | 3.2754  |
| 67 | C | -2.1667 | 0.8030  | -4.2855 |
| 68 | H | -3.1147 | 1.2473  | -4.6059 |
| 69 | H | -1.3453 | 1.4558  | -4.5911 |
| 70 | H | -2.0497 | -0.1717 | -4.7562 |
| 71 | H | -3.3781 | 3.7952  | 1.1000  |
| 72 | C | 3.0170  | -6.0305 | 1.9608  |
| 73 | N | 3.8273  | -6.7356 | 2.3864  |
| 74 | C | 7.7515  | 2.7714  | -0.2261 |
| 75 | N | 8.7855  | 3.2523  | -0.0398 |

TS5h

|    | Atom | X       | Y       | Z       |
|----|------|---------|---------|---------|
| 1  | C    | -0.8740 | -0.6639 | 2.1321  |
| 2  | N    | -1.4135 | 0.5053  | 2.5328  |
| 3  | C    | -2.3622 | 1.1974  | 1.8322  |
| 4  | C    | -0.9192 | 1.2887  | 3.7146  |
| 5  | C    | -1.5714 | 2.6607  | 3.5335  |
| 6  | C    | -2.8073 | 2.3805  | 2.6581  |
| 7  | H    | -3.0952 | 0.6198  | 1.2911  |
| 8  | C    | -1.4750 | -1.7348 | 1.3633  |
| 9  | C    | -0.5600 | -2.8233 | 1.4136  |
| 10 | N    | 0.5477  | -2.4695 | 2.1699  |
| 11 | C    | 0.4082  | -1.1846 | 2.6897  |
| 12 | C    | -2.6915 | -1.9245 | 0.6987  |
| 13 | C    | -2.9719 | -3.1549 | 0.0976  |
| 14 | C    | -2.0478 | -4.1965 | 0.1436  |
| 15 | C    | -0.8283 | -4.0411 | 0.8094  |
| 16 | O    | 1.2092  | -0.6503 | 3.4381  |
| 17 | H    | -1.2763 | 0.7676  | 4.6085  |
| 18 | H    | 0.1632  | 1.3038  | 3.7210  |
| 19 | H    | -1.8276 | 3.1168  | 4.4903  |
| 20 | H    | -0.8759 | 3.3186  | 3.0120  |
| 21 | H    | -3.6770 | 2.1061  | 3.2678  |
| 22 | H    | -3.1045 | 3.2289  | 2.0392  |
| 23 | H    | -3.4414 | -1.1468 | 0.6577  |
| 24 | H    | -2.2761 | -5.1416 | -0.3350 |
| 25 | H    | -0.1154 | -4.8547 | 0.8564  |
| 26 | C    | 0.7561  | -0.8871 | -1.4816 |
| 27 | C    | -0.4243 | 0.0452  | -1.3473 |
| 28 | C    | -0.3618 | 1.0043  | -0.1916 |
| 29 | C    | 0.8975  | 1.2611  | 0.4988  |
| 30 | C    | 2.1421  | 0.6089  | -0.0496 |
| 31 | C    | 1.9795  | -0.6252 | -0.8414 |
| 32 | C    | 2.9973  | -1.5957 | -0.9156 |
| 33 | C    | 2.8399  | -2.7489 | -1.6688 |
| 34 | C    | 3.2929  | 1.2558  | 0.2545  |
| 35 | H    | 3.1632  | 2.0544  | 0.9806  |
| 36 | C    | 4.6632  | 1.1023  | -0.2449 |
| 37 | C    | -1.4090 | 1.8915  | 0.1574  |
| 38 | C    | -2.5393 | 2.2538  | -0.7401 |
| 39 | H    | -1.0177 | 2.7531  | 0.6895  |
| 40 | O    | 0.9697  | 2.0706  | 1.4318  |
| 41 | C    | 4.9650  | 0.8069  | -1.5869 |
| 42 | C    | 6.2762  | 0.7421  | -2.0279 |
| 43 | C    | 7.3346  | 0.9682  | -1.1333 |
| 44 | C    | 7.0504  | 1.2814  | 0.2033  |
| 45 | C    | 5.7336  | 1.3602  | 0.6302  |
| 46 | C    | -2.8034 | 3.6193  | -0.9470 |
| 47 | C    | -3.8410 | 4.0463  | -1.7625 |
| 48 | C    | -4.6642 | 3.1058  | -2.3967 |
| 49 | C    | -4.4236 | 1.7400  | -2.1949 |
| 50 | C    | -3.3796 | 1.3267  | -1.3791 |
| 51 | H    | -0.5549 | 0.6098  | -2.2839 |
| 52 | H    | -1.3162 | -0.5842 | -1.2671 |
| 53 | H    | 3.9175  | -1.4398 | -0.3690 |
| 54 | H    | 3.6426  | -3.4763 | -1.7158 |

|    |   |         |         |         |
|----|---|---------|---------|---------|
| 55 | H | 4.1595  | 0.6405  | -2.2904 |
| 56 | H | 6.4930  | 0.5226  | -3.0661 |
| 57 | H | 7.8632  | 1.4687  | 0.8942  |
| 58 | H | 5.5209  | 1.6163  | 1.6620  |
| 59 | H | -2.1696 | 4.3571  | -0.4681 |
| 60 | H | -4.0197 | 5.1038  | -1.9133 |
| 61 | H | -5.0596 | 1.0089  | -2.6786 |
| 62 | H | -3.2260 | 0.2656  | -1.2369 |
| 63 | C | 1.6455  | -2.9712 | -2.3575 |
| 64 | H | 1.5142  | -3.8670 | -2.9538 |
| 65 | C | 0.6131  | -2.0509 | -2.2448 |
| 66 | H | -0.3334 | -2.2409 | -2.7405 |
| 67 | C | 1.6907  | -3.3133 | 2.4519  |
| 68 | H | 1.3854  | -4.2230 | 2.9776  |
| 69 | H | 2.2071  | -3.5848 | 1.5277  |
| 70 | H | 2.3647  | -2.7413 | 3.0877  |
| 71 | H | -3.9202 | -3.2963 | -0.4072 |
| 72 | C | 8.6884  | 0.8919  | -1.5849 |
| 73 | N | 9.7829  | 0.8273  | -1.9503 |
| 74 | C | -5.7403 | 3.5331  | -3.2354 |
| 75 | N | -6.6115 | 3.8768  | -3.9120 |



Prod4i

|    | Atom | X       | Y       | Z       |
|----|------|---------|---------|---------|
| 1  | C    | -1.3788 | 1.6343  | 0.2805  |
| 2  | N    | -2.3865 | 2.2273  | -0.5976 |
| 3  | C    | -3.4377 | 1.2146  | -0.8071 |
| 4  | C    | -2.0330 | 2.7930  | -1.9147 |
| 5  | C    | -3.4107 | 2.9116  | -2.5693 |
| 6  | C    | -4.1397 | 1.6243  | -2.1223 |
| 7  | H    | -4.1244 | 1.2371  | 0.0383  |
| 8  | C    | -0.0622 | 2.4049  | 0.2903  |
| 9  | C    | 0.0623  | 3.0850  | 1.5168  |
| 10 | N    | -1.0320 | 2.8075  | 2.3184  |
| 11 | C    | -1.9220 | 1.9368  | 1.7204  |
| 12 | C    | 0.9229  | 2.5619  | -0.6672 |
| 13 | C    | 2.0168  | 3.3796  | -0.3651 |
| 14 | C    | 2.1411  | 4.0445  | 0.8507  |
| 15 | C    | 1.1491  | 3.9011  | 1.8135  |
| 16 | O    | -2.9452 | 1.5413  | 2.2305  |
| 17 | H    | -1.1896 | 3.1750  | 3.2448  |
| 18 | N    | 3.0764  | 3.5417  | -1.3723 |
| 19 | O    | 2.9512  | 2.9431  | -2.4344 |
| 20 | O    | 4.0254  | 4.2655  | -1.0914 |
| 21 | H    | -1.5358 | 3.7571  | -1.7982 |
| 22 | H    | -1.3860 | 2.1325  | -2.5060 |
| 23 | H    | -3.9260 | 3.7927  | -2.1785 |
| 24 | H    | -3.3459 | 3.0093  | -3.6547 |
| 25 | H    | -5.2091 | 1.7874  | -1.9807 |
| 26 | H    | -4.0300 | 0.8348  | -2.8699 |
| 27 | H    | 0.8849  | 2.0763  | -1.6306 |
| 28 | H    | 3.0104  | 4.6629  | 1.0242  |
| 29 | H    | 1.2248  | 4.4114  | 2.7658  |
| 30 | C    | 0.0274  | -0.6534 | 1.9723  |
| 31 | C    | -1.2779 | -0.8463 | 1.2485  |
| 32 | C    | -1.3716 | 0.0400  | -0.0167 |
| 33 | C    | -0.1527 | -0.2880 | -0.9150 |
| 34 | C    | 1.0885  | -0.8269 | -0.2516 |
| 35 | C    | 1.2078  | -0.6481 | 1.2087  |
| 36 | C    | 2.4310  | -0.3904 | 1.8453  |
| 37 | C    | 2.4873  | -0.2028 | 3.2210  |
| 38 | C    | 1.9785  | -1.4119 | -1.0944 |
| 39 | H    | 1.7352  | -1.2867 | -2.1463 |
| 40 | C    | -2.6964 | -0.1551 | -0.8510 |
| 41 | H    | -2.3612 | -0.2914 | -1.8794 |
| 42 | O    | -0.2037 | -0.1251 | -2.1220 |
| 43 | H    | -1.3676 | -1.8893 | 0.9238  |
| 44 | H    | -2.1155 | -0.6583 | 1.9147  |
| 45 | H    | 3.3380  | -0.3298 | 1.2573  |
| 46 | H    | 3.4409  | -0.0071 | 3.6983  |
| 47 | C    | 1.3196  | -0.2570 | 3.9824  |
| 48 | H    | 1.3619  | -0.1182 | 5.0570  |
| 49 | C    | 0.0955  | -0.4701 | 3.3543  |
| 50 | H    | -0.8201 | -0.4869 | 3.9361  |
| 51 | C    | 3.1805  | -2.2055 | -0.8454 |
| 52 | C    | 4.1574  | -2.2378 | -1.8290 |
| 53 | C    | 3.3640  | -3.0120 | 0.3189  |
| 54 | C    | 5.3440  | -2.9950 | -1.6840 |

|    |   |         |         |         |
|----|---|---------|---------|---------|
| 55 | H | 4.0205  | -1.6548 | -2.7344 |
| 56 | C | 4.4887  | -3.7756 | 0.4748  |
| 57 | H | 2.5907  | -3.0341 | 1.0748  |
| 58 | C | 6.3607  | -3.0049 | -2.6749 |
| 59 | C | 5.5193  | -3.7845 | -0.5047 |
| 60 | H | 4.6036  | -4.3959 | 1.3577  |
| 61 | C | 7.4971  | -3.7584 | -2.5063 |
| 62 | H | 6.2265  | -2.4042 | -3.5682 |
| 63 | C | 6.7008  | -4.5525 | -0.3630 |
| 64 | C | 7.6687  | -4.5394 | -1.3401 |
| 65 | H | 8.2683  | -3.7571 | -3.2681 |
| 66 | H | 6.8315  | -5.1532 | 0.5310  |
| 67 | H | 8.5697  | -5.1302 | -1.2198 |
| 68 | C | -3.5695 | -1.3431 | -0.5034 |
| 69 | C | -3.5895 | -2.4460 | -1.3320 |
| 70 | C | -4.4069 | -1.3494 | 0.6493  |
| 71 | C | -4.4063 | -3.5755 | -1.0660 |
| 72 | H | -2.9655 | -2.4593 | -2.2208 |
| 73 | C | -5.2106 | -2.4241 | 0.9358  |
| 74 | H | -4.4036 | -0.4934 | 1.3139  |
| 75 | C | -4.4281 | -4.7124 | -1.9155 |
| 76 | C | -5.2389 | -3.5673 | 0.0956  |
| 77 | H | -5.8414 | -2.4092 | 1.8189  |
| 78 | C | -5.2324 | -5.7890 | -1.6297 |
| 79 | H | -3.7963 | -4.7181 | -2.7978 |
| 80 | C | -6.0585 | -4.6941 | 0.3621  |
| 81 | C | -6.0559 | -5.7802 | -0.4796 |
| 82 | H | -5.2393 | -6.6518 | -2.2864 |
| 83 | H | -6.6900 | -4.6845 | 1.2445  |
| 84 | H | -6.6864 | -6.6360 | -0.2658 |

TS4i

|    | Atom | X       | Y       | Z       |
|----|------|---------|---------|---------|
| 1  | C    | 1.2521  | -2.2882 | -0.1622 |
| 2  | N    | 2.0545  | -1.9666 | -1.2052 |
| 3  | C    | 3.1837  | -1.2090 | -1.0730 |
| 4  | C    | 1.7363  | -2.2616 | -2.6307 |
| 5  | C    | 2.7910  | -1.4681 | -3.4136 |
| 6  | C    | 3.9148  | -1.2075 | -2.3928 |
| 7  | H    | 3.7111  | -1.3247 | -0.1378 |
| 8  | C    | -0.0519 | -2.9173 | -0.1825 |
| 9  | C    | -0.3622 | -3.2473 | 1.1692  |
| 10 | N    | 0.6978  | -2.8856 | 1.9676  |
| 11 | C    | 1.7289  | -2.2942 | 1.2335  |
| 12 | C    | -0.9968 | -3.1943 | -1.1676 |
| 13 | C    | -2.1936 | -3.7992 | -0.7857 |
| 14 | C    | -2.4902 | -4.1255 | 0.5377  |
| 15 | C    | -1.5632 | -3.8432 | 1.5341  |
| 16 | O    | 2.7899  | -1.9204 | 1.7245  |
| 17 | H    | 0.7137  | -2.9089 | 2.9751  |
| 18 | N    | -3.1867 | -4.1004 | -1.8270 |
| 19 | O    | -2.9043 | -3.8193 | -2.9875 |
| 20 | O    | -4.2426 | -4.6174 | -1.4794 |
| 21 | H    | 1.8195  | -3.3431 | -2.7748 |
| 22 | H    | 0.7307  | -1.9303 | -2.8627 |
| 23 | H    | 3.1360  | -2.0117 | -4.2934 |
| 24 | H    | 2.3549  | -0.5255 | -3.7461 |
| 25 | H    | 4.6595  | -2.0124 | -2.3995 |
| 26 | H    | 4.4499  | -0.2730 | -2.5673 |
| 27 | H    | -0.8532 | -2.9636 | -2.2098 |
| 28 | H    | -3.4383 | -4.5915 | 0.7637  |
| 29 | H    | -1.7751 | -4.0796 | 2.5695  |
| 30 | C    | 0.1199  | 0.5701  | 2.3116  |
| 31 | C    | 1.3916  | 0.9419  | 1.5901  |
| 32 | C    | 1.4050  | 0.6125  | 0.1236  |
| 33 | C    | 0.1533  | 0.4340  | -0.6067 |
| 34 | C    | -1.1269 | 0.6471  | 0.1551  |
| 35 | C    | -1.0921 | 0.4233  | 1.6144  |
| 36 | C    | -2.2219 | -0.0317 | 2.3192  |
| 37 | C    | -2.1720 | -0.2635 | 3.6860  |
| 38 | C    | -2.1873 | 1.0173  | -0.6050 |
| 39 | H    | -1.9958 | 0.9614  | -1.6736 |
| 40 | C    | 2.5694  | 0.6797  | -0.6733 |
| 41 | H    | 2.3211  | 0.8769  | -1.7127 |
| 42 | O    | 0.1426  | 0.2024  | -1.8246 |
| 43 | H    | 1.5882  | 2.0190  | 1.7132  |
| 44 | H    | 2.2205  | 0.4373  | 2.0916  |
| 45 | H    | -3.1425 | -0.2143 | 1.7814  |
| 46 | H    | -3.0588 | -0.6083 | 4.2061  |
| 47 | C    | -0.9801 | -0.0596 | 4.3839  |
| 48 | H    | -0.9345 | -0.2290 | 5.4541  |
| 49 | C    | 0.1557  | 0.3418  | 3.6910  |
| 50 | H    | 1.0951  | 0.4692  | 4.2199  |
| 51 | C    | -3.5194 | 1.5158  | -0.2518 |
| 52 | C    | -4.5732 | 1.2674  | -1.1165 |
| 53 | C    | -3.7664 | 2.3251  | 0.8984  |
| 54 | C    | -5.8826 | 1.7423  | -0.8620 |

|    |   |         |        |         |
|----|---|---------|--------|---------|
| 55 | H | -4.3993 | 0.6803 | -2.0129 |
| 56 | C | -5.0162 | 2.8192 | 1.1590  |
| 57 | H | -2.9441 | 2.5661 | 1.5593  |
| 58 | C | -6.9710 | 1.4630 | -1.7299 |
| 59 | C | -6.1157 | 2.5371 | 0.3036  |
| 60 | H | -5.1802 | 3.4459 | 2.0297  |
| 61 | C | -8.2285 | 1.9448 | -1.4573 |
| 62 | H | -6.7938 | 0.8581 | -2.6130 |
| 63 | C | -7.4232 | 3.0216 | 0.5540  |
| 64 | C | -8.4572 | 2.7318 | -0.3050 |
| 65 | H | -9.0523 | 1.7226 | -2.1262 |
| 66 | H | -7.5970 | 3.6269 | 1.4378  |
| 67 | H | -9.4540 | 3.1067 | -0.1018 |
| 68 | C | 3.8333  | 1.3450 | -0.2388 |
| 69 | C | 4.3209  | 2.3910 | -1.0002 |
| 70 | C | 4.5759  | 0.9398 | 0.9083  |
| 71 | C | 5.5079  | 3.0849 | -0.6548 |
| 72 | H | 3.7761  | 2.7092 | -1.8840 |
| 73 | C | 5.7331  | 1.5855 | 1.2638  |
| 74 | H | 4.2338  | 0.0957 | 1.4946  |
| 75 | C | 6.0023  | 4.1706 | -1.4246 |
| 76 | C | 6.2336  | 2.6763 | 0.5069  |
| 77 | H | 6.2874  | 1.2582 | 2.1375  |
| 78 | C | 7.1576  | 4.8198 | -1.0628 |
| 79 | H | 5.4502  | 4.4823 | -2.3052 |
| 80 | C | 7.4237  | 3.3662 | 0.8520  |
| 81 | C | 7.8759  | 4.4138 | 0.0863  |
| 82 | H | 7.5242  | 5.6487 | -1.6578 |
| 83 | H | 7.9731  | 3.0529 | 1.7337  |
| 84 | H | 8.7862  | 4.9349 | 0.3604  |

Prod5i

|    | Atom | X       | Y       | Z       |
|----|------|---------|---------|---------|
| 1  | C    | -2.2302 | -0.4430 | -0.6446 |
| 2  | N    | -3.1513 | -1.2888 | 0.0883  |
| 3  | C    | -2.5285 | -2.6021 | 0.4028  |
| 4  | C    | -4.5268 | -1.4832 | -0.4096 |
| 5  | C    | -4.8328 | -2.9627 | -0.1077 |
| 6  | C    | -3.4590 | -3.6447 | -0.2295 |
| 7  | H    | -2.5381 | -2.7366 | 1.4910  |
| 8  | C    | -2.5324 | 1.0418  | -0.5451 |
| 9  | C    | -2.4592 | 1.6258  | -1.8222 |
| 10 | N    | -2.2074 | 0.6402  | -2.7702 |
| 11 | C    | -2.2643 | -0.6333 | -2.2164 |
| 12 | C    | -2.9252 | 1.8054  | 0.5317  |
| 13 | C    | -3.1565 | 3.1689  | 0.3246  |
| 14 | C    | -3.0306 | 3.7622  | -0.9288 |
| 15 | C    | -2.6866 | 2.9832  | -2.0292 |
| 16 | O    | -2.3811 | -1.6547 | -2.8449 |
| 17 | H    | -2.2738 | 0.7751  | -3.7690 |
| 18 | N    | -3.5425 | 4.0021  | 1.4693  |
| 19 | O    | -3.6206 | 3.4613  | 2.5687  |
| 20 | O    | -3.7616 | 5.1911  | 1.2672  |
| 21 | H    | -5.2253 | -0.8047 | 0.0885  |
| 22 | H    | -4.5942 | -1.3021 | -1.4891 |
| 23 | H    | -5.2189 | -3.0675 | 0.9112  |
| 24 | H    | -5.5802 | -3.3738 | -0.7890 |
| 25 | H    | -3.4149 | -4.6129 | 0.2734  |
| 26 | H    | -3.1996 | -3.7838 | -1.2821 |
| 27 | H    | -3.0664 | 1.3801  | 1.5133  |
| 28 | H    | -3.2193 | 4.8218  | -1.0275 |
| 29 | H    | -2.6179 | 3.4223  | -3.0170 |
| 30 | C    | 0.0107  | 0.9371  | 1.4848  |
| 31 | C    | -0.5530 | -0.4561 | 1.3716  |
| 32 | C    | -0.8154 | -0.9390 | -0.0755 |
| 33 | C    | 0.3774  | -0.5844 | -0.9948 |
| 34 | C    | 1.3848  | 0.4215  | -0.5105 |
| 35 | C    | 0.9605  | 1.3635  | 0.5420  |
| 36 | C    | 1.4244  | 2.6881  | 0.5938  |
| 37 | C    | 1.0190  | 3.5445  | 1.6086  |
| 38 | C    | 2.5997  | 0.3391  | -1.1135 |
| 39 | H    | 2.6223  | -0.3439 | -1.9587 |
| 40 | C    | -1.0889 | -2.4953 | -0.1231 |
| 41 | H    | -1.1097 | -2.7408 | -1.1842 |
| 42 | O    | 0.5142  | -1.1615 | -2.0574 |
| 43 | H    | 0.1671  | -1.1528 | 1.8140  |
| 44 | H    | -1.4676 | -0.5423 | 1.9607  |
| 45 | H    | 2.1054  | 3.0436  | -0.1692 |
| 46 | H    | 1.3863  | 4.5641  | 1.6332  |
| 47 | C    | 0.1349  | 3.0925  | 2.5889  |
| 48 | H    | -0.1838 | 3.7523  | 3.3874  |
| 49 | C    | -0.3703 | 1.7991  | 2.5153  |
| 50 | H    | -1.0896 | 1.4626  | 3.2543  |
| 51 | C    | -0.0535 | -3.4000 | 0.5181  |
| 52 | C    | 0.9247  | -3.9638 | -0.2774 |
| 53 | C    | -0.0500 | -3.7145 | 1.9067  |
| 54 | C    | 1.9227  | -4.8222 | 0.2485  |

|    |   |         |         |         |
|----|---|---------|---------|---------|
| 55 | H | 0.9382  | -3.7413 | -1.3390 |
| 56 | C | 0.8990  | -4.5459 | 2.4492  |
| 57 | H | -0.8130 | -3.3015 | 2.5551  |
| 58 | C | 2.9302  | -5.3991 | -0.5693 |
| 59 | C | 1.9140  | -5.1233 | 1.6456  |
| 60 | H | 0.8775  | -4.7742 | 3.5100  |
| 61 | C | 3.8818  | -6.2303 | -0.0309 |
| 62 | H | 2.9359  | -5.1704 | -1.6298 |
| 63 | C | 2.9103  | -5.9865 | 2.1708  |
| 64 | C | 3.8722  | -6.5272 | 1.3527  |
| 65 | H | 4.6467  | -6.6638 | -0.6655 |
| 66 | H | 2.9004  | -6.2132 | 3.2319  |
| 67 | H | 4.6294  | -7.1851 | 1.7642  |
| 68 | C | 3.8884  | 0.9614  | -0.8140 |
| 69 | C | 4.8076  | 1.0884  | -1.8446 |
| 70 | C | 4.2848  | 1.3635  | 0.4980  |
| 71 | C | 6.0890  | 1.6546  | -1.6447 |
| 72 | H | 4.5384  | 0.7537  | -2.8417 |
| 73 | C | 5.5265  | 1.8907  | 0.7272  |
| 74 | H | 3.5993  | 1.2274  | 1.3232  |
| 75 | C | 7.0205  | 1.8138  | -2.7044 |
| 76 | C | 6.4619  | 2.0701  | -0.3283 |
| 77 | H | 5.8157  | 2.1752  | 1.7336  |
| 78 | C | 8.2593  | 2.3613  | -2.4737 |
| 79 | H | 6.7370  | 1.4967  | -3.7025 |
| 80 | C | 7.7474  | 2.6281  | -0.1235 |
| 81 | C | 8.6262  | 2.7725  | -1.1716 |
| 82 | H | 8.9622  | 2.4797  | -3.2905 |
| 83 | H | 8.0296  | 2.9408  | 0.8764  |
| 84 | H | 9.6072  | 3.2020  | -1.0026 |

TS5i

|    | Atom | X       | Y       | Z       |
|----|------|---------|---------|---------|
| 1  | C    | -2.2528 | -0.3296 | 1.2525  |
| 2  | N    | -2.2809 | 0.8839  | 1.8481  |
| 3  | C    | -2.3220 | 2.0725  | 1.1667  |
| 4  | C    | -2.0844 | 1.0910  | 3.3200  |
| 5  | C    | -1.8131 | 2.5924  | 3.4349  |
| 6  | C    | -2.4643 | 3.1911  | 2.1745  |
| 7  | H    | -2.9253 | 2.1024  | 0.2721  |
| 8  | C    | -2.8626 | -0.7502 | 0.0069  |
| 9  | C    | -2.7187 | -2.1699 | -0.0614 |
| 10 | N    | -2.0727 | -2.6029 | 1.0705  |
| 11 | C    | -1.7883 | -1.5538 | 1.9544  |
| 12 | C    | -3.5463 | -0.1098 | -1.0217 |
| 13 | C    | -4.0383 | -0.8774 | -2.0808 |
| 14 | C    | -3.8851 | -2.2605 | -2.1453 |
| 15 | C    | -3.2185 | -2.9199 | -1.1174 |
| 16 | O    | -1.2672 | -1.6990 | 3.0431  |
| 17 | H    | -1.8084 | -3.5531 | 1.2774  |
| 18 | N    | -4.7281 | -0.1869 | -3.1760 |
| 19 | O    | -4.7592 | 1.0427  | -3.1494 |
| 20 | O    | -5.2310 | -0.8679 | -4.0616 |
| 21 | H    | -3.0183 | 0.7951  | 3.8093  |
| 22 | H    | -1.2795 | 0.4616  | 3.6786  |
| 23 | H    | -2.2195 | 3.0085  | 4.3574  |
| 24 | H    | -0.7360 | 2.7613  | 3.4243  |
| 25 | H    | -3.5263 | 3.4104  | 2.3373  |
| 26 | H    | -1.9926 | 4.1134  | 1.8326  |
| 27 | H    | -3.7359 | 0.9508  | -1.0421 |
| 28 | H    | -4.2864 | -2.7962 | -2.9934 |
| 29 | H    | -3.0912 | -3.9950 | -1.1436 |
| 30 | C    | 0.3895  | -0.9928 | -1.6065 |
| 31 | C    | -0.0263 | 0.4540  | -1.4952 |
| 32 | C    | -0.0605 | 1.0035  | -0.0977 |
| 33 | C    | 0.6887  | 0.3510  | 0.9742  |
| 34 | C    | 1.5159  | -0.8541 | 0.6142  |
| 35 | C    | 1.1184  | -1.6221 | -0.5819 |
| 36 | C    | 1.3755  | -3.0017 | -0.6932 |
| 37 | C    | 0.9981  | -3.7163 | -1.8205 |
| 38 | C    | 2.5499  | -1.1021 | 1.4558  |
| 39 | H    | 2.5334  | -0.4873 | 2.3519  |
| 40 | C    | -0.5765 | 2.2827  | 0.2320  |
| 41 | H    | -0.0841 | 2.6669  | 1.1209  |
| 42 | O    | 0.7208  | 0.8302  | 2.1149  |
| 43 | H    | 0.6447  | 1.0803  | -2.1048 |
| 44 | H    | -1.0067 | 0.5548  | -1.9692 |
| 45 | H    | 1.8743  | -3.5129 | 0.1193  |
| 46 | H    | 1.2168  | -4.7765 | -1.8846 |
| 47 | C    | 0.3359  | -3.0693 | -2.8653 |
| 48 | H    | 0.0442  | -3.6170 | -3.7543 |
| 49 | C    | 0.0244  | -1.7216 | -2.7427 |
| 50 | H    | -0.5268 | -1.2225 | -3.5333 |
| 51 | C    | -0.8439 | 3.3583  | -0.7711 |
| 52 | C    | -0.2210 | 4.5810  | -0.5954 |
| 53 | C    | -1.7240 | 3.2109  | -1.8816 |
| 54 | C    | -0.4120 | 5.6628  | -1.4910 |

|    |   |         |         |         |
|----|---|---------|---------|---------|
| 55 | H | 0.4504  | 4.7219  | 0.2462  |
| 56 | C | -1.9416 | 4.2413  | -2.7613 |
| 57 | H | -2.2480 | 2.2785  | -2.0453 |
| 58 | C | 0.2402  | 6.9124  | -1.3192 |
| 59 | C | -1.2945 | 5.4931  | -2.6025 |
| 60 | H | -2.6241 | 4.1017  | -3.5929 |
| 61 | C | 0.0284  | 7.9420  | -2.2032 |
| 62 | H | 0.9122  | 7.0411  | -0.4770 |
| 63 | C | -1.4933 | 6.5766  | -3.4959 |
| 64 | C | -0.8470 | 7.7734  | -3.3020 |
| 65 | H | 0.5333  | 8.8911  | -2.0625 |
| 66 | H | -2.1652 | 6.4442  | -4.3375 |
| 67 | H | -1.0049 | 8.5950  | -3.9914 |
| 68 | C | 3.6981  | -2.0080 | 1.3597  |
| 69 | C | 4.2493  | -2.5117 | 2.5268  |
| 70 | C | 4.3382  | -2.3211 | 0.1221  |
| 71 | C | 5.3814  | -3.3621 | 2.5183  |
| 72 | H | 3.7966  | -2.2587 | 3.4805  |
| 73 | C | 5.4477  | -3.1219 | 0.0827  |
| 74 | H | 3.9472  | -1.8981 | -0.7942 |
| 75 | C | 5.9313  | -3.9033 | 3.7103  |
| 76 | C | 5.9987  | -3.6799 | 1.2681  |
| 77 | H | 5.9288  | -3.3348 | -0.8665 |
| 78 | C | 7.0352  | -4.7204 | 3.6678  |
| 79 | H | 5.4630  | -3.6614 | 4.6586  |
| 80 | C | 7.1374  | -4.5227 | 1.2589  |
| 81 | C | 7.6445  | -5.0334 | 2.4307  |
| 82 | H | 7.4448  | -5.1286 | 4.5849  |
| 83 | H | 7.6055  | -4.7598 | 0.3090  |
| 84 | H | 8.5158  | -5.6782 | 2.4108  |



Prod4j

|    | Atom | X       | Y       | Z       |
|----|------|---------|---------|---------|
| 1  | C    | -1.3823 | 1.5842  | 0.2460  |
| 2  | N    | -2.4116 | 2.1488  | -0.6268 |
| 3  | C    | -3.4288 | 1.1016  | -0.8357 |
| 4  | C    | -2.0776 | 2.7207  | -1.9463 |
| 5  | C    | -3.4601 | 2.8009  | -2.5969 |
| 6  | C    | -4.1568 | 1.4984  | -2.1407 |
| 7  | H    | -4.1067 | 1.0913  | 0.0167  |
| 8  | C    | -0.0905 | 2.3961  | 0.2545  |
| 9  | C    | 0.0151  | 3.0775  | 1.4821  |
| 10 | N    | -1.0679 | 2.7647  | 2.2851  |
| 11 | C    | -1.9313 | 1.8662  | 1.6881  |
| 12 | C    | 0.8872  | 2.5858  | -0.7047 |
| 13 | C    | 1.9554  | 3.4370  | -0.4032 |
| 14 | C    | 2.0616  | 4.1028  | 0.8138  |
| 15 | C    | 1.0767  | 3.9265  | 1.7783  |
| 16 | O    | -2.9396 | 1.4378  | 2.2007  |
| 17 | H    | -1.2338 | 3.1235  | 3.2134  |
| 18 | N    | 3.0070  | 3.6353  | -1.4123 |
| 19 | O    | 2.8948  | 3.0416  | -2.4785 |
| 20 | O    | 3.9370  | 4.3826  | -1.1288 |
| 21 | H    | -1.6059 | 3.6980  | -1.8339 |
| 22 | H    | -1.4145 | 2.0764  | -2.5377 |
| 23 | H    | -3.9958 | 3.6711  | -2.2093 |
| 24 | H    | -3.4009 | 2.8945  | -3.6831 |
| 25 | H    | -5.2269 | 1.6412  | -1.9834 |
| 26 | H    | -4.0434 | 0.7111  | -2.8900 |
| 27 | H    | 0.8624  | 2.1005  | -1.6686 |
| 28 | H    | 2.9115  | 4.7477  | 0.9868  |
| 29 | H    | 1.1383  | 4.4369  | 2.7315  |
| 30 | C    | 0.0744  | -0.6616 | 1.9420  |
| 31 | C    | -1.2169 | -0.8952 | 1.2053  |
| 32 | C    | -1.3255 | -0.0086 | -0.0581 |
| 33 | C    | -0.0903 | -0.2990 | -0.9465 |
| 34 | C    | 1.1603  | -0.8022 | -0.2726 |
| 35 | C    | 1.2612  | -0.6188 | 1.1898  |
| 36 | C    | 2.4690  | -0.3217 | 1.8381  |
| 37 | C    | 2.5057  | -0.1305 | 3.2138  |
| 38 | C    | 2.0691  | -1.3695 | -1.1065 |
| 39 | H    | 1.8256  | -1.2584 | -2.1603 |
| 40 | C    | 3.2925  | -2.1290 | -0.8510 |
| 41 | C    | -2.6387 | -0.2383 | -0.9016 |
| 42 | C    | -3.4654 | -1.4669 | -0.5819 |
| 43 | H    | -2.2934 | -0.3409 | -1.9310 |
| 44 | O    | -0.1360 | -0.1360 | -2.1537 |
| 45 | C    | 3.5030  | -2.9240 | 0.2901  |
| 46 | C    | 4.6644  | -3.6678 | 0.4333  |
| 47 | C    | 5.6721  | -3.6458 | -0.5411 |
| 48 | C    | 5.4582  | -2.8696 | -1.6833 |
| 49 | C    | 4.2861  | -2.1404 | -1.8443 |
| 50 | C    | -4.3209 | -1.5378 | 0.5269  |
| 51 | C    | -5.0763 | -2.6787 | 0.7769  |
| 52 | C    | -5.0143 | -3.7937 | -0.0662 |
| 53 | C    | -4.1619 | -3.7247 | -1.1701 |
| 54 | C    | -3.4055 | -2.5826 | -1.4238 |

|    |   |         |         |         |
|----|---|---------|---------|---------|
| 55 | H | -1.2698 | -1.9395 | 0.8770  |
| 56 | H | -2.0679 | -0.7362 | 1.8620  |
| 57 | H | 3.3798  | -0.2360 | 1.2592  |
| 58 | H | 3.4477  | 0.0966  | 3.7001  |
| 59 | H | 2.7414  | -2.9742 | 1.0573  |
| 60 | H | 4.7924  | -4.2852 | 1.3169  |
| 61 | H | 6.2122  | -2.8456 | -2.4632 |
| 62 | H | 4.1356  | -1.5600 | -2.7484 |
| 63 | H | -4.3912 | -0.6985 | 1.2097  |
| 64 | H | -5.7270 | -2.7034 | 1.6459  |
| 65 | H | -4.0891 | -4.5727 | -1.8440 |
| 66 | H | -2.7549 | -2.5568 | -2.2923 |
| 67 | C | 1.3330  | -0.2220 | 3.9645  |
| 68 | H | 1.3605  | -0.0810 | 5.0393  |
| 69 | C | 0.1230  | -0.4753 | 3.3248  |
| 70 | H | -0.7977 | -0.5202 | 3.8970  |
| 71 | C | 6.9466  | -4.4296 | -0.3535 |
| 72 | H | 7.4666  | -4.5794 | -1.3018 |
| 73 | H | 7.6332  | -3.9042 | 0.3196  |
| 74 | H | 6.7501  | -5.4108 | 0.0862  |
| 75 | C | -5.8620 | -5.0151 | 0.1958  |
| 76 | H | -5.9363 | -5.2272 | 1.2655  |
| 77 | H | -6.8819 | -4.8749 | -0.1791 |
| 78 | H | -5.4506 | -5.8990 | -0.2966 |

TS4j

|    | Atom | X       | Y       | Z       |
|----|------|---------|---------|---------|
| 1  | C    | -0.9455 | 2.0876  | 0.4698  |
| 2  | N    | -1.7983 | 2.2526  | -0.5703 |
| 3  | C    | -3.0219 | 1.6490  | -0.6351 |
| 4  | C    | -1.4570 | 2.9736  | -1.8285 |
| 5  | C    | -2.6248 | 2.6440  | -2.7682 |
| 6  | C    | -3.7620 | 2.1991  | -1.8294 |
| 7  | H    | -3.5155 | 1.4998  | 0.3136  |
| 8  | C    | 0.4357  | 2.5060  | 0.5843  |
| 9  | C    | 0.8087  | 2.2990  | 1.9449  |
| 10 | N    | -0.2825 | 1.8269  | 2.6358  |
| 11 | C    | -1.3991 | 1.6721  | 1.8095  |
| 12 | C    | 1.3977  | 2.9831  | -0.3027 |
| 13 | C    | 2.6752  | 3.2516  | 0.1872  |
| 14 | C    | 3.0343  | 3.0508  | 1.5201  |
| 15 | C    | 2.0891  | 2.5639  | 2.4152  |
| 16 | O    | -2.4973 | 1.2960  | 2.2088  |
| 17 | H    | -0.2815 | 1.4970  | 3.5881  |
| 18 | N    | 3.6872  | 3.7652  | -0.7470 |
| 19 | O    | 3.3487  | 3.9583  | -1.9105 |
| 20 | O    | 4.8145  | 3.9747  | -0.3126 |
| 21 | H    | -1.3835 | 4.0399  | -1.5942 |
| 22 | H    | -0.5130 | 2.6113  | -2.2192 |
| 23 | H    | -2.8978 | 3.4972  | -3.3896 |
| 24 | H    | -2.3339 | 1.8242  | -3.4259 |
| 25 | H    | -4.3811 | 3.0486  | -1.5167 |
| 26 | H    | -4.4298 | 1.4619  | -2.2771 |
| 27 | H    | 1.2077  | 3.1541  | -1.3490 |
| 28 | H    | 4.0436  | 3.2774  | 1.8318  |
| 29 | H    | 2.3470  | 2.3928  | 3.4530  |
| 30 | C    | -0.2229 | -1.5746 | 1.7593  |
| 31 | C    | -1.5424 | -1.4934 | 1.0321  |
| 32 | C    | -1.5164 | -0.6900 | -0.2374 |
| 33 | C    | -0.2566 | -0.4418 | -0.9336 |
| 34 | C    | 0.9832  | -1.0780 | -0.3652 |
| 35 | C    | 0.9924  | -1.3677 | 1.0842  |
| 36 | C    | 2.1821  | -1.3448 | 1.8354  |
| 37 | C    | 2.1764  | -1.5903 | 3.2004  |
| 38 | C    | 1.9671  | -1.3114 | -1.2683 |
| 39 | H    | 1.7729  | -0.8703 | -2.2429 |
| 40 | C    | 3.2150  | -2.0772 | -1.1882 |
| 41 | C    | -2.6845 | -0.3233 | -0.9411 |
| 42 | C    | -4.0263 | -0.9284 | -0.6896 |
| 43 | H    | -2.4749 | -0.1788 | -1.9978 |
| 44 | O    | -0.2210 | 0.1923  | -1.9982 |
| 45 | C    | 3.3635  | -3.2496 | -0.4266 |
| 46 | C    | 4.5507  | -3.9674 | -0.4462 |
| 47 | C    | 5.6451  | -3.5490 | -1.2149 |
| 48 | C    | 5.4941  | -2.3943 | -1.9870 |
| 49 | C    | 4.3000  | -1.6820 | -1.9872 |
| 50 | C    | -4.7040 | -0.8601 | 0.5370  |
| 51 | C    | -5.9552 | -1.4473 | 0.6940  |
| 52 | C    | -6.5833 | -2.1242 | -0.3568 |
| 53 | C    | -5.9160 | -2.1785 | -1.5831 |
| 54 | C    | -4.6670 | -1.5874 | -1.7484 |

|    |   |         |         |         |
|----|---|---------|---------|---------|
| 55 | H | -1.9064 | -2.5078 | 0.8033  |
| 56 | H | -2.2775 | -1.0708 | 1.7210  |
| 57 | H | 3.1166  | -1.1232 | 1.3380  |
| 58 | H | 3.1084  | -1.5717 | 3.7544  |
| 59 | H | 2.5335  | -3.6088 | 0.1686  |
| 60 | H | 4.6295  | -4.8770 | 0.1412  |
| 61 | H | 6.3174  | -2.0533 | -2.6064 |
| 62 | H | 4.2034  | -0.7984 | -2.6094 |
| 63 | H | -4.2636 | -0.3246 | 1.3697  |
| 64 | H | -6.4569 | -1.3711 | 1.6538  |
| 65 | H | -6.3797 | -2.6858 | -2.4233 |
| 66 | H | -4.1729 | -1.6460 | -2.7129 |
| 67 | C | 0.9718  | -1.8530 | 3.8564  |
| 68 | H | 0.9592  | -2.0562 | 4.9216  |
| 69 | C | -0.2152 | -1.8303 | 3.1349  |
| 70 | H | -1.1600 | -1.9986 | 3.6423  |
| 71 | C | -7.9256 | -2.7868 | -0.1653 |
| 72 | H | -8.5547 | -2.2215 | 0.5267  |
| 73 | H | -8.4627 | -2.8817 | -1.1116 |
| 74 | H | -7.8105 | -3.7946 | 0.2487  |
| 75 | C | 6.9430  | -4.3179 | -1.1991 |
| 76 | H | 7.5524  | -4.0899 | -2.0761 |
| 77 | H | 7.5366  | -4.0686 | -0.3123 |
| 78 | H | 6.7675  | -5.3966 | -1.1784 |

Prod5j

|    | Atom | X       | Y       | Z       |
|----|------|---------|---------|---------|
| 1  | C    | -2.1776 | -0.4492 | -0.7133 |
| 2  | N    | -3.0745 | -1.3156 | 0.0257  |
| 3  | C    | -2.4243 | -2.6202 | 0.3220  |
| 4  | C    | -4.4534 | -1.5300 | -0.4532 |
| 5  | C    | -4.7303 | -3.0159 | -0.1550 |
| 6  | C    | -3.3473 | -3.6743 | -0.3019 |
| 7  | H    | -2.4136 | -2.7608 | 1.4095  |
| 8  | C    | -2.4988 | 1.0305  | -0.5979 |
| 9  | C    | -2.4522 | 1.6248  | -1.8718 |
| 10 | N    | -2.2032 | 0.6499  | -2.8308 |
| 11 | C    | -2.2328 | -0.6285 | -2.2857 |
| 12 | C    | -2.8831 | 1.7818  | 0.4905  |
| 13 | C    | -3.1336 | 3.1441  | 0.2972  |
| 14 | C    | -3.0344 | 3.7479  | -0.9535 |
| 15 | C    | -2.6986 | 2.9811  | -2.0648 |
| 16 | O    | -2.3482 | -1.6464 | -2.9200 |
| 17 | H    | -2.2851 | 0.7912  | -3.8275 |
| 18 | N    | -3.5115 | 3.9641  | 1.4540  |
| 19 | O    | -3.5663 | 3.4145  | 2.5504  |
| 20 | O    | -3.7477 | 5.1520  | 1.2643  |
| 21 | H    | -5.1558 | -0.8661 | 0.0589  |
| 22 | H    | -4.5400 | -1.3444 | -1.5306 |
| 23 | H    | -5.0986 | -3.1327 | 0.8692  |
| 24 | H    | -5.4813 | -3.4357 | -0.8270 |
| 25 | H    | -3.2793 | -4.6445 | 0.1946  |
| 26 | H    | -3.1021 | -3.8031 | -1.3591 |
| 27 | H    | -3.0037 | 1.3481  | 1.4711  |
| 28 | H    | -3.2370 | 4.8059  | -1.0413 |
| 29 | H    | -2.6503 | 3.4282  | -3.0503 |
| 30 | C    | 0.0780  | 0.9368  | 1.4129  |
| 31 | C    | -0.4830 | -0.4563 | 1.2851  |
| 32 | C    | -0.7484 | -0.9250 | -0.1660 |
| 33 | C    | 0.4279  | -0.5402 | -1.0937 |
| 34 | C    | 1.4462  | 0.4449  | -0.5920 |
| 35 | C    | 1.0274  | 1.3742  | 0.4752  |
| 36 | C    | 1.4927  | 2.6972  | 0.5429  |
| 37 | C    | 1.0866  | 3.5423  | 1.5666  |
| 38 | C    | 2.6621  | 0.3542  | -1.1901 |
| 39 | H    | 2.6794  | -0.3205 | -2.0423 |
| 40 | C    | 3.9594  | 0.9558  | -0.8807 |
| 41 | C    | -0.9956 | -2.4870 | -0.2257 |
| 42 | C    | 0.0653  | -3.3786 | 0.3907  |
| 43 | H    | -1.0300 | -2.7222 | -1.2892 |
| 44 | O    | 0.5443  | -1.0805 | -2.1781 |
| 45 | C    | 4.3681  | 1.3331  | 0.4117  |
| 46 | C    | 5.6411  | 1.8335  | 0.6372  |
| 47 | C    | 6.5612  | 1.9937  | -0.4087 |
| 48 | C    | 6.1645  | 1.6039  | -1.6903 |
| 49 | C    | 4.8974  | 1.0799  | -1.9191 |
| 50 | C    | 1.0820  | -3.8866 | -0.4308 |
| 51 | C    | 2.0804  | -4.7091 | 0.0782  |
| 52 | C    | 2.1035  | -5.0702 | 1.4295  |
| 53 | C    | 1.0892  | -4.5716 | 2.2489  |
| 54 | C    | 0.0895  | -3.7430 | 1.7421  |

|    |   |         |         |         |
|----|---|---------|---------|---------|
| 55 | H | 0.2392  | -1.1571 | 1.7176  |
| 56 | H | -1.3958 | -0.5518 | 1.8756  |
| 57 | H | 2.1771  | 3.0594  | -0.2138 |
| 58 | H | 1.4545  | 4.5614  | 1.6033  |
| 59 | H | 3.6893  | 1.2133  | 1.2457  |
| 60 | H | 5.9328  | 2.1016  | 1.6478  |
| 61 | H | 6.8604  | 1.6977  | -2.5176 |
| 62 | H | 4.6217  | 0.7637  | -2.9197 |
| 63 | H | 1.0873  | -3.6236 | -1.4826 |
| 64 | H | 2.8530  | -5.0809 | -0.5878 |
| 65 | H | 1.0758  | -4.8347 | 3.3020  |
| 66 | H | -0.6785 | -3.3875 | 2.4188  |
| 67 | C | 0.2008  | 3.0799  | 2.5410  |
| 68 | H | -0.1183 | 3.7310  | 3.3465  |
| 69 | C | -0.3040 | 1.7876  | 2.4528  |
| 70 | H | -1.0236 | 1.4428  | 3.1876  |
| 71 | C | 7.9300  | 2.5723  | -0.1518 |
| 72 | H | 8.6076  | 2.3803  | -0.9860 |
| 73 | H | 7.8767  | 3.6575  | -0.0116 |
| 74 | H | 8.3767  | 2.1515  | 0.7530  |
| 75 | C | 3.1715  | -5.9892 | 1.9713  |
| 76 | H | 3.2365  | -5.9267 | 3.0596  |
| 77 | H | 2.9617  | -7.0328 | 1.7127  |
| 78 | H | 4.1539  | -5.7445 | 1.5590  |

TS5j

|    | Atom | X       | Y       | Z       |
|----|------|---------|---------|---------|
| 1  | C    | -0.8371 | -0.6717 | 2.1329  |
| 2  | N    | -1.4171 | 0.4798  | 2.5414  |
| 3  | C    | -2.3556 | 1.1652  | 1.8150  |
| 4  | C    | -0.9737 | 1.2496  | 3.7487  |
| 5  | C    | -1.6403 | 2.6146  | 3.5644  |
| 6  | C    | -2.8470 | 2.3248  | 2.6528  |
| 7  | H    | -3.0789 | 0.5772  | 1.2709  |
| 8  | C    | -1.3969 | -1.7413 | 1.3313  |
| 9  | C    | -0.4574 | -2.8170 | 1.3690  |
| 10 | N    | 0.6088  | -2.4443 | 2.1499  |
| 11 | C    | 0.4449  | -1.1648 | 2.6975  |
| 12 | C    | -2.5850 | -1.9323 | 0.6331  |
| 13 | C    | -2.7954 | -3.1535 | -0.0131 |
| 14 | C    | -1.8703 | -4.1945 | 0.0207  |
| 15 | C    | -0.6829 | -4.0267 | 0.7262  |
| 16 | O    | 1.2331  | -0.6423 | 3.4618  |
| 17 | H    | 1.4357  | -2.9920 | 2.3280  |
| 18 | N    | -4.0380 | -3.3318 | -0.7719 |
| 19 | O    | -4.7932 | -2.3658 | -0.8717 |
| 20 | O    | -4.2570 | -4.4291 | -1.2714 |
| 21 | H    | -1.3526 | 0.7129  | 4.6248  |
| 22 | H    | 0.1080  | 1.2816  | 3.7913  |
| 23 | H    | -1.9290 | 3.0571  | 4.5184  |
| 24 | H    | -0.9409 | 3.2879  | 3.0682  |
| 25 | H    | -3.7239 | 2.0164  | 3.2346  |
| 26 | H    | -3.1483 | 3.1753  | 2.0398  |
| 27 | H    | -3.3675 | -1.1937 | 0.5742  |
| 28 | H    | -2.0913 | -5.1133 | -0.5029 |
| 29 | H    | 0.0496  | -4.8232 | 0.7696  |
| 30 | C    | 0.7102  | -0.8444 | -1.4970 |
| 31 | C    | -0.4419 | 0.1230  | -1.3726 |
| 32 | C    | -0.3917 | 1.0268  | -0.1747 |
| 33 | C    | 0.8688  | 1.2595  | 0.5285  |
| 34 | C    | 2.1070  | 0.6051  | -0.0234 |
| 35 | C    | 1.9289  | -0.6168 | -0.8342 |
| 36 | C    | 2.9212  | -1.6132 | -0.8976 |
| 37 | C    | 2.7447  | -2.7589 | -1.6588 |
| 38 | C    | 3.2665  | 1.2302  | 0.2966  |
| 39 | H    | 3.1400  | 2.0212  | 1.0317  |
| 40 | C    | 4.6401  | 1.0687  | -0.1915 |
| 41 | C    | -1.4513 | 1.8913  | 0.2004  |
| 42 | C    | -2.5832 | 2.2628  | -0.7032 |
| 43 | H    | -1.0596 | 2.7502  | 0.7381  |
| 44 | O    | 0.9320  | 2.0466  | 1.4814  |
| 45 | C    | 4.9607  | 0.7426  | -1.5211 |
| 46 | C    | 6.2812  | 0.6758  | -1.9414 |
| 47 | C    | 7.3423  | 0.9216  | -1.0594 |
| 48 | C    | 7.0264  | 1.2636  | 0.2578  |
| 49 | C    | 5.7040  | 1.3515  | 0.6798  |
| 50 | C    | -2.8036 | 3.6255  | -0.9540 |
| 51 | C    | -3.8389 | 4.0544  | -1.7783 |
| 52 | C    | -4.7099 | 3.1415  | -2.3793 |
| 53 | C    | -4.5050 | 1.7834  | -2.1179 |
| 54 | C    | -3.4655 | 1.3508  | -1.3006 |

|    |   |         |         |         |
|----|---|---------|---------|---------|
| 55 | H | -0.5067 | 0.7434  | -2.2810 |
| 56 | H | -1.3663 | -0.4615 | -1.3702 |
| 57 | H | 3.8386  | -1.4798 | -0.3402 |
| 58 | H | 3.5292  | -3.5067 | -1.6968 |
| 59 | H | 4.1651  | 0.5598  | -2.2325 |
| 60 | H | 6.4956  | 0.4358  | -2.9783 |
| 61 | H | 7.8252  | 1.4774  | 0.9608  |
| 62 | H | 5.4854  | 1.6374  | 1.7033  |
| 63 | H | -2.1448 | 4.3595  | -0.5016 |
| 64 | H | -3.9738 | 5.1173  | -1.9522 |
| 65 | H | -5.1714 | 1.0458  | -2.5532 |
| 66 | H | -3.3653 | 0.2867  | -1.1281 |
| 67 | C | 1.5581  | -2.9464 | -2.3705 |
| 68 | H | 1.4140  | -3.8343 | -2.9757 |
| 69 | C | 0.5490  | -1.9983 | -2.2712 |
| 70 | H | -0.3919 | -2.1573 | -2.7884 |
| 71 | C | -5.8194 | 3.6011  | -3.2929 |
| 72 | H | -6.1373 | 4.6185  | -3.0544 |
| 73 | H | -5.4931 | 3.5963  | -4.3388 |
| 74 | H | -6.6913 | 2.9467  | -3.2215 |
| 75 | C | 8.7744  | 0.8137  | -1.5216 |
| 76 | H | 9.4557  | 1.3111  | -0.8282 |
| 77 | H | 9.0864  | -0.2339 | -1.5963 |
| 78 | H | 8.9093  | 1.2620  | -2.5096 |



Prod4p

|    | Atom | X       | Y       | Z       |
|----|------|---------|---------|---------|
| 1  | C    | -0.2832 | -0.3357 | 1.1696  |
| 2  | N    | -1.3000 | -1.3684 | 1.2813  |
| 3  | C    | -2.5036 | -0.7540 | 1.8542  |
| 4  | C    | -1.6512 | -2.3257 | 0.2081  |
| 5  | C    | -3.1658 | -2.1574 | 0.0046  |
| 6  | C    | -3.6596 | -1.6365 | 1.3644  |
| 7  | H    | -2.4421 | -0.7478 | 2.9425  |
| 8  | C    | 0.9382  | -0.6850 | 0.3150  |
| 9  | C    | 2.0552  | -0.8636 | 1.1560  |
| 10 | N    | 1.6915  | -0.6501 | 2.4745  |
| 11 | C    | 0.3626  | -0.3006 | 2.6080  |
| 12 | C    | 1.1089  | -0.8536 | -1.0484 |
| 13 | C    | 2.3798  | -1.1769 | -1.5320 |
| 14 | C    | 3.4766  | -1.3572 | -0.6962 |
| 15 | C    | 3.3176  | -1.1990 | 0.6750  |
| 16 | O    | -0.1752 | -0.0639 | 3.6651  |
| 17 | H    | 2.2955  | -0.7576 | 3.2762  |
| 18 | N    | 2.5637  | -1.3165 | -2.9848 |
| 19 | O    | 1.6125  | -1.0438 | -3.7101 |
| 20 | O    | 3.6581  | -1.6906 | -3.3883 |
| 21 | H    | -1.1014 | -2.1359 | -0.7105 |
| 22 | H    | -1.4100 | -3.3422 | 0.5404  |
| 23 | H    | -3.3449 | -1.4179 | -0.7780 |
| 24 | H    | -3.6498 | -3.0901 | -0.2921 |
| 25 | H    | -4.5994 | -1.0835 | 1.3041  |
| 26 | H    | -3.8093 | -2.4654 | 2.0626  |
| 27 | H    | 0.2986  | -0.7380 | -1.7501 |
| 28 | H    | 4.4339  | -1.6121 | -1.1285 |
| 29 | H    | 4.1562  | -1.3304 | 1.3479  |
| 30 | C    | -0.7705 | 3.5868  | 1.0727  |
| 31 | C    | -0.3423 | 2.2384  | 1.5906  |
| 32 | C    | -1.0502 | 1.0574  | 0.8849  |
| 33 | C    | -1.0958 | 1.2911  | -0.6383 |
| 34 | C    | -0.5809 | 2.5941  | -1.1753 |
| 35 | C    | -0.8424 | 3.7667  | -0.3183 |
| 36 | C    | -1.2758 | 4.9983  | -0.8310 |
| 37 | C    | -1.5795 | 6.0496  | 0.0249  |
| 38 | C    | 0.0276  | 2.5246  | -2.3855 |
| 39 | H    | -0.0424 | 1.5513  | -2.8637 |
| 40 | C    | 0.8080  | 3.4936  | -3.1544 |
| 41 | C    | -2.5387 | 0.7280  | 1.3409  |
| 42 | C    | -3.2262 | 1.6924  | 2.2853  |
| 43 | H    | -3.1296 | 0.7157  | 0.4245  |
| 44 | O    | -1.5277 | 0.4240  | -1.3796 |
| 45 | C    | 1.4039  | 4.6494  | -2.6151 |
| 46 | C    | 2.1750  | 5.4924  | -3.4023 |
| 47 | C    | 2.3530  | 5.1844  | -4.7452 |
| 48 | C    | 1.8015  | 4.0479  | -5.3153 |
| 49 | C    | 1.0449  | 3.2044  | -4.5116 |
| 50 | C    | -2.9164 | 1.7648  | 3.6516  |
| 51 | C    | -3.5870 | 2.6461  | 4.4960  |
| 52 | C    | -4.5795 | 3.4571  | 3.9682  |
| 53 | C    | -4.9228 | 3.4111  | 2.6271  |
| 54 | C    | -4.2412 | 2.5252  | 1.7976  |

|    |   |         |        |         |
|----|---|---------|--------|---------|
| 55 | F | -5.2345 | 4.3131 | 4.7867  |
| 56 | F | 3.0960  | 6.0097 | -5.5110 |
| 57 | H | 0.7378  | 2.1310 | 1.4179  |
| 58 | H | -0.4923 | 2.1845 | 2.6660  |
| 59 | H | -1.3822 | 5.1236 | -1.9017 |
| 60 | H | -1.9141 | 6.9968 | -0.3827 |
| 61 | H | 1.2752  | 4.8848 | -1.5679 |
| 62 | H | 2.6432  | 6.3786 | -2.9924 |
| 63 | H | 1.9780  | 3.8306 | -6.3611 |
| 64 | H | 0.6298  | 2.2982 | -4.9382 |
| 65 | H | -2.1394 | 1.1314 | 4.0614  |
| 66 | H | -3.3537 | 2.7054 | 5.5521  |
| 67 | H | -5.7066 | 4.0561 | 2.2500  |
| 68 | H | -4.5042 | 2.4842 | 0.7460  |
| 69 | C | -1.4694 | 5.8802 | 1.4057  |
| 70 | H | -1.7105 | 6.6972 | 2.0760  |
| 71 | C | -1.0750 | 4.6502 | 1.9228  |
| 72 | H | -1.0195 | 4.5055 | 2.9960  |

TS4p

|    | Atom | X       | Y       | Z       |
|----|------|---------|---------|---------|
| 1  | C    | -0.5458 | -2.0362 | 0.4027  |
| 2  | N    | -1.3638 | -2.3615 | -0.6254 |
| 3  | C    | -2.6863 | -1.9961 | -0.6823 |
| 4  | C    | -0.9172 | -3.0708 | -1.8559 |
| 5  | C    | -2.1455 | -3.0201 | -2.7732 |
| 6  | C    | -3.3252 | -2.7660 | -1.8174 |
| 7  | H    | -3.1749 | -1.9368 | 0.2801  |
| 8  | C    | 0.8866  | -2.1929 | 0.5039  |
| 9  | C    | 1.2396  | -1.8612 | 1.8458  |
| 10 | N    | 0.0917  | -1.5419 | 2.5343  |
| 11 | C    | -1.0457 | -1.6416 | 1.7286  |
| 12 | C    | 1.9071  | -2.5218 | -0.3861 |
| 13 | C    | 3.2193  | -2.5329 | 0.0845  |
| 14 | C    | 3.5562  | -2.2249 | 1.4016  |
| 15 | C    | 2.5519  | -1.8795 | 2.2994  |
| 16 | O    | -2.1848 | -1.4311 | 2.1372  |
| 17 | H    | 0.0311  | -1.2751 | 3.5043  |
| 18 | N    | 4.2959  | -2.8630 | -0.8609 |
| 19 | O    | 3.9895  | -3.0452 | -2.0356 |
| 20 | O    | 5.4390  | -2.9342 | -0.4262 |
| 21 | H    | -0.0668 | -2.5593 | -2.2926 |
| 22 | H    | -0.6382 | -4.0904 | -1.5720 |
| 23 | H    | -2.0369 | -2.1902 | -3.4724 |
| 24 | H    | -2.2583 | -3.9378 | -3.3509 |
| 25 | H    | -4.1476 | -2.2198 | -2.2801 |
| 26 | H    | -3.7364 | -3.7061 | -1.4318 |
| 27 | H    | 1.7354  | -2.7662 | -1.4211 |
| 28 | H    | 4.5945  | -2.2518 | 1.6987  |
| 29 | H    | 2.7923  | -1.6246 | 3.3243  |
| 30 | C    | -0.9865 | 2.6195  | 0.9063  |
| 31 | C    | -1.9480 | 1.4601  | 0.7865  |
| 32 | C    | -1.7557 | 0.6331  | -0.4496 |
| 33 | C    | -0.4627 | 0.5941  | -1.1250 |
| 34 | C    | 0.6534  | 1.4200  | -0.5419 |
| 35 | C    | 0.2606  | 2.6000  | 0.2570  |
| 36 | C    | 1.0538  | 3.7615  | 0.2958  |
| 37 | C    | 0.6631  | 4.8779  | 1.0196  |
| 38 | C    | 1.9024  | 0.9954  | -0.8593 |
| 39 | H    | 1.9066  | 0.2067  | -1.6063 |
| 40 | C    | 3.2380  | 1.3485  | -0.3717 |
| 41 | C    | -2.8046 | -0.0807 | -1.0879 |
| 42 | C    | -4.2456 | 0.2143  | -0.8229 |
| 43 | H    | -2.5844 | -0.2139 | -2.1443 |
| 44 | O    | -0.2838 | -0.1226 | -2.1225 |
| 45 | C    | 3.5041  | 1.8621  | 0.9112  |
| 46 | C    | 4.8036  | 2.1063  | 1.3344  |
| 47 | C    | 5.8558  | 1.8333  | 0.4701  |
| 48 | C    | 5.6449  | 1.3053  | -0.7935 |
| 49 | C    | 4.3387  | 1.0565  | -1.1987 |
| 50 | C    | -4.8295 | 0.1009  | 0.4485  |
| 51 | C    | -6.1770 | 0.3884  | 0.6479  |
| 52 | C    | -6.9447 | 0.7896  | -0.4344 |
| 53 | C    | -6.4091 | 0.9052  | -1.7077 |
| 54 | C    | -5.0617 | 0.6097  | -1.8926 |

|    |   |         |         |         |
|----|---|---------|---------|---------|
| 55 | F | -8.2531 | 1.0694  | -0.2446 |
| 56 | F | 7.1192  | 2.0758  | 0.8814  |
| 57 | H | -1.8964 | 0.8243  | 1.6855  |
| 58 | H | -2.9672 | 1.8568  | 0.7989  |
| 59 | H | 1.9798  | 3.7879  | -0.2631 |
| 60 | H | 1.2924  | 5.7607  | 1.0302  |
| 61 | H | 2.6855  | 2.0624  | 1.5891  |
| 62 | H | 5.0135  | 2.4973  | 2.3224  |
| 63 | H | 6.4903  | 1.0825  | -1.4320 |
| 64 | H | 4.1629  | 0.6241  | -2.1775 |
| 65 | H | -4.2308 | -0.2309 | 1.2889  |
| 66 | H | -6.6353 | 0.3001  | 1.6251  |
| 67 | H | -7.0405 | 1.2200  | -2.5291 |
| 68 | H | -4.6317 | 0.7029  | -2.8839 |
| 69 | C | -0.5465 | 4.8669  | 1.7154  |
| 70 | H | -0.8606 | 5.7346  | 2.2847  |
| 71 | C | -1.3651 | 3.7474  | 1.6411  |
| 72 | H | -2.3274 | 3.7491  | 2.1435  |

## Prod5p

|    | Atom | X       | Y       | Z       |
|----|------|---------|---------|---------|
| 1  | C    | -0.1431 | 0.6384  | 0.3950  |
| 2  | C    | -0.4540 | -0.4806 | 1.3568  |
| 3  | C    | -0.7090 | -1.8444 | 0.6708  |
| 4  | C    | 0.2501  | -2.0284 | -0.5363 |
| 5  | C    | 1.3160  | -0.9869 | -0.7407 |
| 6  | C    | 0.8117  | 0.3943  | -0.6069 |
| 7  | C    | 1.1347  | 1.4146  | -1.5132 |
| 8  | C    | 0.5498  | 2.6696  | -1.3963 |
| 9  | C    | 2.5391  | -1.4436 | -1.0915 |
| 10 | H    | 2.5879  | -2.5172 | -1.2537 |
| 11 | C    | 3.8215  | -0.7524 | -1.2514 |
| 12 | C    | -2.1755 | -2.1155 | 0.1298  |
| 13 | C    | -3.1406 | -0.9478 | 0.0793  |
| 14 | H    | -2.0352 | -2.4411 | -0.9000 |
| 15 | O    | 0.1290  | -2.9658 | -1.2957 |
| 16 | C    | 4.1409  | 0.4707  | -0.6342 |
| 17 | C    | 5.3925  | 1.0500  | -0.7924 |
| 18 | C    | 6.3382  | 0.4044  | -1.5781 |
| 19 | C    | 6.0734  | -0.8093 | -2.1925 |
| 20 | C    | 4.8207  | -1.3842 | -2.0131 |
| 21 | C    | -3.8255 | -0.4564 | 1.1994  |
| 22 | C    | -4.7147 | 0.6112  | 1.1003  |
| 23 | C    | -4.9235 | 1.1930  | -0.1398 |
| 24 | C    | -4.2758 | 0.7363  | -1.2762 |
| 25 | C    | -3.3922 | -0.3314 | -1.1545 |
| 26 | F    | -5.7862 | 2.2284  | -0.2441 |
| 27 | F    | 7.5534  | 0.9704  | -1.7367 |
| 28 | H    | 0.4075  | -0.5893 | 2.0262  |
| 29 | H    | -1.2955 | -0.2060 | 1.9905  |
| 30 | H    | 1.8356  | 1.2151  | -2.3146 |
| 31 | H    | 0.8062  | 3.4510  | -2.1028 |
| 32 | H    | 3.4072  | 0.9690  | -0.0150 |
| 33 | H    | 5.6472  | 1.9875  | -0.3140 |
| 34 | H    | 6.8403  | -1.2889 | -2.7876 |
| 35 | H    | 4.6053  | -2.3406 | -2.4765 |
| 36 | H    | -3.6831 | -0.9004 | 2.1761  |
| 37 | H    | -5.2460 | 0.9858  | 1.9664  |
| 38 | H    | -4.4662 | 1.2107  | -2.2307 |
| 39 | H    | -2.8826 | -0.6933 | -2.0408 |
| 40 | C    | -0.3778 | 2.9175  | -0.3838 |
| 41 | H    | -0.8403 | 3.8939  | -0.2957 |
| 42 | C    | -0.7247 | 1.9016  | 0.5019  |
| 43 | H    | -1.4613 | 2.0853  | 1.2764  |
| 44 | C    | -0.4925 | -3.0929 | 1.7156  |
| 45 | N    | -1.4933 | -4.0826 | 1.3776  |
| 46 | C    | -2.6869 | -3.3778 | 0.8940  |
| 47 | C    | -1.2307 | -5.2958 | 0.5571  |
| 48 | C    | -2.2757 | -5.2504 | -0.5689 |
| 49 | C    | -3.4177 | -4.4057 | 0.0198  |
| 50 | H    | -3.3249 | -3.0719 | 1.7275  |
| 51 | C    | -0.6378 | -2.6508 | 3.1818  |
| 52 | C    | 0.6015  | -2.7569 | 3.8342  |
| 53 | N    | 1.5436  | -3.2442 | 2.9415  |
| 54 | C    | 0.9930  | -3.6042 | 1.7212  |

|    |   |         |         |         |
|----|---|---------|---------|---------|
| 55 | C | -1.7386 | -2.2606 | 3.9159  |
| 56 | C | -1.5669 | -1.9381 | 5.2656  |
| 57 | C | -0.3318 | -2.0156 | 5.9005  |
| 58 | C | 0.7782  | -2.4396 | 5.1775  |
| 59 | O | 1.6057  | -4.1830 | 0.8589  |
| 60 | H | 2.4909  | -3.5047 | 3.1739  |
| 61 | N | -2.7395 | -1.4977 | 6.0360  |
| 62 | O | -3.8063 | -1.3903 | 5.4387  |
| 63 | O | -2.5849 | -1.2589 | 7.2270  |
| 64 | H | -0.2165 | -5.3078 | 0.1674  |
| 65 | H | -1.3712 | -6.1823 | 1.1865  |
| 66 | H | -1.8453 | -4.7588 | -1.4430 |
| 67 | H | -2.6042 | -6.2479 | -0.8679 |
| 68 | H | -4.0423 | -3.9263 | -0.7369 |
| 69 | H | -4.0700 | -5.0215 | 0.6459  |
| 70 | H | -2.7310 | -2.2050 | 3.4999  |
| 71 | H | -0.2587 | -1.7539 | 6.9466  |
| 72 | H | 1.7470  | -2.5283 | 5.6538  |

TS5p

|    | Atom | X       | Y       | Z       |
|----|------|---------|---------|---------|
| 1  | C    | -0.5036 | 1.7347  | -1.6864 |
| 2  | C    | 0.6937  | 1.0176  | -1.1027 |
| 3  | C    | 0.7777  | 1.1110  | 0.3927  |
| 4  | C    | -0.4394 | 1.2744  | 1.1843  |
| 5  | C    | -1.7463 | 1.3391  | 0.4352  |
| 6  | C    | -1.6857 | 1.8786  | -0.9396 |
| 7  | C    | -2.7373 | 2.6361  | -1.4851 |
| 8  | C    | -2.6469 | 3.1774  | -2.7591 |
| 9  | C    | -2.8336 | 0.9279  | 1.1300  |
| 10 | H    | -2.6346 | 0.7184  | 2.1770  |
| 11 | C    | -4.2127 | 0.6482  | 0.7139  |
| 12 | C    | 1.9968  | 1.1634  | 1.1300  |
| 13 | C    | 3.2942  | 1.5728  | 0.5022  |
| 14 | H    | 1.8245  | 1.6708  | 2.0761  |
| 15 | O    | -0.4007 | 1.3346  | 2.4200  |
| 16 | C    | -4.5647 | 0.1919  | -0.5696 |
| 17 | C    | -5.8796 | -0.1237 | -0.8876 |
| 18 | C    | -6.8589 | 0.0188  | 0.0862  |
| 19 | C    | -6.5565 | 0.4476  | 1.3689  |
| 20 | C    | -5.2335 | 0.7447  | 1.6762  |
| 21 | C    | 3.8922  | 0.8969  | -0.5721 |
| 22 | C    | 5.1041  | 1.3200  | -1.1119 |
| 23 | C    | 5.7246  | 2.4335  | -0.5687 |
| 24 | C    | 5.1728  | 3.1289  | 0.4963  |
| 25 | C    | 3.9643  | 2.6886  | 1.0264  |
| 26 | F    | 6.9003  | 2.8501  | -1.0859 |
| 27 | F    | -8.1393 | -0.2827 | -0.2233 |
| 28 | H    | 0.6750  | -0.0378 | -1.4216 |
| 29 | H    | 1.6002  | 1.4313  | -1.5510 |
| 30 | H    | -3.6260 | 2.8105  | -0.8927 |
| 31 | H    | -3.4702 | 3.7602  | -3.1567 |
| 32 | H    | -3.7989 | 0.0782  | -1.3256 |
| 33 | H    | -6.1551 | -0.4790 | -1.8730 |
| 34 | H    | -7.3450 | 0.5328  | 2.1062  |
| 35 | H    | -4.9807 | 1.0622  | 2.6815  |
| 36 | H    | 3.4237  | 0.0225  | -1.0067 |
| 37 | H    | 5.5655  | 0.7937  | -1.9379 |
| 38 | H    | 5.6859  | 3.9952  | 0.8949  |
| 39 | H    | 3.5237  | 3.2309  | 1.8557  |
| 40 | C    | -1.4906 | 2.9861  | -3.5163 |
| 41 | H    | -1.4110 | 3.4071  | -4.5122 |
| 42 | C    | -0.4258 | 2.2791  | -2.9712 |
| 43 | H    | 0.4896  | 2.1580  | -3.5417 |
| 44 | C    | 0.3645  | -1.6849 | 1.3841  |
| 45 | N    | 1.2342  | -1.1721 | 2.2818  |
| 46 | C    | 2.4080  | -0.5333 | 1.9432  |
| 47 | C    | 0.9602  | -1.0987 | 3.7527  |
| 48 | C    | 2.0496  | -0.1582 | 4.2706  |
| 49 | C    | 3.1740  | -0.2785 | 3.2271  |
| 50 | H    | 2.9527  | -0.9569 | 1.1118  |
| 51 | C    | 0.6107  | -2.2319 | 0.0685  |
| 52 | C    | -0.6370 | -2.7458 | -0.4037 |
| 53 | N    | -1.5898 | -2.5480 | 0.5661  |
| 54 | C    | -1.0565 | -1.9473 | 1.7132  |

|    |   |         |         |         |
|----|---|---------|---------|---------|
| 55 | C | 1.7277  | -2.3722 | -0.7503 |
| 56 | C | 1.5796  | -2.9969 | -1.9905 |
| 57 | C | 0.3596  | -3.4896 | -2.4469 |
| 58 | C | -0.7688 | -3.3630 | -1.6412 |
| 59 | O | -1.6976 | -1.7052 | 2.7188  |
| 60 | H | -2.5644 | -2.7993 | 0.5072  |
| 61 | N | 2.7620  | -3.1123 | -2.8536 |
| 62 | O | 3.7983  | -2.5652 | -2.4804 |
| 63 | O | 2.6526  | -3.7410 | -3.8983 |
| 64 | H | -0.0507 | -0.7518 | 3.9270  |
| 65 | H | 1.0631  | -2.1151 | 4.1471  |
| 66 | H | 1.6603  | 0.8602  | 4.2980  |
| 67 | H | 2.3755  | -0.4291 | 5.2754  |
| 68 | H | 3.8075  | 0.6064  | 3.1610  |
| 69 | H | 3.8272  | -1.1320 | 3.4422  |
| 70 | H | 2.7142  | -2.0392 | -0.4724 |
| 71 | H | 0.3098  | -3.9581 | -3.4192 |
| 72 | H | -1.7269 | -3.7452 | -1.9719 |



Prod9

|    | Atom | X       | Y       | Z      |
|----|------|---------|---------|--------|
| 1  | C    | 0.0153  | -3.4388 | 5.2768 |
| 2  | C    | -0.8631 | -2.6238 | 4.3601 |
| 3  | C    | -0.3220 | -1.1941 | 4.1395 |
| 4  | C    | 1.1076  | -1.3698 | 3.5380 |
| 5  | C    | 1.9696  | -2.4835 | 4.0885 |
| 6  | C    | 1.4131  | -3.3189 | 5.1720 |
| 7  | C    | 2.2193  | -3.9701 | 6.1213 |
| 8  | C    | 1.6599  | -4.7897 | 7.0912 |
| 9  | C    | 3.1731  | -2.6112 | 3.4745 |
| 10 | H    | 3.3937  | -1.8012 | 2.7837 |
| 11 | C    | 4.2045  | -3.6504 | 3.5249 |
| 12 | C    | -0.2872 | -0.2761 | 5.4879 |
| 13 | N    | -1.0665 | 0.8817  | 5.0811 |
| 14 | C    | -0.9443 | 1.0791  | 3.6380 |
| 15 | C    | -1.1740 | -0.3433 | 3.1035 |
| 16 | C    | -2.6152 | -0.7778 | 2.9059 |
| 17 | H    | -0.6738 | -0.4398 | 2.1416 |
| 18 | C    | -0.9882 | 2.1957  | 5.7090 |
| 19 | C    | -1.8279 | 3.0645  | 4.7346 |
| 20 | C    | -1.8659 | 2.2782  | 3.3834 |
| 21 | H    | 0.0827  | 1.3616  | 3.3644 |
| 22 | C    | -0.8124 | -0.8751 | 6.7848 |
| 23 | C    | 0.2119  | -0.8899 | 7.7480 |
| 24 | N    | 1.3684  | -0.3519 | 7.2029 |
| 25 | C    | 1.1780  | 0.1086  | 5.9080 |
| 26 | C    | -2.0830 | -1.2763 | 7.1410 |
| 27 | C    | -2.2892 | -1.7399 | 8.4442 |
| 28 | C    | -1.2681 | -1.7852 | 9.3894 |
| 29 | C    | 0.0065  | -1.3484 | 9.0454 |
| 30 | O    | 1.9872  | 0.7414  | 5.2743 |
| 31 | H    | 2.2214  | -0.1666 | 7.7100 |
| 32 | O    | 1.4745  | -0.6993 | 2.5970 |
| 33 | C    | 3.9224  | -5.0195 | 3.6813 |
| 34 | C    | 4.9338  | -5.9693 | 3.6442 |
| 35 | C    | 6.2440  | -5.5483 | 3.4574 |
| 36 | C    | 6.5666  | -4.2115 | 3.2825 |
| 37 | C    | 5.5406  | -3.2741 | 3.2995 |
| 38 | C    | -2.9512 | -1.4655 | 1.7324 |
| 39 | C    | -4.2508 | -1.9002 | 1.4823 |
| 40 | C    | -5.2310 | -1.6350 | 2.4241 |
| 41 | C    | -4.9484 | -0.9479 | 3.5946 |
| 42 | C    | -3.6424 | -0.5239 | 3.8265 |
| 43 | F    | -6.4960 | -2.0525 | 2.1935 |
| 44 | F    | 7.2290  | -6.4700 | 3.4313 |
| 45 | N    | -3.6345 | -2.1894 | 8.8305 |
| 46 | O    | -4.5124 | -2.1616 | 7.9742 |
| 47 | O    | -3.8026 | -2.5689 | 9.9836 |
| 48 | H    | -0.9288 | -3.1034 | 3.3750 |
| 49 | H    | -1.8830 | -2.5971 | 4.7415 |
| 50 | H    | 3.2921  | -3.8320 | 6.0931 |
| 51 | H    | 2.2999  | -5.2871 | 7.8113 |
| 52 | H    | -1.3990 | 2.1764  | 6.7216 |
| 53 | H    | 0.0460  | 2.5695  | 5.7600 |
| 54 | H    | -2.8388 | 3.2050  | 5.1210 |

|    |   |         |         |         |
|----|---|---------|---------|---------|
| 55 | H | -1.3841 | 4.0549  | 4.6200  |
| 56 | H | -2.8827 | 1.9594  | 3.1540  |
| 57 | H | -1.5092 | 2.8809  | 2.5468  |
| 58 | H | -2.9144 | -1.2485 | 6.4529  |
| 59 | H | -1.4888 | -2.1512 | 10.3821 |
| 60 | H | 0.8090  | -1.3583 | 9.7728  |
| 61 | H | 2.8993  | -5.3445 | 3.8163  |
| 62 | H | 4.7229  | -7.0262 | 3.7501  |
| 63 | H | 7.5983  | -3.9244 | 3.1227  |
| 64 | H | 5.7753  | -2.2272 | 3.1426  |
| 65 | H | -2.1819 | -1.6622 | 0.9930  |
| 66 | H | -4.5084 | -2.4311 | 0.5742  |
| 67 | H | -5.7407 | -0.7552 | 4.3074  |
| 68 | H | -3.4143 | 0.0258  | 4.7297  |
| 69 | C | 0.2763  | -4.9705 | 7.1385  |
| 70 | H | -0.1662 | -5.6198 | 7.8852  |
| 71 | C | -0.5353 | -4.2832 | 6.2446  |
| 72 | H | -1.6136 | -4.3825 | 6.3070  |

TS9

|    | Atom | X       | Y       | Z       |
|----|------|---------|---------|---------|
| 1  | C    | -0.8285 | 0.8243  | -1.2163 |
| 2  | C    | 0.2434  | -0.2392 | -1.2305 |
| 3  | C    | 0.1204  | -1.2785 | -0.1456 |
| 4  | C    | -1.1931 | -1.5515 | 0.4441  |
| 5  | C    | -2.3669 | -0.7468 | -0.0494 |
| 6  | C    | -2.0843 | 0.5780  | -0.6360 |
| 7  | C    | -3.0078 | 1.6368  | -0.5593 |
| 8  | C    | -2.7274 | 2.8772  | -1.1131 |
| 9  | C    | -3.5699 | -1.3521 | 0.1040  |
| 10 | H    | -3.5230 | -2.2607 | 0.6992  |
| 11 | C    | -4.9051 | -1.0350 | -0.4137 |
| 12 | C    | 1.2668  | 0.3915  | 1.9928  |
| 13 | N    | 2.1109  | -0.6699 | 2.0609  |
| 14 | C    | 1.6533  | -1.9625 | 1.9976  |
| 15 | C    | 1.1084  | -2.2629 | 0.1409  |
| 16 | C    | 2.3062  | -2.5177 | -0.7121 |
| 17 | H    | 0.6351  | -3.1925 | 0.4510  |
| 18 | C    | 3.5901  | -0.5861 | 2.1468  |
| 19 | C    | 4.0559  | -2.0534 | 2.1750  |
| 20 | C    | 2.7741  | -2.8774 | 2.4309  |
| 21 | H    | 0.6518  | -2.1251 | 2.3818  |
| 22 | C    | 1.5415  | 1.7342  | 1.5479  |
| 23 | C    | 0.4051  | 2.5245  | 1.9057  |
| 24 | N    | -0.4918 | 1.7305  | 2.5733  |
| 25 | C    | -0.0243 | 0.4096  | 2.7163  |
| 26 | C    | 2.5781  | 2.3353  | 0.8388  |
| 27 | C    | 2.4718  | 3.6912  | 0.5282  |
| 28 | C    | 1.3678  | 4.4631  | 0.8922  |
| 29 | C    | 0.3163  | 3.8744  | 1.5860  |
| 30 | O    | -0.5733 | -0.4497 | 3.3779  |
| 31 | H    | -1.3821 | 2.0215  | 2.9452  |
| 32 | O    | -1.3461 | -2.4634 | 1.2610  |
| 33 | C    | -5.1318 | -0.4465 | -1.6708 |
| 34 | C    | -6.4197 | -0.2305 | -2.1428 |
| 35 | C    | -7.4968 | -0.6024 | -1.3496 |
| 36 | C    | -7.3216 | -1.2017 | -0.1123 |
| 37 | C    | -6.0260 | -1.4277 | 0.3389  |
| 38 | C    | 2.5859  | -3.8490 | -1.0644 |
| 39 | C    | 3.6823  | -4.1879 | -1.8510 |
| 40 | C    | 4.5217  | -3.1770 | -2.2912 |
| 41 | C    | 4.2920  | -1.8489 | -1.9653 |
| 42 | C    | 3.1881  | -1.5299 | -1.1801 |
| 43 | F    | 5.5887  | -3.4918 | -3.0554 |
| 44 | F    | -8.7505 | -0.3864 | -1.8043 |
| 45 | N    | 3.5668  | 4.3239  | -0.2170 |
| 46 | O    | 4.5192  | 3.6197  | -0.5432 |
| 47 | O    | 3.4714  | 5.5179  | -0.4766 |
| 48 | H    | 0.2383  | -0.7516 | -2.2074 |
| 49 | H    | 1.2075  | 0.2686  | -1.1865 |
| 50 | H    | -3.9534 | 1.4779  | -0.0579 |
| 51 | H    | -3.4592 | 3.6748  | -1.0476 |
| 52 | H    | 4.0070  | -0.0405 | 1.3017  |
| 53 | H    | 3.8399  | -0.0394 | 3.0598  |
| 54 | H    | 4.4963  | -2.3247 | 1.2164  |

|    |   |         |         |         |
|----|---|---------|---------|---------|
| 55 | H | 4.8103  | -2.2146 | 2.9453  |
| 56 | H | 2.7708  | -3.8262 | 1.8924  |
| 57 | H | 2.6514  | -3.1079 | 3.4944  |
| 58 | H | 3.4653  | 1.8078  | 0.5242  |
| 59 | H | 1.3493  | 5.5095  | 0.6238  |
| 60 | H | -0.5537 | 4.4560  | 1.8642  |
| 61 | H | -4.2899 | -0.1688 | -2.2914 |
| 62 | H | -6.6002 | 0.2119  | -3.1146 |
| 63 | H | -8.1865 | -1.4918 | 0.4710  |
| 64 | H | -5.8747 | -1.9116 | 1.2974  |
| 65 | H | 1.9212  | -4.6355 | -0.7245 |
| 66 | H | 3.8879  | -5.2148 | -2.1264 |
| 67 | H | 4.9689  | -1.0842 | -2.3255 |
| 68 | H | 3.0294  | -0.4911 | -0.9266 |
| 69 | C | -1.5034 | 3.0956  | -1.7477 |
| 70 | H | -1.2771 | 4.0593  | -2.1893 |
| 71 | C | -0.5614 | 2.0758  | -1.7799 |
| 72 | H | 0.4073  | 2.2531  | -2.2359 |

Prod9p

|    | Atom | X       | Y       | Z       |
|----|------|---------|---------|---------|
| 1  | C    | -1.0669 | 1.4534  | 1.1156  |
| 2  | C    | 0.2742  | 0.7661  | 1.0082  |
| 3  | C    | 0.2655  | -0.6336 | 0.3694  |
| 4  | C    | -0.8666 | -1.4034 | 1.1089  |
| 5  | C    | -2.2309 | -0.7527 | 1.1117  |
| 6  | C    | -2.2682 | 0.7221  | 1.2185  |
| 7  | C    | -3.4453 | 1.4264  | 1.5378  |
| 8  | C    | -3.4515 | 2.8063  | 1.6702  |
| 9  | C    | -3.2446 | -1.6505 | 1.0224  |
| 10 | H    | -2.9163 | -2.6823 | 1.1114  |
| 11 | C    | -4.6860 | -1.5238 | 0.7695  |
| 12 | C    | 0.0280  | -0.6179 | -1.2451 |
| 13 | N    | 1.2820  | -1.1730 | -1.7282 |
| 14 | C    | 1.7539  | -2.1710 | -0.7678 |
| 15 | C    | 1.6370  | -1.4107 | 0.5633  |
| 16 | C    | 2.8366  | -0.5659 | 0.9526  |
| 17 | H    | 1.4674  | -2.1257 | 1.3664  |
| 18 | C    | 1.4701  | -1.7377 | -3.0613 |
| 19 | C    | 2.8603  | -2.4108 | -2.9253 |
| 20 | C    | 3.0690  | -2.6525 | -1.3946 |
| 21 | H    | 1.0576  | -3.0214 | -0.7201 |
| 22 | C    | -0.3049 | 0.7063  | -1.9120 |
| 23 | C    | -1.5547 | 0.6130  | -2.5499 |
| 24 | N    | -2.0714 | -0.6641 | -2.3734 |
| 25 | C    | -1.1989 | -1.4941 | -1.6834 |
| 26 | C    | 0.4394  | 1.8599  | -2.0459 |
| 27 | C    | -0.1150 | 2.9256  | -2.7617 |
| 28 | C    | -1.3678 | 2.8476  | -3.3623 |
| 29 | C    | -2.1041 | 1.6709  | -3.2671 |
| 30 | O    | -1.3516 | -2.6816 | -1.5271 |
| 31 | H    | -2.9031 | -1.0251 | -2.8181 |
| 32 | O    | -0.6670 | -2.4641 | 1.6569  |
| 33 | C    | -5.2388 | -0.5941 | -0.1282 |
| 34 | C    | -6.6012 | -0.5763 | -0.4000 |
| 35 | C    | -7.4238 | -1.4958 | 0.2361  |
| 36 | C    | -6.9201 | -2.4413 | 1.1159  |
| 37 | C    | -5.5522 | -2.4593 | 1.3619  |
| 38 | C    | 3.3536  | -0.6865 | 2.2484  |
| 39 | C    | 4.4551  | 0.0551  | 2.6709  |
| 40 | C    | 5.0484  | 0.9287  | 1.7752  |
| 41 | C    | 4.5762  | 1.0757  | 0.4798  |
| 42 | C    | 3.4730  | 0.3275  | 0.0778  |
| 43 | F    | 6.1174  | 1.6550  | 2.1727  |
| 44 | F    | -8.7485 | -1.4753 | -0.0202 |
| 45 | N    | 0.6573  | 4.1706  | -2.8874 |
| 46 | O    | 1.7435  | 4.2257  | -2.3203 |
| 47 | O    | 0.1718  | 5.0812  | -3.5475 |
| 48 | H    | 0.9886  | 1.4175  | 0.5068  |
| 49 | H    | 0.6690  | 0.6459  | 2.0252  |
| 50 | H    | -4.3629 | 0.8827  | 1.7069  |
| 51 | H    | -4.3748 | 3.3175  | 1.9179  |
| 52 | H    | 0.7047  | -2.4909 | -3.3044 |
| 53 | H    | 1.4465  | -0.9601 | -3.8285 |
| 54 | H    | 2.9001  | -3.3387 | -3.4982 |

|    |   |         |         |         |
|----|---|---------|---------|---------|
| 55 | H | 3.6405  | -1.7546 | -3.3150 |
| 56 | H | 3.2533  | -3.7031 | -1.1659 |
| 57 | H | 3.9201  | -2.0784 | -1.0289 |
| 58 | H | 1.4277  | 1.9660  | -1.6238 |
| 59 | H | -1.7431 | 3.7038  | -3.9049 |
| 60 | H | -3.0694 | 1.5836  | -3.7507 |
| 61 | H | -4.5930 | 0.1193  | -0.6237 |
| 62 | H | -7.0325 | 0.1334  | -1.0951 |
| 63 | H | -7.5913 | -3.1512 | 1.5827  |
| 64 | H | -5.1438 | -3.2073 | 2.0320  |
| 65 | H | 2.8883  | -1.3774 | 2.9436  |
| 66 | H | 4.8541  | -0.0395 | 3.6732  |
| 67 | H | 5.0682  | 1.7664  | -0.1940 |
| 68 | H | 3.1049  | 0.4245  | -0.9354 |
| 69 | C | -2.2719 | 3.5294  | 1.4916  |
| 70 | H | -2.2696 | 4.6099  | 1.5770  |
| 71 | C | -1.0922 | 2.8471  | 1.2288  |
| 72 | H | -0.1633 | 3.3981  | 1.1235  |

TS9p

|    | Atom | X       | Y       | Z       |
|----|------|---------|---------|---------|
| 1  | C    | 0.4129  | 0.3959  | -2.3871 |
| 2  | C    | -0.7132 | 0.1299  | -1.4114 |
| 3  | C    | -0.6669 | -1.2400 | -0.7809 |
| 4  | C    | 0.5940  | -1.9785 | -0.7435 |
| 5  | C    | 1.8333  | -1.2444 | -1.1760 |
| 6  | C    | 1.6516  | -0.2547 | -2.2558 |
| 7  | C    | 2.6397  | -0.0299 | -3.2305 |
| 8  | C    | 2.4296  | 0.8623  | -4.2714 |
| 9  | C    | 2.9685  | -1.6035 | -0.5311 |
| 10 | H    | 2.8472  | -2.4615 | 0.1245  |
| 11 | C    | 4.3077  | -1.0047 | -0.5022 |
| 12 | C    | -0.5162 | -0.2500 | 2.0598  |
| 13 | N    | -1.6130 | -1.0462 | 2.1337  |
| 14 | C    | -1.6556 | -2.2788 | 1.5134  |
| 15 | C    | -1.8169 | -1.9796 | -0.3557 |
| 16 | C    | -3.2077 | -1.5485 | -0.6832 |
| 17 | H    | -1.6638 | -3.0418 | -0.5440 |
| 18 | C    | -2.8787 | -0.7009 | 2.8263  |
| 19 | C    | -3.7832 | -1.9257 | 2.6010  |
| 20 | C    | -2.8353 | -3.0328 | 2.0894  |
| 21 | H    | -0.7006 | -2.7915 | 1.4399  |
| 22 | C    | -0.4374 | 1.1861  | 2.0745  |
| 23 | C    | 0.9537  | 1.5198  | 2.1040  |
| 24 | N    | 1.6830  | 0.3608  | 2.1693  |
| 25 | C    | 0.8559  | -0.7799 | 2.1860  |
| 26 | C    | -1.3705 | 2.2160  | 1.9755  |
| 27 | C    | -0.9080 | 3.5313  | 1.9402  |
| 28 | C    | 0.4486  | 3.8545  | 1.9853  |
| 29 | C    | 1.3956  | 2.8382  | 2.0613  |
| 30 | O    | 1.2544  | -1.9187 | 2.3449  |
| 31 | H    | 2.6885  | 0.2887  | 2.1935  |
| 32 | O    | 0.6515  | -3.1308 | -0.3040 |
| 33 | C    | 4.5582  | 0.3664  | -0.6978 |
| 34 | C    | 5.8416  | 0.8877  | -0.5910 |
| 35 | C    | 6.8916  | 0.0317  | -0.2869 |
| 36 | C    | 6.6904  | -1.3222 | -0.0692 |
| 37 | C    | 5.3984  | -1.8266 | -0.1649 |
| 38 | C    | -4.0994 | -2.4953 | -1.2111 |
| 39 | C    | -5.4145 | -2.1665 | -1.5253 |
| 40 | C    | -5.8462 | -0.8678 | -1.3044 |
| 41 | C    | -5.0021 | 0.1021  | -0.7848 |
| 42 | C    | -3.6892 | -0.2452 | -0.4795 |
| 43 | F    | -7.1197 | -0.5379 | -1.6057 |
| 44 | F    | 8.1406  | 0.5365  | -0.1881 |
| 45 | N    | -1.8945 | 4.6152  | 1.8427  |
| 46 | O    | -3.0808 | 4.3040  | 1.7777  |
| 47 | O    | -1.4810 | 5.7684  | 1.8290  |
| 48 | H    | -0.7125 | 0.9247  | -0.6501 |
| 49 | H    | -1.6607 | 0.2489  | -1.9440 |
| 50 | H    | 3.5729  | -0.5754 | -3.1724 |
| 51 | H    | 3.2045  | 1.0176  | -5.0135 |
| 52 | H    | -2.6445 | -0.5318 | 3.8809  |
| 53 | H    | -3.3172 | 0.2124  | 2.4266  |
| 54 | H    | -4.2965 | -2.2135 | 3.5188  |

|    |   |         |         |         |
|----|---|---------|---------|---------|
| 55 | H | -4.5418 | -1.6988 | 1.8529  |
| 56 | H | -2.4806 | -3.6643 | 2.9103  |
| 57 | H | -3.3112 | -3.6884 | 1.3591  |
| 58 | H | -2.4357 | 2.0475  | 1.9376  |
| 59 | H | 0.7404  | 4.8945  | 1.9554  |
| 60 | H | 2.4529  | 3.0716  | 2.0870  |
| 61 | H | 3.7384  | 1.0326  | -0.9324 |
| 62 | H | 6.0388  | 1.9425  | -0.7376 |
| 63 | H | 7.5321  | -1.9568 | 0.1786  |
| 64 | H | 5.2253  | -2.8810 | 0.0193  |
| 65 | H | -3.7526 | -3.5068 | -1.3917 |
| 66 | H | -6.0990 | -2.8959 | -1.9401 |
| 67 | H | -5.3724 | 1.1078  | -0.6286 |
| 68 | H | -3.0382 | 0.5161  | -0.0703 |
| 69 | C | 1.2148  | 1.5424  | -4.3703 |
| 70 | H | 1.0416  | 2.2400  | -5.1818 |
| 71 | C | 0.2150  | 1.2967  | -3.4375 |
| 72 | H | -0.7422 | 1.8004  | -3.5288 |



Prod10

|    | Atom | X       | Y       | Z       |
|----|------|---------|---------|---------|
| 1  | C    | 0.5890  | -4.6836 | -0.2556 |
| 2  | N    | 1.0166  | -6.0444 | -0.3790 |
| 3  | C    | 1.8987  | -6.5121 | 0.7053  |
| 4  | C    | 1.3845  | -6.6460 | -1.6653 |
| 5  | C    | 2.4316  | -7.7104 | -1.2805 |
| 6  | C    | 3.1012  | -7.1225 | -0.0254 |
| 7  | H    | 1.3826  | -7.3172 | 1.2425  |
| 8  | C    | -0.8599 | -4.4234 | -0.7030 |
| 9  | C    | -0.8943 | -3.3441 | -1.6000 |
| 10 | N    | 0.4020  | -2.8852 | -1.8297 |
| 11 | C    | 1.3497  | -3.6824 | -1.2207 |
| 12 | C    | -2.0283 | -5.1128 | -0.4366 |
| 13 | C    | -3.2126 | -4.6510 | -1.0184 |
| 14 | C    | -3.2517 | -3.5536 | -1.8737 |
| 15 | C    | -2.0714 | -2.8856 | -2.1820 |
| 16 | O    | 2.5372  | -3.6167 | -1.4433 |
| 17 | H    | 0.6598  | -2.2303 | -2.5547 |
| 18 | N    | -4.4717 | -5.3530 | -0.7153 |
| 19 | O    | -4.4335 | -6.2635 | 0.1034  |
| 20 | O    | -5.4859 | -4.9820 | -1.2953 |
| 21 | H    | 0.5166  | -7.0864 | -2.1674 |
| 22 | H    | 1.8292  | -5.9087 | -2.3462 |
| 23 | H    | 1.9348  | -8.6541 | -1.0364 |
| 24 | H    | 3.1367  | -7.9048 | -2.0909 |
| 25 | H    | 3.6214  | -7.8732 | 0.5734  |
| 26 | H    | 3.8225  | -6.3545 | -0.3095 |
| 27 | H    | -2.0391 | -5.9788 | 0.2071  |
| 28 | H    | -4.1993 | -3.2476 | -2.2938 |
| 29 | H    | -2.0726 | -2.0459 | -2.8665 |
| 30 | C    | 1.2586  | -2.3901 | 2.8949  |
| 31 | C    | 1.2300  | -2.8117 | 1.4487  |
| 32 | C    | 0.9115  | -4.3115 | 1.2688  |
| 33 | C    | -0.3003 | -4.7117 | 2.1568  |
| 34 | C    | -0.8193 | -3.6963 | 3.1374  |
| 35 | C    | 0.1996  | -2.8016 | 3.7204  |
| 36 | C    | 0.2151  | -2.4546 | 5.0796  |
| 37 | C    | 1.2388  | -1.6691 | 5.5946  |
| 38 | C    | -2.1487 | -3.7680 | 3.3907  |
| 39 | H    | -2.6425 | -4.6234 | 2.9364  |
| 40 | C    | -3.0520 | -2.8867 | 4.1318  |
| 41 | C    | 2.0600  | -5.3307 | 1.7105  |
| 42 | C    | 3.4626  | -4.8067 | 1.9834  |
| 43 | H    | 1.7404  | -5.7248 | 2.6753  |
| 44 | O    | -0.7872 | -5.8214 | 2.0777  |
| 45 | C    | -2.8043 | -1.5231 | 4.3754  |
| 46 | C    | -3.7309 | -0.7339 | 5.0420  |
| 47 | C    | -4.9179 | -1.3105 | 5.4758  |
| 48 | C    | -5.2119 | -2.6449 | 5.2433  |
| 49 | C    | -4.2822 | -3.4189 | 4.5599  |
| 50 | C    | 4.2947  | -4.1898 | 1.0380  |
| 51 | C    | 5.5790  | -3.7661 | 1.3729  |
| 52 | C    | 6.0403  | -3.9644 | 2.6641  |
| 53 | C    | 5.2553  | -4.5723 | 3.6292  |
| 54 | C    | 3.9736  | -4.9851 | 3.2775  |

|    |   |         |         |        |
|----|---|---------|---------|--------|
| 55 | F | 7.2875  | -3.5538 | 2.9904 |
| 56 | F | -5.8147 | -0.5443 | 6.1305 |
| 57 | H | 0.4499  | -2.2348 | 0.9355 |
| 58 | H | 2.1758  | -2.5638 | 0.9698 |
| 59 | H | -0.5733 | -2.8111 | 5.7312 |
| 60 | H | 1.2395  | -1.4079 | 6.6468 |
| 61 | H | -1.8848 | -1.0720 | 4.0284 |
| 62 | H | -3.5516 | 0.3183  | 5.2247 |
| 63 | H | -6.1549 | -3.0548 | 5.5825 |
| 64 | H | -4.5078 | -4.4593 | 4.3544 |
| 65 | H | 3.9408  | -4.0296 | 0.0295 |
| 66 | H | 6.2219  | -3.2900 | 0.6425 |
| 67 | H | 5.6429  | -4.7124 | 4.6306 |
| 68 | H | 3.3544  | -5.4552 | 4.0339 |
| 69 | C | 2.2708  | -1.2322 | 4.7632 |
| 70 | H | 3.0735  | -0.6238 | 5.1640 |
| 71 | C | 2.2815  | -1.6016 | 3.4219 |
| 72 | H | 3.0980  | -1.2904 | 2.7794 |

TS10

|    | Atom | X       | Y       | Z       |
|----|------|---------|---------|---------|
| 1  | C    | 0.9170  | 1.8549  | 0.6202  |
| 2  | N    | 2.0229  | 2.1139  | -0.1264 |
| 3  | C    | 2.1647  | 1.6636  | -1.4206 |
| 4  | C    | 3.2384  | 2.7965  | 0.3897  |
| 5  | C    | 4.2042  | 2.8021  | -0.8095 |
| 6  | C    | 3.3396  | 2.4012  | -2.0287 |
| 7  | H    | 1.2434  | 1.5776  | -1.9893 |
| 8  | C    | -0.4654 | 2.1173  | 0.3020  |
| 9  | C    | -1.2062 | 1.9039  | 1.5007  |
| 10 | N    | -0.3301 | 1.5089  | 2.4948  |
| 11 | C    | 0.9896  | 1.4746  | 2.0364  |
| 12 | C    | -1.1289 | 2.5742  | -0.8320 |
| 13 | C    | -2.5044 | 2.7912  | -0.7403 |
| 14 | C    | -3.2305 | 2.5736  | 0.4298  |
| 15 | C    | -2.5731 | 2.1307  | 1.5747  |
| 16 | O    | 1.9539  | 1.1068  | 2.6979  |
| 17 | H    | -0.5777 | 1.2483  | 3.4363  |
| 18 | N    | -3.2189 | 3.2632  | -1.9357 |
| 19 | O    | -2.5509 | 3.5842  | -2.9121 |
| 20 | O    | -4.4443 | 3.3089  | -1.8901 |
| 21 | H    | 2.9413  | 3.8052  | 0.6899  |
| 22 | H    | 3.6235  | 2.2820  | 1.2683  |
| 23 | H    | 4.6654  | 3.7812  | -0.9424 |
| 24 | H    | 5.0023  | 2.0774  | -0.6571 |
| 25 | H    | 2.9675  | 3.2831  | -2.5603 |
| 26 | H    | 3.8872  | 1.7950  | -2.7510 |
| 27 | H    | -0.6304 | 2.7632  | -1.7698 |
| 28 | H    | -4.2959 | 2.7520  | 0.4272  |
| 29 | H    | -3.1204 | 1.9693  | 2.4953  |
| 30 | C    | 0.5661  | -2.7119 | 0.8727  |
| 31 | C    | 1.5927  | -1.6241 | 0.6522  |
| 32 | C    | 1.3636  | -0.7994 | -0.5872 |
| 33 | C    | 0.0343  | -0.7288 | -1.1856 |
| 34 | C    | -1.0880 | -1.4376 | -0.4809 |
| 35 | C    | -0.7217 | -2.6234 | 0.3193  |
| 36 | C    | -1.5879 | -3.7241 | 0.4521  |
| 37 | C    | -1.2184 | -4.8462 | 1.1778  |
| 38 | C    | -2.3204 | -0.9145 | -0.7004 |
| 39 | H    | -2.3279 | -0.1435 | -1.4655 |
| 40 | C    | -3.6283 | -1.1473 | -0.0848 |
| 41 | C    | 2.4287  | -0.2113 | -1.3508 |
| 42 | C    | 3.8585  | -0.5188 | -1.0451 |
| 43 | H    | 2.2138  | -0.2937 | -2.4161 |
| 44 | O    | -0.1721 | -0.0558 | -2.2065 |
| 45 | C    | -3.8135 | -1.6185 | 1.2286  |
| 46 | C    | -5.0829 | -1.7509 | 1.7743  |
| 47 | C    | -6.1863 | -1.4108 | 1.0020  |
| 48 | C    | -6.0528 | -0.9222 | -0.2877 |
| 49 | C    | -4.7741 | -0.7801 | -0.8146 |
| 50 | C    | 4.4114  | -0.4187 | 0.2427  |
| 51 | C    | 5.7512  | -0.7136 | 0.4772  |
| 52 | C    | 6.5476  | -1.1106 | -0.5866 |
| 53 | C    | 6.0445  | -1.2190 | -1.8735 |
| 54 | C    | 4.7028  | -0.9197 | -2.0912 |

|    |   |         |         |         |
|----|---|---------|---------|---------|
| 55 | F | 7.8475  | -1.3997 | -0.3623 |
| 56 | F | -7.4213 | -1.5465 | 1.5313  |
| 57 | H | 1.6644  | -0.9948 | 1.5529  |
| 58 | H | 2.5736  | -2.1021 | 0.5804  |
| 59 | H | -2.5543 | -3.6980 | -0.0340 |
| 60 | H | -1.9028 | -5.6827 | 1.2630  |
| 61 | H | -2.9537 | -1.8741 | 1.8330  |
| 62 | H | -5.2305 | -2.1084 | 2.7860  |
| 63 | H | -6.9341 | -0.6481 | -0.8537 |
| 64 | H | -4.6572 | -0.3754 | -1.8134 |
| 65 | H | 3.7983  | -0.0943 | 1.0749  |
| 66 | H | 6.1806  | -0.6383 | 1.4686  |
| 67 | H | 6.6945  | -1.5367 | -2.6792 |
| 68 | H | 4.2993  | -1.0131 | -3.0938 |
| 69 | C | 0.0396  | -4.9016 | 1.7801  |
| 70 | H | 0.3369  | -5.7741 | 2.3508  |
| 71 | C | 0.9238  | -3.8442 | 1.6117  |
| 72 | H | 1.9184  | -3.8992 | 2.0430  |

Prod10p

|    | Atom | X       | Y       | Z       |
|----|------|---------|---------|---------|
| 1  | C    | 1.3317  | -2.7082 | -3.6607 |
| 2  | N    | 2.4493  | -2.2428 | -4.4554 |
| 3  | C    | 2.8035  | -0.8756 | -4.1032 |
| 4  | C    | 2.5811  | -2.4054 | -5.8954 |
| 5  | C    | 3.7960  | -1.4907 | -6.2265 |
| 6  | C    | 4.0620  | -0.6442 | -4.9430 |
| 7  | H    | 2.0316  | -0.1546 | -4.4190 |
| 8  | C    | -0.0510 | -2.6334 | -4.3283 |
| 9  | C    | -0.5864 | -3.9318 | -4.4183 |
| 10 | N    | 0.3060  | -4.8448 | -3.8742 |
| 11 | C    | 1.4822  | -4.2545 | -3.4559 |
| 12 | C    | -0.7470 | -1.5798 | -4.8942 |
| 13 | C    | -1.9797 | -1.8490 | -5.4987 |
| 14 | C    | -2.5226 | -3.1289 | -5.5542 |
| 15 | C    | -1.8169 | -4.1964 | -5.0099 |
| 16 | O    | 2.4515  | -4.8504 | -3.0509 |
| 17 | H    | 0.1695  | -5.8437 | -3.8358 |
| 18 | N    | -2.7327 | -0.7355 | -6.0979 |
| 19 | O    | -2.2181 | 0.3761  | -6.0795 |
| 20 | O    | -3.8313 | -0.9846 | -6.5820 |
| 21 | H    | 2.7578  | -3.4526 | -6.1567 |
| 22 | H    | 1.6867  | -2.0680 | -6.4419 |
| 23 | H    | 4.6746  | -2.0824 | -6.4872 |
| 24 | H    | 3.5674  | -0.8561 | -7.0847 |
| 25 | H    | 4.9448  | -1.0121 | -4.4203 |
| 26 | H    | 4.2167  | 0.4122  | -5.1690 |
| 27 | H    | -0.3889 | -0.5617 | -4.8636 |
| 28 | H    | -3.4834 | -3.2712 | -6.0284 |
| 29 | H    | -2.2138 | -5.2032 | -5.0566 |
| 30 | C    | 0.4154  | -3.4911 | -0.6995 |
| 31 | C    | 1.6665  | -2.7087 | -1.0080 |
| 32 | C    | 1.5188  | -1.8530 | -2.2872 |
| 33 | C    | 0.2843  | -0.9301 | -2.0892 |
| 34 | C    | -0.8412 | -1.4260 | -1.2186 |
| 35 | C    | -0.8293 | -2.8520 | -0.8357 |
| 36 | C    | -2.0031 | -3.6029 | -0.6661 |
| 37 | C    | -1.9421 | -4.9404 | -0.2977 |
| 38 | C    | -1.7441 | -0.4760 | -0.8657 |
| 39 | H    | -1.6010 | 0.4724  | -1.3778 |
| 40 | C    | -2.8429 | -0.4738 | 0.1008  |
| 41 | C    | 2.7794  | -0.9232 | -2.5631 |
| 42 | C    | 4.0859  | -1.3304 | -1.9065 |
| 43 | H    | 2.5267  | 0.0682  | -2.1897 |
| 44 | O    | 0.2614  | 0.1815  | -2.5836 |
| 45 | C    | -2.8482 | -1.2374 | 1.2825  |
| 46 | C    | -3.8905 | -1.1408 | 2.1934  |
| 47 | C    | -4.9452 | -0.2793 | 1.9192  |
| 48 | C    | -4.9744 | 0.5037  | 0.7755  |
| 49 | C    | -3.9130 | 0.4132  | -0.1165 |
| 50 | C    | 4.7494  | -2.5363 | -2.1816 |
| 51 | C    | 5.9651  | -2.8410 | -1.5758 |
| 52 | C    | 6.5225  | -1.9331 | -0.6881 |
| 53 | C    | 5.9008  | -0.7333 | -0.3877 |
| 54 | C    | 4.6843  | -0.4439 | -1.0030 |

|    |   |         |         |         |
|----|---|---------|---------|---------|
| 55 | F | 7.7035  | -2.2294 | -0.0972 |
| 56 | F | -5.9630 | -0.1930 | 2.7996  |
| 57 | H | 1.8944  | -2.0211 | -0.1838 |
| 58 | H | 2.5163  | -3.3806 | -1.0935 |
| 59 | H | -2.9653 | -3.1338 | -0.8273 |
| 60 | H | -2.8584 | -5.5052 | -0.1670 |
| 61 | H | -2.0208 | -1.8996 | 1.4986  |
| 62 | H | -3.8957 | -1.7148 | 3.1116  |
| 63 | H | -5.8068 | 1.1746  | 0.6046  |
| 64 | H | -3.9131 | 1.0341  | -1.0054 |
| 65 | H | 4.3029  | -3.2488 | -2.8628 |
| 66 | H | 6.4794  | -3.7720 | -1.7809 |
| 67 | H | 6.3638  | -0.0468 | 0.3103  |
| 68 | H | 4.1941  | 0.4972  | -0.7764 |
| 69 | C | -0.7040 | -5.5552 | -0.1015 |
| 70 | H | -0.6524 | -6.5964 | 0.1967  |
| 71 | C | 0.4654  | -4.8336 | -0.3161 |
| 72 | H | 1.4303  | -5.3173 | -0.2134 |

TS10p

|    | Atom | X       | Y       | Z       |
|----|------|---------|---------|---------|
| 1  | C    | -1.4454 | 1.6969  | 0.9462  |
| 2  | N    | -2.5443 | 1.7911  | 0.1497  |
| 3  | C    | -2.5200 | 1.4734  | -1.1818 |
| 4  | C    | -3.9152 | 2.0899  | 0.6470  |
| 5  | C    | -4.8095 | 1.9314  | -0.5948 |
| 6  | C    | -3.8326 | 1.9019  | -1.7943 |
| 7  | H    | -1.5890 | 1.6583  | -1.7077 |
| 8  | C    | -0.1463 | 2.3123  | 0.7709  |
| 9  | C    | 0.5420  | 2.1562  | 2.0068  |
| 10 | N    | -0.2834 | 1.4913  | 2.8951  |
| 11 | C    | -1.5181 | 1.1827  | 2.3232  |
| 12 | C    | 0.4621  | 3.0174  | -0.2611 |
| 13 | C    | 1.7432  | 3.5240  | -0.0387 |
| 14 | C    | 2.4285  | 3.3501  | 1.1627  |
| 15 | C    | 1.8193  | 2.6612  | 2.2083  |
| 16 | O    | -2.4144 | 0.5522  | 2.8731  |
| 17 | H    | -0.0044 | 1.1179  | 3.7890  |
| 18 | N    | 2.3980  | 4.2723  | -1.1219 |
| 19 | O    | 1.7445  | 4.5058  | -2.1327 |
| 20 | O    | 3.5605  | 4.6257  | -0.9535 |
| 21 | H    | -4.1720 | 1.4288  | 1.4722  |
| 22 | H    | -3.9045 | 3.1165  | 1.0236  |
| 23 | H    | -5.3693 | 0.9990  | -0.5420 |
| 24 | H    | -5.5285 | 2.7474  | -0.6732 |
| 25 | H    | -4.1598 | 1.2283  | -2.5877 |
| 26 | H    | -3.7142 | 2.8950  | -2.2408 |
| 27 | H    | -0.0032 | 3.1766  | -1.2212 |
| 28 | H    | 3.4229  | 3.7607  | 1.2626  |
| 29 | H    | 2.3290  | 2.5321  | 3.1552  |
| 30 | C    | 0.1708  | -1.6964 | 1.5332  |
| 31 | C    | -1.0954 | -1.6894 | 0.7118  |
| 32 | C    | -1.0907 | -0.7327 | -0.4527 |
| 33 | C    | 0.1832  | -0.3039 | -1.0295 |
| 34 | C    | 1.4472  | -0.8548 | -0.4307 |
| 35 | C    | 1.3961  | -1.2894 | 0.9798  |
| 36 | C    | 2.5215  | -1.2112 | 1.8206  |
| 37 | C    | 2.4512  | -1.5941 | 3.1518  |
| 38 | C    | 2.5060  | -0.8859 | -1.2776 |
| 39 | H    | 2.3268  | -0.3673 | -2.2161 |
| 40 | C    | 3.8240  | -1.5200 | -1.1797 |
| 41 | C    | -2.2372 | -0.4679 | -1.2599 |
| 42 | C    | -3.5286 | -1.1971 | -1.0945 |
| 43 | H    | -1.9594 | -0.3702 | -2.3078 |
| 44 | O    | 0.2171  | 0.4387  | -2.0191 |
| 45 | C    | 4.0526  | -2.7375 | -0.5137 |
| 46 | C    | 5.3087  | -3.3289 | -0.5084 |
| 47 | C    | 6.3517  | -2.6958 | -1.1711 |
| 48 | C    | 6.1690  | -1.5037 | -1.8543 |
| 49 | C    | 4.9013  | -0.9332 | -1.8670 |
| 50 | C    | -4.2056 | -1.3424 | 0.1284  |
| 51 | C    | -5.4070 | -2.0396 | 0.2108  |
| 52 | C    | -5.9431 | -2.5959 | -0.9410 |
| 53 | C    | -5.3163 | -2.4688 | -2.1700 |
| 54 | C    | -4.1161 | -1.7672 | -2.2354 |

|    |   |         |         |         |
|----|---|---------|---------|---------|
| 55 | F | -7.1075 | -3.2754 | -0.8625 |
| 56 | F | 7.5756  | -3.2665 | -1.1603 |
| 57 | H | -1.2929 | -2.7034 | 0.3264  |
| 58 | H | -1.9218 | -1.4769 | 1.3907  |
| 59 | H | 3.4545  | -0.8355 | 1.4225  |
| 60 | H | 3.3340  | -1.5294 | 3.7781  |
| 61 | H | 3.2344  | -3.2333 | -0.0081 |
| 62 | H | 5.4889  | -4.2721 | -0.0078 |
| 63 | H | 7.0038  | -1.0468 | -2.3707 |
| 64 | H | 4.7412  | -0.0089 | -2.4107 |
| 65 | H | -3.8090 | -0.8939 | 1.0304  |
| 66 | H | -5.9294 | -2.1526 | 1.1527  |
| 67 | H | -5.7627 | -2.9150 | -3.0499 |
| 68 | H | -3.6160 | -1.6709 | -3.1930 |
| 69 | C | 1.2435  | -2.0542 | 3.6818  |
| 70 | H | 1.1817  | -2.3638 | 4.7191  |
| 71 | C | 0.1135  | -2.0891 | 2.8747  |
| 72 | H | -0.8384 | -2.4014 | 3.2909  |



Prod11

|    | Atom | X       | Y       | Z       |
|----|------|---------|---------|---------|
| 1  | C    | -2.0748 | 2.4902  | -1.5909 |
| 2  | C    | -1.9291 | 1.2382  | -0.7582 |
| 3  | C    | -1.9888 | -0.0222 | -1.5738 |
| 4  | C    | -1.3620 | 0.0003  | -2.9238 |
| 5  | C    | -0.9029 | 1.3511  | -3.5465 |
| 6  | C    | -1.5612 | 2.5686  | -2.8954 |
| 7  | C    | -1.6556 | 3.7985  | -3.5674 |
| 8  | C    | -2.2642 | 4.9021  | -2.9816 |
| 9  | C    | 0.7013  | 1.3291  | -3.5052 |
| 10 | H    | 0.9338  | 0.2729  | -3.6390 |
| 11 | C    | 1.3933  | 1.7419  | -2.2231 |
| 12 | C    | -2.5704 | -1.1847 | -1.2035 |
| 13 | C    | -3.2319 | -1.5552 | 0.0468  |
| 14 | H    | -2.5662 | -1.9585 | -1.9668 |
| 15 | O    | -1.1670 | -1.0314 | -3.5450 |
| 16 | C    | 1.3223  | 3.0323  | -1.6748 |
| 17 | C    | 1.9604  | 3.3367  | -0.4758 |
| 18 | C    | 2.6738  | 2.3452  | 0.1799  |
| 19 | C    | 2.7722  | 1.0600  | -0.3270 |
| 20 | C    | 2.1286  | 0.7711  | -1.5273 |
| 21 | C    | -4.2464 | -2.5302 | -0.0055 |
| 22 | C    | -4.9248 | -2.9366 | 1.1349  |
| 23 | C    | -4.5649 | -2.3798 | 2.3540  |
| 24 | C    | -3.5474 | -1.4434 | 2.4606  |
| 25 | C    | -2.8871 | -1.0346 | 1.3079  |
| 26 | F    | -5.2117 | -2.7735 | 3.4700  |
| 27 | F    | 3.2926  | 2.6415  | 1.3449  |
| 28 | H    | -0.9679 | 1.2853  | -0.2253 |
| 29 | H    | -2.7043 | 1.2271  | 0.0097  |
| 30 | H    | -1.2029 | 3.8977  | -4.5419 |
| 31 | H    | -2.3132 | 5.8372  | -3.5281 |
| 32 | H    | 0.7777  | 3.8111  | -2.1877 |
| 33 | H    | 1.9099  | 4.3308  | -0.0491 |
| 34 | H    | 3.3402  | 0.3101  | 0.2093  |
| 35 | H    | 2.1973  | -0.2341 | -1.9290 |
| 36 | H    | -4.5096 | -2.9657 | -0.9629 |
| 37 | H    | -5.7138 | -3.6772 | 1.0958  |
| 38 | H    | -3.2779 | -1.0567 | 3.4354  |
| 39 | H    | -2.0675 | -0.3354 | 1.3998  |
| 40 | C    | -2.7980 | 4.8065  | -1.6995 |
| 41 | H    | -3.2812 | 5.6595  | -1.2362 |
| 42 | C    | -2.6950 | 3.6036  | -1.0146 |
| 43 | H    | -3.0957 | 3.5187  | -0.0094 |
| 44 | C    | 1.1888  | 1.9784  | -4.8835 |
| 45 | N    | -0.0545 | 2.1545  | -5.6012 |
| 46 | C    | -1.0748 | 1.2495  | -5.0899 |
| 47 | C    | -0.2087 | 2.2225  | -7.0440 |
| 48 | C    | -1.7528 | 2.2603  | -7.1962 |
| 49 | C    | -2.3309 | 1.6529  | -5.8758 |
| 50 | H    | -0.8472 | 0.2048  | -5.3431 |
| 51 | C    | 2.2728  | 1.1081  | -5.5211 |
| 52 | C    | 3.4564  | 1.8569  | -5.6434 |
| 53 | N    | 3.2407  | 3.1431  | -5.1643 |
| 54 | C    | 1.9283  | 3.3512  | -4.7700 |

|    |   |         |         |         |
|----|---|---------|---------|---------|
| 55 | C | 2.2480  | -0.2048 | -5.9494 |
| 56 | C | 3.4177  | -0.7379 | -6.5038 |
| 57 | C | 4.5917  | 0.0003  | -6.6187 |
| 58 | C | 4.6223  | 1.3211  | -6.1805 |
| 59 | O | 1.4672  | 4.4167  | -4.4441 |
| 60 | H | 3.9105  | 3.8975  | -5.1943 |
| 61 | N | 3.4070  | -2.1306 | -6.9791 |
| 62 | O | 2.3560  | -2.7537 | -6.8888 |
| 63 | O | 4.4483  | -2.5855 | -7.4384 |
| 64 | H | 0.2777  | 3.1110  | -7.4552 |
| 65 | H | 0.2090  | 1.3392  | -7.5545 |
| 66 | H | -2.0944 | 3.2894  | -7.3191 |
| 67 | H | -2.0723 | 1.7037  | -8.0787 |
| 68 | H | -2.9269 | 2.3913  | -5.3410 |
| 69 | H | -2.9647 | 0.7856  | -6.0662 |
| 70 | H | 1.3702  | -0.8314 | -5.8654 |
| 71 | H | 5.4647  | -0.4696 | -7.0491 |
| 72 | H | 5.5290  | 1.9083  | -6.2611 |

TS11

|    | Atom | X       | Y       | Z       |
|----|------|---------|---------|---------|
| 1  | C    | 2.2664  | 1.9131  | 0.8714  |
| 2  | C    | 3.1445  | 0.8362  | 0.2802  |
| 3  | C    | 2.4970  | -0.5237 | 0.2646  |
| 4  | C    | 1.0215  | -0.5806 | 0.0014  |
| 5  | C    | 0.2613  | 0.6622  | 0.0703  |
| 6  | C    | 0.8656  | 1.8450  | 0.6995  |
| 7  | C    | 0.0920  | 2.9006  | 1.2220  |
| 8  | C    | 0.6791  | 3.9764  | 1.8826  |
| 9  | C    | -1.0059 | 0.6205  | -0.6509 |
| 10 | H    | -1.0996 | -0.3927 | -1.0279 |
| 11 | C    | -1.3657 | 1.5546  | -1.7742 |
| 12 | C    | 3.1280  | -1.7040 | 0.4370  |
| 13 | C    | 4.5452  | -1.9982 | 0.6646  |
| 14 | H    | 2.4728  | -2.5710 | 0.4169  |
| 15 | O    | 0.4795  | -1.6780 | -0.2442 |
| 16 | C    | -1.1044 | 2.9328  | -1.8215 |
| 17 | C    | -1.4472 | 3.6959  | -2.9333 |
| 18 | C    | -2.0628 | 3.0822  | -4.0123 |
| 19 | C    | -2.3342 | 1.7242  | -4.0156 |
| 20 | C    | -1.9786 | 0.9741  | -2.8991 |
| 21 | C    | 4.8731  | -3.1507 | 1.4039  |
| 22 | C    | 6.1908  | -3.5010 | 1.6657  |
| 23 | C    | 7.2037  | -2.6992 | 1.1596  |
| 24 | C    | 6.9324  | -1.5747 | 0.3962  |
| 25 | C    | 5.6068  | -1.2302 | 0.1525  |
| 26 | F    | 8.4899  | -3.0339 | 1.4031  |
| 27 | F    | -2.4005 | 3.8254  | -5.0908 |
| 28 | H    | 3.3873  | 1.1239  | -0.7553 |
| 29 | H    | 4.0941  | 0.8046  | 0.8177  |
| 30 | H    | -0.9842 | 2.8919  | 1.1082  |
| 31 | H    | 0.0508  | 4.7739  | 2.2648  |
| 32 | H    | -0.6201 | 3.4259  | -0.9935 |
| 33 | H    | -1.2404 | 4.7584  | -2.9693 |
| 34 | H    | -2.7976 | 1.2683  | -4.8818 |
| 35 | H    | -2.1657 | -0.0936 | -2.9081 |
| 36 | H    | 4.0730  | -3.7766 | 1.7833  |
| 37 | H    | 6.4426  | -4.3822 | 2.2426  |
| 38 | H    | 7.7519  | -0.9926 | -0.0068 |
| 39 | H    | 5.4018  | -0.3770 | -0.4791 |
| 40 | C    | 2.0600  | 4.0278  | 2.0506  |
| 41 | H    | 2.5247  | 4.8601  | 2.5666  |
| 42 | C    | 2.8397  | 2.9917  | 1.5412  |
| 43 | H    | 3.9187  | 3.0223  | 1.6599  |
| 44 | C    | -2.5402 | 0.4868  | 0.5378  |
| 45 | N    | -1.9744 | 0.3207  | 1.8343  |
| 46 | C    | -0.9726 | -0.5014 | 2.0458  |
| 47 | C    | -2.3567 | 1.0750  | 3.0687  |
| 48 | C    | -1.1591 | 0.8408  | 3.9994  |
| 49 | C    | -0.5067 | -0.4529 | 3.4618  |
| 50 | H    | -0.6930 | -1.2593 | 1.3228  |
| 51 | C    | -3.3624 | -0.6251 | -0.0287 |
| 52 | C    | -4.5014 | -0.0543 | -0.6362 |
| 53 | N    | -4.4868 | 1.3159  | -0.4180 |
| 54 | C    | -3.4175 | 1.7119  | 0.3666  |

|    |   |         |         |         |
|----|---|---------|---------|---------|
| 55 | C | -3.1712 | -1.9943 | -0.0862 |
| 56 | C | -4.1432 | -2.7609 | -0.7365 |
| 57 | C | -5.2590 | -2.1990 | -1.3500 |
| 58 | C | -5.4474 | -0.8200 | -1.3058 |
| 59 | O | -3.2410 | 2.8405  | 0.7818  |
| 60 | H | -5.1725 | 1.9765  | -0.7510 |
| 61 | N | -3.9755 | -4.2240 | -0.7777 |
| 62 | O | -3.0412 | -4.7063 | -0.1500 |
| 63 | O | -4.7851 | -4.8723 | -1.4301 |
| 64 | H | -2.5374 | 2.1176  | 2.8283  |
| 65 | H | -3.2817 | 0.6324  | 3.4517  |
| 66 | H | -0.4587 | 1.6718  | 3.9105  |
| 67 | H | -1.4654 | 0.7581  | 5.0421  |
| 68 | H | 0.5840  | -0.4520 | 3.5191  |
| 69 | H | -0.8510 | -1.3510 | 3.9909  |
| 70 | H | -2.3007 | -2.4864 | 0.3239  |
| 71 | H | -5.9637 | -2.8477 | -1.8504 |
| 72 | H | -6.3130 | -0.3653 | -1.7718 |

Prod11p

|    | Atom | X       | Y       | Z       |
|----|------|---------|---------|---------|
| 1  | C    | 1.5427  | 0.7529  | -0.7936 |
| 2  | C    | 1.7368  | -0.5362 | -0.0301 |
| 3  | C    | 1.8375  | -1.7403 | -0.9229 |
| 4  | C    | 0.9839  | -1.7677 | -2.1422 |
| 5  | C    | 0.2242  | -0.4847 | -2.5894 |
| 6  | C    | 0.7985  | 0.7969  | -1.9835 |
| 7  | C    | 0.5865  | 2.0501  | -2.5815 |
| 8  | C    | 1.1180  | 3.2139  | -2.0387 |
| 9  | C    | -1.3253 | -0.7622 | -2.2761 |
| 10 | H    | -1.4173 | -1.8362 | -2.4359 |
| 11 | C    | -1.8309 | -0.5120 | -0.8708 |
| 12 | C    | 2.6425  | -2.8092 | -0.7321 |
| 13 | C    | 3.5639  | -3.1163 | 0.3609  |
| 14 | H    | 2.6177  | -3.5454 | -1.5314 |
| 15 | O    | 0.8379  | -2.7936 | -2.7861 |
| 16 | C    | -1.8567 | 0.7522  | -0.2609 |
| 17 | C    | -2.3085 | 0.9071  | 1.0464  |
| 18 | C    | -2.7369 | -0.2085 | 1.7493  |
| 19 | C    | -2.7310 | -1.4735 | 1.1851  |
| 20 | C    | -2.2764 | -1.6121 | -0.1236 |
| 21 | C    | 4.6865  | -3.9166 | 0.0743  |
| 22 | C    | 5.6101  | -4.2525 | 1.0541  |
| 23 | C    | 5.3946  | -3.8043 | 2.3497  |
| 24 | C    | 4.2846  | -3.0446 | 2.6877  |
| 25 | C    | 3.3759  | -2.7031 | 1.6929  |
| 26 | F    | 6.2812  | -4.1318 | 3.3117  |
| 27 | F    | -3.1747 | -0.0573 | 3.0194  |
| 28 | H    | 2.6296  | -0.4526 | 0.5918  |
| 29 | H    | 0.8902  | -0.6614 | 0.6610  |
| 30 | H    | -0.0427 | 2.1122  | -3.4560 |
| 31 | H    | 0.9283  | 4.1644  | -2.5244 |
| 32 | H    | -1.5351 | 1.6258  | -0.8082 |
| 33 | H    | -2.3317 | 1.8801  | 1.5212  |
| 34 | H    | -3.0755 | -2.3231 | 1.7612  |
| 35 | H    | -2.2647 | -2.5999 | -0.5714 |
| 36 | H    | 4.8365  | -4.2698 | -0.9397 |
| 37 | H    | 6.4807  | -4.8574 | 0.8339  |
| 38 | H    | 4.1388  | -2.7412 | 3.7168  |
| 39 | H    | 2.4912  | -2.1456 | 1.9676  |
| 40 | C    | 1.8804  | 3.1570  | -0.8753 |
| 41 | H    | 2.3056  | 4.0581  | -0.4477 |
| 42 | C    | 2.0824  | 1.9285  | -0.2614 |
| 43 | H    | 2.6643  | 1.8713  | 0.6530  |
| 44 | C    | -2.1427 | -0.1478 | -3.5063 |
| 45 | N    | -1.0882 | 0.2492  | -4.4130 |
| 46 | C    | 0.1307  | -0.5009 | -4.1427 |
| 47 | C    | -1.2064 | 0.3942  | -5.8536 |
| 48 | C    | 0.2625  | 0.6813  | -6.2647 |
| 49 | C    | 1.1514  | 0.1253  | -5.1041 |
| 50 | H    | 0.0203  | -1.5584 | -4.4197 |
| 51 | C    | -3.1809 | -1.1547 | -4.0038 |
| 52 | C    | -4.4657 | -0.5987 | -3.8738 |
| 53 | N    | -4.3623 | 0.6869  | -3.3571 |
| 54 | C    | -3.0466 | 1.0854  | -3.1802 |

|    |   |         |         |         |
|----|---|---------|---------|---------|
| 55 | C | -3.0373 | -2.4304 | -4.5134 |
| 56 | C | -4.1943 | -3.1211 | -4.8928 |
| 57 | C | -5.4667 | -2.5744 | -4.7579 |
| 58 | C | -5.6154 | -1.2921 | -4.2371 |
| 59 | O | -2.6992 | 2.1977  | -2.8700 |
| 60 | H | -5.1318 | 1.3262  | -3.2235 |
| 61 | N | -4.0608 | -4.4761 | -5.4514 |
| 62 | O | -2.9295 | -4.9278 | -5.5821 |
| 63 | O | -5.0876 | -5.0729 | -5.7541 |
| 64 | H | -1.5722 | -0.5245 | -6.3409 |
| 65 | H | -1.8855 | 1.2092  | -6.1176 |
| 66 | H | 0.4984  | 0.2148  | -7.2225 |
| 67 | H | 0.4190  | 1.7553  | -6.3783 |
| 68 | H | 1.8635  | -0.6229 | -5.4551 |
| 69 | H | 1.7160  | 0.9286  | -4.6327 |
| 70 | H | -2.0750 | -2.9128 | -4.6210 |
| 71 | H | -6.3225 | -3.1603 | -5.0621 |
| 72 | H | -6.5993 | -0.8533 | -4.1238 |

TS11p

|    | Atom | X       | Y       | Z       |
|----|------|---------|---------|---------|
| 1  | C    | 2.6445  | -1.8557 | 0.6760  |
| 2  | C    | 3.5203  | -0.7747 | 0.0890  |
| 3  | C    | 2.8730  | 0.5854  | 0.0860  |
| 4  | C    | 1.3963  | 0.6447  | -0.1699 |
| 5  | C    | 0.6360  | -0.5982 | -0.1062 |
| 6  | C    | 1.2430  | -1.7859 | 0.5111  |
| 7  | C    | 0.4714  | -2.8453 | 1.0292  |
| 8  | C    | 1.0613  | -3.9262 | 1.6789  |
| 9  | C    | -0.6346 | -0.5509 | -0.8211 |
| 10 | H    | -0.7298 | 0.4652  | -1.1900 |
| 11 | C    | -1.0002 | -1.4765 | -1.9495 |
| 12 | C    | 3.5052  | 1.7643  | 0.2637  |
| 13 | C    | 4.9236  | 2.0566  | 0.4867  |
| 14 | H    | 2.8503  | 2.6316  | 0.2527  |
| 15 | O    | 0.8537  | 1.7440  | -0.4051 |
| 16 | C    | -0.7387 | -2.8541 | -2.0086 |
| 17 | C    | -1.0871 | -3.6090 | -3.1244 |
| 18 | C    | -1.7087 | -2.9874 | -4.1954 |
| 19 | C    | -1.9805 | -1.6295 | -4.1870 |
| 20 | C    | -1.6193 | -0.8878 | -3.0667 |
| 21 | C    | 5.2552  | 3.2040  | 1.2321  |
| 22 | C    | 6.5743  | 3.5522  | 1.4903  |
| 23 | C    | 7.5845  | 2.7535  | 0.9742  |
| 24 | C    | 7.3094  | 1.6342  | 0.2046  |
| 25 | C    | 5.9826  | 1.2917  | -0.0354 |
| 26 | F    | 8.8720  | 3.0861  | 1.2141  |
| 27 | F    | -2.0519 | -3.7225 | -5.2776 |
| 28 | H    | 4.4721  | -0.7471 | 0.6228  |
| 29 | H    | 3.7587  | -1.0549 | -0.9495 |
| 30 | H    | -0.6052 | -2.8355 | 0.9205  |
| 31 | H    | 0.4345  | -4.7265 | 2.0579  |
| 32 | H    | -0.2497 | -3.3533 | -1.1870 |
| 33 | H    | -0.8800 | -4.6710 | -3.1695 |
| 34 | H    | -2.4487 | -1.1672 | -5.0472 |
| 35 | H    | -1.8067 | 0.1799  | -3.0667 |
| 36 | H    | 4.4571  | 3.8276  | 1.6194  |
| 37 | H    | 6.8289  | 4.4295  | 2.0719  |
| 38 | H    | 8.1269  | 1.0545  | -0.2060 |
| 39 | H    | 5.7744  | 0.4427  | -0.6717 |
| 40 | C    | 2.4430  | -3.9794 | 1.8400  |
| 41 | H    | 2.9098  | -4.8157 | 2.3476  |
| 42 | C    | 3.2206  | -2.9395 | 1.3349  |
| 43 | H    | 4.3001  | -2.9713 | 1.4483  |
| 44 | C    | -2.1633 | -0.4255 | 0.3761  |
| 45 | N    | -1.5910 | -0.2688 | 1.6710  |
| 46 | C    | -0.5878 | 0.5515  | 1.8831  |
| 47 | C    | -1.9670 | -1.0323 | 2.9017  |
| 48 | C    | -0.7645 | -0.8050 | 3.8279  |
| 49 | C    | -0.1147 | 0.4925  | 3.2964  |
| 50 | H    | -0.3120 | 1.3147  | 1.1644  |
| 51 | C    | -2.9881 | 0.6905  | -0.1783 |
| 52 | C    | -4.1300 | 0.1243  | -0.7844 |
| 53 | N    | -4.1145 | -1.2474 | -0.5763 |
| 54 | C    | -3.0416 | -1.6492 | 0.2003  |

|    |   |         |         |         |
|----|---|---------|---------|---------|
| 55 | C | -2.7969 | 2.0601  | -0.2268 |
| 56 | C | -3.7719 | 2.8315  | -0.8668 |
| 57 | C | -4.8908 | 2.2742  | -1.4789 |
| 58 | C | -5.0792 | 0.8950  | -1.4439 |
| 59 | O | -2.8634 | -2.7808 | 0.6065  |
| 60 | H | -4.8022 | -1.9054 | -0.9104 |
| 61 | N | -3.6043 | 4.2949  | -0.8981 |
| 62 | O | -2.6668 | 4.7725  | -0.2715 |
| 63 | O | -4.4170 | 4.9481  | -1.5418 |
| 64 | H | -2.8898 | -0.5924 | 3.2928  |
| 65 | H | -2.1490 | -2.0730 | 2.6545  |
| 66 | H | -1.0654 | -0.7300 | 4.8727  |
| 67 | H | -0.0647 | -1.6354 | 3.7292  |
| 68 | H | -0.4561 | 1.3867  | 3.8338  |
| 69 | H | 0.9764  | 0.4910  | 3.3480  |
| 70 | H | -1.9244 | 2.5492  | 0.1828  |
| 71 | H | -5.5978 | 2.9266  | -1.9712 |
| 72 | H | -5.9471 | 0.4438  | -1.9090 |



Prod13

|    | Atom | X       | Y       | Z       |
|----|------|---------|---------|---------|
| 1  | C    | -1.6622 | 1.1810  | -0.3583 |
| 2  | C    | -1.3132 | -0.2328 | 0.0374  |
| 3  | C    | -1.6608 | -1.2215 | -1.0388 |
| 4  | C    | -1.4518 | -0.7984 | -2.4559 |
| 5  | C    | -0.9750 | 0.6460  | -2.7546 |
| 6  | C    | -1.4791 | 1.6268  | -1.6800 |
| 7  | C    | -1.7685 | 2.9740  | -1.9516 |
| 8  | C    | -2.2424 | 3.8355  | -0.9672 |
| 9  | C    | 0.6210  | 0.4803  | -2.8670 |
| 10 | H    | 0.7863  | -0.5944 | -2.9595 |
| 11 | C    | 1.5215  | 0.9276  | -1.7331 |
| 12 | C    | -2.1634 | -2.4612 | -0.8502 |
| 13 | C    | -2.4440 | -3.1901 | 0.3863  |
| 14 | H    | -2.4214 | -2.9899 | -1.7643 |
| 15 | O    | -1.5731 | -1.5996 | -3.3688 |
| 16 | C    | 1.5824  | 2.2454  | -1.2550 |
| 17 | C    | 2.4471  | 2.5967  | -0.2221 |
| 18 | C    | 3.2607  | 1.6241  | 0.3367  |
| 19 | C    | 3.2372  | 0.3118  | -0.1066 |
| 20 | C    | 2.3650  | -0.0230 | -1.1385 |
| 21 | C    | -3.4720 | -4.1521 | 0.3681  |
| 22 | C    | -3.8034 | -4.8849 | 1.4993  |
| 23 | C    | -3.0770 | -4.6734 | 2.6625  |
| 24 | C    | -2.0320 | -3.7633 | 2.7189  |
| 25 | C    | -1.7214 | -3.0256 | 1.5825  |
| 26 | F    | -3.3847 | -5.3859 | 3.7655  |
| 27 | F    | 4.1004  | 1.9645  | 1.3399  |
| 28 | H    | -0.2374 | -0.2820 | 0.2584  |
| 29 | H    | -1.8298 | -0.4852 | 0.9645  |
| 30 | H    | -1.5846 | 3.3903  | -2.9297 |
| 31 | H    | -2.4504 | 4.8688  | -1.2209 |
| 32 | H    | 0.9532  | 3.0094  | -1.6870 |
| 33 | H    | 2.4922  | 3.6118  | 0.1524  |
| 34 | H    | 3.8892  | -0.4232 | 0.3486  |
| 35 | H    | 2.3415  | -1.0494 | -1.4889 |
| 36 | H    | -4.0241 | -4.3156 | -0.5505 |
| 37 | H    | -4.6016 | -5.6164 | 1.4912  |
| 38 | H    | -1.4713 | -3.6507 | 3.6384  |
| 39 | H    | -0.8808 | -2.3464 | 1.6190  |
| 40 | C    | -2.4437 | 3.3743  | 0.3288  |
| 41 | H    | -2.8213 | 4.0356  | 1.1004  |
| 42 | C    | -2.1476 | 2.0500  | 0.6221  |
| 43 | H    | -2.2911 | 1.6750  | 1.6303  |
| 44 | C    | 0.9873  | 0.9986  | -4.3178 |
| 45 | N    | -0.2192 | 0.8299  | -5.1144 |
| 46 | C    | -1.3651 | 1.0988  | -4.2369 |
| 47 | C    | -0.4757 | -0.3927 | -5.8926 |
| 48 | C    | -1.9789 | -0.2810 | -6.1809 |
| 49 | C    | -2.5784 | 0.4844  | -4.9708 |
| 50 | H    | -1.4841 | 2.1737  | -4.1904 |
| 51 | C    | 2.2486  | 0.3691  | -4.8808 |
| 52 | C    | 3.1507  | 1.3831  | -5.2501 |
| 53 | N    | 2.5907  | 2.6211  | -4.9742 |
| 54 | C    | 1.3364  | 2.5207  | -4.3974 |

|    |   |         |         |         |
|----|---|---------|---------|---------|
| 55 | C | 2.6148  | -0.9532 | -5.0271 |
| 56 | C | 3.8741  | -1.2337 | -5.5687 |
| 57 | C | 4.7600  | -0.2313 | -5.9514 |
| 58 | C | 4.4026  | 1.1034  | -5.7887 |
| 59 | O | 0.6531  | 3.4641  | -4.0741 |
| 60 | H | 3.0199  | 3.5154  | -5.1607 |
| 61 | N | 4.2770  | -2.6389 | -5.7313 |
| 62 | O | 3.4935  | -3.5022 | -5.3526 |
| 63 | O | 5.3717  | -2.8651 | -6.2329 |
| 64 | H | 0.1251  | -0.3921 | -6.8046 |
| 65 | H | -0.2717 | -1.3114 | -5.3322 |
| 66 | H | -2.1371 | 0.2891  | -7.0995 |
| 67 | H | -2.4309 | -1.2651 | -6.3125 |
| 68 | H | -3.2459 | 1.2802  | -5.3075 |
| 69 | H | -3.1569 | -0.1751 | -4.3300 |
| 70 | H | 1.9700  | -1.7741 | -4.7470 |
| 71 | H | 5.7192  | -0.5103 | -6.3643 |
| 72 | H | 5.0855  | 1.8957  | -6.0698 |

Prod13p

|    | Atom | X       | Y       | Z       |
|----|------|---------|---------|---------|
| 1  | C    | -0.5505 | 0.8887  | 0.5605  |
| 2  | C    | -1.4922 | 0.0106  | -0.2309 |
| 3  | C    | -2.0408 | -1.1478 | 0.5526  |
| 4  | C    | -1.1229 | -1.8135 | 1.5182  |
| 5  | C    | 0.0589  | -1.0400 | 2.1415  |
| 6  | C    | 0.1878  | 0.4024  | 1.6482  |
| 7  | C    | 1.0501  | 1.2952  | 2.3086  |
| 8  | C    | 1.1785  | 2.6190  | 1.9085  |
| 9  | C    | 1.3358  | -1.9822 | 1.9408  |
| 10 | H    | 0.8935  | -2.9208 | 1.6188  |
| 11 | C    | 2.3528  | -1.6408 | 0.8685  |
| 12 | C    | -3.2838 | -1.6668 | 0.4469  |
| 13 | C    | -4.3987 | -1.2829 | -0.4201 |
| 14 | H    | -3.4998 | -2.4831 | 1.1310  |
| 15 | O    | -1.3001 | -2.9804 | 1.8369  |
| 16 | C    | 3.2960  | -0.6063 | 0.9522  |
| 17 | C    | 4.1944  | -0.3618 | -0.0831 |
| 18 | C    | 4.1483  | -1.1555 | -1.2174 |
| 19 | C    | 3.2352  | -2.1891 | -1.3448 |
| 20 | C    | 2.3489  | -2.4221 | -0.2975 |
| 21 | C    | -5.7080 | -1.5057 | 0.0471  |
| 22 | C    | -6.8196 | -1.1700 | -0.7130 |
| 23 | C    | -6.6207 | -0.6256 | -1.9739 |
| 24 | C    | -5.3507 | -0.4206 | -2.4914 |
| 25 | C    | -4.2466 | -0.7488 | -1.7128 |
| 26 | F    | -7.6937 | -0.3026 | -2.7244 |
| 27 | F    | 5.0188  | -0.9175 | -2.2242 |
| 28 | H    | -2.3078 | 0.6241  | -0.6184 |
| 29 | H    | -0.9563 | -0.3736 | -1.1122 |
| 30 | H    | 1.6495  | 0.9474  | 3.1405  |
| 31 | H    | 1.8562  | 3.2763  | 2.4415  |
| 32 | H    | 3.3411  | 0.0229  | 1.8278  |
| 33 | H    | 4.9214  | 0.4383  | -0.0195 |
| 34 | H    | 3.2285  | -2.7958 | -2.2417 |
| 35 | H    | 1.6371  | -3.2355 | -0.3888 |
| 36 | H    | -5.8499 | -1.9423 | 1.0294  |
| 37 | H    | -7.8274 | -1.3299 | -0.3510 |
| 38 | H    | -5.2400 | -0.0216 | -3.4919 |
| 39 | H    | -3.2594 | -0.6262 | -2.1362 |
| 40 | C    | 0.4363  | 3.0942  | 0.8303  |
| 41 | H    | 0.5204  | 4.1274  | 0.5129  |
| 42 | C    | -0.4202 | 2.2269  | 0.1687  |
| 43 | H    | -1.0088 | 2.5865  | -0.6695 |
| 44 | C    | 1.8427  | -2.3860 | 3.3925  |
| 45 | N    | 0.6980  | -2.1360 | 4.2182  |
| 46 | C    | -0.1377 | -1.0646 | 3.7322  |
| 47 | C    | 0.0582  | -2.9759 | 5.2181  |
| 48 | C    | -1.4424 | -2.7659 | 4.9419  |
| 49 | C    | -1.5225 | -1.3309 | 4.3822  |
| 50 | H    | 0.2158  | -0.0897 | 4.0739  |
| 51 | C    | 2.3862  | -3.8058 | 3.4084  |
| 52 | C    | 3.7227  | -3.7938 | 3.8392  |
| 53 | N    | 4.1003  | -2.4906 | 4.1396  |
| 54 | C    | 3.0769  | -1.5820 | 3.9298  |

|    |   |         |         |        |
|----|---|---------|---------|--------|
| 55 | C | 1.7890  | -4.9949 | 3.0429 |
| 56 | C | 2.5530  | -6.1637 | 3.1319 |
| 57 | C | 3.8770  | -6.1570 | 3.5619 |
| 58 | C | 4.4826  | -4.9564 | 3.9208 |
| 59 | O | 3.1437  | -0.4009 | 4.1859 |
| 60 | H | 4.9918  | -2.2136 | 4.5241 |
| 61 | N | 1.9357  | -7.4465 | 2.7585 |
| 62 | O | 0.7680  | -7.4282 | 2.3886 |
| 63 | O | 2.6248  | -8.4569 | 2.8390 |
| 64 | H | 0.3608  | -4.0197 | 5.1180 |
| 65 | H | 0.3154  | -2.6558 | 6.2392 |
| 66 | H | -1.7748 | -3.4793 | 4.1882 |
| 67 | H | -2.0499 | -2.8956 | 5.8402 |
| 68 | H | -2.3528 | -1.1981 | 3.6878 |
| 69 | H | -1.6678 | -0.6119 | 5.1928 |
| 70 | H | 0.7646  | -5.0452 | 2.6972 |
| 71 | H | 4.4159  | -7.0929 | 3.6065 |
| 72 | H | 5.5140  | -4.9359 | 4.2509 |

Prod14

|    | Atom | X       | Y       | Z       |
|----|------|---------|---------|---------|
| 1  | C    | -0.4380 | -0.0130 | -1.7423 |
| 2  | C    | -1.7381 | 0.1117  | -0.9821 |
| 3  | C    | -1.6724 | 1.1169  | 0.1372  |
| 4  | C    | -0.3342 | 1.4116  | 0.7337  |
| 5  | C    | 0.8404  | 0.4395  | 0.4068  |
| 6  | C    | 0.8002  | 0.1198  | -1.0904 |
| 7  | C    | 1.9658  | -0.0756 | -1.8430 |
| 8  | C    | 1.9154  | -0.3851 | -3.1975 |
| 9  | C    | 2.1895  | 1.0638  | 0.9612  |
| 10 | H    | 1.8697  | 1.5601  | 1.8812  |
| 11 | C    | 2.9130  | 2.1205  | 0.1285  |
| 12 | C    | -2.7107 | 1.8280  | 0.6298  |
| 13 | C    | -4.1343 | 1.7918  | 0.3046  |
| 14 | H    | -2.4330 | 2.5671  | 1.3766  |
| 15 | O    | -0.1574 | 2.3746  | 1.4510  |
| 16 | C    | 4.2630  | 1.9803  | -0.2203 |
| 17 | C    | 4.9475  | 2.9657  | -0.9296 |
| 18 | C    | 4.2695  | 4.1152  | -1.2932 |
| 19 | C    | 2.9399  | 4.3064  | -0.9544 |
| 20 | C    | 2.2748  | 3.3139  | -0.2417 |
| 21 | C    | -4.9038 | 2.9308  | 0.6139  |
| 22 | C    | -6.2618 | 2.9916  | 0.3358  |
| 23 | C    | -6.8706 | 1.8851  | -0.2392 |
| 24 | C    | -6.1624 | 0.7291  | -0.5327 |
| 25 | C    | -4.7999 | 0.6878  | -0.2619 |
| 26 | F    | -8.1911 | 1.9288  | -0.5068 |
| 27 | F    | 4.9218  | 5.0776  | -1.9855 |
| 28 | H    | -2.5331 | 0.3921  | -1.6769 |
| 29 | H    | -2.0136 | -0.8798 | -0.5974 |
| 30 | H    | 2.9328  | 0.0159  | -1.3749 |
| 31 | H    | 2.8370  | -0.5333 | -3.7479 |
| 32 | H    | 4.8107  | 1.0893  | 0.0584  |
| 33 | H    | 5.9908  | 2.8495  | -1.1956 |
| 34 | H    | 2.4416  | 5.2250  | -1.2389 |
| 35 | H    | 1.2487  | 3.4855  | 0.0490  |
| 36 | H    | -4.4180 | 3.7844  | 1.0730  |
| 37 | H    | -6.8515 | 3.8708  | 0.5627  |
| 38 | H    | -6.6813 | -0.1201 | -0.9593 |
| 39 | H    | -4.2622 | -0.2275 | -0.4633 |
| 40 | C    | 0.6861  | -0.4979 | -3.8390 |
| 41 | H    | 0.6356  | -0.7311 | -4.8963 |
| 42 | C    | -0.4792 | -0.3088 | -3.1074 |
| 43 | H    | -1.4435 | -0.3965 | -3.5975 |
| 44 | C    | 0.7001  | -0.9243 | 1.3226  |
| 45 | N    | 2.0083  | -1.0684 | 1.8654  |
| 46 | C    | 3.0198  | -0.1461 | 1.4013  |
| 47 | C    | 2.4376  | -1.9493 | 2.9357  |
| 48 | C    | 3.8746  | -1.4494 | 3.2330  |
| 49 | C    | 3.9331  | -0.0282 | 2.6300  |
| 50 | H    | 3.5974  | -0.5656 | 0.5603  |
| 51 | C    | 0.1559  | -2.1743 | 0.6302  |
| 52 | C    | -1.0352 | -2.5798 | 1.2579  |
| 53 | N    | -1.3483 | -1.6979 | 2.2872  |
| 54 | C    | -0.3518 | -0.7554 | 2.4892  |

|    |   |         |         |         |
|----|---|---------|---------|---------|
| 55 | C | 0.6935  | -2.9546 | -0.3735 |
| 56 | C | -0.0044 | -4.1015 | -0.7641 |
| 57 | C | -1.2013 | -4.4867 | -0.1663 |
| 58 | C | -1.7300 | -3.7217 | 0.8691  |
| 59 | O | -0.2930 | -0.0072 | 3.4077  |
| 60 | H | -2.0838 | -1.8380 | 2.9649  |
| 61 | N | 0.5520  | -4.9388 | -1.8388 |
| 62 | O | 1.6322  | -4.6111 | -2.3145 |
| 63 | O | -0.0964 | -5.9162 | -2.1947 |
| 64 | H | 1.7886  | -1.8477 | 3.8157  |
| 65 | H | 2.4363  | -3.0079 | 2.6415  |
| 66 | H | 4.0950  | -1.4553 | 4.3017  |
| 67 | H | 4.6055  | -2.0994 | 2.7440  |
| 68 | H | 3.5054  | 0.6978  | 3.3274  |
| 69 | H | 4.9516  | 0.2841  | 2.3924  |
| 70 | H | 1.6218  | -2.7046 | -0.8654 |
| 71 | H | -1.6940 | -5.3847 | -0.5112 |
| 72 | H | -2.6472 | -4.0193 | 1.3631  |

Prod14p

|    | Atom | X       | Y       | Z       |
|----|------|---------|---------|---------|
| 1  | C    | 1.4803  | -0.2872 | -2.0942 |
| 2  | C    | 2.4475  | -1.1095 | -1.2791 |
| 3  | C    | 1.7452  | -2.3275 | -0.7347 |
| 4  | C    | 0.3492  | -2.1473 | -0.1866 |
| 5  | C    | -0.2000 | -0.6596 | -0.2506 |
| 6  | C    | 0.1699  | -0.0915 | -1.6198 |
| 7  | C    | -0.7396 | 0.5519  | -2.4688 |
| 8  | C    | -0.3543 | 1.0436  | -3.7134 |
| 9  | C    | 0.5431  | -0.0737 | 1.0698  |
| 10 | H    | 1.2437  | -0.8495 | 1.3894  |
| 11 | C    | 1.3664  | 1.2048  | 1.0368  |
| 12 | C    | 2.2258  | -3.5861 | -0.7280 |
| 13 | C    | 3.5330  | -4.0980 | -1.1476 |
| 14 | H    | 1.5217  | -4.3391 | -0.3819 |
| 15 | O    | -0.2259 | -3.0501 | 0.3653  |
| 16 | C    | 1.1515  | 2.2923  | 0.1827  |
| 17 | C    | 1.9267  | 3.4477  | 0.2692  |
| 18 | C    | 2.9306  | 3.5137  | 1.2191  |
| 19 | C    | 3.1864  | 2.4575  | 2.0801  |
| 20 | C    | 2.4045  | 1.3125  | 1.9767  |
| 21 | C    | 3.6004  | -5.4034 | -1.6685 |
| 22 | C    | 4.8022  | -5.9582 | -2.0877 |
| 23 | C    | 5.9609  | -5.2059 | -1.9598 |
| 24 | C    | 5.9490  | -3.9288 | -1.4201 |
| 25 | C    | 4.7358  | -3.3813 | -1.0173 |
| 26 | F    | 7.1359  | -5.7389 | -2.3564 |
| 27 | F    | 3.6864  | 4.6300  | 1.3067  |
| 28 | H    | 3.2885  | -1.4048 | -1.9067 |
| 29 | H    | 2.8634  | -0.5009 | -0.4648 |
| 30 | H    | -1.7656 | 0.6940  | -2.1677 |
| 31 | H    | -1.0856 | 1.5419  | -4.3396 |
| 32 | H    | 0.3885  | 2.2498  | -0.5800 |
| 33 | H    | 1.7534  | 4.2896  | -0.3888 |
| 34 | H    | 3.9838  | 2.5382  | 2.8083  |
| 35 | H    | 2.6058  | 0.4812  | 2.6446  |
| 36 | H    | 2.6888  | -5.9841 | -1.7541 |
| 37 | H    | 4.8550  | -6.9579 | -2.5004 |
| 38 | H    | 6.8800  | -3.3865 | -1.3109 |
| 39 | H    | 4.7344  | -2.4011 | -0.5598 |
| 40 | C    | 0.9569  | 0.8912  | -4.1483 |
| 41 | H    | 1.2669  | 1.2748  | -5.1135 |
| 42 | C    | 1.8609  | 0.2113  | -3.3397 |
| 43 | H    | 2.8767  | 0.0470  | -3.6837 |
| 44 | C    | -1.7328 | -0.6028 | 0.1473  |
| 45 | N    | -1.6142 | -0.9165 | 1.5622  |
| 46 | C    | -0.5907 | -0.0647 | 2.1324  |
| 47 | C    | -2.6725 | -1.1022 | 2.5362  |
| 48 | C    | -1.8777 | -1.1080 | 3.8798  |
| 49 | C    | -0.4183 | -0.7024 | 3.5143  |
| 50 | H    | -0.9367 | 0.9745  | 2.2755  |
| 51 | C    | -2.5525 | 0.7051  | -0.0059 |
| 52 | C    | -3.8456 | 0.3715  | -0.4591 |
| 53 | N    | -3.8984 | -0.9749 | -0.7674 |
| 54 | C    | -2.6684 | -1.6154 | -0.6257 |

|    |   |         |         |         |
|----|---|---------|---------|---------|
| 55 | C | -2.3043 | 2.0181  | 0.3551  |
| 56 | C | -3.3355 | 2.9577  | 0.2341  |
| 57 | C | -4.6050 | 2.6226  | -0.2220 |
| 58 | C | -4.8719 | 1.3045  | -0.5739 |
| 59 | O | -2.4452 | -2.7087 | -1.0659 |
| 60 | H | -4.6489 | -1.4238 | -1.2718 |
| 61 | N | -3.0570 | 4.3577  | 0.5890  |
| 62 | O | -1.9221 | 4.6376  | 0.9595  |
| 63 | O | -3.9743 | 5.1648  | 0.4933  |
| 64 | H | -3.4123 | -0.2845 | 2.5363  |
| 65 | H | -3.2014 | -2.0411 | 2.3555  |
| 66 | H | -2.3189 | -0.3979 | 4.5817  |
| 67 | H | -1.9033 | -2.0910 | 4.3512  |
| 68 | H | 0.0218  | -0.0245 | 4.2481  |
| 69 | H | 0.2143  | -1.5891 | 3.4327  |
| 70 | H | -1.3448 | 2.3663  | 0.7004  |
| 71 | H | -5.3600 | 3.3924  | -0.2952 |
| 72 | H | -5.8532 | 1.0148  | -0.9302 |



Prod15

|    | Atom | X       | Y       | Z       |
|----|------|---------|---------|---------|
| 1  | C    | 0.8560  | -0.3767 | -1.5705 |
| 2  | C    | 1.1728  | 1.0377  | -2.0008 |
| 3  | C    | 0.0156  | 1.9833  | -1.8440 |
| 4  | C    | -1.0570 | 1.6021  | -0.8861 |
| 5  | C    | -0.7649 | 0.5133  | 0.1710  |
| 6  | C    | -0.0407 | -0.6518 | -0.5205 |
| 7  | C    | -0.1543 | -1.9826 | -0.0968 |
| 8  | C    | 0.5433  | -3.0164 | -0.7117 |
| 9  | C    | 0.0794  | 1.0614  | 1.4155  |
| 10 | H    | -0.3341 | 2.0522  | 1.5943  |
| 11 | C    | 1.5781  | 1.2543  | 1.2994  |
| 12 | C    | -0.1794 | 3.1279  | -2.5359 |
| 13 | C    | 0.6570  | 3.7965  | -3.5287 |
| 14 | H    | -1.1311 | 3.6150  | -2.3408 |
| 15 | O    | -2.1616 | 2.1178  | -0.9357 |
| 16 | C    | 2.5102  | 0.2154  | 1.1511  |
| 17 | C    | 3.8762  | 0.4725  | 1.0699  |
| 18 | C    | 4.3195  | 1.7838  | 1.1422  |
| 19 | C    | 3.4383  | 2.8415  | 1.2960  |
| 20 | C    | 2.0762  | 2.5639  | 1.3747  |
| 21 | C    | 0.0296  | 4.6997  | -4.4093 |
| 22 | C    | 0.7405  | 5.3730  | -5.3924 |
| 23 | C    | 2.1088  | 5.1607  | -5.4829 |
| 24 | C    | 2.7767  | 4.3063  | -4.6181 |
| 25 | C    | 2.0497  | 3.6273  | -3.6478 |
| 26 | F    | 2.8119  | 5.8149  | -6.4293 |
| 27 | F    | 5.6457  | 2.0356  | 1.0638  |
| 28 | H    | 2.0354  | 1.3843  | -1.4169 |
| 29 | H    | 1.4959  | 1.0306  | -3.0451 |
| 30 | H    | -0.7948 | -2.2245 | 0.7345  |
| 31 | H    | 0.4119  | -4.0338 | -0.3618 |
| 32 | H    | 2.1797  | -0.8104 | 1.0809  |
| 33 | H    | 4.5949  | -0.3292 | 0.9528  |
| 34 | H    | 3.8169  | 3.8542  | 1.3567  |
| 35 | H    | 1.3809  | 3.3870  | 1.4968  |
| 36 | H    | -1.0385 | 4.8639  | -4.3212 |
| 37 | H    | 0.2575  | 6.0584  | -6.0774 |
| 38 | H    | 3.8495  | 4.1892  | -4.7068 |
| 39 | H    | 2.5824  | 2.9911  | -2.9560 |
| 40 | C    | 1.3913  | -2.7401 | -1.7797 |
| 41 | H    | 1.9287  | -3.5376 | -2.2795 |
| 42 | C    | 1.5423  | -1.4243 | -2.1938 |
| 43 | H    | 2.2144  | -1.1924 | -3.0137 |
| 44 | C    | -2.1283 | 0.1835  | 0.9293  |
| 45 | N    | -1.7129 | -0.3427 | 2.2194  |
| 46 | C    | -0.4286 | 0.2192  | 2.6391  |
| 47 | C    | -2.0286 | -1.6112 | 2.8583  |
| 48 | C    | -0.8550 | -1.7918 | 3.8503  |
| 49 | C    | 0.3087  | -0.9986 | 3.2218  |
| 50 | H    | -0.5689 | 0.9449  | 3.4524  |
| 51 | C    | -3.2441 | -0.5791 | 0.2108  |
| 52 | C    | -4.4500 | 0.1476  | 0.3425  |
| 53 | N    | -4.2366 | 1.3041  | 1.0552  |
| 54 | C    | -2.8977 | 1.5134  | 1.3398  |

|    |   |         |         |         |
|----|---|---------|---------|---------|
| 55 | C | -3.2749 | -1.7684 | -0.4945 |
| 56 | C | -4.4896 | -2.2105 | -1.0308 |
| 57 | C | -5.6728 | -1.4936 | -0.8907 |
| 58 | C | -5.6577 | -0.2930 | -0.1947 |
| 59 | O | -2.4768 | 2.4672  | 1.9490  |
| 60 | H | -4.9272 | 2.0175  | 1.2334  |
| 61 | N | -4.5120 | -3.4824 | -1.7639 |
| 62 | O | -3.4655 | -4.1184 | -1.8415 |
| 63 | O | -5.5768 | -3.8409 | -2.2553 |
| 64 | H | -2.9918 | -1.5866 | 3.3812  |
| 65 | H | -2.0818 | -2.4477 | 2.1473  |
| 66 | H | -1.1205 | -1.3585 | 4.8186  |
| 67 | H | -0.6147 | -2.8441 | 4.0134  |
| 68 | H | 1.0727  | -0.7206 | 3.9498  |
| 69 | H | 0.7845  | -1.5946 | 2.4431  |
| 70 | H | -2.4020 | -2.3752 | -0.6639 |
| 71 | H | -6.5809 | -1.8831 | -1.3286 |
| 72 | H | -6.5633 | 0.2894  | -0.0766 |

Prod15p

|    | Atom | X       | Y       | Z       |
|----|------|---------|---------|---------|
| 1  | C    | -1.9558 | 2.2357  | 1.0268  |
| 2  | C    | -2.9620 | 1.1123  | 1.0788  |
| 3  | C    | -2.4908 | -0.1633 | 0.4398  |
| 4  | C    | -1.0229 | -0.4137 | 0.3271  |
| 5  | C    | -0.0243 | 0.5677  | 1.0069  |
| 6  | C    | -0.5728 | 1.9913  | 1.0306  |
| 7  | C    | 0.2860  | 3.0950  | 1.1186  |
| 8  | C    | -0.1946 | 4.3976  | 1.1668  |
| 9  | C    | 1.4181  | 0.3798  | 0.3524  |
| 10 | H    | 1.4044  | -0.6771 | 0.0933  |
| 11 | C    | 1.6891  | 1.0810  | -0.9760 |
| 12 | C    | -3.2936 | -1.1143 | -0.0914 |
| 13 | C    | -4.7488 | -1.2156 | -0.1530 |
| 14 | H    | -2.7623 | -1.9266 | -0.5800 |
| 15 | O    | -0.6015 | -1.3927 | -0.2641 |
| 16 | C    | 2.4650  | 2.2350  | -1.1404 |
| 17 | C    | 2.6978  | 2.7914  | -2.3969 |
| 18 | C    | 2.1426  | 2.1872  | -3.5105 |
| 19 | C    | 1.3801  | 1.0361  | -3.4019 |
| 20 | C    | 1.1695  | 0.4894  | -2.1405 |
| 21 | C    | -5.3013 | -2.0408 | -1.1532 |
| 22 | C    | -6.6723 | -2.1959 | -1.2969 |
| 23 | C    | -7.5102 | -1.5354 | -0.4094 |
| 24 | C    | -7.0140 | -0.7382 | 0.6115  |
| 25 | C    | -5.6390 | -0.5798 | 0.7342  |
| 26 | F    | -8.8439 | -1.6846 | -0.5336 |
| 27 | F    | 2.3602  | 2.7251  | -4.7330 |
| 28 | H    | -3.2192 | 0.9329  | 2.1328  |
| 29 | H    | -3.8874 | 1.4401  | 0.5985  |
| 30 | H    | 1.3482  | 2.9327  | 1.1712  |
| 31 | H    | 0.5014  | 5.2257  | 1.2362  |
| 32 | H    | 2.9165  | 2.7209  | -0.2896 |
| 33 | H    | 3.3019  | 3.6824  | -2.5152 |
| 34 | H    | 0.9746  | 0.5735  | -4.2934 |
| 35 | H    | 0.5974  | -0.4253 | -2.0558 |
| 36 | H    | -4.6351 | -2.5593 | -1.8335 |
| 37 | H    | -7.0976 | -2.8200 | -2.0727 |
| 38 | H    | -7.7023 | -0.2601 | 1.2972  |
| 39 | H    | -5.2609 | 0.0158  | 1.5523  |
| 40 | C    | -1.5659 | 4.6319  | 1.1235  |
| 41 | H    | -1.9547 | 5.6431  | 1.1525  |
| 42 | C    | -2.4328 | 3.5505  | 1.0564  |
| 43 | H    | -3.5047 | 3.7198  | 1.0421  |
| 44 | C    | 0.2952  | 0.0786  | 2.5385  |
| 45 | N    | 1.5857  | 0.6794  | 2.7111  |
| 46 | C    | 2.4293  | 0.4475  | 1.5410  |
| 47 | C    | 2.4344  | 0.5772  | 3.8899  |
| 48 | C    | 3.7766  | 1.1856  | 3.3721  |
| 49 | C    | 3.5751  | 1.4247  | 1.8445  |
| 50 | H    | 2.8825  | -0.5548 | 1.5904  |
| 51 | C    | -0.7288 | 0.4440  | 3.5914  |
| 52 | C    | -1.3457 | -0.7283 | 4.0678  |
| 53 | N    | -0.7750 | -1.8379 | 3.4586  |
| 54 | C    | 0.3026  | -1.4891 | 2.6492  |

|    |   |         |         |        |
|----|---|---------|---------|--------|
| 55 | C | -1.0754 | 1.6691  | 4.1257 |
| 56 | C | -2.0791 | 1.6975  | 5.0999 |
| 57 | C | -2.7194 | 0.5441  | 5.5458 |
| 58 | C | -2.3493 | -0.6953 | 5.0317 |
| 59 | O | 1.1002  | -2.2651 | 2.1864 |
| 60 | H | -0.9443 | -2.7970 | 3.7265 |
| 61 | N | -2.4665 | 2.9917  | 5.6836 |
| 62 | O | -1.8437 | 3.9850  | 5.3294 |
| 63 | O | -3.3903 | 3.0003  | 6.4898 |
| 64 | H | 2.0099  | 1.1326  | 4.7289 |
| 65 | H | 2.5885  | -0.4652 | 4.2104 |
| 66 | H | 4.0225  | 2.1146  | 3.8884 |
| 67 | H | 4.5966  | 0.4873  | 3.5498 |
| 68 | H | 3.2882  | 2.4633  | 1.6779 |
| 69 | H | 4.4785  | 1.2184  | 1.2684 |
| 70 | H | -0.6005 | 2.5876  | 3.8135 |
| 71 | H | -3.4892 | 0.6322  | 6.2995 |
| 72 | H | -2.8208 | -1.6036 | 5.3865 |

Prod5k

|    | Atom | X       | Y       | Z       |
|----|------|---------|---------|---------|
| 1  | C    | 2.3021  | 3.0838  | 1.9686  |
| 2  | N    | 2.9783  | 3.6921  | 0.8399  |
| 3  | C    | 3.4583  | 2.6554  | -0.1119 |
| 4  | C    | 4.0307  | 4.7011  | 1.0683  |
| 5  | C    | 5.0803  | 4.4052  | -0.0198 |
| 6  | C    | 4.9714  | 2.8832  | -0.2180 |
| 7  | H    | 3.0035  | 2.8494  | -1.0909 |
| 8  | C    | 1.3341  | 4.0058  | 2.6888  |
| 9  | C    | 1.5308  | 3.9058  | 4.0776  |
| 10 | N    | 2.5968  | 3.0510  | 4.3360  |
| 11 | C    | 3.2524  | 2.6783  | 3.1691  |
| 12 | C    | 0.4278  | 4.9168  | 2.1930  |
| 13 | C    | -0.3316 | 5.6556  | 3.1055  |
| 14 | C    | -0.1782 | 5.5195  | 4.4826  |
| 15 | C    | 0.7743  | 4.6393  | 4.9868  |
| 16 | O    | 4.3572  | 2.1996  | 3.1201  |
| 17 | H    | 3.0402  | 2.9436  | 5.2372  |
| 18 | N    | -1.3261 | 6.6050  | 2.5916  |
| 19 | O    | -1.4634 | 6.6847  | 1.3743  |
| 20 | O    | -1.9672 | 7.2617  | 3.4040  |
| 21 | H    | 3.6272  | 5.7147  | 0.9913  |
| 22 | H    | 4.4835  | 4.5938  | 2.0613  |
| 23 | H    | 4.8210  | 4.9275  | -0.9460 |
| 24 | H    | 6.0796  | 4.7307  | 0.2754  |
| 25 | H    | 5.3859  | 2.5442  | -1.1696 |
| 26 | H    | 5.4831  | 2.3603  | 0.5939  |
| 27 | H    | 0.3000  | 5.0785  | 1.1339  |
| 28 | H    | -0.7953 | 6.1161  | 5.1395  |
| 29 | H    | 0.9302  | 4.5465  | 6.0547  |
| 30 | C    | -0.8411 | 2.1922  | 1.0697  |
| 31 | C    | 0.4891  | 2.0677  | 0.3714  |
| 32 | C    | 1.6888  | 1.7620  | 1.3003  |
| 33 | C    | 1.3230  | 0.6632  | 2.3251  |
| 34 | C    | -0.1275 | 0.3166  | 2.5208  |
| 35 | C    | -1.1305 | 1.3294  | 2.1389  |
| 36 | C    | -2.3311 | 1.5007  | 2.8470  |
| 37 | C    | -3.2611 | 2.4518  | 2.4503  |
| 38 | C    | -0.3463 | -0.9246 | 3.0258  |
| 39 | H    | 0.5600  | -1.4300 | 3.3498  |
| 40 | C    | -1.5617 | -1.7263 | 3.1750  |
| 41 | C    | 2.9608  | 1.3233  | 0.4687  |
| 42 | C    | 2.7894  | 0.1689  | -0.5001 |
| 43 | H    | 3.6853  | 1.0039  | 1.2171  |
| 44 | O    | 2.2056  | 0.0578  | 2.9042  |
| 45 | C    | -2.6829 | -1.6173 | 2.3317  |
| 46 | C    | -3.7786 | -2.4549 | 2.4838  |
| 47 | C    | -3.7618 | -3.4081 | 3.4940  |
| 48 | C    | -2.6729 | -3.5623 | 4.3379  |
| 49 | C    | -1.5740 | -2.7307 | 4.1599  |
| 50 | C    | 3.1003  | -1.1274 | -0.0629 |
| 51 | C    | 2.9701  | -2.2308 | -0.9005 |
| 52 | C    | 2.5292  | -2.0319 | -2.1992 |
| 53 | C    | 2.2197  | -0.7694 | -2.6774 |
| 54 | C    | 2.3518  | 0.3231  | -1.8228 |

|    |   |         |         |         |
|----|---|---------|---------|---------|
| 55 | F | 2.4045  | -3.0963 | -3.0237 |
| 56 | F | -4.8310 | -4.2158 | 3.6482  |
| 57 | H | 0.4238  | 1.2428  | -0.3464 |
| 58 | H | 0.6946  | 2.9674  | -0.2110 |
| 59 | H | -2.5309 | 0.8825  | 3.7131  |
| 60 | H | -4.1822 | 2.5721  | 3.0090  |
| 61 | H | -2.6903 | -0.8811 | 1.5395  |
| 62 | H | -4.6395 | -2.3851 | 1.8307  |
| 63 | H | -2.6909 | -4.3275 | 5.1036  |
| 64 | H | -0.7073 | -2.8537 | 4.7999  |
| 65 | H | 3.4460  | -1.2699 | 0.9541  |
| 66 | H | 3.2113  | -3.2311 | -0.5632 |
| 67 | H | 1.8865  | -0.6512 | -3.7010 |
| 68 | H | 2.1149  | 1.3064  | -2.2098 |
| 69 | C | -3.0042 | 3.2549  | 1.3382  |
| 70 | H | -3.7264 | 3.9967  | 1.0179  |
| 71 | C | -1.7953 | 3.1279  | 0.6635  |
| 72 | H | -1.5789 | 3.7819  | -0.1744 |

TS5k

|    | Atom | X       | Y       | Z       |
|----|------|---------|---------|---------|
| 1  | C    | -2.3645 | 0.0268  | -1.0529 |
| 2  | N    | -2.5223 | -1.2761 | -1.3768 |
| 3  | C    | -2.5485 | -2.2968 | -0.4631 |
| 4  | C    | -2.5090 | -1.7888 | -2.7860 |
| 5  | C    | -2.3301 | -3.2983 | -2.6131 |
| 6  | C    | -2.8642 | -3.5811 | -1.1968 |
| 7  | H    | -3.0445 | -2.1011 | 0.4753  |
| 8  | C    | -2.8002 | 0.7318  | 0.1357  |
| 9  | C    | -2.5860 | 2.1226  | -0.1101 |
| 10 | N    | -2.0605 | 2.2722  | -1.3704 |
| 11 | C    | -1.9295 | 1.0489  | -2.0401 |
| 12 | C    | -3.3785 | 0.3608  | 1.3453  |
| 13 | C    | -3.7030 | 1.3581  | 2.2685  |
| 14 | C    | -3.4850 | 2.7120  | 2.0245  |
| 15 | C    | -2.9208 | 3.1030  | 0.8140  |
| 16 | O    | -1.5328 | 0.9335  | -3.1834 |
| 17 | H    | -1.7835 | 3.1408  | -1.7996 |
| 18 | N    | -4.2768 | 0.9502  | 3.5556  |
| 19 | O    | -4.3449 | -0.2546 | 3.7964  |
| 20 | O    | -4.6507 | 1.8270  | 4.3245  |
| 21 | H    | -3.4770 | -1.5290 | -3.2269 |
| 22 | H    | -1.7202 | -1.3055 | -3.3489 |
| 23 | H    | -2.8595 | -3.8603 | -3.3832 |
| 24 | H    | -1.2688 | -3.5402 | -2.6758 |
| 25 | H    | -3.9480 | -3.7477 | -1.2029 |
| 26 | H    | -2.4068 | -4.4498 | -0.7211 |
| 27 | H    | -3.6094 | -0.6582 | 1.6082  |
| 28 | H    | -3.7560 | 3.4345  | 2.7808  |
| 29 | H    | -2.7448 | 4.1500  | 0.6009  |
| 30 | C    | 0.6261  | 1.0518  | 1.3195  |
| 31 | C    | 0.1160  | -0.3493 | 1.5560  |
| 32 | C    | -0.1016 | -1.1689 | 0.3169  |
| 33 | C    | 0.5502  | -0.8054 | -0.9394 |
| 34 | C    | 1.4768  | 0.3815  | -0.9276 |
| 35 | C    | 1.2633  | 1.4040  | 0.1170  |
| 36 | C    | 1.6072  | 2.7536  | -0.0878 |
| 37 | C    | 1.4037  | 3.7071  | 0.8985  |
| 38 | C    | 2.4206  | 0.3686  | -1.8996 |
| 39 | H    | 2.2715  | -0.4179 | -2.6351 |
| 40 | C    | 3.6203  | 1.1853  | -2.1166 |
| 41 | C    | -0.7192 | -2.4448 | 0.3180  |
| 42 | C    | -0.9208 | -3.2723 | 1.5470  |
| 43 | H    | -0.3558 | -3.0371 | -0.5170 |
| 44 | O    | 0.4244  | -1.5072 | -1.9508 |
| 45 | C    | 4.4260  | 1.6689  | -1.0707 |
| 46 | C    | 5.5909  | 2.3796  | -1.3288 |
| 47 | C    | 5.9554  | 2.6145  | -2.6476 |
| 48 | C    | 5.2014  | 2.1420  | -3.7102 |
| 49 | C    | 4.0470  | 1.4170  | -3.4358 |
| 50 | C    | -0.3716 | -4.5648 | 1.5610  |
| 51 | C    | -0.5101 | -5.4073 | 2.6594  |
| 52 | C    | -1.2229 | -4.9540 | 3.7583  |
| 53 | C    | -1.7947 | -3.6920 | 3.7846  |
| 54 | C    | -1.6394 | -2.8598 | 2.6798  |

|    |   |         |         |         |
|----|---|---------|---------|---------|
| 55 | F | -1.3688 | -5.7659 | 4.8274  |
| 56 | F | 7.0850  | 3.3116  | -2.9010 |
| 57 | H | 0.8080  | -0.8896 | 2.2218  |
| 58 | H | -0.8133 | -0.2688 | 2.1276  |
| 59 | H | 2.0367  | 3.0509  | -1.0351 |
| 60 | H | 1.6856  | 4.7384  | 0.7174  |
| 61 | H | 4.1440  | 1.4733  | -0.0442 |
| 62 | H | 6.2212  | 2.7448  | -0.5276 |
| 63 | H | 5.5259  | 2.3333  | -4.7255 |
| 64 | H | 3.4559  | 1.0285  | -4.2577 |
| 65 | H | 0.1869  | -4.9121 | 0.6987  |
| 66 | H | -0.0785 | -6.4003 | 2.6716  |
| 67 | H | -2.3557 | -3.3715 | 4.6535  |
| 68 | H | -2.1017 | -1.8824 | 2.7205  |
| 69 | C | 0.8345  | 3.3363  | 2.1184  |
| 70 | H | 0.6804  | 4.0720  | 2.8995  |
| 71 | C | 0.4377  | 2.0202  | 2.3113  |
| 72 | H | -0.0434 | 1.7340  | 3.2413  |



Prod4k

|    | Atom | X       | Y       | Z       |
|----|------|---------|---------|---------|
| 1  | C    | -0.4912 | 1.1416  | -1.6245 |
| 2  | N    | -0.8248 | 1.7030  | -2.9322 |
| 3  | C    | -2.2893 | 1.8607  | -2.9832 |
| 4  | C    | -0.3911 | 1.0615  | -4.1892 |
| 5  | C    | -1.2806 | 1.7732  | -5.2103 |
| 6  | C    | -2.6418 | 1.8922  | -4.4885 |
| 7  | H    | -2.5629 | 2.7917  | -2.4879 |
| 8  | C    | 0.9261  | 0.5821  | -1.5555 |
| 9  | C    | 1.7234  | 1.4469  | -0.7818 |
| 10 | N    | 0.9539  | 2.4989  | -0.3139 |
| 11 | C    | -0.3677 | 2.4049  | -0.7030 |
| 12 | C    | 1.5081  | -0.5308 | -2.1336 |
| 13 | C    | 2.8687  | -0.7608 | -1.9059 |
| 14 | C    | 3.6533  | 0.0917  | -1.1356 |
| 15 | C    | 3.0779  | 1.2191  | -0.5612 |
| 16 | O    | -1.2317 | 3.1976  | -0.4048 |
| 17 | H    | 1.2863  | 3.2603  | 0.2588  |
| 18 | N    | 3.4926  | -1.9519 | -2.5026 |
| 19 | O    | 2.7805  | -2.6975 | -3.1653 |
| 20 | O    | 4.6882  | -2.1320 | -2.3007 |
| 21 | H    | 0.6723  | 1.2336  | -4.3619 |
| 22 | H    | -0.5802 | -0.0194 | -4.2071 |
| 23 | H    | -0.8751 | 2.7666  | -5.4184 |
| 24 | H    | -1.3454 | 1.2280  | -6.1539 |
| 25 | H    | -3.1739 | 2.8037  | -4.7645 |
| 26 | H    | -3.2907 | 1.0502  | -4.7418 |
| 27 | H    | 0.9563  | -1.2286 | -2.7450 |
| 28 | H    | 4.7000  | -0.1396 | -0.9975 |
| 29 | H    | 3.6708  | 1.8969  | 0.0404  |
| 30 | C    | -1.0415 | -0.1230 | 1.2304  |
| 31 | C    | -2.1379 | 0.3515  | 0.3148  |
| 32 | C    | -1.7433 | 0.2141  | -1.1752 |
| 33 | C    | -1.3742 | -1.2679 | -1.4310 |
| 34 | C    | -0.8790 | -2.0837 | -0.2633 |
| 35 | C    | -0.4182 | -1.3467 | 0.9312  |
| 36 | C    | 0.6613  | -1.7729 | 1.7190  |
| 37 | C    | 1.0730  | -1.0288 | 2.8178  |
| 38 | C    | -0.9089 | -3.4268 | -0.4537 |
| 39 | H    | -1.1575 | -3.7213 | -1.4702 |
| 40 | C    | -0.7018 | -4.5480 | 0.4636  |
| 41 | C    | -2.8696 | 0.6510  | -2.1906 |
| 42 | C    | -4.2584 | 0.8844  | -1.6319 |
| 43 | H    | -2.9412 | -0.1743 | -2.8995 |
| 44 | O    | -1.4932 | -1.7605 | -2.5394 |
| 45 | C    | -1.0048 | -4.5004 | 1.8366  |
| 46 | C    | -0.8453 | -5.6174 | 2.6442  |
| 47 | C    | -0.3692 | -6.7933 | 2.0784  |
| 48 | C    | -0.0714 | -6.8897 | 0.7279  |
| 49 | C    | -0.2570 | -5.7697 | -0.0733 |
| 50 | C    | -4.6006 | 2.0473  | -0.9254 |
| 51 | C    | -5.8905 | 2.2440  | -0.4409 |
| 52 | C    | -6.8479 | 1.2671  | -0.6678 |
| 53 | C    | -6.5543 | 0.1055  | -1.3624 |
| 54 | C    | -5.2582 | -0.0737 | -1.8410 |

|    |   |         |         |         |
|----|---|---------|---------|---------|
| 55 | F | -8.1033 | 1.4557  | -0.2001 |
| 56 | F | -0.2055 | -7.8763 | 2.8653  |
| 57 | H | -3.0373 | -0.2546 | 0.4731  |
| 58 | H | -2.4133 | 1.3764  | 0.5477  |
| 59 | H | 1.1827  | -2.6868 | 1.4639  |
| 60 | H | 1.9079  | -1.3727 | 3.4178  |
| 61 | H | -1.3844 | -3.5857 | 2.2718  |
| 62 | H | -1.0886 | -5.5935 | 3.6991  |
| 63 | H | 0.2857  | -7.8277 | 0.3219  |
| 64 | H | -0.0425 | -5.8344 | -1.1341 |
| 65 | H | -3.8508 | 2.8078  | -0.7414 |
| 66 | H | -6.1602 | 3.1398  | 0.1049  |
| 67 | H | -7.3291 | -0.6333 | -1.5256 |
| 68 | H | -5.0204 | -0.9776 | -2.3917 |
| 69 | C | 0.4196  | 0.1609  | 3.1413  |
| 70 | H | 0.7338  | 0.7390  | 4.0031  |
| 71 | C | -0.6250 | 0.6137  | 2.3407  |
| 72 | H | -1.1200 | 1.5517  | 2.5694  |

TS4k

|    | Atom | X       | Y       | Z       |
|----|------|---------|---------|---------|
| 1  | C    | 1.0124  | -1.9777 | 0.7026  |
| 2  | N    | 1.8404  | -2.2543 | -0.3332 |
| 3  | C    | 3.0519  | -1.6479 | -0.5030 |
| 4  | C    | 1.4814  | -3.1306 | -1.4840 |
| 5  | C    | 2.6150  | -2.8950 | -2.4910 |
| 6  | C    | 3.7690  | -2.3238 | -1.6454 |
| 7  | H    | 3.5672  | -1.3801 | 0.4072  |
| 8  | C    | -0.3558 | -2.4048 | 0.9086  |
| 9  | C    | -0.6939 | -2.0449 | 2.2458  |
| 10 | N    | 0.4058  | -1.4719 | 2.8415  |
| 11 | C    | 1.4936  | -1.3950 | 1.9692  |
| 12 | C    | -1.3321 | -3.0007 | 0.1138  |
| 13 | C    | -2.5888 | -3.2321 | 0.6713  |
| 14 | C    | -2.9132 | -2.8833 | 1.9823  |
| 15 | C    | -1.9536 | -2.2768 | 2.7843  |
| 16 | O    | 2.5937  | -0.9511 | 2.2854  |
| 17 | H    | 0.4268  | -1.0382 | 3.7511  |
| 18 | N    | -3.6172 | -3.8677 | -0.1659 |
| 19 | O    | -3.3096 | -4.1830 | -1.3110 |
| 20 | O    | -4.7252 | -4.0482 | 0.3264  |
| 21 | H    | 1.4400  | -4.1612 | -1.1188 |
| 22 | H    | 0.5188  | -2.8382 | -1.8871 |
| 23 | H    | 2.8876  | -3.8109 | -3.0156 |
| 24 | H    | 2.2889  | -2.1634 | -3.2309 |
| 25 | H    | 4.4131  | -3.1200 | -1.2535 |
| 26 | H    | 4.4100  | -1.6350 | -2.1975 |
| 27 | H    | -1.1688 | -3.2906 | -0.9106 |
| 28 | H    | -3.9078 | -3.0905 | 2.3500  |
| 29 | H    | -2.1851 | -1.9901 | 3.8026  |
| 30 | C    | 0.2226  | 1.7962  | 1.5480  |
| 31 | C    | 1.5317  | 1.6571  | 0.8105  |
| 32 | C    | 1.5056  | 0.7024  | -0.3499 |
| 33 | C    | 0.2421  | 0.3430  | -0.9871 |
| 34 | C    | -1.0050 | 1.0125  | -0.4748 |
| 35 | C    | -0.9979 | 1.4770  | 0.9284  |
| 36 | C    | -2.1737 | 1.5178  | 1.7002  |
| 37 | C    | -2.1521 | 1.9324  | 3.0236  |
| 38 | C    | -2.0087 | 1.1106  | -1.3801 |
| 39 | H    | -1.8197 | 0.5611  | -2.2989 |
| 40 | C    | -3.2749 | 1.8516  | -1.3653 |
| 41 | C    | 2.6699  | 0.2775  | -1.0257 |
| 42 | C    | 4.0027  | 0.9319  | -0.8663 |
| 43 | H    | 2.4497  | 0.0047  | -2.0543 |
| 44 | O    | 0.2051  | -0.4147 | -1.9674 |
| 45 | C    | -3.4287 | 3.1087  | -0.7547 |
| 46 | C    | -4.6309 | 3.8001  | -0.8248 |
| 47 | C    | -5.6951 | 3.2283  | -1.5089 |
| 48 | C    | -5.5841 | 1.9992  | -2.1397 |
| 49 | C    | -4.3685 | 1.3272  | -2.0762 |
| 50 | C    | 4.6953  | 1.0097  | 0.3524  |
| 51 | C    | 5.9359  | 1.6348  | 0.4354  |
| 52 | C    | 6.4902  | 2.1845  | -0.7104 |
| 53 | C    | 5.8466  | 2.1189  | -1.9357 |
| 54 | C    | 4.6091  | 1.4856  | -2.0043 |

|    |   |         |        |         |
|----|---|---------|--------|---------|
| 55 | F | 7.6945  | 2.7927 | -0.6318 |
| 56 | F | -6.8675 | 3.8966 | -1.5720 |
| 57 | H | 1.8643  | 2.6442 | 0.4515  |
| 58 | H | 2.2883  | 1.3415 | 1.5325  |
| 59 | H | -3.1100 | 1.2102 | 1.2543  |
| 60 | H | -3.0736 | 1.9593 | 3.5944  |
| 61 | H | -2.5930 | 3.5557 | -0.2321 |
| 62 | H | -4.7525 | 4.7736 | -0.3663 |
| 63 | H | -6.4327 | 1.5909 | -2.6741 |
| 64 | H | -4.2643 | 0.3713 | -2.5774 |
| 65 | H | 4.2741  | 0.5613 | 1.2439  |
| 66 | H | 6.4766  | 1.6941 | 1.3718  |
| 67 | H | 6.3119  | 2.5545 | -2.8112 |
| 68 | H | 4.0964  | 1.4317 | -2.9586 |
| 69 | C | -0.9444 | 2.3059 | 3.6169  |
| 70 | H | -0.9196 | 2.6416 | 4.6477  |
| 71 | C | 0.2307  | 2.2222 | 2.8807  |
| 72 | H | 1.1786  | 2.4767 | 3.3445  |

Prod41

|    | Atom | X       | Y       | Z       |
|----|------|---------|---------|---------|
| 1  | C    | 1.3998  | -1.5372 | 0.2282  |
| 2  | N    | 2.4065  | -2.1025 | -0.6646 |
| 3  | C    | 3.4288  | -1.0691 | -0.8977 |
| 4  | C    | 2.0556  | -2.7099 | -1.9637 |
| 5  | C    | 3.4273  | -2.7881 | -2.6365 |
| 6  | C    | 4.1062  | -1.4611 | -2.2315 |
| 7  | H    | 4.1385  | -1.0774 | -0.0710 |
| 8  | C    | 0.1092  | -2.3484 | 0.2688  |
| 9  | C    | 0.0332  | -3.0268 | 1.4999  |
| 10 | N    | 1.1339  | -2.7077 | 2.2787  |
| 11 | C    | 1.9786  | -1.8082 | 1.6608  |
| 12 | C    | -0.8906 | -2.5387 | -0.6668 |
| 13 | C    | -1.9529 | -3.3861 | -0.3378 |
| 14 | C    | -2.0284 | -4.0530 | 0.8808  |
| 15 | C    | -1.0199 | -3.8768 | 1.8213  |
| 16 | O    | 2.9945  | -1.3665 | 2.1475  |
| 17 | H    | 1.3243  | -3.0681 | 3.2019  |
| 18 | N    | -3.0350 | -3.5723 | -1.3177 |
| 19 | O    | -2.9693 | -2.9396 | -2.3656 |
| 20 | O    | -3.9406 | -4.3446 | -1.0275 |
| 21 | H    | 1.5989  | -3.6898 | -1.8186 |
| 22 | H    | 1.3745  | -2.0886 | -2.5589 |
| 23 | H    | 3.9846  | -3.6370 | -2.2329 |
| 24 | H    | 3.3515  | -2.9139 | -3.7181 |
| 25 | H    | 5.1867  | -1.5668 | -2.1257 |
| 26 | H    | 3.9288  | -0.6911 | -2.9865 |
| 27 | H    | -0.8884 | -2.0581 | -1.6334 |
| 28 | H    | -2.8739 | -4.6978 | 1.0751  |
| 29 | H    | -1.0590 | -4.3872 | 2.7757  |
| 30 | C    | -0.0872 | 0.7081  | 1.9061  |
| 31 | C    | 1.2101  | 0.9462  | 1.1803  |
| 32 | C    | 1.3401  | 0.0553  | -0.0788 |
| 33 | C    | 0.1127  | 0.3309  | -0.9796 |
| 34 | C    | -1.1595 | 0.8066  | -0.3160 |
| 35 | C    | -1.2681 | 0.6394  | 1.1468  |
| 36 | C    | -2.4781 | 0.3405  | 1.7905  |
| 37 | C    | -2.5234 | 0.1744  | 3.1689  |
| 38 | C    | -2.0782 | 1.3338  | -1.1613 |
| 39 | H    | -1.8329 | 1.2235  | -2.2146 |
| 40 | C    | -3.3314 | 2.0473  | -0.8996 |
| 41 | C    | 2.6577  | 0.2879  | -0.9150 |
| 42 | C    | 3.5095  | 1.4838  | -0.5459 |
| 43 | H    | 2.3177  | 0.4367  | -1.9400 |
| 44 | O    | 0.1710  | 0.1789  | -2.1860 |
| 45 | C    | -3.5062 | 2.9240  | 0.1858  |
| 46 | C    | -4.6903 | 3.6225  | 0.3519  |
| 47 | C    | -5.7426 | 3.4549  | -0.5624 |
| 48 | C    | -5.5781 | 2.5941  | -1.6563 |
| 49 | C    | -4.3805 | 1.9161  | -1.8263 |
| 50 | C    | 4.3392  | 1.4944  | 0.5862  |
| 51 | C    | 5.1280  | 2.5967  | 0.8851  |
| 52 | C    | 5.1082  | 3.7247  | 0.0521  |
| 53 | C    | 4.2875  | 3.7272  | -1.0829 |
| 54 | C    | 3.5042  | 2.6165  | -1.3705 |

|    |   |         |         |         |
|----|---|---------|---------|---------|
| 55 | H | 1.2609  | 1.9911  | 0.8527  |
| 56 | H | 2.0527  | 0.7927  | 1.8490  |
| 57 | H | -3.3830 | 0.2288  | 1.2072  |
| 58 | H | -3.4662 | -0.0544 | 3.6523  |
| 59 | H | -2.7009 | 3.0687  | 0.8938  |
| 60 | H | -4.8102 | 4.3043  | 1.1846  |
| 61 | H | -6.3843 | 2.4705  | -2.3684 |
| 62 | H | -4.2541 | 1.2609  | -2.6807 |
| 63 | H | 4.3622  | 0.6352  | 1.2460  |
| 64 | H | 5.7636  | 2.5919  | 1.7621  |
| 65 | H | 4.2720  | 4.5938  | -1.7322 |
| 66 | H | 2.8774  | 2.6258  | -2.2556 |
| 67 | C | -1.3573 | 0.2928  | 3.9259  |
| 68 | H | -1.3918 | 0.1718  | 5.0027  |
| 69 | C | -0.1449 | 0.5465  | 3.2914  |
| 70 | H | 0.7698  | 0.6130  | 3.8711  |
| 71 | C | 5.9207  | 4.8616  | 0.3582  |
| 72 | N | 6.5760  | 5.7801  | 0.6068  |
| 73 | C | -6.9689 | 4.1678  | -0.3841 |
| 74 | N | -7.9598 | 4.7435  | -0.2371 |

TS41

|    | Atom | X       | Y       | Z       |
|----|------|---------|---------|---------|
| 1  | C    | 0.9246  | -2.5212 | -0.7355 |
| 2  | N    | 1.7657  | -2.0793 | -1.6993 |
| 3  | C    | 2.9312  | -1.4188 | -1.4440 |
| 4  | C    | 1.4556  | -2.1252 | -3.1555 |
| 5  | C    | 2.5673  | -1.2843 | -3.7974 |
| 6  | C    | 3.6849  | -1.2479 | -2.7376 |
| 7  | H    | 3.4268  | -1.6868 | -0.5233 |
| 8  | C    | -0.3980 | -3.0977 | -0.8753 |
| 9  | C    | -0.7428 | -3.6177 | 0.4008  |
| 10 | N    | 0.3194  | -3.4149 | 1.2695  |
| 11 | C    | 1.3728  | -2.7541 | 0.6555  |
| 12 | C    | -1.3376 | -3.2013 | -1.9085 |
| 13 | C    | -2.5654 | -3.8149 | -1.6634 |
| 14 | C    | -2.8761 | -4.3212 | -0.4006 |
| 15 | C    | -1.9630 | -4.2241 | 0.6509  |
| 16 | O    | 2.4390  | -2.4859 | 1.2074  |
| 17 | H    | 1.4754  | -3.1737 | -3.4678 |
| 18 | H    | 0.4747  | -1.6996 | -3.3339 |
| 19 | H    | 2.8980  | -1.7059 | -4.7472 |
| 20 | H    | 2.1908  | -0.2780 | -3.9845 |
| 21 | H    | 4.3905  | -2.0778 | -2.8674 |
| 22 | H    | 4.2680  | -0.3255 | -2.7568 |
| 23 | H    | -1.1344 | -2.8102 | -2.8942 |
| 24 | H    | -3.8367 | -4.7934 | -0.2303 |
| 25 | H    | -2.2011 | -4.6085 | 1.6358  |
| 26 | C    | -0.1594 | 0.0028  | 2.1098  |
| 27 | C    | 1.1518  | 0.4132  | 1.4866  |
| 28 | C    | 1.1946  | 0.3207  | -0.0147 |
| 29 | C    | -0.0387 | 0.3225  | -0.7927 |
| 30 | C    | -1.3289 | 0.4915  | -0.0336 |
| 31 | C    | -1.3536 | 0.0330  | 1.3692  |
| 32 | C    | -2.5271 | -0.4675 | 1.9623  |
| 33 | C    | -2.5349 | -0.9127 | 3.2759  |
| 34 | C    | -2.3385 | 1.0543  | -0.7418 |
| 35 | H    | -2.1176 | 1.1617  | -1.8007 |
| 36 | C    | 2.3823  | 0.4559  | -0.7611 |
| 37 | H    | 2.1805  | 0.8081  | -1.7688 |
| 38 | O    | -0.0303 | 0.2847  | -2.0327 |
| 39 | H    | 1.4003  | 1.4430  | 1.7890  |
| 40 | H    | 1.9344  | -0.2143 | 1.9186  |
| 41 | H    | -3.4351 | -0.5176 | 1.3763  |
| 42 | H    | -3.4534 | -1.2902 | 3.7112  |
| 43 | C    | -1.3587 | -0.8828 | 4.0277  |
| 44 | H    | -1.3573 | -1.2208 | 5.0582  |
| 45 | C    | -0.1818 | -0.4398 | 3.4364  |
| 46 | H    | 0.7446  | -0.4487 | 4.0022  |
| 47 | C    | 3.6675  | 0.9689  | -0.2078 |
| 48 | C    | 4.2417  | 2.0798  | -0.7987 |
| 49 | C    | 4.3498  | 0.3570  | 0.8845  |
| 50 | C    | 5.4567  | 2.6400  | -0.3303 |
| 51 | H    | 3.7441  | 2.5557  | -1.6384 |
| 52 | C    | 5.5320  | 0.8700  | 1.3549  |
| 53 | H    | 3.9408  | -0.5409 | 1.3311  |
| 54 | C    | 6.0391  | 3.7914  | -0.9231 |

|    |   |         |         |         |
|----|---|---------|---------|---------|
| 55 | C | 6.1203  | 2.0241  | 0.7758  |
| 56 | H | 6.0388  | 0.3854  | 2.1833  |
| 57 | C | 7.2191  | 4.3077  | -0.4454 |
| 58 | H | 5.5341  | 4.2605  | -1.7612 |
| 59 | C | 7.3381  | 2.5805  | 1.2435  |
| 60 | C | 7.8758  | 3.6964  | 0.6484  |
| 61 | H | 7.6526  | 5.1885  | -0.9056 |
| 62 | H | 7.8399  | 2.1098  | 2.0826  |
| 63 | H | 8.8066  | 4.1140  | 1.0155  |
| 64 | C | -3.6443 | 1.5827  | -0.3365 |
| 65 | C | -4.6797 | 1.5793  | -1.2573 |
| 66 | C | -3.8773 | 2.1906  | 0.9346  |
| 67 | C | -5.9590 | 2.1055  | -0.9553 |
| 68 | H | -4.5139 | 1.1517  | -2.2414 |
| 69 | C | -5.0968 | 2.7267  | 1.2498  |
| 70 | H | -3.0665 | 2.2429  | 1.6491  |
| 71 | C | -7.0296 | 2.0788  | -1.8877 |
| 72 | C | -6.1796 | 2.6925  | 0.3299  |
| 73 | H | -5.2482 | 3.1970  | 2.2161  |
| 74 | C | -8.2578 | 2.6033  | -1.5645 |
| 75 | H | -6.8618 | 1.6344  | -2.8633 |
| 76 | C | -7.4566 | 3.2272  | 0.6309  |
| 77 | C | -8.4742 | 3.1831  | -0.2931 |
| 78 | H | -9.0675 | 2.5754  | -2.2851 |
| 79 | H | -7.6200 | 3.6742  | 1.6062  |
| 80 | H | -9.4475 | 3.5947  | -0.0504 |
| 81 | H | -3.2886 | -3.8935 | -2.4665 |
| 82 | H | 0.3102  | -3.5866 | 2.2620  |



Prod51

|    | Atom | X       | Y       | Z       |
|----|------|---------|---------|---------|
| 1  | C    | -2.1469 | 0.5098  | 0.6995  |
| 2  | N    | -3.0333 | 1.3879  | -0.0384 |
| 3  | C    | -2.3720 | 2.6861  | -0.3330 |
| 4  | C    | -4.4106 | 1.6152  | 0.4418  |
| 5  | C    | -4.6741 | 3.1028  | 0.1414  |
| 6  | C    | -3.2857 | 3.7494  | 0.2895  |
| 7  | H    | -2.3573 | 2.8268  | -1.4206 |
| 8  | C    | -2.4895 | -0.9646 | 0.5826  |
| 9  | C    | -2.4598 | -1.5593 | 1.8562  |
| 10 | N    | -2.1943 | -0.5884 | 2.8172  |
| 11 | C    | -2.1971 | 0.6887  | 2.2732  |
| 12 | C    | -2.8842 | -1.7085 | -0.5077 |
| 13 | C    | -3.1607 | -3.0652 | -0.3149 |
| 14 | C    | -3.0798 | -3.6703 | 0.9363  |
| 15 | C    | -2.7341 | -2.9097 | 2.0492  |
| 16 | O    | -2.2798 | 1.7112  | 2.9056  |
| 17 | H    | -2.2842 | -0.7286 | 3.8137  |
| 18 | N    | -3.5473 | -3.8786 | -1.4752 |
| 19 | O    | -3.5758 | -3.3287 | -2.5721 |
| 20 | O    | -3.8137 | -5.0591 | -1.2850 |
| 21 | H    | -5.1183 | 0.9563  | -0.0686 |
| 22 | H    | -4.4966 | 1.4322  | 1.5195  |
| 23 | H    | -5.0405 | 3.2218  | -0.8830 |
| 24 | H    | -5.4213 | 3.5303  | 0.8123  |
| 25 | H    | -3.2097 | 4.7187  | -0.2073 |
| 26 | H    | -3.0408 | 3.8768  | 1.3469  |
| 27 | H    | -2.9939 | -1.2736 | -1.4890 |
| 28 | H    | -3.3044 | -4.7240 | 1.0238  |
| 29 | H    | -2.7004 | -3.3571 | 3.0351  |
| 30 | C    | 0.0789  | -0.9061 | -1.4209 |
| 31 | C    | -0.4468 | 0.5017  | -1.2960 |
| 32 | C    | -0.7116 | 0.9733  | 0.1546  |
| 33 | C    | 0.4598  | 0.5751  | 1.0811  |
| 34 | C    | 1.4394  | -0.4637 | 0.5984  |
| 35 | C    | 0.9977  | -1.3789 | -0.4698 |
| 36 | C    | 1.4213  | -2.7163 | -0.5346 |
| 37 | C    | 1.0074  | -3.5425 | -1.5700 |
| 38 | C    | 2.6496  | -0.4222 | 1.2098  |
| 39 | H    | 2.6944  | 0.2556  | 2.0585  |
| 40 | C    | 3.9161  | -1.0952 | 0.9105  |
| 41 | C    | -0.9466 | 2.5362  | 0.2202  |
| 42 | C    | 0.1265  | 3.4182  | -0.3859 |
| 43 | H    | -0.9828 | 2.7681  | 1.2842  |
| 44 | O    | 0.6127  | 1.1416  | 2.1459  |
| 45 | C    | 4.3307  | -1.4289 | -0.3916 |
| 46 | C    | 5.5698  | -2.0038 | -0.6190 |
| 47 | C    | 6.4325  | -2.2725 | 0.4558  |
| 48 | C    | 6.0412  | -1.9301 | 1.7573  |
| 49 | C    | 4.8074  | -1.3351 | 1.9717  |
| 50 | C    | 1.1385  | 3.9151  | 0.4498  |
| 51 | C    | 2.1470  | 4.7323  | -0.0409 |
| 52 | C    | 2.1648  | 5.0844  | -1.3973 |
| 53 | C    | 1.1573  | 4.6049  | -2.2438 |

|    |   |         |         |         |
|----|---|---------|---------|---------|
| 54 | C | 0.1562  | 3.7841  | -1.7394 |
| 55 | H | 0.2943  | 1.1836  | -1.7269 |
| 56 | H | -1.3543 | 0.6176  | -1.8908 |
| 57 | H | 2.0758  | -3.1062 | 0.2346  |
| 58 | H | 1.3413  | -4.5731 | -1.6052 |
| 59 | H | 3.6818  | -1.2215 | -1.2317 |
| 60 | H | 5.8820  | -2.2459 | -1.6272 |
| 61 | H | 6.7099  | -2.1224 | 2.5869  |
| 62 | H | 4.5188  | -1.0557 | 2.9788  |
| 63 | H | 1.1295  | 3.6495  | 1.5001  |
| 64 | H | 2.9188  | 5.1068  | 0.6202  |
| 65 | H | 1.1620  | 4.8805  | -3.2912 |
| 66 | H | -0.6136 | 3.4364  | -2.4167 |
| 67 | C | 0.1567  | -3.0456 | -2.5587 |
| 68 | H | -0.1674 | -3.6818 | -3.3739 |
| 69 | C | -0.3093 | -1.7387 | -2.4729 |
| 70 | H | -1.0042 | -1.3686 | -3.2189 |
| 71 | C | 7.7058  | -2.8790 | 0.2227  |
| 72 | N | 8.7337  | -3.3721 | 0.0349  |
| 73 | C | 3.1971  | 5.9303  | -1.9123 |
| 74 | N | 4.0311  | 6.6122  | -2.3295 |

TS51

|    | Atom | X       | Y       | Z       |
|----|------|---------|---------|---------|
| 1  | C    | 0.8195  | 0.7074  | 2.1125  |
| 2  | N    | 1.4011  | -0.4305 | 2.5498  |
| 3  | C    | 2.3619  | -1.1183 | 1.8579  |
| 4  | C    | 0.9496  | -1.1798 | 3.7696  |
| 5  | C    | 1.6327  | -2.5408 | 3.6237  |
| 6  | C    | 2.8497  | -2.2575 | 2.7239  |
| 7  | H    | 3.0846  | -0.5338 | 1.3095  |
| 8  | C    | 1.3773  | 1.7616  | 1.2894  |
| 9  | C    | 0.4375  | 2.8366  | 1.3068  |
| 10 | N    | -0.6310 | 2.4776  | 2.0932  |
| 11 | C    | -0.4685 | 1.2099  | 2.6634  |
| 12 | C    | 2.5630  | 1.9370  | 0.5837  |
| 13 | C    | 2.7710  | 3.1426  | -0.0900 |
| 14 | C    | 1.8482  | 4.1855  | -0.0723 |
| 15 | C    | 0.6627  | 4.0336  | 0.6408  |
| 16 | O    | -1.2579 | 0.6956  | 3.4306  |
| 17 | H    | -1.4535 | 3.0334  | 2.2676  |
| 18 | N    | 4.0071  | 3.2964  | -0.8669 |
| 19 | O    | 4.7365  | 2.3120  | -0.9805 |
| 20 | O    | 4.2416  | 4.3890  | -1.3657 |
| 21 | H    | 1.3127  | -0.6185 | 4.6365  |
| 22 | H    | -0.1319 | -1.2214 | 3.7998  |
| 23 | H    | 1.9127  | -2.9591 | 4.5909  |
| 24 | H    | 0.9477  | -3.2328 | 3.1332  |
| 25 | H    | 3.7158  | -1.9305 | 3.3115  |
| 26 | H    | 3.1677  | -3.1184 | 2.1340  |

|    |   |         |         |         |
|----|---|---------|---------|---------|
| 27 | H | 3.3462  | 1.1984  | 0.5392  |
| 28 | H | 2.0682  | 5.0936  | -0.6149 |
| 29 | H | -0.0679 | 4.8322  | 0.6710  |
| 30 | C | -0.7115 | 0.7994  | -1.5273 |
| 31 | C | 0.4483  | -0.1561 | -1.3808 |
| 32 | C | 0.4016  | -1.0390 | -0.1669 |
| 33 | C | -0.8565 | -1.2665 | 0.5393  |
| 34 | C | -2.0984 | -0.6197 | -0.0185 |
| 35 | C | -1.9266 | 0.5854  | -0.8535 |
| 36 | C | -2.9239 | 1.5754  | -0.9377 |
| 37 | C | -2.7573 | 2.6993  | -1.7324 |
| 38 | C | -3.2543 | -1.2380 | 0.3231  |
| 39 | H | -3.1270 | -2.0155 | 1.0722  |
| 40 | C | -4.6298 | -1.0755 | -0.1590 |
| 41 | C | 1.4644  | -1.8864 | 0.2341  |
| 42 | C | 2.6036  | -2.2658 | -0.6535 |
| 43 | H | 1.0795  | -2.7365 | 0.7900  |
| 44 | O | -0.9209 | -2.0402 | 1.5022  |
| 45 | C | -4.9485 | -0.8113 | -1.5034 |
| 46 | C | -6.2659 | -0.7352 | -1.9240 |
| 47 | C | -7.3122 | -0.9173 | -1.0057 |
| 48 | C | -7.0112 | -1.1990 | 0.3342  |
| 49 | C | -5.6888 | -1.2904 | 0.7410  |
| 50 | C | 2.8308  | -3.6351 | -0.8732 |
| 51 | C | 3.8676  | -4.0798 | -1.6804 |
| 52 | C | 4.7270  | -3.1539 | -2.2875 |
| 53 | C | 4.5246  | -1.7848 | -2.0692 |
| 54 | C | 3.4779  | -1.3534 | -1.2653 |

|    |   |         |         |         |
|----|---|---------|---------|---------|
| 55 | H | 0.5220  | -0.7887 | -2.2796 |
| 56 | H | 1.3657  | 0.4397  | -1.3830 |
| 57 | H | -3.8355 | 1.4578  | -0.3674 |
| 58 | H | -3.5445 | 3.4430  | -1.7866 |
| 59 | H | -4.1527 | -0.6791 | -2.2248 |
| 60 | H | -6.4966 | -0.5406 | -2.9641 |
| 61 | H | -7.8152 | -1.3526 | 1.0432  |
| 62 | H | -5.4631 | -1.5222 | 1.7758  |
| 63 | H | 2.1715  | -4.3614 | -0.4111 |
| 64 | H | 4.0191  | -5.1397 | -1.8433 |
| 65 | H | 5.1895  | -1.0617 | -2.5249 |
| 66 | H | 3.3636  | -0.2879 | -1.1173 |
| 67 | C | -1.5759 | 2.8699  | -2.4569 |
| 68 | H | -1.4403 | 3.7397  | -3.0895 |
| 69 | C | -0.5609 | 1.9308  | -2.3359 |
| 70 | H | 0.3754  | 2.0797  | -2.8641 |
| 71 | C | -8.6721 | -0.8285 | -1.4365 |
| 72 | N | -9.7714 | -0.7536 | -1.7849 |
| 73 | C | 5.8026  | -3.6044 | -3.1154 |
| 74 | N | 6.6704  | -3.9722 | -3.7834 |
